# Supplementary material for: Linking diffuse radiation and ecosystem productivity of a desert steppe ecosystem
Source: PeerJ. 2020 May 5;8:e9043. doi: 10.7717/peerj.9043 (PMC7207212; doi:10.7717/peerj.9043)
Supplement: Supplemental Information 3 — VWC soil volumetric water content in units of m3 m-3, port 1, 10 cm; port 2, 30 cm; port 3, 70 cm; port 4, 120 cm; port 5, 10 cm [file peerj-08-9043-s003.xls]

## Sheet: Sheet1
yc_2_em50_1_full	Port 1	Port 1
Measurement Time	SWC	Temp
2014-05-01	0.147602	18.6
2014-05-01 00:30:00	0.147602	18.3
2014-05-01 01:00:00	0.147177	18.1
2014-05-01 01:30:00	0.147177	17.8
2014-05-01 02:00:00	0.146752	17.5
2014-05-01 02:30:00	0.146752	17.2
2014-05-01 03:00:00	0.146326	17
2014-05-01 03:30:00	0.146326	16.8
2014-05-01 04:00:00	0.146326	16.7
2014-05-01 04:30:00	0.145901	16.5
2014-05-01 05:00:00	0.145901	16.3
2014-05-01 05:30:00	0.145901	16.2
2014-05-01 06:00:00	0.145475	16
2014-05-01 06:30:00	0.145475	15.8
2014-05-01 07:00:00	0.145901	15.6
2014-05-01 07:30:00	0.145901	15.3
2014-05-01 08:00:00	0.145901	15
2014-05-01 08:30:00	0.146326	14.7
2014-05-01 09:00:00	0.146326	14.5
2014-05-01 09:30:00	0.146326	14.2
2014-05-01 10:00:00	0.146326	14
2014-05-01 10:30:00	0.146326	13.7
2014-05-01 11:00:00	0.145901	13.6
2014-05-01 11:30:00	0.145475	13.6
2014-05-01 12:00:00	0.145901	14.2
2014-05-01 12:30:00	0.146752	15.1
2014-05-01 13:00:00	0.146752	16
2014-05-01 13:30:00	0.147177	16.6
2014-05-01 14:00:00	0.147177	17.1
2014-05-01 14:30:00	0.147602	17.8
2014-05-01 15:00:00	0.148026	18.5
2014-05-01 15:30:00	0.14845	19
2014-05-01 16:00:00	0.14845	19.5
2014-05-01 16:30:00	0.14845	19.7
2014-05-01 17:00:00	0.14845	19.8
2014-05-01 17:30:00	0.14845	19.6
2014-05-01 18:00:00	0.148026	19.4
2014-05-01 18:30:00	0.148026	19
2014-05-01 19:00:00	0.147177	18.5
2014-05-01 19:30:00	0.146752	17.9
2014-05-01 20:00:00	0.146326	17.2
2014-05-01 20:30:00	0.145901	16.6
2014-05-01 21:00:00	0.145475	16
2014-05-01 21:30:00	0.145475	15.4
2014-05-01 22:00:00	0.145048	14.8
2014-05-01 22:30:00	0.144621	14.3
2014-05-01 23:00:00	0.144194	13.8
2014-05-01 23:30:00	0.144194	13.4
2014-05-02	0.144194	13
2014-05-02 00:30:00	0.144194	12.5
2014-05-02 01:00:00	0.143766	12.1
2014-05-02 01:30:00	0.143766	11.7
2014-05-02 02:00:00	0.143339	11.3
2014-05-02 02:30:00	0.143339	11
2014-05-02 03:00:00	0.143339	10.7
2014-05-02 03:30:00	0.14291	10.3
2014-05-02 04:00:00	0.14291	10
2014-05-02 04:30:00	0.14291	9.7
2014-05-02 05:00:00	0.14291	9.4
2014-05-02 05:30:00	0.142482	9.1
2014-05-02 06:00:00	0.142482	8.9
2014-05-02 06:30:00	0.142482	8.6
2014-05-02 07:00:00	0.142482	8.4
2014-05-02 07:30:00	0.142482	8.2
2014-05-02 08:00:00	0.142482	8.2
2014-05-02 08:30:00	0.142482	8.4
2014-05-02 09:00:00	0.14291	8.9
2014-05-02 09:30:00	0.143339	9.6
2014-05-02 10:00:00	0.143766	10.6
2014-05-02 10:30:00	0.144194	11.8
2014-05-02 11:00:00	0.145048	13.1
2014-05-02 11:30:00	0.145901	14.6
2014-05-02 12:00:00	0.146752	16
2014-05-02 12:30:00	0.147602	17.4
2014-05-02 13:00:00	0.148874	18.7
2014-05-02 13:30:00	0.149297	19.6
2014-05-02 14:00:00	0.14972	20.3
2014-05-02 14:30:00	0.150564	21.1
2014-05-02 15:00:00	0.150986	21.9
2014-05-02 15:30:00	0.151408	22.6
2014-05-02 16:00:00	0.151829	23.1
2014-05-02 16:30:00	0.151829	23.3
2014-05-02 17:00:00	0.151408	23.3
2014-05-02 17:30:00	0.151408	23.1
2014-05-02 18:00:00	0.150986	22.8
2014-05-02 18:30:00	0.150564	22.2
2014-05-02 19:00:00	0.14972	21.5
2014-05-02 19:30:00	0.149297	20.8
2014-05-02 20:00:00	0.148874	20
2014-05-02 20:30:00	0.148026	19.3
2014-05-02 21:00:00	0.147602	18.5
2014-05-02 21:30:00	0.147177	17.8
2014-05-02 22:00:00	0.146752	17.1
2014-05-02 22:30:00	0.146326	16.5
2014-05-02 23:00:00	0.145901	15.9
2014-05-02 23:30:00	0.145901	15.4
2014-05-03	0.145475	15
2014-05-03 00:30:00	0.145048	14.6
2014-05-03 01:00:00	0.145048	14.2
2014-05-03 01:30:00	0.144621	14
2014-05-03 02:00:00	0.144621	13.7
2014-05-03 02:30:00	0.144621	13.5
2014-05-03 03:00:00	0.144194	13.3
2014-05-03 03:30:00	0.144194	13.1
2014-05-03 04:00:00	0.144194	12.9
2014-05-03 04:30:00	0.144194	12.7
2014-05-03 05:00:00	0.143766	12.5
2014-05-03 05:30:00	0.143766	12.3
2014-05-03 06:00:00	0.143766	12.1
2014-05-03 06:30:00	0.143766	11.9
2014-05-03 07:00:00	0.143339	11.8
2014-05-03 07:30:00	0.143339	11.7
2014-05-03 08:00:00	0.143339	11.7
2014-05-03 08:30:00	0.143339	11.8
2014-05-03 09:00:00	0.143339	12.1
2014-05-03 09:30:00	0.143766	12.4
2014-05-03 10:00:00	0.143766	12.8
2014-05-03 10:30:00	0.143766	13.3
2014-05-03 11:00:00	0.144194	13.9
2014-05-03 11:30:00	0.145048	14.8
2014-05-03 12:00:00	0.145475	16
2014-05-03 12:30:00	0.146326	17.1
2014-05-03 13:00:00	0.146752	17.9
2014-05-03 13:30:00	0.147177	18.5
2014-05-03 14:00:00	0.147602	19.1
2014-05-03 14:30:00	0.147602	19.7
2014-05-03 15:00:00	0.148026	20.3
2014-05-03 15:30:00	0.14845	20.8
2014-05-03 16:00:00	0.14845	21.2
2014-05-03 16:30:00	0.148874	21.5
2014-05-03 17:00:00	0.148874	21.6
2014-05-03 17:30:00	0.14845	21.6
2014-05-03 18:00:00	0.148026	21.4
2014-05-03 18:30:00	0.147602	21
2014-05-03 19:00:00	0.147177	20.4
2014-05-03 19:30:00	0.146752	19.7
2014-05-03 20:00:00	0.146326	19
2014-05-03 20:30:00	0.145901	18.4
2014-05-03 21:00:00	0.145048	17.7
2014-05-03 21:30:00	0.144621	17
2014-05-03 22:00:00	0.144194	16.4
2014-05-03 22:30:00	0.144194	15.8
2014-05-03 23:00:00	0.143766	15.3
2014-05-03 23:30:00	0.143339	14.8
2014-05-04	0.143339	14.3
2014-05-04 00:30:00	0.14291	13.9
2014-05-04 01:00:00	0.14291	13.5
2014-05-04 01:30:00	0.142482	13.1
2014-05-04 02:00:00	0.142482	12.7
2014-05-04 02:30:00	0.142053	12.4
2014-05-04 03:00:00	0.142053	12
2014-05-04 03:30:00	0.141623	11.6
2014-05-04 04:00:00	0.141623	11.2
2014-05-04 04:30:00	0.141623	10.9
2014-05-04 05:00:00	0.141623	10.7
2014-05-04 05:30:00	0.141194	10.4
2014-05-04 06:00:00	0.141194	10.2
2014-05-04 06:30:00	0.141194	9.9
2014-05-04 07:00:00	0.141194	9.7
2014-05-04 07:30:00	0.140764	9.6
2014-05-04 08:00:00	0.140764	9.6
2014-05-04 08:30:00	0.141194	9.7
2014-05-04 09:00:00	0.141194	10.2
2014-05-04 09:30:00	0.141623	10.8
2014-05-04 10:00:00	0.142053	11.7
2014-05-04 10:30:00	0.142482	12.7
2014-05-04 11:00:00	0.14291	13.8
2014-05-04 11:30:00	0.143766	15
2014-05-04 12:00:00	0.144194	16.2
2014-05-04 12:30:00	0.145048	17.3
2014-05-04 13:00:00	0.145901	18.4
2014-05-04 13:30:00	0.146326	19.4
2014-05-04 14:00:00	0.146752	20
2014-05-04 14:30:00	0.147177	20.8
2014-05-04 15:00:00	0.147602	21.5
2014-05-04 15:30:00	0.148026	22.1
2014-05-04 16:00:00	0.14845	22.6
2014-05-04 16:30:00	0.14845	22.9
2014-05-04 17:00:00	0.14845	23
2014-05-04 17:30:00	0.148026	23
2014-05-04 18:00:00	0.148026	22.7
2014-05-04 18:30:00	0.147602	22.3
2014-05-04 19:00:00	0.146752	21.7
2014-05-04 19:30:00	0.146326	20.9
2014-05-04 20:00:00	0.145475	20.2
2014-05-04 20:30:00	0.145048	19.5
2014-05-04 21:00:00	0.144621	18.8
2014-05-04 21:30:00	0.144194	18.1
2014-05-04 22:00:00	0.143766	17.4
2014-05-04 22:30:00	0.143339	16.8
2014-05-04 23:00:00	0.14291	16.3
2014-05-04 23:30:00	0.14291	15.8
2014-05-05	0.142482	15.3
2014-05-05 00:30:00	0.142482	14.9
2014-05-05 01:00:00	0.142053	14.5
2014-05-05 01:30:00	0.141623	14.1
2014-05-05 02:00:00	0.141623	13.7
2014-05-05 02:30:00	0.141194	13.3
2014-05-05 03:00:00	0.141194	12.9
2014-05-05 03:30:00	0.141194	12.5
2014-05-05 04:00:00	0.140764	12.2
2014-05-05 04:30:00	0.140764	11.8
2014-05-05 05:00:00	0.140764	11.5
2014-05-05 05:30:00	0.140333	11.3
2014-05-05 06:00:00	0.140333	11.1
2014-05-05 06:30:00	0.140333	10.9
2014-05-05 07:00:00	0.139902	10.7
2014-05-05 07:30:00	0.139902	10.5
2014-05-05 08:00:00	0.139902	10.5
2014-05-05 08:30:00	0.139902	10.8
2014-05-05 09:00:00	0.140333	11.2
2014-05-05 09:30:00	0.140764	11.9
2014-05-05 10:00:00	0.141194	12.7
2014-05-05 10:30:00	0.141623	13.7
2014-05-05 11:00:00	0.142053	14.7
2014-05-05 11:30:00	0.14291	15.9
2014-05-05 12:00:00	0.143339	17
2014-05-05 12:30:00	0.144194	18.1
2014-05-05 13:00:00	0.144621	19.2
2014-05-05 13:30:00	0.145475	20.1
2014-05-05 14:00:00	0.145475	20.8
2014-05-05 14:30:00	0.145901	21.5
2014-05-05 15:00:00	0.146752	22.3
2014-05-05 15:30:00	0.146752	22.9
2014-05-05 16:00:00	0.147177	23.4
2014-05-05 16:30:00	0.147177	23.7
2014-05-05 17:00:00	0.146752	23.8
2014-05-05 17:30:00	0.146752	23.8
2014-05-05 18:00:00	0.146752	23.6
2014-05-05 18:30:00	0.146326	23.1
2014-05-05 19:00:00	0.145475	22.5
2014-05-05 19:30:00	0.145048	21.9
2014-05-05 20:00:00	0.144621	21.2
2014-05-05 20:30:00	0.144194	20.5
2014-05-05 21:00:00	0.143766	19.8
2014-05-05 21:30:00	0.143339	19.1
2014-05-05 22:00:00	0.14291	18.4
2014-05-05 22:30:00	0.142482	17.8
2014-05-05 23:00:00	0.142053	17.2
2014-05-05 23:30:00	0.141623	16.7
2014-05-06	0.141194	16.2
2014-05-06 00:30:00	0.141194	15.7
2014-05-06 01:00:00	0.140764	15.3
2014-05-06 01:30:00	0.140764	14.9
2014-05-06 02:00:00	0.140333	14.6
2014-05-06 02:30:00	0.140333	14.3
2014-05-06 03:00:00	0.139902	14
2014-05-06 03:30:00	0.139902	13.8
2014-05-06 04:00:00	0.139902	13.6
2014-05-06 04:30:00	0.139902	13.4
2014-05-06 05:00:00	0.139471	13.2
2014-05-06 05:30:00	0.139471	13
2014-05-06 06:00:00	0.139471	12.8
2014-05-06 06:30:00	0.139471	12.7
2014-05-06 07:00:00	0.139471	12.6
2014-05-06 07:30:00	0.139471	12.5
2014-05-06 08:00:00	0.139471	12.5
2014-05-06 08:30:00	0.139471	12.7
2014-05-06 09:00:00	0.139471	13.1
2014-05-06 09:30:00	0.139471	13.6
2014-05-06 10:00:00	0.139902	14.3
2014-05-06 10:30:00	0.140764	15.1
2014-05-06 11:00:00	0.141194	16
2014-05-06 11:30:00	0.141194	16.9
2014-05-06 12:00:00	0.142053	17.9
2014-05-06 12:30:00	0.142482	18.9
2014-05-06 13:00:00	0.143339	19.9
2014-05-06 13:30:00	0.143766	20.8
2014-05-06 14:00:00	0.143766	21.4
2014-05-06 14:30:00	0.144194	21.7
2014-05-06 15:00:00	0.144194	21.9
2014-05-06 15:30:00	0.144194	22.3
2014-05-06 16:00:00	0.144194	22.7
2014-05-06 16:30:00	0.144194	23.1
2014-05-06 17:00:00	0.144194	23.2
2014-05-06 17:30:00	0.144194	23.1
2014-05-06 18:00:00	0.143766	22.8
2014-05-06 18:30:00	0.143339	22.4
2014-05-06 19:00:00	0.14291	22
2014-05-06 19:30:00	0.14291	21.6
2014-05-06 20:00:00	0.142482	21.1
2014-05-06 20:30:00	0.142053	20.6
2014-05-06 21:00:00	0.141623	20.2
2014-05-06 21:30:00	0.141623	19.7
2014-05-06 22:00:00	0.141194	19.3
2014-05-06 22:30:00	0.140764	18.8
2014-05-06 23:00:00	0.140764	18.5
2014-05-06 23:30:00	0.140333	18
2014-05-07	0.139902	17.6
2014-05-07 00:30:00	0.139902	17.2
2014-05-07 01:00:00	0.139471	16.9
2014-05-07 01:30:00	0.139471	16.5
2014-05-07 02:00:00	0.13904	16.2
2014-05-07 02:30:00	0.13904	15.8
2014-05-07 03:00:00	0.13904	15.5
2014-05-07 03:30:00	0.138608	15.2
2014-05-07 04:00:00	0.138608	14.9
2014-05-07 04:30:00	0.138175	14.6
2014-05-07 05:00:00	0.138175	14.3
2014-05-07 05:30:00	0.137743	14.1
2014-05-07 06:00:00	0.137743	13.8
2014-05-07 06:30:00	0.137743	13.6
2014-05-07 07:00:00	0.137743	13.4
2014-05-07 07:30:00	0.137743	13.3
2014-05-07 08:00:00	0.137743	13.3
2014-05-07 08:30:00	0.137743	13.5
2014-05-07 09:00:00	0.137743	13.9
2014-05-07 09:30:00	0.138175	14.5
2014-05-07 10:00:00	0.138608	15.1
2014-05-07 10:30:00	0.13904	15.9
2014-05-07 11:00:00	0.13904	16.9
2014-05-07 11:30:00	0.139902	17.8
2014-05-07 12:00:00	0.140333	18.8
2014-05-07 12:30:00	0.141194	19.8
2014-05-07 13:00:00	0.141623	20.7
2014-05-07 13:30:00	0.142053	21.5
2014-05-07 14:00:00	0.142482	22.2
2014-05-07 14:30:00	0.14291	22.9
2014-05-07 15:00:00	0.14291	23.6
2014-05-07 15:30:00	0.143339	24.1
2014-05-07 16:00:00	0.143339	24.5
2014-05-07 16:30:00	0.143339	24.7
2014-05-07 17:00:00	0.143339	24.8
2014-05-07 17:30:00	0.14291	24.8
2014-05-07 18:00:00	0.14291	24.6
2014-05-07 18:30:00	0.142482	24.3
2014-05-07 19:00:00	0.142053	24
2014-05-07 19:30:00	0.142053	23.5
2014-05-07 20:00:00	0.141623	23
2014-05-07 20:30:00	0.141194	22.5
2014-05-07 21:00:00	0.140764	22
2014-05-07 21:30:00	0.140764	21.5
2014-05-07 22:00:00	0.140333	21
2014-05-07 22:30:00	0.139902	20.5
2014-05-07 23:00:00	0.139471	20.1
2014-05-07 23:30:00	0.139471	19.7
2014-05-08	0.13904	19.3
2014-05-08 00:30:00	0.13904	18.9
2014-05-08 01:00:00	0.138608	18.5
2014-05-08 01:30:00	0.138175	18.1
2014-05-08 02:00:00	0.138175	17.8
2014-05-08 02:30:00	0.137743	17.5
2014-05-08 03:00:00	0.137743	17.3
2014-05-08 03:30:00	0.137743	17.1
2014-05-08 04:00:00	0.13731	17
2014-05-08 04:30:00	0.13731	16.8
2014-05-08 05:00:00	0.13731	16.7
2014-05-08 05:30:00	0.13731	16.6
2014-05-08 06:00:00	0.13731	16.4
2014-05-08 06:30:00	0.13731	16.3
2014-05-08 07:00:00	0.136877	16.1
2014-05-08 07:30:00	0.136877	16
2014-05-08 08:00:00	0.136877	16
2014-05-08 08:30:00	0.136877	16.1
2014-05-08 09:00:00	0.136877	16.3
2014-05-08 09:30:00	0.13731	16.7
2014-05-08 10:00:00	0.13731	17.1
2014-05-08 10:30:00	0.137743	17.7
2014-05-08 11:00:00	0.138175	18.3
2014-05-08 11:30:00	0.138175	18.9
2014-05-08 12:00:00	0.138608	19.6
2014-05-08 12:30:00	0.13904	20.3
2014-05-08 13:00:00	0.139471	21
2014-05-08 13:30:00	0.139471	21.6
2014-05-08 14:00:00	0.139902	22.1
2014-05-08 14:30:00	0.139902	22.5
2014-05-08 15:00:00	0.139902	22.9
2014-05-08 15:30:00	0.140333	23.3
2014-05-08 16:00:00	0.140333	23.5
2014-05-08 16:30:00	0.139902	23.6
2014-05-08 17:00:00	0.139902	23.5
2014-05-08 17:30:00	0.139902	23.4
2014-05-08 18:00:00	0.139471	23.3
2014-05-08 18:30:00	0.139471	23.1
2014-05-08 19:00:00	0.13904	22.8
2014-05-08 19:30:00	0.138608	22.4
2014-05-08 20:00:00	0.138608	22.1
2014-05-08 20:30:00	0.138608	21.7
2014-05-08 21:00:00	0.138175	21.4
2014-05-08 21:30:00	0.138175	21.1
2014-05-08 22:00:00	0.137743	20.8
2014-05-08 22:30:00	0.137743	20.5
2014-05-08 23:00:00	0.13731	20.2
2014-05-08 23:30:00	0.13731	20
2014-05-09	0.13731	19.8
2014-05-09 00:30:00	0.136877	19.6
2014-05-09 01:00:00	0.136877	19.3
2014-05-09 01:30:00	0.136877	19.1
2014-05-09 02:00:00	0.136443	18.9
2014-05-09 02:30:00	0.136443	18.7
2014-05-09 03:00:00	0.136443	18.5
2014-05-09 03:30:00	0.136009	18.3
2014-05-09 04:00:00	0.136009	18.1
2014-05-09 04:30:00	0.135574	17.8
2014-05-09 05:00:00	0.135574	17.5
2014-05-09 05:30:00	0.135574	17.3
2014-05-09 06:00:00	0.13514	17
2014-05-09 06:30:00	0.13514	16.7
2014-05-09 07:00:00	0.13514	16.4
2014-05-09 07:30:00	0.134704	16.2
2014-05-09 08:00:00	0.134704	16
2014-05-09 08:30:00	0.134704	15.9
2014-05-09 09:00:00	0.134704	15.8
2014-05-09 09:30:00	0.134704	15.8
2014-05-09 10:00:00	0.134704	15.9
2014-05-09 10:30:00	0.134704	16
2014-05-09 11:00:00	0.13514	16.1
2014-05-09 11:30:00	0.13514	16.2
2014-05-09 12:00:00	0.13514	16.2
2014-05-09 12:30:00	0.13514	16.2
2014-05-09 13:00:00	0.13514	16.2
2014-05-09 13:30:00	0.13514	16.3
2014-05-09 14:00:00	0.135574	16.2
2014-05-09 14:30:00	0.136009	16.1
2014-05-09 15:00:00	0.136443	16
2014-05-09 15:30:00	0.136443	15.7
2014-05-09 16:00:00	0.136009	15.4
2014-05-09 16:30:00	0.135574	15.1
2014-05-09 17:00:00	0.135574	14.9
2014-05-09 17:30:00	0.135574	14.7
2014-05-09 18:00:00	0.13514	14.4
2014-05-09 18:30:00	0.13514	14.1
2014-05-09 19:00:00	0.134704	13.9
2014-05-09 19:30:00	0.134704	13.7
2014-05-09 20:00:00	0.134704	13.6
2014-05-09 20:30:00	0.134269	13.4
2014-05-09 21:00:00	0.134269	13.2
2014-05-09 21:30:00	0.134269	13.1
2014-05-09 22:00:00	0.134269	12.9
2014-05-09 22:30:00	0.134269	12.7
2014-05-09 23:00:00	0.134269	12.6
2014-05-09 23:30:00	0.134269	12.4
2014-05-10	0.134269	12.3
2014-05-10 00:30:00	0.133833	12.2
2014-05-10 01:00:00	0.133833	12
2014-05-10 01:30:00	0.133833	11.9
2014-05-10 02:00:00	0.133833	11.8
2014-05-10 02:30:00	0.133833	11.6
2014-05-10 03:00:00	0.133833	11.5
2014-05-10 03:30:00	0.133833	11.4
2014-05-10 04:00:00	0.133833	11.3
2014-05-10 04:30:00	0.133833	11.2
2014-05-10 05:00:00	0.133397	11.1
2014-05-10 05:30:00	0.133397	10.9
2014-05-10 06:00:00	0.133397	10.7
2014-05-10 06:30:00	0.133397	10.5
2014-05-10 07:00:00	0.133397	10.4
2014-05-10 07:30:00	0.133397	10.3
2014-05-10 08:00:00	0.133397	10.2
2014-05-10 08:30:00	0.133397	10.3
2014-05-10 09:00:00	0.133397	10.6
2014-05-10 09:30:00	0.133833	11.2
2014-05-10 10:00:00	0.134269	12
2014-05-10 10:30:00	0.134704	13
2014-05-10 11:00:00	0.13514	14
2014-05-10 11:30:00	0.136009	15
2014-05-10 12:00:00	0.136443	16.2
2014-05-10 12:30:00	0.13731	17.3
2014-05-10 13:00:00	0.138175	18.6
2014-05-10 13:30:00	0.138608	19.5
2014-05-10 14:00:00	0.13904	20.3
2014-05-10 14:30:00	0.139471	21
2014-05-10 15:00:00	0.139902	21.6
2014-05-10 15:30:00	0.139902	21.8
2014-05-10 16:00:00	0.139471	21.4
2014-05-10 16:30:00	0.13904	20.9
2014-05-10 17:00:00	0.138608	20.4
2014-05-10 17:30:00	0.138175	20
2014-05-10 18:00:00	0.137743	19.6
2014-05-10 18:30:00	0.137743	19.1
2014-05-10 19:00:00	0.13731	18.6
2014-05-10 19:30:00	0.136877	18.1
2014-05-10 20:00:00	0.136443	17.6
2014-05-10 20:30:00	0.136009	17.1
2014-05-10 21:00:00	0.136009	16.6
2014-05-10 21:30:00	0.135574	16.1
2014-05-10 22:00:00	0.135574	15.6
2014-05-10 22:30:00	0.13514	15.2
2014-05-10 23:00:00	0.13514	14.8
2014-05-10 23:30:00	0.134704	14.5
2014-05-11	0.134704	14.1
2014-05-11 00:30:00	0.134269	13.7
2014-05-11 01:00:00	0.134269	13.3
2014-05-11 01:30:00	0.133833	12.9
2014-05-11 02:00:00	0.133833	12.5
2014-05-11 02:30:00	0.133833	12.2
2014-05-11 03:00:00	0.133833	11.9
2014-05-11 03:30:00	0.133833	11.6
2014-05-11 04:00:00	0.133397	11.4
2014-05-11 04:30:00	0.133397	11.1
2014-05-11 05:00:00	0.133397	10.8
2014-05-11 05:30:00	0.133397	10.6
2014-05-11 06:00:00	0.13296	10.4
2014-05-11 06:30:00	0.13296	10.1
2014-05-11 07:00:00	0.13296	9.9
2014-05-11 07:30:00	0.13296	9.8
2014-05-11 08:00:00	0.13296	9.8
2014-05-11 08:30:00	0.13296	10
2014-05-11 09:00:00	0.133397	10.4
2014-05-11 09:30:00	0.133833	11.1
2014-05-11 10:00:00	0.134269	11.9
2014-05-11 10:30:00	0.134704	13
2014-05-11 11:00:00	0.13514	14.2
2014-05-11 11:30:00	0.136009	15.5
2014-05-11 12:00:00	0.136877	16.8
2014-05-11 12:30:00	0.137743	18.1
2014-05-11 13:00:00	0.138608	19.2
2014-05-11 13:30:00	0.13904	20.3
2014-05-11 14:00:00	0.139471	21.1
2014-05-11 14:30:00	0.139902	21.8
2014-05-11 15:00:00	0.140333	22.5
2014-05-11 15:30:00	0.140764	23.1
2014-05-11 16:00:00	0.140764	23.5
2014-05-11 16:30:00	0.140764	23.8
2014-05-11 17:00:00	0.140764	23.9
2014-05-11 17:30:00	0.140333	23.8
2014-05-11 18:00:00	0.140333	23.5
2014-05-11 18:30:00	0.139902	23
2014-05-11 19:00:00	0.13904	22.4
2014-05-11 19:30:00	0.13904	21.7
2014-05-11 20:00:00	0.138175	21
2014-05-11 20:30:00	0.137743	20.3
2014-05-11 21:00:00	0.137743	19.6
2014-05-11 21:30:00	0.13731	18.9
2014-05-11 22:00:00	0.136877	18.3
2014-05-11 22:30:00	0.136443	17.7
2014-05-11 23:00:00	0.136009	17.1
2014-05-11 23:30:00	0.135574	16.6
2014-05-12	0.135574	16.1
2014-05-12 00:30:00	0.135574	15.6
2014-05-12 01:00:00	0.13514	15.2
2014-05-12 01:30:00	0.134704	14.8
2014-05-12 02:00:00	0.134704	14.4
2014-05-12 02:30:00	0.134269	14
2014-05-12 03:00:00	0.134269	13.7
2014-05-12 03:30:00	0.134269	13.3
2014-05-12 04:00:00	0.134269	13
2014-05-12 04:30:00	0.134269	12.8
2014-05-12 05:00:00	0.133833	12.5
2014-05-12 05:30:00	0.133833	12.3
2014-05-12 06:00:00	0.133833	12
2014-05-12 06:30:00	0.133833	11.8
2014-05-12 07:00:00	0.133833	11.6
2014-05-12 07:30:00	0.133833	11.5
2014-05-12 08:00:00	0.133833	11.6
2014-05-12 08:30:00	0.133833	11.9
2014-05-12 09:00:00	0.133833	12.4
2014-05-12 09:30:00	0.134269	13
2014-05-12 10:00:00	0.134704	13.8
2014-05-12 10:30:00	0.13514	14.7
2014-05-12 11:00:00	0.135574	15.7
2014-05-12 11:30:00	0.136443	16.8
2014-05-12 12:00:00	0.136877	17.9
2014-05-12 12:30:00	0.137743	19
2014-05-12 13:00:00	0.138175	20.1
2014-05-12 13:30:00	0.13904	21.1
2014-05-12 14:00:00	0.139471	21.9
2014-05-12 14:30:00	0.139902	22.6
2014-05-12 15:00:00	0.140333	23.4
2014-05-12 15:30:00	0.140333	24
2014-05-12 16:00:00	0.140764	24.4
2014-05-12 16:30:00	0.140764	24.6
2014-05-12 17:00:00	0.140333	24.8
2014-05-12 17:30:00	0.140333	24.7
2014-05-12 18:00:00	0.139902	24.5
2014-05-12 18:30:00	0.139471	24.1
2014-05-12 19:00:00	0.139471	23.6
2014-05-12 19:30:00	0.13904	23.1
2014-05-12 20:00:00	0.13904	22.6
2014-05-12 20:30:00	0.138608	22.1
2014-05-12 21:00:00	0.138175	21.5
2014-05-12 21:30:00	0.137743	21
2014-05-12 22:00:00	0.137743	20.5
2014-05-12 22:30:00	0.13731	20
2014-05-12 23:00:00	0.13731	19.6
2014-05-12 23:30:00	0.136877	19.3
2014-05-13	0.136877	18.9
2014-05-13 00:30:00	0.136877	18.6
2014-05-13 01:00:00	0.136443	18.3
2014-05-13 01:30:00	0.136443	18
2014-05-13 02:00:00	0.136443	17.8
2014-05-13 02:30:00	0.136009	17.6
2014-05-13 03:00:00	0.136009	17.4
2014-05-13 03:30:00	0.136009	17.2
2014-05-13 04:00:00	0.136009	17
2014-05-13 04:30:00	0.135574	16.8
2014-05-13 05:00:00	0.135574	16.6
2014-05-13 05:30:00	0.135574	16.4
2014-05-13 06:00:00	0.135574	16.3
2014-05-13 06:30:00	0.135574	16
2014-05-13 07:00:00	0.13514	15.8
2014-05-13 07:30:00	0.13514	15.7
2014-05-13 08:00:00	0.13514	15.5
2014-05-13 08:30:00	0.13514	15.6
2014-05-13 09:00:00	0.13514	15.6
2014-05-13 09:30:00	0.13514	15.9
2014-05-13 10:00:00	0.13514	16.1
2014-05-13 10:30:00	0.135574	16.5
2014-05-13 11:00:00	0.135574	17
2014-05-13 11:30:00	0.136009	17.6
2014-05-13 12:00:00	0.136443	18.3
2014-05-13 12:30:00	0.136877	19.2
2014-05-13 13:00:00	0.13731	20.1
2014-05-13 13:30:00	0.137743	21
2014-05-13 14:00:00	0.138175	21.8
2014-05-13 14:30:00	0.138608	22.4
2014-05-13 15:00:00	0.13904	23
2014-05-13 15:30:00	0.13904	23.5
2014-05-13 16:00:00	0.13904	23.9
2014-05-13 16:30:00	0.13904	24.1
2014-05-13 17:00:00	0.13904	24.2
2014-05-13 17:30:00	0.13904	24.1
2014-05-13 18:00:00	0.138608	23.9
2014-05-13 18:30:00	0.138608	23.5
2014-05-13 19:00:00	0.138175	23.1
2014-05-13 19:30:00	0.137743	22.6
2014-05-13 20:00:00	0.13731	22
2014-05-13 20:30:00	0.136877	21.5
2014-05-13 21:00:00	0.136443	20.9
2014-05-13 21:30:00	0.136443	20.4
2014-05-13 22:00:00	0.136009	19.8
2014-05-13 22:30:00	0.135574	19.4
2014-05-13 23:00:00	0.135574	18.9
2014-05-13 23:30:00	0.13514	18.6
2014-05-14	0.13514	18.2
2014-05-14 00:30:00	0.134704	17.9
2014-05-14 01:00:00	0.134704	17.5
2014-05-14 01:30:00	0.134269	17.2
2014-05-14 02:00:00	0.134269	16.9
2014-05-14 02:30:00	0.134269	16.6
2014-05-14 03:00:00	0.133833	16.4
2014-05-14 03:30:00	0.133833	16.1
2014-05-14 04:00:00	0.133833	15.8
2014-05-14 04:30:00	0.133833	15.6
2014-05-14 05:00:00	0.133833	15.4
2014-05-14 05:30:00	0.133833	15.2
2014-05-14 06:00:00	0.133397	15.1
2014-05-14 06:30:00	0.133397	15
2014-05-14 07:00:00	0.133397	14.8
2014-05-14 07:30:00	0.133397	14.7
2014-05-14 08:00:00	0.133397	14.7
2014-05-14 08:30:00	0.133397	14.7
2014-05-14 09:00:00	0.133397	14.7
2014-05-14 09:30:00	0.133397	14.9
2014-05-14 10:00:00	0.133397	15.1
2014-05-14 10:30:00	0.133833	15.3
2014-05-14 11:00:00	0.133833	15.6
2014-05-14 11:30:00	0.133833	15.9
2014-05-14 12:00:00	0.133833	16.1
2014-05-14 12:30:00	0.133833	16.4
2014-05-14 13:00:00	0.134269	16.8
2014-05-14 13:30:00	0.134269	17.2
2014-05-14 14:00:00	0.134704	17.7
2014-05-14 14:30:00	0.134704	18.2
2014-05-14 15:00:00	0.13514	18.7
2014-05-14 15:30:00	0.135574	19.2
2014-05-14 16:00:00	0.135574	19.7
2014-05-14 16:30:00	0.135574	19.9
2014-05-14 17:00:00	0.136009	20
2014-05-14 17:30:00	0.136009	20.1
2014-05-14 18:00:00	0.135574	20.1
2014-05-14 18:30:00	0.135574	19.9
2014-05-14 19:00:00	0.13514	19.7
2014-05-14 19:30:00	0.13514	19.3
2014-05-14 20:00:00	0.134704	18.9
2014-05-14 20:30:00	0.134269	18.5
2014-05-14 21:00:00	0.133833	18
2014-05-14 21:30:00	0.133833	17.5
2014-05-14 22:00:00	0.133397	17
2014-05-14 22:30:00	0.13296	16.5
2014-05-14 23:00:00	0.13296	16.1
2014-05-14 23:30:00	0.13296	15.6
2014-05-15	0.132523	15.3
2014-05-15 00:30:00	0.132523	15
2014-05-15 01:00:00	0.132086	14.7
2014-05-15 01:30:00	0.132086	14.5
2014-05-15 02:00:00	0.132086	14.2
2014-05-15 02:30:00	0.131648	14
2014-05-15 03:00:00	0.131648	13.8
2014-05-15 03:30:00	0.131648	13.6
2014-05-15 04:00:00	0.131648	13.4
2014-05-15 04:30:00	0.131648	13.2
2014-05-15 05:00:00	0.13121	13
2014-05-15 05:30:00	0.13121	12.8
2014-05-15 06:00:00	0.13121	12.6
2014-05-15 06:30:00	0.13121	12.4
2014-05-15 07:00:00	0.13121	12.2
2014-05-15 07:30:00	0.13121	12.1
2014-05-15 08:00:00	0.13121	12.1
2014-05-15 08:30:00	0.13121	12.3
2014-05-15 09:00:00	0.13121	12.6
2014-05-15 09:30:00	0.131648	13.1
2014-05-15 10:00:00	0.131648	13.7
2014-05-15 10:30:00	0.132086	14.5
2014-05-15 11:00:00	0.132523	15.3
2014-05-15 11:30:00	0.13296	16.2
2014-05-15 12:00:00	0.133397	17.2
2014-05-15 12:30:00	0.133833	18.1
2014-05-15 13:00:00	0.134704	19
2014-05-15 13:30:00	0.13514	20
2014-05-15 14:00:00	0.135574	20.7
2014-05-15 14:30:00	0.135574	21.3
2014-05-15 15:00:00	0.136009	21.9
2014-05-15 15:30:00	0.136443	22.5
2014-05-15 16:00:00	0.136443	23
2014-05-15 16:30:00	0.136443	23.3
2014-05-15 17:00:00	0.136443	23.6
2014-05-15 17:30:00	0.136443	23.7
2014-05-15 18:00:00	0.136443	23.6
2014-05-15 18:30:00	0.136009	23.4
2014-05-15 19:00:00	0.136009	23
2014-05-15 19:30:00	0.135574	22.5
2014-05-15 20:00:00	0.13514	21.9
2014-05-15 20:30:00	0.134704	21.3
2014-05-15 21:00:00	0.134269	20.7
2014-05-15 21:30:00	0.133833	20.1
2014-05-15 22:00:00	0.133397	19.5
2014-05-15 22:30:00	0.133397	19
2014-05-15 23:00:00	0.13296	18.5
2014-05-15 23:30:00	0.132523	18.1
2014-05-16	0.132523	17.7
2014-05-16 00:30:00	0.132086	17.3
2014-05-16 01:00:00	0.132086	16.9
2014-05-16 01:30:00	0.131648	16.6
2014-05-16 02:00:00	0.131648	16.3
2014-05-16 02:30:00	0.131648	16.1
2014-05-16 03:00:00	0.13121	15.8
2014-05-16 03:30:00	0.13121	15.6
2014-05-16 04:00:00	0.13121	15.4
2014-05-16 04:30:00	0.13121	15.2
2014-05-16 05:00:00	0.130772	15
2014-05-16 05:30:00	0.130772	14.8
2014-05-16 06:00:00	0.130772	14.6
2014-05-16 06:30:00	0.130772	14.4
2014-05-16 07:00:00	0.130333	14.2
2014-05-16 07:30:00	0.130333	14
2014-05-16 08:00:00	0.130333	14
2014-05-16 08:30:00	0.130333	14.2
2014-05-16 09:00:00	0.130772	14.6
2014-05-16 09:30:00	0.130772	15.2
2014-05-16 10:00:00	0.13121	15.9
2014-05-16 10:30:00	0.131648	16.7
2014-05-16 11:00:00	0.132086	17.5
2014-05-16 11:30:00	0.132523	18.3
2014-05-16 12:00:00	0.13296	19.3
2014-05-16 12:30:00	0.133397	20.2
2014-05-16 13:00:00	0.133833	21.2
2014-05-16 13:30:00	0.134269	22.1
2014-05-16 14:00:00	0.134704	22.8
2014-05-16 14:30:00	0.134704	23.5
2014-05-16 15:00:00	0.13514	24
2014-05-16 15:30:00	0.13514	24.5
2014-05-16 16:00:00	0.13514	24.7
2014-05-16 16:30:00	0.13514	24.5
2014-05-16 17:00:00	0.134704	24.3
2014-05-16 17:30:00	0.134269	24
2014-05-16 18:00:00	0.134269	23.7
2014-05-16 18:30:00	0.133833	23.5
2014-05-16 19:00:00	0.133833	23.2
2014-05-16 19:30:00	0.133833	22.9
2014-05-16 20:00:00	0.133397	22.4
2014-05-16 20:30:00	0.13296	22
2014-05-16 21:00:00	0.13296	21.4
2014-05-16 21:30:00	0.132523	20.9
2014-05-16 22:00:00	0.132086	20.4
2014-05-16 22:30:00	0.131648	20
2014-05-16 23:00:00	0.131648	19.6
2014-05-16 23:30:00	0.131648	19.2
2014-05-17	0.13121	18.9
2014-05-17 00:30:00	0.13121	18.6
2014-05-17 01:00:00	0.130772	18.4
2014-05-17 01:30:00	0.130772	18.1
2014-05-17 02:00:00	0.130772	17.9
2014-05-17 02:30:00	0.130333	17.6
2014-05-17 03:00:00	0.130333	17.4
2014-05-17 03:30:00	0.129894	17.2
2014-05-17 04:00:00	0.129894	17
2014-05-17 04:30:00	0.129894	16.8
2014-05-17 05:00:00	0.129454	16.5
2014-05-17 05:30:00	0.129454	16.3
2014-05-17 06:00:00	0.129454	16.1
2014-05-17 06:30:00	0.129454	15.9
2014-05-17 07:00:00	0.129454	15.7
2014-05-17 07:30:00	0.129454	15.6
2014-05-17 08:00:00	0.129454	15.5
2014-05-17 08:30:00	0.129454	15.6
2014-05-17 09:00:00	0.129454	15.9
2014-05-17 09:30:00	0.129454	16.2
2014-05-17 10:00:00	0.129454	16.6
2014-05-17 10:30:00	0.129894	17.2
2014-05-17 11:00:00	0.130333	17.9
2014-05-17 11:30:00	0.130772	18.6
2014-05-17 12:00:00	0.130772	19.1
2014-05-17 12:30:00	0.13121	19.6
2014-05-17 13:00:00	0.13121	20.2
2014-05-17 13:30:00	0.131648	20.9
2014-05-17 14:00:00	0.131648	21.3
2014-05-17 14:30:00	0.132086	21.8
2014-05-17 15:00:00	0.132086	22.2
2014-05-17 15:30:00	0.132086	22.6
2014-05-17 16:00:00	0.132086	22.9
2014-05-17 16:30:00	0.132523	23.1
2014-05-17 17:00:00	0.132523	23.3
2014-05-17 17:30:00	0.132523	23.3
2014-05-17 18:00:00	0.132086	23.2
2014-05-17 18:30:00	0.132086	22.9
2014-05-17 19:00:00	0.131648	22.6
2014-05-17 19:30:00	0.131648	22.3
2014-05-17 20:00:00	0.13121	21.9
2014-05-17 20:30:00	0.13121	21.5
2014-05-17 21:00:00	0.130772	21.1
2014-05-17 21:30:00	0.130333	20.7
2014-05-17 22:00:00	0.130333	20.3
2014-05-17 22:30:00	0.129894	20
2014-05-17 23:00:00	0.129894	19.7
2014-05-17 23:30:00	0.129454	19.3
2014-05-18	0.129454	19
2014-05-18 00:30:00	0.129454	18.7
2014-05-18 01:00:00	0.129014	18.4
2014-05-18 01:30:00	0.129014	18.1
2014-05-18 02:00:00	0.128574	17.9
2014-05-18 02:30:00	0.128574	17.7
2014-05-18 03:00:00	0.128574	17.4
2014-05-18 03:30:00	0.128134	17.2
2014-05-18 04:00:00	0.128134	17
2014-05-18 04:30:00	0.128134	16.8
2014-05-18 05:00:00	0.128134	16.6
2014-05-18 05:30:00	0.127693	16.4
2014-05-18 06:00:00	0.127693	16.2
2014-05-18 06:30:00	0.127693	16
2014-05-18 07:00:00	0.127693	15.8
2014-05-18 07:30:00	0.127693	15.7
2014-05-18 08:00:00	0.127693	15.7
2014-05-18 08:30:00	0.127693	15.8
2014-05-18 09:00:00	0.127693	16.1
2014-05-18 09:30:00	0.127693	16.5
2014-05-18 10:00:00	0.128134	17
2014-05-18 10:30:00	0.128574	17.6
2014-05-18 11:00:00	0.129014	18.3
2014-05-18 11:30:00	0.129014	19.1
2014-05-18 12:00:00	0.129454	19.9
2014-05-18 12:30:00	0.130333	20.8
2014-05-18 13:00:00	0.130772	21.7
2014-05-18 13:30:00	0.130772	22.4
2014-05-18 14:00:00	0.13121	23
2014-05-18 14:30:00	0.13121	23.4
2014-05-18 15:00:00	0.13121	23.6
2014-05-18 15:30:00	0.13121	23.8
2014-05-18 16:00:00	0.13121	24
2014-05-18 16:30:00	0.13121	24.1
2014-05-18 17:00:00	0.130772	24.1
2014-05-18 17:30:00	0.130772	23.8
2014-05-18 18:00:00	0.130772	23.5
2014-05-18 18:30:00	0.130333	23.1
2014-05-18 19:00:00	0.129894	22.7
2014-05-18 19:30:00	0.129894	22.3
2014-05-18 20:00:00	0.129454	21.9
2014-05-18 20:30:00	0.129454	21.5
2014-05-18 21:00:00	0.129014	21.2
2014-05-18 21:30:00	0.129014	20.8
2014-05-18 22:00:00	0.128574	20.4
2014-05-18 22:30:00	0.128574	20.1
2014-05-18 23:00:00	0.128574	19.8
2014-05-18 23:30:00	0.128134	19.5
2014-05-19	0.128134	19.3
2014-05-19 00:30:00	0.127693	19
2014-05-19 01:00:00	0.127693	18.8
2014-05-19 01:30:00	0.127693	18.6
2014-05-19 02:00:00	0.127693	18.4
2014-05-19 02:30:00	0.127251	18.2
2014-05-19 03:00:00	0.127251	18.1
2014-05-19 03:30:00	0.127251	17.9
2014-05-19 04:00:00	0.127251	17.6
2014-05-19 04:30:00	0.126809	17.4
2014-05-19 05:00:00	0.126809	17.1
2014-05-19 05:30:00	0.126809	16.9
2014-05-19 06:00:00	0.126367	16.6
2014-05-19 06:30:00	0.126367	16.4
2014-05-19 07:00:00	0.126367	16.1
2014-05-19 07:30:00	0.126367	16
2014-05-19 08:00:00	0.126367	15.9
2014-05-19 08:30:00	0.126367	15.9
2014-05-19 09:00:00	0.126367	16.1
2014-05-19 09:30:00	0.126809	16.5
2014-05-19 10:00:00	0.126809	17
2014-05-19 10:30:00	0.127251	17.6
2014-05-19 11:00:00	0.127693	18.4
2014-05-19 11:30:00	0.128134	19.2
2014-05-19 12:00:00	0.128574	20.1
2014-05-19 12:30:00	0.129014	21.1
2014-05-19 13:00:00	0.129454	22
2014-05-19 13:30:00	0.130333	22.9
2014-05-19 14:00:00	0.130333	23.7
2014-05-19 14:30:00	0.130772	24.4
2014-05-19 15:00:00	0.13121	25.1
2014-05-19 15:30:00	0.13121	25.6
2014-05-19 16:00:00	0.131648	26
2014-05-19 16:30:00	0.13121	26.2
2014-05-19 17:00:00	0.13121	26.4
2014-05-19 17:30:00	0.13121	26.4
2014-05-19 18:00:00	0.13121	26.3
2014-05-19 18:30:00	0.130772	26
2014-05-19 19:00:00	0.130333	25.5
2014-05-19 19:30:00	0.129894	25
2014-05-19 20:00:00	0.129454	24.5
2014-05-19 20:30:00	0.129454	23.9
2014-05-19 21:00:00	0.129014	23.3
2014-05-19 21:30:00	0.128574	22.7
2014-05-19 22:00:00	0.128574	22.1
2014-05-19 22:30:00	0.128134	21.5
2014-05-19 23:00:00	0.127693	21
2014-05-19 23:30:00	0.127251	20.5
2014-05-20	0.126809	20
2014-05-20 00:30:00	0.126809	19.6
2014-05-20 01:00:00	0.126367	19.2
2014-05-20 01:30:00	0.126367	18.8
2014-05-20 02:00:00	0.125925	18.5
2014-05-20 02:30:00	0.125925	18.2
2014-05-20 03:00:00	0.125482	18
2014-05-20 03:30:00	0.125482	17.8
2014-05-20 04:00:00	0.125482	17.6
2014-05-20 04:30:00	0.125482	17.4
2014-05-20 05:00:00	0.125482	17.1
2014-05-20 05:30:00	0.125039	16.9
2014-05-20 06:00:00	0.125039	16.8
2014-05-20 06:30:00	0.125039	16.7
2014-05-20 07:00:00	0.125039	16.5
2014-05-20 07:30:00	0.125039	16.5
2014-05-20 08:00:00	0.125039	16.5
2014-05-20 08:30:00	0.125039	16.7
2014-05-20 09:00:00	0.125482	17
2014-05-20 09:30:00	0.125482	17.4
2014-05-20 10:00:00	0.125925	18
2014-05-20 10:30:00	0.126367	18.7
2014-05-20 11:00:00	0.126809	19.4
2014-05-20 11:30:00	0.126809	20.3
2014-05-20 12:00:00	0.127693	21.1
2014-05-20 12:30:00	0.128134	22.1
2014-05-20 13:00:00	0.128574	23
2014-05-20 13:30:00	0.128574	23.8
2014-05-20 14:00:00	0.129014	24.6
2014-05-20 14:30:00	0.129454	25.2
2014-05-20 15:00:00	0.129454	25.8
2014-05-20 15:30:00	0.129894	26.2
2014-05-20 16:00:00	0.129894	26.6
2014-05-20 16:30:00	0.129894	26.8
2014-05-20 17:00:00	0.129454	26.9
2014-05-20 17:30:00	0.129454	26.9
2014-05-20 18:00:00	0.129014	26.7
2014-05-20 18:30:00	0.129014	26.4
2014-05-20 19:00:00	0.128574	26
2014-05-20 19:30:00	0.128134	25.5
2014-05-20 20:00:00	0.127693	25
2014-05-20 20:30:00	0.127251	24.5
2014-05-20 21:00:00	0.126809	24
2014-05-20 21:30:00	0.126809	23.5
2014-05-20 22:00:00	0.126367	23
2014-05-20 22:30:00	0.126367	22.6
2014-05-20 23:00:00	0.125925	22.2
2014-05-20 23:30:00	0.125925	21.9
2014-05-21	0.125482	21.5
2014-05-21 00:30:00	0.125482	21.2
2014-05-21 01:00:00	0.125039	20.9
2014-05-21 01:30:00	0.125039	20.7
2014-05-21 02:00:00	0.124595	20.4
2014-05-21 02:30:00	0.124595	20.2
2014-05-21 03:00:00	0.124595	19.9
2014-05-21 03:30:00	0.124151	19.7
2014-05-21 04:00:00	0.124151	19.5
2014-05-21 04:30:00	0.124151	19.2
2014-05-21 05:00:00	0.124151	19.1
2014-05-21 05:30:00	0.124151	18.8
2014-05-21 06:00:00	0.123707	18.6
2014-05-21 06:30:00	0.123707	18.3
2014-05-21 07:00:00	0.123707	18
2014-05-21 07:30:00	0.123262	17.8
2014-05-21 08:00:00	0.123262	17.8
2014-05-21 08:30:00	0.123262	17.9
2014-05-21 09:00:00	0.123707	18.2
2014-05-21 09:30:00	0.123707	18.6
2014-05-21 10:00:00	0.124151	19.1
2014-05-21 10:30:00	0.124595	19.7
2014-05-21 11:00:00	0.124595	20.3
2014-05-21 11:30:00	0.125039	21
2014-05-21 12:00:00	0.125482	21.7
2014-05-21 12:30:00	0.125925	22.4
2014-05-21 13:00:00	0.125925	23.1
2014-05-21 13:30:00	0.126367	23.8
2014-05-21 14:00:00	0.126367	24.4
2014-05-21 14:30:00	0.126809	25
2014-05-21 15:00:00	0.126809	25.5
2014-05-21 15:30:00	0.127251	26
2014-05-21 16:00:00	0.127251	26.3
2014-05-21 16:30:00	0.127251	26.5
2014-05-21 17:00:00	0.126809	26.7
2014-05-21 17:30:00	0.126809	26.7
2014-05-21 18:00:00	0.126367	26.6
2014-05-21 18:30:00	0.126367	26.4
2014-05-21 19:00:00	0.125925	26.1
2014-05-21 19:30:00	0.125482	25.6
2014-05-21 20:00:00	0.125482	25.2
2014-05-21 20:30:00	0.125039	24.7
2014-05-21 21:00:00	0.124595	24.3
2014-05-21 21:30:00	0.124151	23.8
2014-05-21 22:00:00	0.124151	23.4
2014-05-21 22:30:00	0.123707	23
2014-05-21 23:00:00	0.123707	22.6
2014-05-21 23:30:00	0.123262	22.3
2014-05-22	0.123262	22
2014-05-22 00:30:00	0.123262	21.6
2014-05-22 01:00:00	0.122817	21.3
2014-05-22 01:30:00	0.122817	21
2014-05-22 02:00:00	0.122372	20.8
2014-05-22 02:30:00	0.122372	20.5
2014-05-22 03:00:00	0.122372	20.2
2014-05-22 03:30:00	0.121926	20
2014-05-22 04:00:00	0.121926	19.8
2014-05-22 04:30:00	0.121926	19.6
2014-05-22 05:00:00	0.121926	19.4
2014-05-22 05:30:00	0.121926	19.2
2014-05-22 06:00:00	0.12148	19.1
2014-05-22 06:30:00	0.12148	18.9
2014-05-22 07:00:00	0.12148	18.7
2014-05-22 07:30:00	0.12148	18.6
2014-05-22 08:00:00	0.12148	18.6
2014-05-22 08:30:00	0.12148	18.7
2014-05-22 09:00:00	0.121926	18.9
2014-05-22 09:30:00	0.121926	19.2
2014-05-22 10:00:00	0.121926	19.6
2014-05-22 10:30:00	0.122372	20.2
2014-05-22 11:00:00	0.122817	20.8
2014-05-22 11:30:00	0.122817	21.4
2014-05-22 12:00:00	0.123262	22.1
2014-05-22 12:30:00	0.123707	22.7
2014-05-22 13:00:00	0.123707	23.3
2014-05-22 13:30:00	0.124151	23.8
2014-05-22 14:00:00	0.124151	24.2
2014-05-22 14:30:00	0.124151	24.6
2014-05-22 15:00:00	0.124151	24.9
2014-05-22 15:30:00	0.124151	25.1
2014-05-22 16:00:00	0.124595	25.4
2014-05-22 16:30:00	0.124151	25.5
2014-05-22 17:00:00	0.124151	25.6
2014-05-22 17:30:00	0.124151	25.6
2014-05-22 18:00:00	0.124151	25.5
2014-05-22 18:30:00	0.123707	25.3
2014-05-22 19:00:00	0.123707	25
2014-05-22 19:30:00	0.123262	24.7
2014-05-22 20:00:00	0.123262	24.4
2014-05-22 20:30:00	0.122817	24.1
2014-05-22 21:00:00	0.122817	23.7
2014-05-22 21:30:00	0.122372	23.4
2014-05-22 22:00:00	0.122372	23.1
2014-05-22 22:30:00	0.121926	22.8
2014-05-22 23:00:00	0.121926	22.5
2014-05-22 23:30:00	0.12148	22.2
2014-05-23	0.12148	22
2014-05-23 00:30:00	0.12148	21.7
2014-05-23 01:00:00	0.121034	21.5
2014-05-23 01:30:00	0.121034	21.3
2014-05-23 02:00:00	0.121034	21.1
2014-05-23 02:30:00	0.121034	20.8
2014-05-23 03:00:00	0.120587	20.6
2014-05-23 03:30:00	0.120587	20.4
2014-05-23 04:00:00	0.120587	20.2
2014-05-23 04:30:00	0.120587	20
2014-05-23 05:00:00	0.120587	19.8
2014-05-23 05:30:00	0.120587	19.6
2014-05-23 06:00:00	0.120587	19.4
2014-05-23 06:30:00	0.120587	19.2
2014-05-23 07:00:00	0.120139	19.1
2014-05-23 07:30:00	0.120139	18.9
2014-05-23 08:00:00	0.120139	18.8
2014-05-23 08:30:00	0.120139	18.7
2014-05-23 09:00:00	0.120587	18.6
2014-05-23 09:30:00	0.120587	18.5
2014-05-23 10:00:00	0.120587	18.4
2014-05-23 10:30:00	0.120587	18.3
2014-05-23 11:00:00	0.120587	18.2
2014-05-23 11:30:00	0.120587	18.2
2014-05-23 12:00:00	0.120139	18.2
2014-05-23 12:30:00	0.120139	18.2
2014-05-23 13:00:00	0.120587	18.1
2014-05-23 13:30:00	0.120587	18.2
2014-05-23 14:00:00	0.120587	18.2
2014-05-23 14:30:00	0.120587	18.2
2014-05-23 15:00:00	0.120587	18.2
2014-05-23 15:30:00	0.120587	18.3
2014-05-23 16:00:00	0.120587	18.4
2014-05-23 16:30:00	0.120587	18.4
2014-05-23 17:00:00	0.120587	18.5
2014-05-23 17:30:00	0.121034	18.8
2014-05-23 18:00:00	0.121034	19
2014-05-23 18:30:00	0.121034	19.1
2014-05-23 19:00:00	0.121034	19
2014-05-23 19:30:00	0.121034	18.9
2014-05-23 20:00:00	0.120587	18.8
2014-05-23 20:30:00	0.120587	18.6
2014-05-23 21:00:00	0.120587	18.3
2014-05-23 21:30:00	0.120139	18.1
2014-05-23 22:00:00	0.120139	17.8
2014-05-23 22:30:00	0.120139	17.6
2014-05-23 23:00:00	0.119692	17.4
2014-05-23 23:30:00	0.119692	17.1
2014-05-24	0.119692	16.9
2014-05-24 00:30:00	0.119692	16.6
2014-05-24 01:00:00	0.119244	16.4
2014-05-24 01:30:00	0.119244	16.2
2014-05-24 02:00:00	0.119244	16
2014-05-24 02:30:00	0.119244	15.8
2014-05-24 03:00:00	0.119244	15.6
2014-05-24 03:30:00	0.119244	15.4
2014-05-24 04:00:00	0.119244	15.2
2014-05-24 04:30:00	0.118795	15
2014-05-24 05:00:00	0.118795	14.7
2014-05-24 05:30:00	0.118795	14.5
2014-05-24 06:00:00	0.118795	14.3
2014-05-24 06:30:00	0.118795	14.1
2014-05-24 07:00:00	0.118795	14
2014-05-24 07:30:00	0.118795	13.9
2014-05-24 08:00:00	0.118795	14
2014-05-24 08:30:00	0.119244	14.3
2014-05-24 09:00:00	0.119244	14.7
2014-05-24 09:30:00	0.119692	15.2
2014-05-24 10:00:00	0.120139	15.7
2014-05-24 10:30:00	0.120139	16.2
2014-05-24 11:00:00	0.120139	16.6
2014-05-24 11:30:00	0.120587	16.9
2014-05-24 12:00:00	0.120587	17.3
2014-05-24 12:30:00	0.121034	17.8
2014-05-24 13:00:00	0.12148	18.5
2014-05-24 13:30:00	0.12148	19.2
2014-05-24 14:00:00	0.121926	19.6
2014-05-24 14:30:00	0.121926	19.7
2014-05-24 15:00:00	0.121926	19.9
2014-05-24 15:30:00	0.121926	20.3
2014-05-24 16:00:00	0.121926	20.5
2014-05-24 16:30:00	0.121926	20.5
2014-05-24 17:00:00	0.121926	20.5
2014-05-24 17:30:00	0.121926	20.4
2014-05-24 18:00:00	0.121926	20.2
2014-05-24 18:30:00	0.12148	19.9
2014-05-24 19:00:00	0.12148	19.6
2014-05-24 19:30:00	0.12148	19.3
2014-05-24 20:00:00	0.12148	19
2014-05-24 20:30:00	0.121034	18.7
2014-05-24 21:00:00	0.121034	18.4
2014-05-24 21:30:00	0.120587	18.1
2014-05-24 22:00:00	0.120587	17.9
2014-05-24 22:30:00	0.120587	17.6
2014-05-24 23:00:00	0.120139	17.4
2014-05-24 23:30:00	0.120139	17.1
2014-05-25	0.120139	16.9
2014-05-25 00:30:00	0.120139	16.7
2014-05-25 01:00:00	0.119692	16.5
2014-05-25 01:30:00	0.119692	16.3
2014-05-25 02:00:00	0.119692	16.1
2014-05-25 02:30:00	0.119692	15.9
2014-05-25 03:00:00	0.119692	15.8
2014-05-25 03:30:00	0.119692	15.7
2014-05-25 04:00:00	0.119692	15.5
2014-05-25 04:30:00	0.119692	15.4
2014-05-25 05:00:00	0.119692	15.2
2014-05-25 05:30:00	0.119244	15
2014-05-25 06:00:00	0.119244	14.9
2014-05-25 06:30:00	0.119244	14.7
2014-05-25 07:00:00	0.119244	14.6
2014-05-25 07:30:00	0.119244	14.4
2014-05-25 08:00:00	0.119244	14.4
2014-05-25 08:30:00	0.119244	14.5
2014-05-25 09:00:00	0.119244	14.8
2014-05-25 09:30:00	0.119692	15.2
2014-05-25 10:00:00	0.120139	15.8
2014-05-25 10:30:00	0.120587	16.6
2014-05-25 11:00:00	0.121034	17.5
2014-05-25 11:30:00	0.12148	18.4
2014-05-25 12:00:00	0.121926	19.4
2014-05-25 12:30:00	0.122372	20.3
2014-05-25 13:00:00	0.122817	21.2
2014-05-25 13:30:00	0.123262	22
2014-05-25 14:00:00	0.123707	22.7
2014-05-25 14:30:00	0.123707	23.4
2014-05-25 15:00:00	0.124151	23.9
2014-05-25 15:30:00	0.124151	24.2
2014-05-25 16:00:00	0.124151	24.6
2014-05-25 16:30:00	0.124151	24.9
2014-05-25 17:00:00	0.124151	25
2014-05-25 17:30:00	0.124151	24.9
2014-05-25 18:00:00	0.124151	24.7
2014-05-25 18:30:00	0.123707	24.4
2014-05-25 19:00:00	0.123707	24.1
2014-05-25 19:30:00	0.123262	23.6
2014-05-25 20:00:00	0.123262	23.1
2014-05-25 20:30:00	0.122817	22.6
2014-05-25 21:00:00	0.122372	22
2014-05-25 21:30:00	0.121926	21.4
2014-05-25 22:00:00	0.121926	20.9
2014-05-25 22:30:00	0.12148	20.3
2014-05-25 23:00:00	0.12148	19.7
2014-05-25 23:30:00	0.121034	19.2
2014-05-26	0.120587	18.7
2014-05-26 00:30:00	0.120587	18.3
2014-05-26 01:00:00	0.120139	17.9
2014-05-26 01:30:00	0.120139	17.5
2014-05-26 02:00:00	0.120139	17.2
2014-05-26 02:30:00	0.119692	16.8
2014-05-26 03:00:00	0.119692	16.5
2014-05-26 03:30:00	0.119692	16.2
2014-05-26 04:00:00	0.119692	15.9
2014-05-26 04:30:00	0.119244	15.6
2014-05-26 05:00:00	0.119244	15.4
2014-05-26 05:30:00	0.119244	15.1
2014-05-26 06:00:00	0.119244	14.9
2014-05-26 06:30:00	0.118795	14.6
2014-05-26 07:00:00	0.118795	14.4
2014-05-26 07:30:00	0.118795	14.2
2014-05-26 08:00:00	0.118795	14.3
2014-05-26 08:30:00	0.119244	14.5
2014-05-26 09:00:00	0.119244	14.9
2014-05-26 09:30:00	0.119692	15.5
2014-05-26 10:00:00	0.119692	16.2
2014-05-26 10:30:00	0.120139	17.1
2014-05-26 11:00:00	0.121034	18
2014-05-26 11:30:00	0.12148	18.8
2014-05-26 12:00:00	0.12148	19.7
2014-05-26 12:30:00	0.122372	20.7
2014-05-26 13:00:00	0.122817	22
2014-05-26 13:30:00	0.123262	22.7
2014-05-26 14:00:00	0.123707	23.5
2014-05-26 14:30:00	0.123707	24.2
2014-05-26 15:00:00	0.124151	24.8
2014-05-26 15:30:00	0.124151	25.3
2014-05-26 16:00:00	0.124151	25.7
2014-05-26 16:30:00	0.124595	26
2014-05-26 17:00:00	0.124151	26.1
2014-05-26 17:30:00	0.124151	26.1
2014-05-26 18:00:00	0.124151	26
2014-05-26 18:30:00	0.123707	25.7
2014-05-26 19:00:00	0.123262	25.3
2014-05-26 19:30:00	0.123262	24.8
2014-05-26 20:00:00	0.122817	24.3
2014-05-26 20:30:00	0.122372	23.8
2014-05-26 21:00:00	0.122372	23.2
2014-05-26 21:30:00	0.121926	22.7
2014-05-26 22:00:00	0.12148	22.2
2014-05-26 22:30:00	0.12148	21.6
2014-05-26 23:00:00	0.121034	21.1
2014-05-26 23:30:00	0.120587	20.7
2014-05-27	0.120587	20.3
2014-05-27 00:30:00	0.120139	19.9
2014-05-27 01:00:00	0.119692	19.5
2014-05-27 01:30:00	0.119692	19.1
2014-05-27 02:00:00	0.119692	18.7
2014-05-27 02:30:00	0.119244	18.4
2014-05-27 03:00:00	0.119244	18.1
2014-05-27 03:30:00	0.118795	17.9
2014-05-27 04:00:00	0.118795	17.6
2014-05-27 04:30:00	0.118795	17.4
2014-05-27 05:00:00	0.118795	17.2
2014-05-27 05:30:00	0.118347	17
2014-05-27 06:00:00	0.118347	16.8
2014-05-27 06:30:00	0.118347	16.6
2014-05-27 07:00:00	0.118347	16.4
2014-05-27 07:30:00	0.118347	16.3
2014-05-27 08:00:00	0.118347	16.3
2014-05-27 08:30:00	0.118347	16.4
2014-05-27 09:00:00	0.118347	16.7
2014-05-27 09:30:00	0.118795	17.1
2014-05-27 10:00:00	0.119244	17.7
2014-05-27 10:30:00	0.119692	18.5
2014-05-27 11:00:00	0.120139	19.4
2014-05-27 11:30:00	0.120587	20.4
2014-05-27 12:00:00	0.121034	21.5
2014-05-27 12:30:00	0.12148	22.5
2014-05-27 13:00:00	0.121926	23.6
2014-05-27 13:30:00	0.122372	24.5
2014-05-27 14:00:00	0.122817	25.4
2014-05-27 14:30:00	0.123262	26.1
2014-05-27 15:00:00	0.123262	26.8
2014-05-27 15:30:00	0.123262	27.4
2014-05-27 16:00:00	0.123262	27.9
2014-05-27 16:30:00	0.123707	28.2
2014-05-27 17:00:00	0.123262	28.3
2014-05-27 17:30:00	0.123262	28.4
2014-05-27 18:00:00	0.122817	28.2
2014-05-27 18:30:00	0.122817	27.9
2014-05-27 19:00:00	0.122372	27.5
2014-05-27 19:30:00	0.121926	27
2014-05-27 20:00:00	0.12148	26.5
2014-05-27 20:30:00	0.121034	25.9
2014-05-27 21:00:00	0.120587	25.4
2014-05-27 21:30:00	0.120139	24.8
2014-05-27 22:00:00	0.119692	24.2
2014-05-27 22:30:00	0.119244	23.6
2014-05-27 23:00:00	0.119244	23.1
2014-05-27 23:30:00	0.118795	22.6
2014-05-28	0.118347	22.1
2014-05-28 00:30:00	0.118347	21.7
2014-05-28 01:00:00	0.117898	21.4
2014-05-28 01:30:00	0.117898	21.1
2014-05-28 02:00:00	0.117448	20.8
2014-05-28 02:30:00	0.117448	20.5
2014-05-28 03:00:00	0.116998	20.2
2014-05-28 03:30:00	0.116998	20
2014-05-28 04:00:00	0.116998	19.7
2014-05-28 04:30:00	0.116998	19.5
2014-05-28 05:00:00	0.116548	19.3
2014-05-28 05:30:00	0.116548	19.1
2014-05-28 06:00:00	0.116548	18.9
2014-05-28 06:30:00	0.116097	18.7
2014-05-28 07:00:00	0.116097	18.5
2014-05-28 07:30:00	0.116097	18.4
2014-05-28 08:00:00	0.116097	18.4
2014-05-28 08:30:00	0.116548	18.5
2014-05-28 09:00:00	0.116548	18.9
2014-05-28 09:30:00	0.116998	19.3
2014-05-28 10:00:00	0.116998	19.8
2014-05-28 10:30:00	0.117448	20.5
2014-05-28 11:00:00	0.117898	21.3
2014-05-28 11:30:00	0.118347	22.2
2014-05-28 12:00:00	0.118795	23.1
2014-05-28 12:30:00	0.118795	24
2014-05-28 13:00:00	0.119244	24.8
2014-05-28 13:30:00	0.119692	25.4
2014-05-28 14:00:00	0.120139	26.1
2014-05-28 14:30:00	0.120139	26.6
2014-05-28 15:00:00	0.120139	27
2014-05-28 15:30:00	0.120139	27.3
2014-05-28 16:00:00	0.120139	27.5
2014-05-28 16:30:00	0.120139	27.7
2014-05-28 17:00:00	0.120139	27.8
2014-05-28 17:30:00	0.119692	27.9
2014-05-28 18:00:00	0.119692	27.9
2014-05-28 18:30:00	0.119692	27.8
2014-05-28 19:00:00	0.119244	27.5
2014-05-28 19:30:00	0.118795	27.2
2014-05-28 20:00:00	0.118347	26.8
2014-05-28 20:30:00	0.118347	26.3
2014-05-28 21:00:00	0.117898	25.8
2014-05-28 21:30:00	0.117448	25.3
2014-05-28 22:00:00	0.116998	24.7
2014-05-28 22:30:00	0.116548	24.1
2014-05-28 23:00:00	0.116097	23.6
2014-05-28 23:30:00	0.116097	23.2
2014-05-29	0.115646	22.8
2014-05-29 00:30:00	0.115646	22.5
2014-05-29 01:00:00	0.115195	22.2
2014-05-29 01:30:00	0.115195	21.9
2014-05-29 02:00:00	0.114743	21.7
2014-05-29 02:30:00	0.114743	21.4
2014-05-29 03:00:00	0.114743	21.2
2014-05-29 03:30:00	0.114291	21
2014-05-29 04:00:00	0.114291	20.8
2014-05-29 04:30:00	0.114291	20.6
2014-05-29 05:00:00	0.114291	20.4
2014-05-29 05:30:00	0.114291	20.2
2014-05-29 06:00:00	0.113839	20
2014-05-29 06:30:00	0.113839	19.8
2014-05-29 07:00:00	0.113839	19.7
2014-05-29 07:30:00	0.113839	19.6
2014-05-29 08:00:00	0.113839	19.5
2014-05-29 08:30:00	0.113839	19.7
2014-05-29 09:00:00	0.114291	19.9
2014-05-29 09:30:00	0.114291	20.4
2014-05-29 10:00:00	0.114743	21
2014-05-29 10:30:00	0.115195	21.7
2014-05-29 11:00:00	0.115646	22.6
2014-05-29 11:30:00	0.116097	23.6
2014-05-29 12:00:00	0.116548	24.6
2014-05-29 12:30:00	0.116998	25.5
2014-05-29 13:00:00	0.117448	26.4
2014-05-29 13:30:00	0.117448	27.3
2014-05-29 14:00:00	0.117898	28
2014-05-29 14:30:00	0.118347	28.6
2014-05-29 15:00:00	0.118347	29
2014-05-29 15:30:00	0.118347	29.4
2014-05-29 16:00:00	0.118347	29.6
2014-05-29 16:30:00	0.118347	29.8
2014-05-29 17:00:00	0.118347	30
2014-05-29 17:30:00	0.117898	30.1
2014-05-29 18:00:00	0.117898	30
2014-05-29 18:30:00	0.117448	29.8
2014-05-29 19:00:00	0.117448	29.5
2014-05-29 19:30:00	0.116998	29
2014-05-29 20:00:00	0.116548	28.6
2014-05-29 20:30:00	0.116097	28
2014-05-29 21:00:00	0.115646	27.5
2014-05-29 21:30:00	0.115195	27
2014-05-29 22:00:00	0.114743	26.4
2014-05-29 22:30:00	0.114291	26
2014-05-29 23:00:00	0.113839	25.6
2014-05-29 23:30:00	0.113839	25.2
2014-05-30	0.113386	24.9
2014-05-30 00:30:00	0.112933	24.6
2014-05-30 01:00:00	0.112933	24.3
2014-05-30 01:30:00	0.112479	24
2014-05-30 02:00:00	0.112479	23.7
2014-05-30 02:30:00	0.112479	23.4
2014-05-30 03:00:00	0.112025	23.2
2014-05-30 03:30:00	0.112025	22.9
2014-05-30 04:00:00	0.112025	22.7
2014-05-30 04:30:00	0.111571	22.5
2014-05-30 05:00:00	0.111571	22.2
2014-05-30 05:30:00	0.111571	22
2014-05-30 06:00:00	0.111571	21.9
2014-05-30 06:30:00	0.111571	21.7
2014-05-30 07:00:00	0.111571	21.6
2014-05-30 07:30:00	0.111116	21.5
2014-05-30 08:00:00	0.111116	21.4
2014-05-30 08:30:00	0.111571	21.4
2014-05-30 09:00:00	0.111571	21.6
2014-05-30 09:30:00	0.111571	21.9
2014-05-30 10:00:00	0.112025	22.2
2014-05-30 10:30:00	0.112025	22.6
2014-05-30 11:00:00	0.112479	23.1
2014-05-30 11:30:00	0.112479	23.7
2014-05-30 12:00:00	0.112933	24.2
2014-05-30 12:30:00	0.112933	24.7
2014-05-30 13:00:00	0.113386	25.2
2014-05-30 13:30:00	0.113386	25.7
2014-05-30 14:00:00	0.113839	26
2014-05-30 14:30:00	0.113839	26.2
2014-05-30 15:00:00	0.113839	26.2
2014-05-30 15:30:00	0.113839	26.2
2014-05-30 16:00:00	0.113386	26.2
2014-05-30 16:30:00	0.113386	26.3
2014-05-30 17:00:00	0.113386	26.4
2014-05-30 17:30:00	0.113386	26.4
2014-05-30 18:00:00	0.113386	26.4
2014-05-30 18:30:00	0.112933	26.2
2014-05-30 19:00:00	0.112933	26
2014-05-30 19:30:00	0.112479	25.8
2014-05-30 20:00:00	0.112025	25.5
2014-05-30 20:30:00	0.112025	25.2
2014-05-30 21:00:00	0.111571	24.9
2014-05-30 21:30:00	0.111571	24.6
2014-05-30 22:00:00	0.111116	24.3
2014-05-30 22:30:00	0.111116	24
2014-05-30 23:00:00	0.110661	23.6
2014-05-30 23:30:00	0.110661	23.3
2014-05-31	0.110206	23
2014-05-31 00:30:00	0.110206	22.7
2014-05-31 01:00:00	0.110206	22.4
2014-05-31 01:30:00	0.10975	22.1
2014-05-31 02:00:00	0.10975	21.8
2014-05-31 02:30:00	0.10975	21.4
2014-05-31 03:00:00	0.109294	21.1
2014-05-31 03:30:00	0.109294	20.9
2014-05-31 04:00:00	0.109294	20.7
2014-05-31 04:30:00	0.109294	20.5
2014-05-31 05:00:00	0.109294	20.3
2014-05-31 05:30:00	0.109294	20.1
2014-05-31 06:00:00	0.109294	19.9
2014-05-31 06:30:00	0.108837	19.8
2014-05-31 07:00:00	0.108837	19.6
2014-05-31 07:30:00	0.108837	19.5
2014-05-31 08:00:00	0.108837	19.4
2014-05-31 08:30:00	0.108837	19.5
2014-05-31 09:00:00	0.109294	19.7
2014-05-31 09:30:00	0.109294	20
2014-05-31 10:00:00	0.10975	20.4
2014-05-31 10:30:00	0.10975	20.9
2014-05-31 11:00:00	0.110206	21.3
2014-05-31 11:30:00	0.110206	21.8
2014-05-31 12:00:00	0.110661	22.4
2014-05-31 12:30:00	0.110661	22.9
2014-05-31 13:00:00	0.111116	23.6
2014-05-31 13:30:00	0.111571	24.4
2014-05-31 14:00:00	0.112025	25.1
2014-05-31 14:30:00	0.112479	25.8
2014-05-31 15:00:00	0.112479	26.3
2014-05-31 15:30:00	0.112479	26.7
2014-05-31 16:00:00	0.112479	26.9
2014-05-31 16:30:00	0.112479	27.1
2014-05-31 17:00:00	0.112479	27.4
2014-05-31 17:30:00	0.112933	27.6
2014-05-31 18:00:00	0.112479	27.6
2014-05-31 18:30:00	0.112479	27.5
2014-05-31 19:00:00	0.112025	27.2
2014-05-31 19:30:00	0.111571	26.8
2014-05-31 20:00:00	0.111571	26.4
2014-05-31 20:30:00	0.111116	26
2014-05-31 21:00:00	0.110661	25.5
2014-05-31 21:30:00	0.110661	25.1
2014-05-31 22:00:00	0.110206	24.7
2014-05-31 22:30:00	0.10975	24.3
2014-05-31 23:00:00	0.10975	24
2014-05-31 23:30:00	0.10975	23.6
2014-06-01	0.109294	23.3
2014-06-01 00:30:00	0.109294	23.1
2014-06-01 01:00:00	0.109294	22.8
2014-06-01 01:30:00	0.108837	22.5
2014-06-01 02:00:00	0.108837	22.2
2014-06-01 02:30:00	0.10838	22
2014-06-01 03:00:00	0.10838	21.7
2014-06-01 03:30:00	0.10838	21.4
2014-06-01 04:00:00	0.107923	21.2
2014-06-01 04:30:00	0.107923	20.9
2014-06-01 05:00:00	0.107923	20.6
2014-06-01 05:30:00	0.107923	20.3
2014-06-01 06:00:00	0.107923	20.1
2014-06-01 06:30:00	0.107465	19.8
2014-06-01 07:00:00	0.107465	19.6
2014-06-01 07:30:00	0.107465	19.4
2014-06-01 08:00:00	0.107923	19.4
2014-06-01 08:30:00	0.107923	19.6
2014-06-01 09:00:00	0.107923	19.9
2014-06-01 09:30:00	0.10838	20.3
2014-06-01 10:00:00	0.108837	20.9
2014-06-01 10:30:00	0.104251	19.6
2014-06-01 11:00:00	0.109294	22.4
2014-06-01 11:30:00	0.10975	23.3
2014-06-01 12:00:00	0.110206	24.2
2014-06-01 12:30:00	0.111116	25.2
2014-06-01 13:00:00	0.111571	26
2014-06-01 13:30:00	0.112025	26.9
2014-06-01 14:00:00	0.112479	27.7
2014-06-01 14:30:00	0.112933	28.3
2014-06-01 15:00:00	0.112933	28.8
2014-06-01 15:30:00	0.113386	29.4
2014-06-01 16:00:00	0.113386	29.8
2014-06-01 16:30:00	0.113386	30.1
2014-06-01 17:00:00	0.112933	30.2
2014-06-01 17:30:00	0.112933	30.1
2014-06-01 18:00:00	0.112479	30
2014-06-01 18:30:00	0.112025	29.7
2014-06-01 19:00:00	0.112025	29.3
2014-06-01 19:30:00	0.111571	28.9
2014-06-01 20:00:00	0.111116	28.4
2014-06-01 20:30:00	0.110661	27.9
2014-06-01 21:00:00	0.110206	27.4
2014-06-01 21:30:00	0.10975	26.9
2014-06-01 22:00:00	0.109294	26.4
2014-06-01 22:30:00	0.109294	26
2014-06-01 23:00:00	0.108837	25.6
2014-06-01 23:30:00	0.10838	25.2
2014-06-02	0.10838	24.9
2014-06-02 00:30:00	0.107923	24.6
2014-06-02 01:00:00	0.107923	24.3
2014-06-02 01:30:00	0.107923	24.1
2014-06-02 02:00:00	0.107465	23.8
2014-06-02 02:30:00	0.107465	23.6
2014-06-02 03:00:00	0.107465	23.4
2014-06-02 03:30:00	0.107465	23.2
2014-06-02 04:00:00	0.107465	22.9
2014-06-02 04:30:00	0.107465	22.7
2014-06-02 05:00:00	0.107465	22.5
2014-06-02 05:30:00	0.107007	22.3
2014-06-02 06:00:00	0.107007	22.1
2014-06-02 06:30:00	0.107007	21.9
2014-06-02 07:00:00	0.107007	21.6
2014-06-02 07:30:00	0.107007	21.5
2014-06-02 08:00:00	0.106549	21.4
2014-06-02 08:30:00	0.107007	21.4
2014-06-02 09:00:00	0.107007	21.4
2014-06-02 09:30:00	0.107007	21.5
2014-06-02 10:00:00	0.107007	21.6
2014-06-02 10:30:00	0.107465	21.9
2014-06-02 11:00:00	0.107465	22.1
2014-06-02 11:30:00	0.107465	22.2
2014-06-02 12:00:00	0.107465	22.4
2014-06-02 12:30:00	0.107465	22.5
2014-06-02 13:00:00	0.107923	22.8
2014-06-02 13:30:00	0.107923	23.2
2014-06-02 14:00:00	0.10838	23.7
2014-06-02 14:30:00	0.10838	24.1
2014-06-02 15:00:00	0.10838	24.5
2014-06-02 15:30:00	0.108837	24.9
2014-06-02 16:00:00	0.108837	25.2
2014-06-02 16:30:00	0.108837	25.5
2014-06-02 17:00:00	0.109294	25.8
2014-06-02 17:30:00	0.109294	26.1
2014-06-02 18:00:00	0.109294	26.2
2014-06-02 18:30:00	0.109294	26.2
2014-06-02 19:00:00	0.109294	26.1
2014-06-02 19:30:00	0.108837	25.8
2014-06-02 20:00:00	0.108837	25.5
2014-06-02 20:30:00	0.10838	25.2
2014-06-02 21:00:00	0.10838	24.8
2014-06-02 21:30:00	0.107923	24.4
2014-06-02 22:00:00	0.107923	24.1
2014-06-02 22:30:00	0.107465	23.7
2014-06-02 23:00:00	0.107465	23.4
2014-06-02 23:30:00	0.107465	23
2014-06-03	0.107007	22.7
2014-06-03 00:30:00	0.107007	22.4
2014-06-03 01:00:00	0.107007	22.1
2014-06-03 01:30:00	0.106549	21.9
2014-06-03 02:00:00	0.106549	21.6
2014-06-03 02:30:00	0.106549	21.4
2014-06-03 03:00:00	0.106549	21.2
2014-06-03 03:30:00	0.106549	21.1
2014-06-03 04:00:00	0.10609	20.9
2014-06-03 04:30:00	0.10609	20.7
2014-06-03 05:00:00	0.10609	20.5
2014-06-03 05:30:00	0.10609	20.4
2014-06-03 06:00:00	0.10609	20.2
2014-06-03 06:30:00	0.10609	20.1
2014-06-03 07:00:00	0.10609	19.9
2014-06-03 07:30:00	0.10609	19.9
2014-06-03 08:00:00	0.10609	19.9
2014-06-03 08:30:00	0.10609	20.1
2014-06-03 09:00:00	0.10609	20.3
2014-06-03 09:30:00	0.106549	20.6
2014-06-03 10:00:00	0.106549	21.1
2014-06-03 10:30:00	0.107007	21.6
2014-06-03 11:00:00	0.107465	22.3
2014-06-03 11:30:00	0.107923	23.1
2014-06-03 12:00:00	0.107923	23.8
2014-06-03 12:30:00	0.10838	24.2
2014-06-03 13:00:00	0.10838	24.5
2014-06-03 13:30:00	0.10838	24.8
2014-06-03 14:00:00	0.10838	24.9
2014-06-03 14:30:00	0.10838	24.9
2014-06-03 15:00:00	0.109294	24.6
2014-06-03 15:30:00	0.116097	23.9
2014-06-03 16:00:00	0.180436	21.9
2014-06-03 16:30:00	0.212198	20.7
2014-06-03 17:00:00	0.22563	19.9
2014-06-03 17:30:00	0.234461	19.3
2014-06-03 18:00:00	0.232359	18.9
2014-06-03 18:30:00	0.228832	18.7
2014-06-03 19:00:00	0.22563	18.6
2014-06-03 19:30:00	0.222763	18.4
2014-06-03 20:00:00	0.220237	18.3
2014-06-03 20:30:00	0.21806	18.1
2014-06-03 21:00:00	0.215871	17.9
2014-06-03 21:30:00	0.214039	17.7
2014-06-03 22:00:00	0.212198	17.5
2014-06-03 22:30:00	0.210719	17.3
2014-06-03 23:00:00	0.209235	17.1
2014-06-03 23:30:00	0.207746	16.9
2014-06-04	0.206626	16.7
2014-06-04 00:30:00	0.205128	16.6
2014-06-04 01:00:00	0.204001	16.4
2014-06-04 01:30:00	0.203248	16.2
2014-06-04 02:00:00	0.202116	16.1
2014-06-04 02:30:00	0.20136	16
2014-06-04 03:00:00	0.200602	15.9
2014-06-04 03:30:00	0.199463	15.7
2014-06-04 04:00:00	0.198703	15.5
2014-06-04 04:30:00	0.197559	15.3
2014-06-04 05:00:00	0.196794	15.2
2014-06-04 05:30:00	0.196412	15
2014-06-04 06:00:00	0.195262	14.8
2014-06-04 06:30:00	0.194878	14.7
2014-06-04 07:00:00	0.194109	14.6
2014-06-04 07:30:00	0.193724	14.7
2014-06-04 08:00:00	0.193339	15
2014-06-04 08:30:00	0.193339	15.6
2014-06-04 09:00:00	0.192953	16.3
2014-06-04 09:30:00	0.192953	17.3
2014-06-04 10:00:00	0.192953	18.3
2014-06-04 10:30:00	0.192953	19.4
2014-06-04 11:00:00	0.192567	20.5
2014-06-04 11:30:00	0.192567	21.5
2014-06-04 12:00:00	0.192567	22.5
2014-06-04 12:30:00	0.192181	23.6
2014-06-04 13:00:00	0.191795	24.6
2014-06-04 13:30:00	0.191795	25.7
2014-06-04 14:00:00	0.191408	26.6
2014-06-04 14:30:00	0.191408	27.5
2014-06-04 15:00:00	0.191408	28.3
2014-06-04 15:30:00	0.19102	29
2014-06-04 16:00:00	0.190633	29.4
2014-06-04 16:30:00	0.189857	29.7
2014-06-04 17:00:00	0.189079	29.7
2014-06-04 17:30:00	0.18791	29.5
2014-06-04 18:00:00	0.186738	29.1
2014-06-04 18:30:00	0.185563	28.4
2014-06-04 19:00:00	0.183992	27.7
2014-06-04 19:30:00	0.18281	26.9
2014-06-04 20:00:00	0.181625	26.1
2014-06-04 20:30:00	0.180436	25.4
2014-06-04 21:00:00	0.179245	24.8
2014-06-04 21:30:00	0.178449	24.1
2014-06-04 22:00:00	0.177652	23.5
2014-06-04 22:30:00	0.176853	23
2014-06-04 23:00:00	0.176053	22.5
2014-06-04 23:30:00	0.175653	22
2014-06-05	0.174851	21.6
2014-06-05 00:30:00	0.174449	21.2
2014-06-05 01:00:00	0.173645	20.9
2014-06-05 01:30:00	0.173243	20.6
2014-06-05 02:00:00	0.17284	20.3
2014-06-05 02:30:00	0.172436	20
2014-06-05 03:00:00	0.171629	19.8
2014-06-05 03:30:00	0.171224	19.5
2014-06-05 04:00:00	0.17082	19.3
2014-06-05 04:30:00	0.170415	19
2014-06-05 05:00:00	0.169604	18.7
2014-06-05 05:30:00	0.169604	18.5
2014-06-05 06:00:00	0.169198	18.3
2014-06-05 06:30:00	0.168791	18.1
2014-06-05 07:00:00	0.168385	18
2014-06-05 07:30:00	0.167978	17.9
2014-06-05 08:00:00	0.16757	17.9
2014-06-05 08:30:00	0.16757	18
2014-06-05 09:00:00	0.167162	18.1
2014-06-05 09:30:00	0.167162	18.4
2014-06-05 10:00:00	0.16757	19.1
2014-06-05 10:30:00	0.16757	19.9
2014-06-05 11:00:00	0.167978	20.6
2014-06-05 11:30:00	0.168791	21.9
2014-06-05 12:00:00	0.169604	23.4
2014-06-05 12:30:00	0.17001	24.8
2014-06-05 13:00:00	0.17082	26.2
2014-06-05 13:30:00	0.171629	27.4
2014-06-05 14:00:00	0.172436	28.5
2014-06-05 14:30:00	0.172436	29.3
2014-06-05 15:00:00	0.17284	30
2014-06-05 15:30:00	0.17284	30.6
2014-06-05 16:00:00	0.17284	30.9
2014-06-05 16:30:00	0.172436	31
2014-06-05 17:00:00	0.172033	30.9
2014-06-05 17:30:00	0.171224	30.7
2014-06-05 18:00:00	0.170415	30.3
2014-06-05 18:30:00	0.169604	29.7
2014-06-05 19:00:00	0.168791	29.1
2014-06-05 19:30:00	0.167978	28.5
2014-06-05 20:00:00	0.167162	27.9
2014-06-05 20:30:00	0.166346	27.2
2014-06-05 21:00:00	0.165528	26.5
2014-06-05 21:30:00	0.164709	25.9
2014-06-05 22:00:00	0.164298	25.3
2014-06-05 22:30:00	0.163888	24.7
2014-06-05 23:00:00	0.163066	24.2
2014-06-05 23:30:00	0.163066	23.8
2014-06-06	0.162654	23.5
2014-06-06 00:30:00	0.162242	23.2
2014-06-06 01:00:00	0.16183	22.9
2014-06-06 01:30:00	0.161417	22.6
2014-06-06 02:00:00	0.161004	22.3
2014-06-06 02:30:00	0.161004	22
2014-06-06 03:00:00	0.160591	21.8
2014-06-06 03:30:00	0.160177	21.5
2014-06-06 04:00:00	0.161004	21.2
2014-06-06 04:30:00	0.161417	20.9
2014-06-06 05:00:00	0.161417	20.5
2014-06-06 05:30:00	0.161004	20
2014-06-06 06:00:00	0.160591	19.6
2014-06-06 06:30:00	0.160591	19.2
2014-06-06 07:00:00	0.160177	18.9
2014-06-06 07:30:00	0.159763	18.3
2014-06-06 08:00:00	0.159763	18.2
2014-06-06 08:30:00	0.160177	18.3
2014-06-06 09:00:00	0.161004	18.9
2014-06-06 09:30:00	0.16183	19.7
2014-06-06 10:00:00	0.163066	20.7
2014-06-06 10:30:00	0.163888	21.7
2014-06-06 11:00:00	0.164709	22.7
2014-06-06 11:30:00	0.165118	23.6
2014-06-06 12:00:00	0.165937	24.7
2014-06-06 12:30:00	0.167162	25.9
2014-06-06 13:00:00	0.167978	27
2014-06-06 13:30:00	0.168791	28
2014-06-06 14:00:00	0.169604	29
2014-06-06 14:30:00	0.17001	29.8
2014-06-06 15:00:00	0.17001	30.2
2014-06-06 15:30:00	0.17001	30.5
2014-06-06 16:00:00	0.169604	30.6
2014-06-06 16:30:00	0.169604	30.6
2014-06-06 17:00:00	0.169198	30.3
2014-06-06 17:30:00	0.167978	29.7
2014-06-06 18:00:00	0.167162	28.9
2014-06-06 18:30:00	0.165937	28
2014-06-06 19:00:00	0.165118	27.2
2014-06-06 19:30:00	0.164298	26.4
2014-06-06 20:00:00	0.163477	25.6
2014-06-06 20:30:00	0.163066	24.8
2014-06-06 21:00:00	0.162242	24.1
2014-06-06 21:30:00	0.16183	23.5
2014-06-06 22:00:00	0.161417	22.9
2014-06-06 22:30:00	0.161004	22.3
2014-06-06 23:00:00	0.160591	21.7
2014-06-06 23:30:00	0.160177	21.2
2014-06-07	0.159763	20.8
2014-06-07 00:30:00	0.159349	20.3
2014-06-07 01:00:00	0.158519	19.8
2014-06-07 01:30:00	0.158519	19.5
2014-06-07 02:00:00	0.158103	19.1
2014-06-07 02:30:00	0.158103	18.8
2014-06-07 03:00:00	0.157687	18.4
2014-06-07 03:30:00	0.157271	18.1
2014-06-07 04:00:00	0.156855	17.8
2014-06-07 04:30:00	0.156438	17.5
2014-06-07 05:00:00	0.156021	17.2
2014-06-07 05:30:00	0.156021	16.9
2014-06-07 06:00:00	0.155603	16.7
2014-06-07 06:30:00	0.155603	16.6
2014-06-07 07:00:00	0.155185	16.7
2014-06-07 07:30:00	0.155603	17
2014-06-07 08:00:00	0.155603	17.5
2014-06-07 08:30:00	0.156021	18.3
2014-06-07 09:00:00	0.156438	19.1
2014-06-07 09:30:00	0.157271	20
2014-06-07 10:00:00	0.157687	21.1
2014-06-07 10:30:00	0.158103	22.3
2014-06-07 11:00:00	0.158934	23.3
2014-06-07 11:30:00	0.158934	24
2014-06-07 12:00:00	0.159349	24.9
2014-06-07 12:30:00	0.159763	25.6
2014-06-07 13:00:00	0.160177	26.2
2014-06-07 13:30:00	0.160177	26.8
2014-06-07 14:00:00	0.160591	27.3
2014-06-07 14:30:00	0.160591	27.7
2014-06-07 15:00:00	0.160591	27.9
2014-06-07 15:30:00	0.160177	27.9
2014-06-07 16:00:00	0.160177	27.9
2014-06-07 16:30:00	0.159763	27.8
2014-06-07 17:00:00	0.159349	27.5
2014-06-07 17:30:00	0.158934	27.2
2014-06-07 18:00:00	0.158103	26.7
2014-06-07 18:30:00	0.158103	26.3
2014-06-07 19:00:00	0.157271	25.8
2014-06-07 19:30:00	0.156855	25.2
2014-06-07 20:00:00	0.156438	24.7
2014-06-07 20:30:00	0.156021	24.2
2014-06-07 21:00:00	0.155603	23.6
2014-06-07 21:30:00	0.155185	23.1
2014-06-07 22:00:00	0.155185	22.7
2014-06-07 22:30:00	0.154767	22.3
2014-06-07 23:00:00	0.154348	21.9
2014-06-07 23:30:00	0.154348	21.6
2014-06-08	0.153929	21.3
2014-06-08 00:30:00	0.15351	21.1
2014-06-08 01:00:00	0.15351	20.8
2014-06-08 01:30:00	0.15309	20.5
2014-06-08 02:00:00	0.15267	20.3
2014-06-08 02:30:00	0.15267	20
2014-06-08 03:00:00	0.15225	19.8
2014-06-08 03:30:00	0.15225	19.5
2014-06-08 04:00:00	0.151829	19.2
2014-06-08 04:30:00	0.151829	18.9
2014-06-08 05:00:00	0.151408	18.6
2014-06-08 05:30:00	0.151408	18.4
2014-06-08 06:00:00	0.150986	18.1
2014-06-08 06:30:00	0.150986	18
2014-06-08 07:00:00	0.150564	18.1
2014-06-08 07:30:00	0.150986	18.4
2014-06-08 08:00:00	0.150986	18.9
2014-06-08 08:30:00	0.151408	19.7
2014-06-08 09:00:00	0.151829	20.6
2014-06-08 09:30:00	0.15267	21.7
2014-06-08 10:00:00	0.15309	22.9
2014-06-08 10:30:00	0.15351	24
2014-06-08 11:00:00	0.154348	25.1
2014-06-08 11:30:00	0.154767	26.2
2014-06-08 12:00:00	0.155185	27.1
2014-06-08 12:30:00	0.156021	28.1
2014-06-08 13:00:00	0.156438	28.9
2014-06-08 13:30:00	0.156855	29.7
2014-06-08 14:00:00	0.157271	30.4
2014-06-08 14:30:00	0.157271	30.9
2014-06-08 15:00:00	0.157271	31.2
2014-06-08 15:30:00	0.156855	31.4
2014-06-08 16:00:00	0.156855	31.5
2014-06-08 16:30:00	0.156438	31.4
2014-06-08 17:00:00	0.156021	31.1
2014-06-08 17:30:00	0.155185	30.6
2014-06-08 18:00:00	0.154767	29.9
2014-06-08 18:30:00	0.153929	29.1
2014-06-08 19:00:00	0.15309	28.3
2014-06-08 19:30:00	0.15225	27.6
2014-06-08 20:00:00	0.151829	26.9
2014-06-08 20:30:00	0.151408	26.2
2014-06-08 21:00:00	0.150986	25.5
2014-06-08 21:30:00	0.150142	24.9
2014-06-08 22:00:00	0.150142	24.3
2014-06-08 22:30:00	0.14972	23.8
2014-06-08 23:00:00	0.14972	23.3
2014-06-08 23:30:00	0.149297	22.8
2014-06-09	0.148874	22.4
2014-06-09 00:30:00	0.14845	22
2014-06-09 01:00:00	0.148026	21.6
2014-06-09 01:30:00	0.148026	21.2
2014-06-09 02:00:00	0.147602	20.8
2014-06-09 02:30:00	0.147602	20.5
2014-06-09 03:00:00	0.147177	20.2
2014-06-09 03:30:00	0.147177	19.9
2014-06-09 04:00:00	0.146752	19.6
2014-06-09 04:30:00	0.146752	19.4
2014-06-09 05:00:00	0.146752	19.1
2014-06-09 05:30:00	0.146326	18.9
2014-06-09 06:00:00	0.146326	18.7
2014-06-09 06:30:00	0.146326	18.6
2014-06-09 07:00:00	0.145901	18.6
2014-06-09 07:30:00	0.146326	18.8
2014-06-09 08:00:00	0.146326	19.2
2014-06-09 08:30:00	0.146752	19.7
2014-06-09 09:00:00	0.147177	20.4
2014-06-09 09:30:00	0.147177	21.3
2014-06-09 10:00:00	0.148026	22.2
2014-06-09 10:30:00	0.14845	23.2
2014-06-09 11:00:00	0.148874	24.2
2014-06-09 11:30:00	0.149297	25.2
2014-06-09 12:00:00	0.14972	26.2
2014-06-09 12:30:00	0.150142	27.1
2014-06-09 13:00:00	0.150986	28
2014-06-09 13:30:00	0.151408	28.8
2014-06-09 14:00:00	0.151829	29.5
2014-06-09 14:30:00	0.151829	30
2014-06-09 15:00:00	0.151829	30.4
2014-06-09 15:30:00	0.151829	30.7
2014-06-09 16:00:00	0.151829	30.9
2014-06-09 16:30:00	0.151408	30.9
2014-06-09 17:00:00	0.151408	30.7
2014-06-09 17:30:00	0.150564	30.3
2014-06-09 18:00:00	0.150142	29.7
2014-06-09 18:30:00	0.149297	29
2014-06-09 19:00:00	0.148874	28.3
2014-06-09 19:30:00	0.148026	27.7
2014-06-09 20:00:00	0.147602	27
2014-06-09 20:30:00	0.147177	26.4
2014-06-09 21:00:00	0.146752	25.8
2014-06-09 21:30:00	0.146326	25.2
2014-06-09 22:00:00	0.145901	24.6
2014-06-09 22:30:00	0.145475	24.1
2014-06-09 23:00:00	0.145475	23.6
2014-06-09 23:30:00	0.145048	23.1
2014-06-10	0.145048	22.7
2014-06-10 00:30:00	0.144621	22.3
2014-06-10 01:00:00	0.144194	21.9
2014-06-10 01:30:00	0.144194	21.5
2014-06-10 02:00:00	0.144194	21.1
2014-06-10 02:30:00	0.143766	20.8
2014-06-10 03:00:00	0.143766	20.5
2014-06-10 03:30:00	0.143339	20.2
2014-06-10 04:00:00	0.143339	20
2014-06-10 04:30:00	0.14291	19.7
2014-06-10 05:00:00	0.14291	19.4
2014-06-10 05:30:00	0.14291	19.2
2014-06-10 06:00:00	0.142482	19
2014-06-10 06:30:00	0.142482	19
2014-06-10 07:00:00	0.142482	19.1
2014-06-10 07:30:00	0.142482	19.3
2014-06-10 08:00:00	0.142482	19.5
2014-06-10 08:30:00	0.14291	19.9
2014-06-10 09:00:00	0.143339	20.5
2014-06-10 09:30:00	0.143339	21.2
2014-06-10 10:00:00	0.143766	22
2014-06-10 10:30:00	0.144194	22.7
2014-06-10 11:00:00	0.144621	23.4
2014-06-10 11:30:00	0.145048	24.3
2014-06-10 12:00:00	0.145475	25.2
2014-06-10 12:30:00	0.145901	26.1
2014-06-10 13:00:00	0.146326	26.9
2014-06-10 13:30:00	0.146752	27.4
2014-06-10 14:00:00	0.146752	27.9
2014-06-10 14:30:00	0.146752	28.2
2014-06-10 15:00:00	0.146752	28.5
2014-06-10 15:30:00	0.146752	28.6
2014-06-10 16:00:00	0.146326	28.6
2014-06-10 16:30:00	0.146326	28.5
2014-06-10 17:00:00	0.145901	28.5
2014-06-10 17:30:00	0.145475	28.4
2014-06-10 18:00:00	0.145475	28
2014-06-10 18:30:00	0.144621	27.4
2014-06-10 19:00:00	0.144194	26.8
2014-06-10 19:30:00	0.144194	26.3
2014-06-10 20:00:00	0.143339	25.7
2014-06-10 20:30:00	0.14291	25.2
2014-06-10 21:00:00	0.14291	24.6
2014-06-10 21:30:00	0.142482	24.1
2014-06-10 22:00:00	0.142053	23.7
2014-06-10 22:30:00	0.142053	23.3
2014-06-10 23:00:00	0.141623	22.9
2014-06-10 23:30:00	0.141623	22.4
2014-06-11	0.141194	22.1
2014-06-11 00:30:00	0.141194	21.7
2014-06-11 01:00:00	0.140764	21.4
2014-06-11 01:30:00	0.140764	21.1
2014-06-11 02:00:00	0.140333	20.8
2014-06-11 02:30:00	0.140333	20.6
2014-06-11 03:00:00	0.140333	20.3
2014-06-11 03:30:00	0.139902	19.9
2014-06-11 04:00:00	0.139902	19.7
2014-06-11 04:30:00	0.139902	19.5
2014-06-11 05:00:00	0.139471	19.2
2014-06-11 05:30:00	0.139471	19
2014-06-11 06:00:00	0.139471	18.7
2014-06-11 06:30:00	0.13904	18.6
2014-06-11 07:00:00	0.13904	18.6
2014-06-11 07:30:00	0.139471	18.8
2014-06-11 08:00:00	0.139471	19.3
2014-06-11 08:30:00	0.139902	19.9
2014-06-11 09:00:00	0.140333	20.6
2014-06-11 09:30:00	0.140764	21.5
2014-06-11 10:00:00	0.141194	22.4
2014-06-11 10:30:00	0.141623	23.4
2014-06-11 11:00:00	0.142053	24.4
2014-06-11 11:30:00	0.142482	25.4
2014-06-11 12:00:00	0.14291	26.3
2014-06-11 12:30:00	0.143766	27.2
2014-06-11 13:00:00	0.143766	28
2014-06-11 13:30:00	0.144194	28.7
2014-06-11 14:00:00	0.144621	29.4
2014-06-11 14:30:00	0.144621	29.8
[truncated: 6,834 more rows]
