# Supplementary material for: Linking diffuse radiation and ecosystem productivity of a desert steppe ecosystem
Source: PeerJ. 2020 May 5;8:e9043. doi: 10.7717/peerj.9043 (PMC7207212; doi:10.7717/peerj.9043)
Supplement: Supplemental Information 6 — VWC soil volumetric water content in units of m3 m-3, port 1, 10 cm; port 2, 30 cm; port 3, 70 cm; port 4, 120 cm; port 5, 10 cm [file peerj-08-9043-s006.xls]

## Sheet: Sheet1
yc_2_em50_1_full	Port 1	Port 1
Measurement Time	SWC	Temp
2015-05-01	0.199843	16.6
2015-05-01 00:30:00	0.200223	16.4
2015-05-01 01:00:00	0.200223	16.2
2015-05-01 01:30:00	0.200223	16.1
2015-05-01 02:00:00	0.200223	15.9
2015-05-01 02:30:00	0.199843	15.7
2015-05-01 03:00:00	0.199843	15.6
2015-05-01 03:30:00	0.199463	15.4
2015-05-01 04:00:00	0.199083	15.3
2015-05-01 04:30:00	0.199083	15.2
2015-05-01 05:00:00	0.198703	15
2015-05-01 05:30:00	0.198703	14.9
2015-05-01 06:00:00	0.198703	14.8
2015-05-01 06:30:00	0.198703	14.6
2015-05-01 07:00:00	0.198703	14.5
2015-05-01 07:30:00	0.198703	14.4
2015-05-01 08:00:00	0.198322	14.2
2015-05-01 08:30:00	0.198322	14.1
2015-05-01 09:00:00	0.198322	14.1
2015-05-01 09:30:00	0.198322	14.1
2015-05-01 10:00:00	0.198322	14.2
2015-05-01 10:30:00	0.198322	14.4
2015-05-01 11:00:00	0.198322	14.7
2015-05-01 11:30:00	0.198322	15.1
2015-05-01 12:00:00	0.198322	15.7
2015-05-01 12:30:00	0.198703	16.3
2015-05-01 13:00:00	0.199083	16.9
2015-05-01 13:30:00	0.199843	17.6
2015-05-01 14:00:00	0.199843	18.2
2015-05-01 14:30:00	0.200223	18.7
2015-05-01 15:00:00	0.200981	19.3
2015-05-01 15:30:00	0.20136	19.9
2015-05-01 16:00:00	0.201738	20.4
2015-05-01 16:30:00	0.202116	20.9
2015-05-01 17:00:00	0.202494	21.3
2015-05-01 17:30:00	0.202871	21.6
2015-05-01 18:00:00	0.203248	21.8
2015-05-01 18:30:00	0.203248	21.9
2015-05-01 19:00:00	0.203248	21.8
2015-05-01 19:30:00	0.203248	21.6
2015-05-01 20:00:00	0.202871	21.4
2015-05-01 20:30:00	0.202494	21
2015-05-01 21:00:00	0.202116	20.6
2015-05-01 21:30:00	0.201738	20.2
2015-05-01 22:00:00	0.201738	19.8
2015-05-01 22:30:00	0.20136	19.4
2015-05-01 23:00:00	0.200981	19
2015-05-01 23:30:00	0.200981	18.7
2015-05-02	0.200602	18.4
2015-05-02 00:30:00	0.200223	18
2015-05-02 01:00:00	0.200223	17.7
2015-05-02 01:30:00	0.199843	17.5
2015-05-02 02:00:00	0.199843	17.2
2015-05-02 02:30:00	0.199463	16.9
2015-05-02 03:00:00	0.199463	16.7
2015-05-02 03:30:00	0.199463	16.5
2015-05-02 04:00:00	0.199083	16.2
2015-05-02 04:30:00	0.199083	16.1
2015-05-02 05:00:00	0.199083	15.9
2015-05-02 05:30:00	0.198703	15.7
2015-05-02 06:00:00	0.198703	15.5
2015-05-02 06:30:00	0.198703	15.4
2015-05-02 07:00:00	0.198322	15.2
2015-05-02 07:30:00	0.198322	15
2015-05-02 08:00:00	0.198322	14.9
2015-05-02 08:30:00	0.198322	14.8
2015-05-02 09:00:00	0.198322	14.8
2015-05-02 09:30:00	0.198322	14.8
2015-05-02 10:00:00	0.198322	14.9
2015-05-02 10:30:00	0.198322	15.1
2015-05-02 11:00:00	0.198703	15.3
2015-05-02 11:30:00	0.198322	15.6
2015-05-02 12:00:00	0.198703	15.9
2015-05-02 12:30:00	0.199463	16.3
2015-05-02 13:00:00	0.199843	16.8
2015-05-02 13:30:00	0.199843	17.3
2015-05-02 14:00:00	0.200223	17.6
2015-05-02 14:30:00	0.200223	18
2015-05-02 15:00:00	0.200602	18.2
2015-05-02 15:30:00	0.200602	18.4
2015-05-02 16:00:00	0.200981	18.4
2015-05-02 16:30:00	0.200981	18.5
2015-05-02 17:00:00	0.200981	18.5
2015-05-02 17:30:00	0.200981	18.5
2015-05-02 18:00:00	0.200981	18.5
2015-05-02 18:30:00	0.200981	18.5
2015-05-02 19:00:00	0.200981	18.4
2015-05-02 19:30:00	0.200981	18.3
2015-05-02 20:00:00	0.200981	18.2
2015-05-02 20:30:00	0.200602	18
2015-05-02 21:00:00	0.200602	17.9
2015-05-02 21:30:00	0.200223	17.7
2015-05-02 22:00:00	0.200223	17.5
2015-05-02 22:30:00	0.200223	17.3
2015-05-02 23:00:00	0.200223	17.2
2015-05-02 23:30:00	0.200223	17
2015-05-03	0.199843	16.8
2015-05-03 00:30:00	0.199843	16.7
2015-05-03 01:00:00	0.199843	16.6
2015-05-03 01:30:00	0.199843	16.4
2015-05-03 02:00:00	0.199843	16.3
2015-05-03 02:30:00	0.199843	16.2
2015-05-03 03:00:00	0.199463	16.1
2015-05-03 03:30:00	0.199463	15.9
2015-05-03 04:00:00	0.199083	15.8
2015-05-03 04:30:00	0.199083	15.7
2015-05-03 05:00:00	0.199083	15.6
2015-05-03 05:30:00	0.199083	15.4
2015-05-03 06:00:00	0.198703	15.3
2015-05-03 06:30:00	0.198703	15.1
2015-05-03 07:00:00	0.198703	14.9
2015-05-03 07:30:00	0.198703	14.8
2015-05-03 08:00:00	0.198703	14.6
2015-05-03 08:30:00	0.198322	14.5
2015-05-03 09:00:00	0.198322	14.5
2015-05-03 09:30:00	0.198322	14.5
2015-05-03 10:00:00	0.198322	14.6
2015-05-03 10:30:00	0.198322	14.8
2015-05-03 11:00:00	0.198322	15
2015-05-03 11:30:00	0.198703	15.3
2015-05-03 12:00:00	0.199083	15.7
2015-05-03 12:30:00	0.199843	16.1
2015-05-03 13:00:00	0.199843	16.7
2015-05-03 13:30:00	0.200223	17.4
2015-05-03 14:00:00	0.200981	18.1
2015-05-03 14:30:00	0.20136	18.8
2015-05-03 15:00:00	0.201738	19.4
2015-05-03 15:30:00	0.202116	20.1
2015-05-03 16:00:00	0.202871	20.6
2015-05-03 16:30:00	0.203248	21.1
2015-05-03 17:00:00	0.203248	21.4
2015-05-03 17:30:00	0.203625	21.7
2015-05-03 18:00:00	0.203625	21.8
2015-05-03 18:30:00	0.203625	21.8
2015-05-03 19:00:00	0.203625	21.8
2015-05-03 19:30:00	0.203625	21.6
2015-05-03 20:00:00	0.203625	21.4
2015-05-03 20:30:00	0.203248	21.1
2015-05-03 21:00:00	0.202871	20.7
2015-05-03 21:30:00	0.202871	20.4
2015-05-03 22:00:00	0.202494	20
2015-05-03 22:30:00	0.202116	19.6
2015-05-03 23:00:00	0.201738	19.2
2015-05-03 23:30:00	0.201738	18.8
2015-05-04	0.20136	18.5
2015-05-04 00:30:00	0.200981	18.1
2015-05-04 01:00:00	0.200981	17.8
2015-05-04 01:30:00	0.200602	17.5
2015-05-04 02:00:00	0.200223	17.1
2015-05-04 02:30:00	0.199843	16.8
2015-05-04 03:00:00	0.199843	16.5
2015-05-04 03:30:00	0.199463	16.2
2015-05-04 04:00:00	0.199463	16
2015-05-04 04:30:00	0.199083	15.7
2015-05-04 05:00:00	0.199083	15.5
2015-05-04 05:30:00	0.198703	15.2
2015-05-04 06:00:00	0.198703	15
2015-05-04 06:30:00	0.198322	14.8
2015-05-04 07:00:00	0.198322	14.5
2015-05-04 07:30:00	0.19794	14.3
2015-05-04 08:00:00	0.19794	14.1
2015-05-04 08:30:00	0.19794	14
2015-05-04 09:00:00	0.19794	14
2015-05-04 09:30:00	0.19794	14
2015-05-04 10:00:00	0.19794	14.1
2015-05-04 10:30:00	0.19794	14.4
2015-05-04 11:00:00	0.198322	14.7
2015-05-04 11:30:00	0.198322	15.2
2015-05-04 12:00:00	0.198703	15.8
2015-05-04 12:30:00	0.199463	16.4
2015-05-04 13:00:00	0.199843	17
2015-05-04 13:30:00	0.200223	17.7
2015-05-04 14:00:00	0.200602	18.4
2015-05-04 14:30:00	0.200981	19
2015-05-04 15:00:00	0.20136	19.6
2015-05-04 15:30:00	0.201738	20
2015-05-04 16:00:00	0.201738	20.4
2015-05-04 16:30:00	0.202116	20.7
2015-05-04 17:00:00	0.202494	21
2015-05-04 17:30:00	0.202871	21.2
2015-05-04 18:00:00	0.202871	21.3
2015-05-04 18:30:00	0.202871	21.4
2015-05-04 19:00:00	0.202871	21.4
2015-05-04 19:30:00	0.202871	21.2
2015-05-04 20:00:00	0.202871	21
2015-05-04 20:30:00	0.202494	20.8
2015-05-04 21:00:00	0.202116	20.5
2015-05-04 21:30:00	0.202116	20.2
2015-05-04 22:00:00	0.201738	20
2015-05-04 22:30:00	0.201738	19.7
2015-05-04 23:00:00	0.20136	19.4
2015-05-04 23:30:00	0.20136	19.1
2015-05-05	0.200981	18.9
2015-05-05 00:30:00	0.200981	18.6
2015-05-05 01:00:00	0.200602	18.4
2015-05-05 01:30:00	0.200223	18.2
2015-05-05 02:00:00	0.200223	18
2015-05-05 02:30:00	0.200223	17.8
2015-05-05 03:00:00	0.199843	17.6
2015-05-05 03:30:00	0.199843	17.4
2015-05-05 04:00:00	0.199843	17.3
2015-05-05 04:30:00	0.199463	17.1
2015-05-05 05:00:00	0.199463	16.9
2015-05-05 05:30:00	0.199083	16.7
2015-05-05 06:00:00	0.199083	16.6
2015-05-05 06:30:00	0.199083	16.4
2015-05-05 07:00:00	0.198703	16.3
2015-05-05 07:30:00	0.198703	16.2
2015-05-05 08:00:00	0.198703	16
2015-05-05 08:30:00	0.198322	16
2015-05-05 09:00:00	0.198322	16
2015-05-05 09:30:00	0.198322	16
2015-05-05 10:00:00	0.198322	16.1
2015-05-05 10:30:00	0.198322	16.4
2015-05-05 11:00:00	0.198703	16.6
2015-05-05 11:30:00	0.199083	17
2015-05-05 12:00:00	0.199463	17.4
2015-05-05 12:30:00	0.199843	17.8
2015-05-05 13:00:00	0.199843	18.2
2015-05-05 13:30:00	0.199843	18.6
2015-05-05 14:00:00	0.200223	18.9
2015-05-05 14:30:00	0.200602	19.3
2015-05-05 15:00:00	0.200602	19.6
2015-05-05 15:30:00	0.200981	19.7
2015-05-05 16:00:00	0.200981	19.8
2015-05-05 16:30:00	0.200981	19.9
2015-05-05 17:00:00	0.200981	20
2015-05-05 17:30:00	0.200981	20
2015-05-05 18:00:00	0.200981	20
2015-05-05 18:30:00	0.200981	20
2015-05-05 19:00:00	0.200981	19.9
2015-05-05 19:30:00	0.200981	19.8
2015-05-05 20:00:00	0.200602	19.7
2015-05-05 20:30:00	0.200602	19.5
2015-05-05 21:00:00	0.200602	19.3
2015-05-05 21:30:00	0.200223	19
2015-05-05 22:00:00	0.200223	18.8
2015-05-05 22:30:00	0.199843	18.6
2015-05-05 23:00:00	0.199843	18.3
2015-05-05 23:30:00	0.199843	18
2015-05-06	0.199843	17.8
2015-05-06 00:30:00	0.199463	17.5
2015-05-06 01:00:00	0.199083	17.3
2015-05-06 01:30:00	0.199083	17
2015-05-06 02:00:00	0.198703	16.8
2015-05-06 02:30:00	0.198322	16.5
2015-05-06 03:00:00	0.198322	16.3
2015-05-06 03:30:00	0.198322	16.1
2015-05-06 04:00:00	0.198322	15.9
2015-05-06 04:30:00	0.19794	15.7
2015-05-06 05:00:00	0.19794	15.5
2015-05-06 05:30:00	0.197559	15.3
2015-05-06 06:00:00	0.197559	15.2
2015-05-06 06:30:00	0.197559	15
2015-05-06 07:00:00	0.197559	14.8
2015-05-06 07:30:00	0.197559	14.6
2015-05-06 08:00:00	0.197177	14.5
2015-05-06 08:30:00	0.197177	14.5
2015-05-06 09:00:00	0.197177	14.5
2015-05-06 09:30:00	0.197177	14.5
2015-05-06 10:00:00	0.197177	14.7
2015-05-06 10:30:00	0.197177	14.8
2015-05-06 11:00:00	0.196794	15.1
2015-05-06 11:30:00	0.197177	15.4
2015-05-06 12:00:00	0.197559	15.9
2015-05-06 12:30:00	0.19794	16.3
2015-05-06 13:00:00	0.198322	16.9
2015-05-06 13:30:00	0.198322	17.4
2015-05-06 14:00:00	0.198703	17.8
2015-05-06 14:30:00	0.199083	18.2
2015-05-06 15:00:00	0.199463	18.5
2015-05-06 15:30:00	0.199463	18.7
2015-05-06 16:00:00	0.199843	18.9
2015-05-06 16:30:00	0.199843	19
2015-05-06 17:00:00	0.199843	19
2015-05-06 17:30:00	0.199843	19
2015-05-06 18:00:00	0.199843	19
2015-05-06 18:30:00	0.199843	18.9
2015-05-06 19:00:00	0.199463	18.9
2015-05-06 19:30:00	0.199463	18.8
2015-05-06 20:00:00	0.199463	18.7
2015-05-06 20:30:00	0.199463	18.5
2015-05-06 21:00:00	0.199083	18.3
2015-05-06 21:30:00	0.198703	18.1
2015-05-06 22:00:00	0.198703	17.8
2015-05-06 22:30:00	0.198703	17.6
2015-05-06 23:00:00	0.198322	17.3
2015-05-06 23:30:00	0.198322	17
2015-05-07	0.198322	16.8
2015-05-07 00:30:00	0.19794	16.5
2015-05-07 01:00:00	0.19794	16.3
2015-05-07 01:30:00	0.197559	16
2015-05-07 02:00:00	0.197177	15.8
2015-05-07 02:30:00	0.197177	15.6
2015-05-07 03:00:00	0.196794	15.4
2015-05-07 03:30:00	0.196794	15.2
2015-05-07 04:00:00	0.196794	15.1
2015-05-07 04:30:00	0.196794	15
2015-05-07 05:00:00	0.196794	14.8
2015-05-07 05:30:00	0.196794	14.7
2015-05-07 06:00:00	0.196794	14.6
2015-05-07 06:30:00	0.196794	14.5
2015-05-07 07:00:00	0.196794	14.5
2015-05-07 07:30:00	0.196412	14.4
2015-05-07 08:00:00	0.196412	14.3
2015-05-07 08:30:00	0.196412	14.3
2015-05-07 09:00:00	0.196412	14.3
2015-05-07 09:30:00	0.196412	14.3
2015-05-07 10:00:00	0.196412	14.3
2015-05-07 10:30:00	0.196412	14.4
2015-05-07 11:00:00	0.196412	14.4
2015-05-07 11:30:00	0.196412	14.4
2015-05-07 12:00:00	0.196412	14.5
2015-05-07 12:30:00	0.196412	14.5
2015-05-07 13:00:00	0.196412	14.6
2015-05-07 13:30:00	0.196412	14.7
2015-05-07 14:00:00	0.196412	14.8
2015-05-07 14:30:00	0.196412	14.9
2015-05-07 15:00:00	0.196412	15
2015-05-07 15:30:00	0.196412	15.1
2015-05-07 16:00:00	0.196794	15.2
2015-05-07 16:30:00	0.196794	15.3
2015-05-07 17:00:00	0.196794	15.4
2015-05-07 17:30:00	0.196794	15.5
2015-05-07 18:00:00	0.197177	15.6
2015-05-07 18:30:00	0.197177	15.6
2015-05-07 19:00:00	0.197177	15.7
2015-05-07 19:30:00	0.197177	15.7
2015-05-07 20:00:00	0.197177	15.7
2015-05-07 20:30:00	0.196794	15.6
2015-05-07 21:00:00	0.196794	15.5
2015-05-07 21:30:00	0.196794	15.3
2015-05-07 22:00:00	0.196794	15.2
2015-05-07 22:30:00	0.196412	15
2015-05-07 23:00:00	0.196412	14.8
2015-05-07 23:30:00	0.196412	14.7
2015-05-08	0.196412	14.5
2015-05-08 00:30:00	0.196029	14.4
2015-05-08 01:00:00	0.196029	14.3
2015-05-08 01:30:00	0.196029	14.1
2015-05-08 02:00:00	0.196029	14
2015-05-08 02:30:00	0.196029	13.9
2015-05-08 03:00:00	0.196029	13.8
2015-05-08 03:30:00	0.195646	13.7
2015-05-08 04:00:00	0.195646	13.6
2015-05-08 04:30:00	0.195646	13.5
2015-05-08 05:00:00	0.195646	13.4
2015-05-08 05:30:00	0.195262	13.3
2015-05-08 06:00:00	0.195262	13.2
2015-05-08 06:30:00	0.195262	13.1
2015-05-08 07:00:00	0.195262	13.1
2015-05-08 07:30:00	0.195262	13
2015-05-08 08:00:00	0.195262	13
2015-05-08 08:30:00	0.195262	12.9
2015-05-08 09:00:00	0.195262	13
2015-05-08 09:30:00	0.195262	13.1
2015-05-08 10:00:00	0.195262	13.3
2015-05-08 10:30:00	0.195262	13.6
2015-05-08 11:00:00	0.195646	14
2015-05-08 11:30:00	0.196029	14.5
2015-05-08 12:00:00	0.196412	15
2015-05-08 12:30:00	0.196794	15.5
2015-05-08 13:00:00	0.196794	15.9
2015-05-08 13:30:00	0.197177	16.3
2015-05-08 14:00:00	0.197177	16.7
2015-05-08 14:30:00	0.197559	17
2015-05-08 15:00:00	0.19794	17.4
2015-05-08 15:30:00	0.19794	17.6
2015-05-08 16:00:00	0.198322	17.9
2015-05-08 16:30:00	0.198322	18.1
2015-05-08 17:00:00	0.198322	18.2
2015-05-08 17:30:00	0.198322	18.4
2015-05-08 18:00:00	0.198322	18.6
2015-05-08 18:30:00	0.198322	18.7
2015-05-08 19:00:00	0.198703	18.8
2015-05-08 19:30:00	0.198703	18.8
2015-05-08 20:00:00	0.198703	18.7
2015-05-08 20:30:00	0.198322	18.6
2015-05-08 21:00:00	0.198322	18.4
2015-05-08 21:30:00	0.198322	18.2
2015-05-08 22:00:00	0.198322	18
2015-05-08 22:30:00	0.19794	17.8
2015-05-08 23:00:00	0.19794	17.6
2015-05-08 23:30:00	0.19794	17.5
2015-05-09	0.197559	17.3
2015-05-09 00:30:00	0.197559	17.1
2015-05-09 01:00:00	0.197559	17
2015-05-09 01:30:00	0.197177	16.8
2015-05-09 02:00:00	0.197177	16.7
2015-05-09 02:30:00	0.197177	16.6
2015-05-09 03:00:00	0.197177	16.4
2015-05-09 03:30:00	0.197177	16.3
2015-05-09 04:00:00	0.196794	16.1
2015-05-09 04:30:00	0.196794	16
2015-05-09 05:00:00	0.196794	15.8
2015-05-09 05:30:00	0.196794	15.6
2015-05-09 06:00:00	0.196794	15.4
2015-05-09 06:30:00	0.196412	15.3
2015-05-09 07:00:00	0.196412	15.1
2015-05-09 07:30:00	0.196029	15
2015-05-09 08:00:00	0.195646	14.8
2015-05-09 08:30:00	0.195646	14.7
2015-05-09 09:00:00	0.195262	14.7
2015-05-09 09:30:00	0.195646	14.8
2015-05-09 10:00:00	0.195646	14.9
2015-05-09 10:30:00	0.195646	15.2
2015-05-09 11:00:00	0.196029	15.5
2015-05-09 11:30:00	0.196412	16
2015-05-09 12:00:00	0.196412	16.5
2015-05-09 12:30:00	0.196794	17.1
2015-05-09 13:00:00	0.197177	17.7
2015-05-09 13:30:00	0.197559	18.3
2015-05-09 14:00:00	0.19794	18.8
2015-05-09 14:30:00	0.198322	19.4
2015-05-09 15:00:00	0.198322	19.9
2015-05-09 15:30:00	0.198703	20.3
2015-05-09 16:00:00	0.199083	20.8
2015-05-09 16:30:00	0.199463	21.1
2015-05-09 17:00:00	0.199843	21.3
2015-05-09 17:30:00	0.199843	21.5
2015-05-09 18:00:00	0.199843	21.6
2015-05-09 18:30:00	0.199843	21.6
2015-05-09 19:00:00	0.199843	21.6
2015-05-09 19:30:00	0.199463	21.5
2015-05-09 20:00:00	0.199463	21.4
2015-05-09 20:30:00	0.199083	21.2
2015-05-09 21:00:00	0.199083	20.9
2015-05-09 21:30:00	0.198703	20.7
2015-05-09 22:00:00	0.198703	20.5
2015-05-09 22:30:00	0.198322	20.2
2015-05-09 23:00:00	0.198322	20
2015-05-09 23:30:00	0.198322	19.8
2015-05-10	0.19794	19.6
2015-05-10 00:30:00	0.19794	19.4
2015-05-10 01:00:00	0.197559	19.3
2015-05-10 01:30:00	0.197559	19.1
2015-05-10 02:00:00	0.197559	19
2015-05-10 02:30:00	0.197559	18.8
2015-05-10 03:00:00	0.197559	18.7
2015-05-10 03:30:00	0.197177	18.5
2015-05-10 04:00:00	0.197177	18.4
2015-05-10 04:30:00	0.197177	18.2
2015-05-10 05:00:00	0.196794	18.1
2015-05-10 05:30:00	0.196029	17.9
2015-05-10 06:00:00	0.197559	17.7
2015-05-10 06:30:00	0.197559	17.5
2015-05-10 07:00:00	0.196794	17.2
2015-05-10 07:30:00	0.195646	17
2015-05-10 08:00:00	0.195262	16.7
2015-05-10 08:30:00	0.195262	16.3
2015-05-10 09:00:00	0.194878	15.9
2015-05-10 09:30:00	0.194878	15.6
2015-05-10 10:00:00	0.194494	15.4
2015-05-10 10:30:00	0.194494	15.2
2015-05-10 11:00:00	0.194109	15
2015-05-10 11:30:00	0.193724	14.9
2015-05-10 12:00:00	0.193724	14.8
2015-05-10 12:30:00	0.193724	14.7
2015-05-10 13:00:00	0.193724	14.8
2015-05-10 13:30:00	0.193724	15
2015-05-10 14:00:00	0.193724	15.1
2015-05-10 14:30:00	0.193724	15.4
2015-05-10 15:00:00	0.193724	15.6
2015-05-10 15:30:00	0.193724	15.8
2015-05-10 16:00:00	0.193724	16
2015-05-10 16:30:00	0.193724	16.2
2015-05-10 17:00:00	0.193724	16.2
2015-05-10 17:30:00	0.193724	16.3
2015-05-10 18:00:00	0.193724	16.3
2015-05-10 18:30:00	0.193724	16.3
2015-05-10 19:00:00	0.193339	16.2
2015-05-10 19:30:00	0.193339	16.1
2015-05-10 20:00:00	0.192953	15.8
2015-05-10 20:30:00	0.193339	15.5
2015-05-10 21:00:00	0.192953	15.2
2015-05-10 21:30:00	0.192567	14.9
2015-05-10 22:00:00	0.192181	14.5
2015-05-10 22:30:00	0.191795	14.2
2015-05-10 23:00:00	0.191795	13.8
2015-05-10 23:30:00	0.191795	13.5
2015-05-11	0.191795	13.2
2015-05-11 00:30:00	0.191408	12.8
2015-05-11 01:00:00	0.19102	12.5
2015-05-11 01:30:00	0.19102	12.2
2015-05-11 02:00:00	0.190633	11.9
2015-05-11 02:30:00	0.190633	11.6
2015-05-11 03:00:00	0.190633	11.3
2015-05-11 03:30:00	0.190245	11.1
2015-05-11 04:00:00	0.190245	10.8
2015-05-11 04:30:00	0.190245	10.5
2015-05-11 05:00:00	0.190245	10.3
2015-05-11 05:30:00	0.189857	10
2015-05-11 06:00:00	0.189857	9.8
2015-05-11 06:30:00	0.189468	9.6
2015-05-11 07:00:00	0.189857	9.4
2015-05-11 07:30:00	0.189857	9.3
2015-05-11 08:00:00	0.189857	9.1
2015-05-11 08:30:00	0.189857	9
2015-05-11 09:00:00	0.189857	9.1
2015-05-11 09:30:00	0.189857	9.3
2015-05-11 10:00:00	0.189857	9.6
2015-05-11 10:30:00	0.190245	10
2015-05-11 11:00:00	0.190245	10.6
2015-05-11 11:30:00	0.190633	11.2
2015-05-11 12:00:00	0.190633	11.8
2015-05-11 12:30:00	0.191408	12.4
2015-05-11 13:00:00	0.191795	13.1
2015-05-11 13:30:00	0.192181	13.8
2015-05-11 14:00:00	0.192567	14.4
2015-05-11 14:30:00	0.192953	15.1
2015-05-11 15:00:00	0.193724	15.7
2015-05-11 15:30:00	0.194109	16.5
2015-05-11 16:00:00	0.194494	17.2
2015-05-11 16:30:00	0.194878	17.8
2015-05-11 17:00:00	0.195262	18.4
2015-05-11 17:30:00	0.195262	18.7
2015-05-11 18:00:00	0.195646	19
2015-05-11 18:30:00	0.195646	19.1
2015-05-11 19:00:00	0.195646	19
2015-05-11 19:30:00	0.195646	18.8
2015-05-11 20:00:00	0.195262	18.5
2015-05-11 20:30:00	0.195262	18.2
2015-05-11 21:00:00	0.195262	17.8
2015-05-11 21:30:00	0.194878	17.3
2015-05-11 22:00:00	0.194109	16.9
2015-05-11 22:30:00	0.193724	16.4
2015-05-11 23:00:00	0.193724	16
2015-05-11 23:30:00	0.193724	15.6
2015-05-12	0.193339	15.2
2015-05-12 00:30:00	0.192953	14.8
2015-05-12 01:00:00	0.192567	14.4
2015-05-12 01:30:00	0.192181	14
2015-05-12 02:00:00	0.192181	13.6
2015-05-12 02:30:00	0.192181	13.3
2015-05-12 03:00:00	0.191795	12.9
2015-05-12 03:30:00	0.191795	12.6
2015-05-12 04:00:00	0.191408	12.3
2015-05-12 04:30:00	0.19102	12
2015-05-12 05:00:00	0.19102	11.8
2015-05-12 05:30:00	0.19102	11.5
2015-05-12 06:00:00	0.190633	11.2
2015-05-12 06:30:00	0.190633	11
2015-05-12 07:00:00	0.190633	10.7
2015-05-12 07:30:00	0.190633	10.5
2015-05-12 08:00:00	0.190633	10.4
2015-05-12 08:30:00	0.190633	10.3
2015-05-12 09:00:00	0.190633	10.4
2015-05-12 09:30:00	0.190633	10.6
2015-05-12 10:00:00	0.19102	11
2015-05-12 10:30:00	0.191408	11.5
2015-05-12 11:00:00	0.191795	12.2
2015-05-12 11:30:00	0.192567	13.1
2015-05-12 12:00:00	0.193339	14.1
2015-05-12 12:30:00	0.194109	15.1
2015-05-12 13:00:00	0.194878	16.1
2015-05-12 13:30:00	0.195646	17.1
2015-05-12 14:00:00	0.196029	18
2015-05-12 14:30:00	0.196794	18.9
2015-05-12 15:00:00	0.197559	19.7
2015-05-12 15:30:00	0.19794	20.5
2015-05-12 16:00:00	0.198703	21
2015-05-12 16:30:00	0.199083	21.5
2015-05-12 17:00:00	0.199463	21.8
2015-05-12 17:30:00	0.199463	22
2015-05-12 18:00:00	0.199843	22
2015-05-12 18:30:00	0.199463	22
2015-05-12 19:00:00	0.199463	21.9
2015-05-12 19:30:00	0.199083	21.7
2015-05-12 20:00:00	0.198703	21.4
2015-05-12 20:30:00	0.198703	21
2015-05-12 21:00:00	0.198322	20.6
2015-05-12 21:30:00	0.19794	20.1
2015-05-12 22:00:00	0.197177	19.6
2015-05-12 22:30:00	0.197177	19.2
2015-05-12 23:00:00	0.196794	18.7
2015-05-12 23:30:00	0.196794	18.3
2015-05-13	0.196412	17.9
2015-05-13 00:30:00	0.196029	17.6
2015-05-13 01:00:00	0.195646	17.3
2015-05-13 01:30:00	0.195646	17
2015-05-13 02:00:00	0.195262	16.7
2015-05-13 02:30:00	0.195262	16.5
2015-05-13 03:00:00	0.194878	16.3
2015-05-13 03:30:00	0.194878	16
2015-05-13 04:00:00	0.194878	15.8
2015-05-13 04:30:00	0.194494	15.6
2015-05-13 05:00:00	0.194494	15.4
2015-05-13 05:30:00	0.194109	15.2
2015-05-13 06:00:00	0.194109	15
2015-05-13 06:30:00	0.193724	14.8
2015-05-13 07:00:00	0.193724	14.6
2015-05-13 07:30:00	0.193724	14.4
2015-05-13 08:00:00	0.193724	14.3
2015-05-13 08:30:00	0.193339	14.3
2015-05-13 09:00:00	0.193339	14.4
2015-05-13 09:30:00	0.193724	14.6
2015-05-13 10:00:00	0.193724	14.8
2015-05-13 10:30:00	0.194109	15.2
2015-05-13 11:00:00	0.194494	15.6
2015-05-13 11:30:00	0.194494	16.1
2015-05-13 12:00:00	0.194878	16.7
2015-05-13 12:30:00	0.195262	17.4
2015-05-13 13:00:00	0.196029	18.2
2015-05-13 13:30:00	0.196412	19
2015-05-13 14:00:00	0.196794	19.7
2015-05-13 14:30:00	0.197559	20.5
2015-05-13 15:00:00	0.19794	21.3
2015-05-13 15:30:00	0.198703	22
2015-05-13 16:00:00	0.199463	22.5
2015-05-13 16:30:00	0.199843	22.9
2015-05-13 17:00:00	0.199843	23.2
2015-05-13 17:30:00	0.199843	23.3
2015-05-13 18:00:00	0.199843	23.3
2015-05-13 18:30:00	0.199843	23.3
2015-05-13 19:00:00	0.199843	23.2
2015-05-13 19:30:00	0.199463	23
2015-05-13 20:00:00	0.199083	22.8
2015-05-13 20:30:00	0.199083	22.4
2015-05-13 21:00:00	0.198703	22.1
2015-05-13 21:30:00	0.198322	21.7
2015-05-13 22:00:00	0.198322	21.4
2015-05-13 22:30:00	0.19794	21
2015-05-13 23:00:00	0.197559	20.7
2015-05-13 23:30:00	0.197559	20.4
2015-05-14	0.197177	20.1
2015-05-14 00:30:00	0.196794	19.9
2015-05-14 01:00:00	0.196794	19.6
2015-05-14 01:30:00	0.196794	19.4
2015-05-14 02:00:00	0.196794	19.1
2015-05-14 02:30:00	0.196412	18.9
2015-05-14 03:00:00	0.196412	18.7
2015-05-14 03:30:00	0.196029	18.5
2015-05-14 04:00:00	0.196029	18.3
2015-05-14 04:30:00	0.196029	18.1
2015-05-14 05:00:00	0.195646	17.9
2015-05-14 05:30:00	0.195646	17.8
2015-05-14 06:00:00	0.195262	17.6
2015-05-14 06:30:00	0.195262	17.4
2015-05-14 07:00:00	0.195262	17.3
2015-05-14 07:30:00	0.195262	17.1
2015-05-14 08:00:00	0.195262	17.1
2015-05-14 08:30:00	0.195262	17
2015-05-14 09:00:00	0.195262	17
2015-05-14 09:30:00	0.194878	17.2
2015-05-14 10:00:00	0.195262	17.4
2015-05-14 10:30:00	0.195262	17.6
2015-05-14 11:00:00	0.195262	17.9
2015-05-14 11:30:00	0.195262	18.1
2015-05-14 12:00:00	0.195646	18.4
2015-05-14 12:30:00	0.195646	18.7
2015-05-14 13:00:00	0.196029	19.2
2015-05-14 13:30:00	0.196412	19.7
2015-05-14 14:00:00	0.196794	20.4
2015-05-14 14:30:00	0.197177	21
2015-05-14 15:00:00	0.19794	21.5
2015-05-14 15:30:00	0.19794	22
2015-05-14 16:00:00	0.198322	22.3
2015-05-14 16:30:00	0.198322	22.6
2015-05-14 17:00:00	0.198703	22.9
2015-05-14 17:30:00	0.198703	23
2015-05-14 18:00:00	0.198703	23
2015-05-14 18:30:00	0.198703	23
2015-05-14 19:00:00	0.198703	22.9
2015-05-14 19:30:00	0.198703	22.8
2015-05-14 20:00:00	0.198703	22.6
2015-05-14 20:30:00	0.198322	22.4
2015-05-14 21:00:00	0.198322	22.1
2015-05-14 21:30:00	0.19794	21.8
2015-05-14 22:00:00	0.197559	21.4
2015-05-14 22:30:00	0.197559	21.1
2015-05-14 23:00:00	0.197177	20.7
2015-05-14 23:30:00	0.196794	20.4
2015-05-15	0.196794	20
2015-05-15 00:30:00	0.196412	19.7
2015-05-15 01:00:00	0.196412	19.4
2015-05-15 01:30:00	0.196029	19
2015-05-15 02:00:00	0.195646	18.7
2015-05-15 02:30:00	0.195646	18.5
2015-05-15 03:00:00	0.195262	18.2
2015-05-15 03:30:00	0.195262	17.9
2015-05-15 04:00:00	0.195262	17.6
2015-05-15 04:30:00	0.194878	17.4
2015-05-15 05:00:00	0.194494	17.1
2015-05-15 05:30:00	0.194494	16.8
2015-05-15 06:00:00	0.194109	16.6
2015-05-15 06:30:00	0.194109	16.3
2015-05-15 07:00:00	0.194109	16.1
2015-05-15 07:30:00	0.193724	15.9
2015-05-15 08:00:00	0.193724	15.7
2015-05-15 08:30:00	0.193724	15.6
2015-05-15 09:00:00	0.193724	15.6
2015-05-15 09:30:00	0.193724	15.7
2015-05-15 10:00:00	0.193724	15.9
2015-05-15 10:30:00	0.193724	16.3
2015-05-15 11:00:00	0.194109	16.8
2015-05-15 11:30:00	0.194878	17.5
2015-05-15 12:00:00	0.195262	18.2
2015-05-15 12:30:00	0.195646	19
2015-05-15 13:00:00	0.196412	19.8
2015-05-15 13:30:00	0.196794	20.6
2015-05-15 14:00:00	0.197559	21.4
2015-05-15 14:30:00	0.19794	22.1
2015-05-15 15:00:00	0.198322	22.8
2015-05-15 15:30:00	0.199083	23.5
2015-05-15 16:00:00	0.199843	24
2015-05-15 16:30:00	0.199843	24.4
2015-05-15 17:00:00	0.200223	24.8
2015-05-15 17:30:00	0.200223	25
2015-05-15 18:00:00	0.200223	25.1
2015-05-15 18:30:00	0.200223	25.1
2015-05-15 19:00:00	0.200223	25
2015-05-15 19:30:00	0.199843	24.8
2015-05-15 20:00:00	0.199843	24.5
2015-05-15 20:30:00	0.199463	24.1
2015-05-15 21:00:00	0.199083	23.7
2015-05-15 21:30:00	0.198703	23.2
2015-05-15 22:00:00	0.198322	22.8
2015-05-15 22:30:00	0.198322	22.3
2015-05-15 23:00:00	0.197559	21.8
2015-05-15 23:30:00	0.197177	21.4
2015-05-16	0.196794	21
2015-05-16 00:30:00	0.196794	20.6
2015-05-16 01:00:00	0.196412	20.1
2015-05-16 01:30:00	0.196029	19.8
2015-05-16 02:00:00	0.195646	19.4
2015-05-16 02:30:00	0.195262	19
2015-05-16 03:00:00	0.195262	18.7
2015-05-16 03:30:00	0.194878	18.4
2015-05-16 04:00:00	0.194878	18.1
2015-05-16 04:30:00	0.194494	17.8
2015-05-16 05:00:00	0.194109	17.5
2015-05-16 05:30:00	0.194109	17.2
2015-05-16 06:00:00	0.193724	16.9
2015-05-16 06:30:00	0.193724	16.7
2015-05-16 07:00:00	0.193339	16.5
2015-05-16 07:30:00	0.193339	16.3
2015-05-16 08:00:00	0.193339	16.1
2015-05-16 08:30:00	0.192953	16
2015-05-16 09:00:00	0.192953	16
2015-05-16 09:30:00	0.192953	16.1
2015-05-16 10:00:00	0.193339	16.4
2015-05-16 10:30:00	0.193339	16.7
2015-05-16 11:00:00	0.193724	17.2
2015-05-16 11:30:00	0.194109	17.8
2015-05-16 12:00:00	0.194494	18.5
2015-05-16 12:30:00	0.194878	19.2
2015-05-16 13:00:00	0.195262	19.9
2015-05-16 13:30:00	0.196029	20.6
2015-05-16 14:00:00	0.196412	21.4
2015-05-16 14:30:00	0.197177	22.1
2015-05-16 15:00:00	0.197559	22.7
2015-05-16 15:30:00	0.19794	23.2
2015-05-16 16:00:00	0.198322	23.6
2015-05-16 16:30:00	0.198322	24
2015-05-16 17:00:00	0.198703	24.2
2015-05-16 17:30:00	0.198703	24.2
2015-05-16 18:00:00	0.198703	24.2
2015-05-16 18:30:00	0.198322	24.1
2015-05-16 19:00:00	0.198322	24
2015-05-16 19:30:00	0.198322	23.8
2015-05-16 20:00:00	0.19794	23.6
2015-05-16 20:30:00	0.19794	23.3
2015-05-16 21:00:00	0.197559	23
2015-05-16 21:30:00	0.197559	22.8
2015-05-16 22:00:00	0.197177	22.5
2015-05-16 22:30:00	0.196794	22.2
2015-05-16 23:00:00	0.196794	21.9
2015-05-16 23:30:00	0.196412	21.6
2015-05-17	0.196412	21.3
2015-05-17 00:30:00	0.196029	21
2015-05-17 01:00:00	0.196029	20.7
2015-05-17 01:30:00	0.195646	20.5
2015-05-17 02:00:00	0.195262	20.2
2015-05-17 02:30:00	0.195262	20
2015-05-17 03:00:00	0.194878	19.8
2015-05-17 03:30:00	0.194878	19.6
2015-05-17 04:00:00	0.194878	19.4
2015-05-17 04:30:00	0.194494	19.2
2015-05-17 05:00:00	0.194494	19
2015-05-17 05:30:00	0.194494	18.8
2015-05-17 06:00:00	0.194109	18.6
2015-05-17 06:30:00	0.194109	18.4
2015-05-17 07:00:00	0.193724	18.3
2015-05-17 07:30:00	0.193724	18.1
2015-05-17 08:00:00	0.193724	18
2015-05-17 08:30:00	0.193339	17.9
2015-05-17 09:00:00	0.193339	17.9
2015-05-17 09:30:00	0.193339	18
2015-05-17 10:00:00	0.193339	18.2
2015-05-17 10:30:00	0.193724	18.5
2015-05-17 11:00:00	0.193724	18.9
2015-05-17 11:30:00	0.194109	19.4
2015-05-17 12:00:00	0.194878	20
2015-05-17 12:30:00	0.194878	20.6
2015-05-17 13:00:00	0.195262	21.3
2015-05-17 13:30:00	0.195646	22.1
2015-05-17 14:00:00	0.196412	22.8
2015-05-17 14:30:00	0.196794	23.4
2015-05-17 15:00:00	0.197177	24
2015-05-17 15:30:00	0.197559	24.5
2015-05-17 16:00:00	0.197559	24.9
2015-05-17 16:30:00	0.198322	25.2
2015-05-17 17:00:00	0.198322	25.4
2015-05-17 17:30:00	0.198322	25.5
2015-05-17 18:00:00	0.198322	25.5
2015-05-17 18:30:00	0.198322	25.4
2015-05-17 19:00:00	0.198322	25.3
2015-05-17 19:30:00	0.19794	25.1
2015-05-17 20:00:00	0.19794	24.9
2015-05-17 20:30:00	0.197559	24.6
2015-05-17 21:00:00	0.197177	24.2
2015-05-17 21:30:00	0.196794	23.9
2015-05-17 22:00:00	0.196794	23.6
2015-05-17 22:30:00	0.196794	23.3
2015-05-17 23:00:00	0.196412	23
2015-05-17 23:30:00	0.196029	22.7
2015-05-18	0.195646	22.4
2015-05-18 00:30:00	0.195262	22
2015-05-18 01:00:00	0.195262	21.7
2015-05-18 01:30:00	0.194878	21.4
2015-05-18 02:00:00	0.194878	21.1
2015-05-18 02:30:00	0.194494	20.7
2015-05-18 03:00:00	0.194494	20.4
2015-05-18 03:30:00	0.194109	20.1
2015-05-18 04:00:00	0.193724	19.8
2015-05-18 04:30:00	0.193339	19.6
2015-05-18 05:00:00	0.193339	19.3
2015-05-18 05:30:00	0.193339	19.1
2015-05-18 06:00:00	0.193339	18.8
2015-05-18 06:30:00	0.192953	18.6
2015-05-18 07:00:00	0.192567	18.3
2015-05-18 07:30:00	0.192181	18.1
2015-05-18 08:00:00	0.192181	17.9
2015-05-18 08:30:00	0.192181	17.8
2015-05-18 09:00:00	0.192181	17.7
2015-05-18 09:30:00	0.191795	17.8
2015-05-18 10:00:00	0.192181	18
2015-05-18 10:30:00	0.192181	18.3
2015-05-18 11:00:00	0.192567	18.8
2015-05-18 11:30:00	0.192953	19.3
2015-05-18 12:00:00	0.193339	20
2015-05-18 12:30:00	0.193724	20.7
2015-05-18 13:00:00	0.194109	21.4
2015-05-18 13:30:00	0.194878	22.2
2015-05-18 14:00:00	0.195262	22.9
2015-05-18 14:30:00	0.195646	23.6
2015-05-18 15:00:00	0.196029	24.2
2015-05-18 15:30:00	0.196794	24.8
2015-05-18 16:00:00	0.196794	25.3
2015-05-18 16:30:00	0.197177	25.7
2015-05-18 17:00:00	0.197559	26
2015-05-18 17:30:00	0.197559	26.2
2015-05-18 18:00:00	0.197559	26.4
2015-05-18 18:30:00	0.197559	26.4
2015-05-18 19:00:00	0.197559	26.4
2015-05-18 19:30:00	0.197559	26.2
2015-05-18 20:00:00	0.197177	26
2015-05-18 20:30:00	0.197177	25.7
2015-05-18 21:00:00	0.196794	25.3
2015-05-18 21:30:00	0.196794	25
2015-05-18 22:00:00	0.196412	24.6
2015-05-18 22:30:00	0.196029	24.2
2015-05-18 23:00:00	0.195646	23.8
2015-05-18 23:30:00	0.195262	23.4
2015-05-19	0.195262	23.1
2015-05-19 00:30:00	0.194878	22.7
2015-05-19 01:00:00	0.194494	22.4
2015-05-19 01:30:00	0.194109	22
2015-05-19 02:00:00	0.194109	21.7
2015-05-19 02:30:00	0.193724	21.4
2015-05-19 03:00:00	0.193724	21.1
2015-05-19 03:30:00	0.193339	20.9
2015-05-19 04:00:00	0.193339	20.6
2015-05-19 04:30:00	0.192953	20.4
2015-05-19 05:00:00	0.192953	20.1
2015-05-19 05:30:00	0.192953	19.9
2015-05-19 06:00:00	0.192953	19.7
2015-05-19 06:30:00	0.192567	19.5
2015-05-19 07:00:00	0.192567	19.3
2015-05-19 07:30:00	0.192181	19.1
2015-05-19 08:00:00	0.192181	19
2015-05-19 08:30:00	0.191795	18.9
2015-05-19 09:00:00	0.191795	18.8
2015-05-19 09:30:00	0.191795	18.8
2015-05-19 10:00:00	0.191795	18.9
2015-05-19 10:30:00	0.191795	19.1
2015-05-19 11:00:00	0.191795	19.3
2015-05-19 11:30:00	0.191795	19.6
2015-05-19 12:00:00	0.191795	20
2015-05-19 12:30:00	0.192181	20.5
2015-05-19 13:00:00	0.192567	21
2015-05-19 13:30:00	0.192953	21.5
2015-05-19 14:00:00	0.193339	22
2015-05-19 14:30:00	0.193339	22.4
2015-05-19 15:00:00	0.193724	22.9
2015-05-19 15:30:00	0.194109	23.2
2015-05-19 16:00:00	0.194494	23.5
2015-05-19 16:30:00	0.194494	23.7
2015-05-19 17:00:00	0.194494	23.8
2015-05-19 17:30:00	0.194494	23.8
2015-05-19 18:00:00	0.194494	23.7
2015-05-19 18:30:00	0.194109	23.7
2015-05-19 19:00:00	0.194109	23.5
2015-05-19 19:30:00	0.194109	23.4
2015-05-19 20:00:00	0.194109	23.2
2015-05-19 20:30:00	0.193724	23
2015-05-19 21:00:00	0.193339	22.7
2015-05-19 21:30:00	0.193339	22.5
2015-05-19 22:00:00	0.193339	22.2
2015-05-19 22:30:00	0.193339	22
2015-05-19 23:00:00	0.192953	21.7
2015-05-19 23:30:00	0.192953	21.5
2015-05-20	0.192567	21.2
2015-05-20 00:30:00	0.192181	20.9
2015-05-20 01:00:00	0.192181	20.7
2015-05-20 01:30:00	0.191795	20.4
2015-05-20 02:00:00	0.191795	20.1
2015-05-20 02:30:00	0.191795	19.8
2015-05-20 03:00:00	0.191408	19.5
2015-05-20 03:30:00	0.191408	19.3
2015-05-20 04:00:00	0.19102	19
2015-05-20 04:30:00	0.19102	18.8
2015-05-20 05:00:00	0.19102	18.5
2015-05-20 05:30:00	0.190633	18.3
2015-05-20 06:00:00	0.190633	18.1
2015-05-20 06:30:00	0.190633	17.9
2015-05-20 07:00:00	0.190245	17.7
2015-05-20 07:30:00	0.190245	17.5
2015-05-20 08:00:00	0.190245	17.4
2015-05-20 08:30:00	0.189857	17.2
2015-05-20 09:00:00	0.189857	17.2
2015-05-20 09:30:00	0.189857	17.2
2015-05-20 10:00:00	0.189857	17.2
2015-05-20 10:30:00	0.189857	17.3
2015-05-20 11:00:00	0.189857	17.4
2015-05-20 11:30:00	0.189857	17.5
2015-05-20 12:00:00	0.190245	17.7
2015-05-20 12:30:00	0.189857	17.8
2015-05-20 13:00:00	0.190245	17.9
2015-05-20 13:30:00	0.190245	18
2015-05-20 14:00:00	0.190245	18
2015-05-20 14:30:00	0.189857	18
2015-05-20 15:00:00	0.189079	18
2015-05-20 15:30:00	0.190633	17.9
2015-05-20 16:00:00	0.19102	17.8
2015-05-20 16:30:00	0.190245	17.7
2015-05-20 17:00:00	0.189079	17.5
2015-05-20 17:30:00	0.1883	17.4
2015-05-20 18:00:00	0.18791	17.1
2015-05-20 18:30:00	0.18791	16.9
2015-05-20 19:00:00	0.18752	16.7
2015-05-20 19:30:00	0.187129	16.5
2015-05-20 20:00:00	0.185955	16.3
2015-05-20 20:30:00	0.185955	16.2
2015-05-20 21:00:00	0.185171	15.9
2015-05-20 21:30:00	0.184385	15.7
2015-05-20 22:00:00	0.184385	15.5
2015-05-20 22:30:00	0.184778	15.2
2015-05-20 23:00:00	0.186738	15
2015-05-20 23:30:00	0.195262	14.7
2015-05-21	0.214406	14.5
2015-05-21 00:30:00	0.227056	14.2
2015-05-21 01:00:00	0.233412	14
2015-05-21 01:30:00	0.236204	13.8
2015-05-21 02:00:00	0.237246	13.6
2015-05-21 02:30:00	0.237246	13.5
2015-05-21 03:00:00	0.237246	13.3
2015-05-21 03:30:00	0.236899	13.2
2015-05-21 04:00:00	0.236551	13.1
2015-05-21 04:30:00	0.236551	13
2015-05-21 05:00:00	0.236551	12.9
2015-05-21 05:30:00	0.236551	12.8
2015-05-21 06:00:00	0.236204	12.7
2015-05-21 06:30:00	0.236204	12.6
2015-05-21 07:00:00	0.235856	12.5
2015-05-21 07:30:00	0.235507	12.4
2015-05-21 08:00:00	0.235159	12.4
2015-05-21 08:30:00	0.235159	12.3
2015-05-21 09:00:00	0.23481	12.3
2015-05-21 09:30:00	0.23481	12.3
2015-05-21 10:00:00	0.234461	12.2
2015-05-21 10:30:00	0.234461	12.3
2015-05-21 11:00:00	0.234111	12.3
2015-05-21 11:30:00	0.234111	12.5
2015-05-21 12:00:00	0.233762	12.7
2015-05-21 12:30:00	0.234111	12.9
2015-05-21 13:00:00	0.234111	13.2
2015-05-21 13:30:00	0.233762	13.6
2015-05-21 14:00:00	0.233412	13.9
2015-05-21 14:30:00	0.233412	14.2
2015-05-21 15:00:00	0.233412	14.5
2015-05-21 15:30:00	0.233412	14.8
2015-05-21 16:00:00	0.233061	15
2015-05-21 16:30:00	0.23271	15
2015-05-21 17:00:00	0.23271	15
2015-05-21 17:30:00	0.232359	15
2015-05-21 18:00:00	0.231656	15
2015-05-21 18:30:00	0.231305	15
2015-05-21 19:00:00	0.231305	15.1
2015-05-21 19:30:00	0.230952	15.1
2015-05-21 20:00:00	0.230952	15.1
2015-05-21 20:30:00	0.230247	15
2015-05-21 21:00:00	0.22954	14.8
2015-05-21 21:30:00	0.229186	14.6
2015-05-21 22:00:00	0.228832	14.4
2015-05-21 22:30:00	0.228478	14.1
2015-05-21 23:00:00	0.228123	13.9
2015-05-21 23:30:00	0.227768	13.7
2015-05-22	0.227412	13.5
2015-05-22 00:30:00	0.227056	13.2
2015-05-22 01:00:00	0.2267	13.1
2015-05-22 01:30:00	0.226344	12.9
2015-05-22 02:00:00	0.225987	12.7
2015-05-22 02:30:00	0.22563	12.5
2015-05-22 03:00:00	0.22563	12.4
2015-05-22 03:30:00	0.225273	12.2
2015-05-22 04:00:00	0.224558	12.1
2015-05-22 04:30:00	0.224558	11.9
2015-05-22 05:00:00	0.224199	11.7
2015-05-22 05:30:00	0.223841	11.6
2015-05-22 06:00:00	0.223841	11.4
2015-05-22 06:30:00	0.223482	11.3
2015-05-22 07:00:00	0.222763	11.1
2015-05-22 07:30:00	0.222763	11
2015-05-22 08:00:00	0.222043	11
2015-05-22 08:30:00	0.222043	11
2015-05-22 09:00:00	0.222043	11.1
2015-05-22 09:30:00	0.222043	11.5
2015-05-22 10:00:00	0.222043	11.9
2015-05-22 10:30:00	0.222403	12.5
2015-05-22 11:00:00	0.222763	13.3
2015-05-22 11:30:00	0.223123	14
2015-05-22 12:00:00	0.223482	14.8
2015-05-22 12:30:00	0.223482	15.5
2015-05-22 13:00:00	0.223482	16.3
2015-05-22 13:30:00	0.223841	17
2015-05-22 14:00:00	0.223841	17.7
2015-05-22 14:30:00	0.224199	18.4
2015-05-22 15:00:00	0.224199	19
2015-05-22 15:30:00	0.224199	19.5
2015-05-22 16:00:00	0.224199	20
2015-05-22 16:30:00	0.224199	20.5
2015-05-22 17:00:00	0.224199	20.9
2015-05-22 17:30:00	0.223841	21.3
2015-05-22 18:00:00	0.223841	21.5
2015-05-22 18:30:00	0.223482	21.6
2015-05-22 19:00:00	0.223123	21.5
2015-05-22 19:30:00	0.222403	21.3
2015-05-22 20:00:00	0.222043	21
2015-05-22 20:30:00	0.222043	20.7
2015-05-22 21:00:00	0.221322	20.3
2015-05-22 21:30:00	0.220599	19.9
2015-05-22 22:00:00	0.220237	19.4
2015-05-22 22:30:00	0.219513	19
2015-05-22 23:00:00	0.218787	18.6
2015-05-22 23:30:00	0.218787	18.2
2015-05-23	0.21806	17.8
2015-05-23 00:30:00	0.217332	17.5
2015-05-23 01:00:00	0.216967	17.2
2015-05-23 01:30:00	0.216602	16.8
2015-05-23 02:00:00	0.216237	16.6
2015-05-23 02:30:00	0.215871	16.3
2015-05-23 03:00:00	0.215871	16
2015-05-23 03:30:00	0.215505	15.7
2015-05-23 04:00:00	0.215139	15.5
2015-05-23 04:30:00	0.215139	15.3
2015-05-23 05:00:00	0.214773	15.1
2015-05-23 05:30:00	0.214406	14.9
2015-05-23 06:00:00	0.214039	14.7
2015-05-23 06:30:00	0.214039	14.5
2015-05-23 07:00:00	0.213671	14.4
2015-05-23 07:30:00	0.213671	14.2
2015-05-23 08:00:00	0.213303	14.1
2015-05-23 08:30:00	0.213671	14.1
2015-05-23 09:00:00	0.213303	14.2
2015-05-23 09:30:00	0.213303	14.4
2015-05-23 10:00:00	0.213671	14.8
2015-05-23 10:30:00	0.213671	15.4
2015-05-23 11:00:00	0.213671	16.1
2015-05-23 11:30:00	0.214406	17
2015-05-23 12:00:00	0.215139	17.9
2015-05-23 12:30:00	0.215139	18.8
2015-05-23 13:00:00	0.215505	19.5
2015-05-23 13:30:00	0.216237	20.3
2015-05-23 14:00:00	0.216967	21
2015-05-23 14:30:00	0.216967	21.8
2015-05-23 15:00:00	0.217332	22.5
2015-05-23 15:30:00	0.217696	23.2
2015-05-23 16:00:00	0.218424	23.8
2015-05-23 16:30:00	0.218424	24.2
2015-05-23 17:00:00	0.218424	24.5
2015-05-23 17:30:00	0.218424	24.7
2015-05-23 18:00:00	0.218424	24.8
2015-05-23 18:30:00	0.21806	24.8
2015-05-23 19:00:00	0.217696	24.6
2015-05-23 19:30:00	0.217332	24.3
2015-05-23 20:00:00	0.216967	24
2015-05-23 20:30:00	0.216602	23.6
2015-05-23 21:00:00	0.215871	23.2
2015-05-23 21:30:00	0.215505	22.7
2015-05-23 22:00:00	0.215139	22.3
2015-05-23 22:30:00	0.214773	21.8
2015-05-23 23:00:00	0.214039	21.4
2015-05-23 23:30:00	0.213671	21.1
2015-05-24	0.213671	20.7
2015-05-24 00:30:00	0.213303	20.4
2015-05-24 01:00:00	0.212935	20.1
2015-05-24 01:30:00	0.212566	19.8
2015-05-24 02:00:00	0.211828	19.5
2015-05-24 02:30:00	0.211828	19.3
2015-05-24 03:00:00	0.211828	19.1
2015-05-24 03:30:00	0.211828	18.8
2015-05-24 04:00:00	0.211459	18.6
2015-05-24 04:30:00	0.211089	18.4
2015-05-24 05:00:00	0.210719	18.2
2015-05-24 05:30:00	0.210719	18
2015-05-24 06:00:00	0.210719	17.8
2015-05-24 06:30:00	0.210349	17.6
2015-05-24 07:00:00	0.210349	17.4
2015-05-24 07:30:00	0.209978	17.3
2015-05-24 08:00:00	0.209978	17.2
2015-05-24 08:30:00	0.209978	17.1
2015-05-24 09:00:00	0.209978	17.1
2015-05-24 09:30:00	0.209978	17.3
2015-05-24 10:00:00	0.209978	17.5
2015-05-24 10:30:00	0.209978	17.9
2015-05-24 11:00:00	0.210349	18.3
2015-05-24 11:30:00	0.210349	18.9
2015-05-24 12:00:00	0.210719	19.6
2015-05-24 12:30:00	0.211459	20.3
2015-05-24 13:00:00	0.211828	21
2015-05-24 13:30:00	0.211828	21.8
2015-05-24 14:00:00	0.212566	22.5
2015-05-24 14:30:00	0.213303	23.2
2015-05-24 15:00:00	0.213671	23.9
2015-05-24 15:30:00	0.213671	24.5
2015-05-24 16:00:00	0.214039	25
2015-05-24 16:30:00	0.214039	25.3
2015-05-24 17:00:00	0.214406	25.7
2015-05-24 17:30:00	0.214406	25.9
2015-05-24 18:00:00	0.214773	26
2015-05-24 18:30:00	0.214406	25.9
2015-05-24 19:00:00	0.214406	25.8
2015-05-24 19:30:00	0.214039	25.6
2015-05-24 20:00:00	0.213671	25.3
2015-05-24 20:30:00	0.213303	25
2015-05-24 21:00:00	0.212935	24.6
2015-05-24 21:30:00	0.212198	24.2
2015-05-24 22:00:00	0.211828	23.8
2015-05-24 22:30:00	0.211828	23.4
2015-05-24 23:00:00	0.211459	23.1
2015-05-24 23:30:00	0.210719	22.7
2015-05-25	0.210719	22.4
2015-05-25 00:30:00	0.210349	22.1
2015-05-25 01:00:00	0.209978	21.8
2015-05-25 01:30:00	0.209978	21.5
2015-05-25 02:00:00	0.209607	21.2
2015-05-25 02:30:00	0.209235	21
2015-05-25 03:00:00	0.208864	20.7
2015-05-25 03:30:00	0.208864	20.5
2015-05-25 04:00:00	0.208491	20.2
2015-05-25 04:30:00	0.208491	20
2015-05-25 05:00:00	0.208119	19.8
2015-05-25 05:30:00	0.208119	19.5
2015-05-25 06:00:00	0.207746	19.3
2015-05-25 06:30:00	0.207373	19.1
2015-05-25 07:00:00	0.207	18.9
2015-05-25 07:30:00	0.207	18.8
2015-05-25 08:00:00	0.207	18.7
2015-05-25 08:30:00	0.207	18.6
2015-05-25 09:00:00	0.207	18.6
2015-05-25 09:30:00	0.207	18.6
2015-05-25 10:00:00	0.207	18.8
2015-05-25 10:30:00	0.207	19
2015-05-25 11:00:00	0.207	19.3
2015-05-25 11:30:00	0.207373	19.7
2015-05-25 12:00:00	0.207746	20.1
2015-05-25 12:30:00	0.207746	20.4
2015-05-25 13:00:00	0.207746	20.7
2015-05-25 13:30:00	0.208119	21
2015-05-25 14:00:00	0.208491	21.4
2015-05-25 14:30:00	0.208491	21.7
2015-05-25 15:00:00	0.208491	21.9
2015-05-25 15:30:00	0.208491	22.1
2015-05-25 16:00:00	0.208491	22.3
2015-05-25 16:30:00	0.208491	22.5
2015-05-25 17:00:00	0.208491	22.6
2015-05-25 17:30:00	0.208491	22.7
2015-05-25 18:00:00	0.208491	22.8
2015-05-25 18:30:00	0.208491	22.8
2015-05-25 19:00:00	0.208491	22.7
2015-05-25 19:30:00	0.208119	22.6
2015-05-25 20:00:00	0.208119	22.5
2015-05-25 20:30:00	0.208119	22.3
2015-05-25 21:00:00	0.208119	22.1
2015-05-25 21:30:00	0.208119	21.9
2015-05-25 22:00:00	0.207746	21.6
2015-05-25 22:30:00	0.207373	21.3
2015-05-25 23:00:00	0.207	21.1
2015-05-25 23:30:00	0.207	20.8
2015-05-26	0.206626	20.5
2015-05-26 00:30:00	0.206252	20.3
2015-05-26 01:00:00	0.206252	20
2015-05-26 01:30:00	0.205878	19.8
2015-05-26 02:00:00	0.205503	19.5
2015-05-26 02:30:00	0.205503	19.3
2015-05-26 03:00:00	0.205128	19.1
2015-05-26 03:30:00	0.205128	18.9
2015-05-26 04:00:00	0.205128	18.7
2015-05-26 04:30:00	0.204753	18.5
2015-05-26 05:00:00	0.204753	18.3
2015-05-26 05:30:00	0.204377	18.1
2015-05-26 06:00:00	0.204377	18
2015-05-26 06:30:00	0.204377	17.8
2015-05-26 07:00:00	0.204377	17.6
2015-05-26 07:30:00	0.204001	17.5
2015-05-26 08:00:00	0.204001	17.4
2015-05-26 08:30:00	0.203625	17.3
2015-05-26 09:00:00	0.204001	17.4
2015-05-26 09:30:00	0.204001	17.5
2015-05-26 10:00:00	0.204001	17.7
2015-05-26 10:30:00	0.204001	18.1
2015-05-26 11:00:00	0.204377	18.5
2015-05-26 11:30:00	0.204753	19.1
2015-05-26 12:00:00	0.205128	19.7
2015-05-26 12:30:00	0.205503	20.4
2015-05-26 13:00:00	0.205878	21.1
2015-05-26 13:30:00	0.206626	21.8
2015-05-26 14:00:00	0.207	22.5
2015-05-26 14:30:00	0.207373	23.2
2015-05-26 15:00:00	0.207746	23.8
2015-05-26 15:30:00	0.208119	24.3
2015-05-26 16:00:00	0.208491	24.7
2015-05-26 16:30:00	0.208491	24.9
2015-05-26 17:00:00	0.208491	25
2015-05-26 17:30:00	0.208491	25.1
2015-05-26 18:00:00	0.208491	25
2015-05-26 18:30:00	0.208119	25
2015-05-26 19:00:00	0.208119	24.8
2015-05-26 19:30:00	0.207746	24.6
2015-05-26 20:00:00	0.207373	24.4
2015-05-26 20:30:00	0.207373	24.1
2015-05-26 21:00:00	0.207	23.8
2015-05-26 21:30:00	0.206626	23.5
2015-05-26 22:00:00	0.206626	23.2
2015-05-26 22:30:00	0.206626	22.9
2015-05-26 23:00:00	0.206252	22.6
2015-05-26 23:30:00	0.206252	22.3
2015-05-27	0.205503	22
2015-05-27 00:30:00	0.205503	21.8
2015-05-27 01:00:00	0.205128	21.5
2015-05-27 01:30:00	0.205128	21.3
2015-05-27 02:00:00	0.204753	21
2015-05-27 02:30:00	0.204377	20.8
2015-05-27 03:00:00	0.204377	20.6
2015-05-27 03:30:00	0.204001	20.4
2015-05-27 04:00:00	0.204001	20.2
2015-05-27 04:30:00	0.203625	20
2015-05-27 05:00:00	0.203625	19.8
2015-05-27 05:30:00	0.203625	19.6
2015-05-27 06:00:00	0.203248	19.4
2015-05-27 06:30:00	0.203248	19.2
2015-05-27 07:00:00	0.203248	19.1
2015-05-27 07:30:00	0.202871	18.9
2015-05-27 08:00:00	0.202871	18.8
2015-05-27 08:30:00	0.202494	18.8
2015-05-27 09:00:00	0.202494	18.8
2015-05-27 09:30:00	0.202871	18.9
2015-05-27 10:00:00	0.202871	19.2
2015-05-27 10:30:00	0.203248	19.6
2015-05-27 11:00:00	0.203625	20.1
2015-05-27 11:30:00	0.203625	20.7
2015-05-27 12:00:00	0.204001	21.4
2015-05-27 12:30:00	0.204753	22.2
2015-05-27 13:00:00	0.205128	22.9
2015-05-27 13:30:00	0.205878	23.6
2015-05-27 14:00:00	0.206252	24.3
2015-05-27 14:30:00	0.206626	24.7
2015-05-27 15:00:00	0.206626	24.9
2015-05-27 15:30:00	0.206626	25.1
2015-05-27 16:00:00	0.206626	25.3
2015-05-27 16:30:00	0.206626	25.5
2015-05-27 17:00:00	0.207	25.7
2015-05-27 17:30:00	0.206626	25.8
2015-05-27 18:00:00	0.206626	25.8
2015-05-27 18:30:00	0.206626	25.8
2015-05-27 19:00:00	0.206626	25.7
2015-05-27 19:30:00	0.206626	25.5
2015-05-27 20:00:00	0.206626	25.3
2015-05-27 20:30:00	0.206626	25.1
2015-05-27 21:00:00	0.205878	24.8
2015-05-27 21:30:00	0.205503	24.5
2015-05-27 22:00:00	0.205503	24.3
2015-05-27 22:30:00	0.205128	24
2015-05-27 23:00:00	0.205128	23.8
2015-05-27 23:30:00	0.204753	23.5
2015-05-28	0.204753	23.3
2015-05-28 00:30:00	0.204753	23.1
2015-05-28 01:00:00	0.204001	22.8
2015-05-28 01:30:00	0.204001	22.6
2015-05-28 02:00:00	0.203625	22.4
2015-05-28 02:30:00	0.203625	22.2
2015-05-28 03:00:00	0.203248	22
2015-05-28 03:30:00	0.203248	21.8
2015-05-28 04:00:00	0.203248	21.6
2015-05-28 04:30:00	0.203248	21.4
2015-05-28 05:00:00	0.202871	21.2
2015-05-28 05:30:00	0.202871	21.1
2015-05-28 06:00:00	0.202494	20.9
2015-05-28 06:30:00	0.202494	20.7
2015-05-28 07:00:00	0.202494	20.6
2015-05-28 07:30:00	0.202116	20.4
2015-05-28 08:00:00	0.202116	20.3
2015-05-28 08:30:00	0.201738	20.2
2015-05-28 09:00:00	0.202116	20.1
2015-05-28 09:30:00	0.201738	20
2015-05-28 10:00:00	0.201738	19.9
2015-05-28 10:30:00	0.201738	19.8
2015-05-28 11:00:00	0.20136	19.8
2015-05-28 11:30:00	0.20136	19.8
2015-05-28 12:00:00	0.20136	19.8
2015-05-28 12:30:00	0.20136	19.9
2015-05-28 13:00:00	0.201738	20.1
2015-05-28 13:30:00	0.201738	20.2
2015-05-28 14:00:00	0.201738	20.4
2015-05-28 14:30:00	0.201738	20.5
2015-05-28 15:00:00	0.201738	20.7
2015-05-28 15:30:00	0.202116	20.9
2015-05-28 16:00:00	0.202116	21.1
2015-05-28 16:30:00	0.202494	21.2
2015-05-28 17:00:00	0.202494	21.3
2015-05-28 17:30:00	0.202871	21.4
2015-05-28 18:00:00	0.202871	21.4
2015-05-28 18:30:00	0.202871	21.3
2015-05-28 19:00:00	0.202494	21.3
2015-05-28 19:30:00	0.202494	21.1
2015-05-28 20:00:00	0.202116	21
2015-05-28 20:30:00	0.202116	20.8
2015-05-28 21:00:00	0.202116	20.7
2015-05-28 21:30:00	0.201738	20.5
2015-05-28 22:00:00	0.201738	20.3
2015-05-28 22:30:00	0.201738	20.2
2015-05-28 23:00:00	0.20136	20
2015-05-28 23:30:00	0.20136	19.8
2015-05-29	0.20136	19.6
2015-05-29 00:30:00	0.200981	19.4
2015-05-29 01:00:00	0.200602	19.2
2015-05-29 01:30:00	0.200602	19
2015-05-29 02:00:00	0.200981	18.9
2015-05-29 02:30:00	0.200602	18.7
2015-05-29 03:00:00	0.200602	18.6
2015-05-29 03:30:00	0.200602	18.5
2015-05-29 04:00:00	0.200223	18.3
2015-05-29 04:30:00	0.200223	18.2
2015-05-29 05:00:00	0.199843	18.1
2015-05-29 05:30:00	0.199843	18
2015-05-29 06:00:00	0.199843	17.9
2015-05-29 06:30:00	0.199843	17.8
2015-05-29 07:00:00	0.199843	17.7
2015-05-29 07:30:00	0.199843	17.6
2015-05-29 08:00:00	0.199463	17.5
2015-05-29 08:30:00	0.199843	17.5
2015-05-29 09:00:00	0.199463	17.6
2015-05-29 09:30:00	0.199843	17.7
2015-05-29 10:00:00	0.199843	17.9
2015-05-29 10:30:00	0.199843	18
2015-05-29 11:00:00	0.199843	18.2
2015-05-29 11:30:00	0.200223	18.4
2015-05-29 12:00:00	0.200223	18.6
2015-05-29 12:30:00	0.200223	18.8
2015-05-29 13:00:00	0.200602	19
2015-05-29 13:30:00	0.200223	19.2
2015-05-29 14:00:00	0.200602	19.6
2015-05-29 14:30:00	0.200981	20.1
2015-05-29 15:00:00	0.201738	20.7
2015-05-29 15:30:00	0.201738	21.2
2015-05-29 16:00:00	0.202116	21.5
2015-05-29 16:30:00	0.202116	21.8
2015-05-29 17:00:00	0.202494	22.2
2015-05-29 17:30:00	0.202871	22.5
2015-05-29 18:00:00	0.202871	22.8
2015-05-29 18:30:00	0.202871	23
2015-05-29 19:00:00	0.203248	23
2015-05-29 19:30:00	0.202871	23
2015-05-29 20:00:00	0.202871	22.9
2015-05-29 20:30:00	0.202871	22.7
2015-05-29 21:00:00	0.202494	22.4
2015-05-29 21:30:00	0.202116	22.1
2015-05-29 22:00:00	0.201738	21.8
2015-05-29 22:30:00	0.201738	21.5
2015-05-29 23:00:00	0.20136	21.2
2015-05-29 23:30:00	0.200981	20.9
2015-05-30	0.200981	20.6
2015-05-30 00:30:00	0.200602	20.3
2015-05-30 01:00:00	0.200602	20
2015-05-30 01:30:00	0.200223	19.7
2015-05-30 02:00:00	0.200223	19.4
2015-05-30 02:30:00	0.199843	19.1
2015-05-30 03:00:00	0.199843	18.9
2015-05-30 03:30:00	0.199463	18.7
2015-05-30 04:00:00	0.199083	18.5
2015-05-30 04:30:00	0.199083	18.3
2015-05-30 05:00:00	0.198703	18.1
2015-05-30 05:30:00	0.198703	18
2015-05-30 06:00:00	0.198703	17.8
2015-05-30 06:30:00	0.198703	17.6
2015-05-30 07:00:00	0.198322	17.5
2015-05-30 07:30:00	0.198322	17.3
2015-05-30 08:00:00	0.198322	17.2
2015-05-30 08:30:00	0.198322	17.2
2015-05-30 09:00:00	0.198322	17.2
2015-05-30 09:30:00	0.198322	17.4
2015-05-30 10:00:00	0.198322	17.6
2015-05-30 10:30:00	0.198322	18
2015-05-30 11:00:00	0.198703	18.4
2015-05-30 11:30:00	0.199463	19
2015-05-30 12:00:00	0.199843	19.6
2015-05-30 12:30:00	0.199843	20.1
2015-05-30 13:00:00	0.199843	20.5
2015-05-30 13:30:00	0.200223	20.9
2015-05-30 14:00:00	0.200602	21.3
2015-05-30 14:30:00	0.200981	21.9
2015-05-30 15:00:00	0.20136	22.6
2015-05-30 15:30:00	0.201738	23.2
2015-05-30 16:00:00	0.202116	23.8
2015-05-30 16:30:00	0.202494	24.2
2015-05-30 17:00:00	0.202494	24.5
2015-05-30 17:30:00	0.202871	24.7
2015-05-30 18:00:00	0.202871	24.8
2015-05-30 18:30:00	0.202871	24.9
2015-05-30 19:00:00	0.202494	24.9
2015-05-30 19:30:00	0.202494	24.8
2015-05-30 20:00:00	0.202116	24.6
2015-05-30 20:30:00	0.202116	24.4
2015-05-30 21:00:00	0.201738	24.1
2015-05-30 21:30:00	0.201738	23.8
2015-05-30 22:00:00	0.20136	23.4
2015-05-30 22:30:00	0.200981	23.1
2015-05-30 23:00:00	0.200981	22.8
2015-05-30 23:30:00	0.200602	22.4
2015-05-31	0.200223	22.1
2015-05-31 00:30:00	0.199843	21.9
2015-05-31 01:00:00	0.199843	21.6
2015-05-31 01:30:00	0.199843	21.3
2015-05-31 02:00:00	0.199463	21.1
2015-05-31 02:30:00	0.199463	20.9
2015-05-31 03:00:00	0.199463	20.7
2015-05-31 03:30:00	0.199463	20.4
2015-05-31 04:00:00	0.199083	20.2
2015-05-31 04:30:00	0.199083	20
2015-05-31 05:00:00	0.198703	19.8
2015-05-31 05:30:00	0.198703	19.6
2015-05-31 06:00:00	0.198322	19.4
2015-05-31 06:30:00	0.198322	19.3
2015-05-31 07:00:00	0.19794	19.1
2015-05-31 07:30:00	0.19794	19
2015-05-31 08:00:00	0.19794	18.9
2015-05-31 08:30:00	0.19794	18.9
2015-05-31 09:00:00	0.197559	18.9
2015-05-31 09:30:00	0.19794	19
2015-05-31 10:00:00	0.19794	19.2
2015-05-31 10:30:00	0.19794	19.5
2015-05-31 11:00:00	0.198322	19.9
2015-05-31 11:30:00	0.198322	20.3
2015-05-31 12:00:00	0.198703	20.8
2015-05-31 12:30:00	0.199083	21.3
2015-05-31 13:00:00	0.199463	21.8
2015-05-31 13:30:00	0.199843	22.2
2015-05-31 14:00:00	0.199843	22.6
2015-05-31 14:30:00	0.200223	22.9
2015-05-31 15:00:00	0.200223	23.2
2015-05-31 15:30:00	0.200223	23.4
2015-05-31 16:00:00	0.200223	23.4
2015-05-31 16:30:00	0.200223	23.5
2015-05-31 17:00:00	0.200223	23.5
2015-05-31 17:30:00	0.199843	23.5
2015-05-31 18:00:00	0.199843	23.5
2015-05-31 18:30:00	0.199843	23.4
2015-05-31 19:00:00	0.199843	23.4
2015-05-31 19:30:00	0.199463	23.3
2015-05-31 20:00:00	0.199463	23.2
2015-05-31 20:30:00	0.199463	23
2015-05-31 21:00:00	0.199463	22.8
2015-05-31 21:30:00	0.199083	22.6
2015-05-31 22:00:00	0.199083	22.4
2015-05-31 22:30:00	0.198703	22.1
2015-05-31 23:00:00	0.198703	21.9
2015-05-31 23:30:00	0.198322	21.6
2015-06-01	0.198322	21.4
2015-06-01 00:30:00	0.19794	21.2
2015-06-01 01:00:00	0.19794	21
2015-06-01 01:30:00	0.197559	20.8
2015-06-01 02:00:00	0.197559	20.6
2015-06-01 02:30:00	0.197559	20.4
2015-06-01 03:00:00	0.197177	20.2
2015-06-01 03:30:00	0.197177	20.1
2015-06-01 04:00:00	0.196794	19.9
2015-06-01 04:30:00	0.196794	19.7
2015-06-01 05:00:00	0.196794	19.5
2015-06-01 05:30:00	0.196794	19.3
2015-06-01 06:00:00	0.196794	19.2
2015-06-01 06:30:00	0.196794	19
2015-06-01 07:00:00	0.196412	18.8
2015-06-01 07:30:00	0.196412	18.7
2015-06-01 08:00:00	0.196412	18.6
2015-06-01 08:30:00	0.196029	18.5
2015-06-01 09:00:00	0.196029	18.5
2015-06-01 09:30:00	0.196029	18.6
2015-06-01 10:00:00	0.196029	18.8
2015-06-01 10:30:00	0.196029	19.2
2015-06-01 11:00:00	0.196412	19.6
2015-06-01 11:30:00	0.196794	20.2
2015-06-01 12:00:00	0.197177	20.8
2015-06-01 12:30:00	0.197559	21.5
2015-06-01 13:00:00	0.19794	22.2
2015-06-01 13:30:00	0.198322	22.9
2015-06-01 14:00:00	0.198703	23.7
2015-06-01 14:30:00	0.199463	24.3
2015-06-01 15:00:00	0.199843	25
2015-06-01 15:30:00	0.200223	25.5
2015-06-01 16:00:00	0.200223	26
2015-06-01 16:30:00	0.200602	26.5
2015-06-01 17:00:00	0.200981	26.8
2015-06-01 17:30:00	0.200981	27
2015-06-01 18:00:00	0.200981	27.1
2015-06-01 18:30:00	0.200981	27.1
2015-06-01 19:00:00	0.200602	27
2015-06-01 19:30:00	0.200223	26.8
2015-06-01 20:00:00	0.200223	26.5
2015-06-01 20:30:00	0.199843	26.2
2015-06-01 21:00:00	0.199843	25.8
2015-06-01 21:30:00	0.199463	25.4
2015-06-01 22:00:00	0.199083	25.1
2015-06-01 22:30:00	0.199083	24.7
2015-06-01 23:00:00	0.198703	24.3
2015-06-01 23:30:00	0.198322	23.9
2015-06-02	0.198322	23.6
2015-06-02 00:30:00	0.19794	23.3
2015-06-02 01:00:00	0.197177	23
2015-06-02 01:30:00	0.197177	22.6
2015-06-02 02:00:00	0.196794	22.4
2015-06-02 02:30:00	0.196794	22.1
2015-06-02 03:00:00	0.196794	21.8
2015-06-02 03:30:00	0.196412	21.6
2015-06-02 04:00:00	0.196412	21.3
2015-06-02 04:30:00	0.196029	21.1
2015-06-02 05:00:00	0.196029	20.9
2015-06-02 05:30:00	0.195646	20.6
2015-06-02 06:00:00	0.195262	20.4
2015-06-02 06:30:00	0.195262	20.2
2015-06-02 07:00:00	0.195262	20
2015-06-02 07:30:00	0.195262	19.9
2015-06-02 08:00:00	0.194878	19.7
2015-06-02 08:30:00	0.194878	19.6
2015-06-02 09:00:00	0.194878	19.5
2015-06-02 09:30:00	0.194878	19.5
2015-06-02 10:00:00	0.194878	19.5
2015-06-02 10:30:00	0.194878	19.6
2015-06-02 11:00:00	0.194878	19.7
2015-06-02 11:30:00	0.194878	19.9
2015-06-02 12:00:00	0.194878	20.3
2015-06-02 12:30:00	0.195262	20.7
2015-06-02 13:00:00	0.195262	21.3
2015-06-02 13:30:00	0.195646	21.9
2015-06-02 14:00:00	0.196412	22.5
2015-06-02 14:30:00	0.196412	23
2015-06-02 15:00:00	0.196794	23.6
2015-06-02 15:30:00	0.197177	24.1
2015-06-02 16:00:00	0.197559	24.5
2015-06-02 16:30:00	0.19794	24.8
2015-06-02 17:00:00	0.19794	25
2015-06-02 17:30:00	0.19794	25.1
2015-06-02 18:00:00	0.19794	25.2
2015-06-02 18:30:00	0.19794	25.2
2015-06-02 19:00:00	0.197559	25.2
2015-06-02 19:30:00	0.197559	25.1
2015-06-02 20:00:00	0.197177	24.9
2015-06-02 20:30:00	0.197177	24.7
2015-06-02 21:00:00	0.196794	24.4
2015-06-02 21:30:00	0.196794	24.1
2015-06-02 22:00:00	0.196412	23.9
2015-06-02 22:30:00	0.196412	23.6
2015-06-02 23:00:00	0.196029	23.3
2015-06-02 23:30:00	0.196029	23
2015-06-03	0.195646	22.8
2015-06-03 00:30:00	0.195646	22.5
2015-06-03 01:00:00	0.195646	22.3
2015-06-03 01:30:00	0.195262	22.1
2015-06-03 02:00:00	0.195262	21.9
2015-06-03 02:30:00	0.195262	21.7
2015-06-03 03:00:00	0.195262	21.6
2015-06-03 03:30:00	0.194878	21.4
2015-06-03 04:00:00	0.194878	21.3
2015-06-03 04:30:00	0.194878	21.2
2015-06-03 05:00:00	0.194878	21.1
2015-06-03 05:30:00	0.194878	20.9
2015-06-03 06:00:00	0.194494	20.8
2015-06-03 06:30:00	0.194494	20.7
2015-06-03 07:00:00	0.194494	20.6
2015-06-03 07:30:00	0.194109	20.5
2015-06-03 08:00:00	0.194109	20.4
2015-06-03 08:30:00	0.193724	20.3
2015-06-03 09:00:00	0.194109	20.3
2015-06-03 09:30:00	0.193724	20.2
2015-06-03 10:00:00	0.193724	20.2
2015-06-03 10:30:00	0.193724	20.2
2015-06-03 11:00:00	0.193724	20.1
2015-06-03 11:30:00	0.193724	20
2015-06-03 12:00:00	0.193724	20
2015-06-03 12:30:00	0.193724	19.9
2015-06-03 13:00:00	0.193724	19.9
2015-06-03 13:30:00	0.193724	19.8
2015-06-03 14:00:00	0.193339	19.8
2015-06-03 14:30:00	0.193339	19.7
2015-06-03 15:00:00	0.193339	19.7
2015-06-03 15:30:00	0.193339	19.6
2015-06-03 16:00:00	0.193339	19.6
2015-06-03 16:30:00	0.193339	19.5
2015-06-03 17:00:00	0.193339	19.4
2015-06-03 17:30:00	0.193339	19.3
2015-06-03 18:00:00	0.193339	19.3
2015-06-03 18:30:00	0.192953	19.2
2015-06-03 19:00:00	0.192953	19.1
2015-06-03 19:30:00	0.192953	19.1
2015-06-03 20:00:00	0.192953	19.1
2015-06-03 20:30:00	0.192953	19
2015-06-03 21:00:00	0.192953	18.9
2015-06-03 21:30:00	0.192953	18.9
2015-06-03 22:00:00	0.192953	18.7
2015-06-03 22:30:00	0.192953	18.6
2015-06-03 23:00:00	0.192953	18.5
2015-06-03 23:30:00	0.192953	18.4
2015-06-04	0.192953	18.4
2015-06-04 00:30:00	0.192567	18.2
2015-06-04 01:00:00	0.192567	18.1
2015-06-04 01:30:00	0.192181	18.1
2015-06-04 02:00:00	0.192181	18
2015-06-04 02:30:00	0.192181	17.9
2015-06-04 03:00:00	0.192181	17.8
2015-06-04 03:30:00	0.191795	17.7
2015-06-04 04:00:00	0.19102	17.6
2015-06-04 04:30:00	0.19102	17.5
2015-06-04 05:00:00	0.19102	17.4
2015-06-04 05:30:00	0.190633	17.2
2015-06-04 06:00:00	0.19102	17.1
2015-06-04 06:30:00	0.190633	16.9
2015-06-04 07:00:00	0.190633	16.8
2015-06-04 07:30:00	0.190633	16.6
2015-06-04 08:00:00	0.190633	16.5
2015-06-04 08:30:00	0.190633	16.3
2015-06-04 09:00:00	0.190245	16.3
2015-06-04 09:30:00	0.190245	16.3
2015-06-04 10:00:00	0.190245	16.4
2015-06-04 10:30:00	0.190245	16.6
2015-06-04 11:00:00	0.190633	16.9
2015-06-04 11:30:00	0.190633	17.3
2015-06-04 12:00:00	0.19102	17.8
2015-06-04 12:30:00	0.191795	18.3
2015-06-04 13:00:00	0.191795	18.8
2015-06-04 13:30:00	0.192181	19.4
2015-06-04 14:00:00	0.192953	19.9
2015-06-04 14:30:00	0.193339	20.5
2015-06-04 15:00:00	0.193724	21
2015-06-04 15:30:00	0.194109	21.5
2015-06-04 16:00:00	0.194494	22
2015-06-04 16:30:00	0.194878	22.3
2015-06-04 17:00:00	0.195262	22.6
2015-06-04 17:30:00	0.195262	22.8
2015-06-04 18:00:00	0.195262	23
2015-06-04 18:30:00	0.195262	23
2015-06-04 19:00:00	0.195262	23
2015-06-04 19:30:00	0.195262	22.9
2015-06-04 20:00:00	0.194878	22.7
2015-06-04 20:30:00	0.194878	22.5
2015-06-04 21:00:00	0.194878	22.3
2015-06-04 21:30:00	0.194494	22
2015-06-04 22:00:00	0.194109	21.7
2015-06-04 22:30:00	0.194109	21.4
2015-06-04 23:00:00	0.193724	21.1
2015-06-04 23:30:00	0.193724	20.8
2015-06-05	0.193339	20.5
2015-06-05 00:30:00	0.193339	20.2
2015-06-05 01:00:00	0.192953	19.9
2015-06-05 01:30:00	0.192567	19.7
2015-06-05 02:00:00	0.192567	19.4
2015-06-05 02:30:00	0.192181	19.2
2015-06-05 03:00:00	0.192181	19
2015-06-05 03:30:00	0.192181	18.7
2015-06-05 04:00:00	0.192181	18.5
2015-06-05 04:30:00	0.191795	18.3
2015-06-05 05:00:00	0.191795	18.1
2015-06-05 05:30:00	0.191795	17.9
2015-06-05 06:00:00	0.191408	17.7
2015-06-05 06:30:00	0.191408	17.6
2015-06-05 07:00:00	0.19102	17.4
2015-06-05 07:30:00	0.19102	17.3
2015-06-05 08:00:00	0.190633	17.2
2015-06-05 08:30:00	0.190633	17.1
2015-06-05 09:00:00	0.190633	17.2
2015-06-05 09:30:00	0.190633	17.3
2015-06-05 10:00:00	0.190633	17.5
2015-06-05 10:30:00	0.19102	17.9
2015-06-05 11:00:00	0.191408	18.3
2015-06-05 11:30:00	0.191408	18.8
2015-06-05 12:00:00	0.191795	19.4
2015-06-05 12:30:00	0.192181	20
2015-06-05 13:00:00	0.192953	20.6
2015-06-05 13:30:00	0.192953	21.1
2015-06-05 14:00:00	0.193339	21.6
2015-06-05 14:30:00	0.193339	22
2015-06-05 15:00:00	0.193339	22.4
2015-06-05 15:30:00	0.193724	22.9
2015-06-05 16:00:00	0.193724	23.3
2015-06-05 16:30:00	0.194109	23.7
2015-06-05 17:00:00	0.194494	24
2015-06-05 17:30:00	0.194494	24.2
2015-06-05 18:00:00	0.194494	24.3
2015-06-05 18:30:00	0.194494	24.4
2015-06-05 19:00:00	0.194494	24.4
2015-06-05 19:30:00	0.194494	24.3
2015-06-05 20:00:00	0.194109	24.2
2015-06-05 20:30:00	0.194109	24
2015-06-05 21:00:00	0.193724	23.7
2015-06-05 21:30:00	0.193724	23.4
2015-06-05 22:00:00	0.193339	23.1
2015-06-05 22:30:00	0.193339	22.8
2015-06-05 23:00:00	0.193339	22.5
2015-06-05 23:30:00	0.192567	22.2
2015-06-06	0.192567	21.9
2015-06-06 00:30:00	0.192181	21.6
2015-06-06 01:00:00	0.192181	21.3
2015-06-06 01:30:00	0.192181	21.1
2015-06-06 02:00:00	0.191795	20.9
2015-06-06 02:30:00	0.191795	20.7
2015-06-06 03:00:00	0.191795	20.5
2015-06-06 03:30:00	0.191408	20.3
2015-06-06 04:00:00	0.191408	20.1
2015-06-06 04:30:00	0.191408	20
2015-06-06 05:00:00	0.19102	19.8
2015-06-06 05:30:00	0.19102	19.6
2015-06-06 06:00:00	0.190633	19.5
2015-06-06 06:30:00	0.190633	19.3
2015-06-06 07:00:00	0.190633	19.2
2015-06-06 07:30:00	0.190245	19
2015-06-06 08:00:00	0.190245	19
2015-06-06 08:30:00	0.190245	18.9
2015-06-06 09:00:00	0.190245	18.9
2015-06-06 09:30:00	0.190245	19.1
2015-06-06 10:00:00	0.190245	19.2
2015-06-06 10:30:00	0.190245	19.5
2015-06-06 11:00:00	0.190633	19.8
2015-06-06 11:30:00	0.190633	20.2
2015-06-06 12:00:00	0.19102	20.7
2015-06-06 12:30:00	0.19102	21.1
2015-06-06 13:00:00	0.191408	21.6
2015-06-06 13:30:00	0.191795	22.1
2015-06-06 14:00:00	0.192181	22.7
2015-06-06 14:30:00	0.192181	23.2
2015-06-06 15:00:00	0.192181	23.7
2015-06-06 15:30:00	0.192567	24.1
2015-06-06 16:00:00	0.192567	24.5
2015-06-06 16:30:00	0.192953	24.8
2015-06-06 17:00:00	0.192953	25
2015-06-06 17:30:00	0.193339	25.2
2015-06-06 18:00:00	0.193339	25.4
2015-06-06 18:30:00	0.193339	25.4
2015-06-06 19:00:00	0.193724	25.4
2015-06-06 19:30:00	0.193339	25.3
2015-06-06 20:00:00	0.193339	25.2
2015-06-06 20:30:00	0.192953	25
2015-06-06 21:00:00	0.192567	24.7
2015-06-06 21:30:00	0.192567	24.4
2015-06-06 22:00:00	0.192181	24.1
2015-06-06 22:30:00	0.191795	23.8
2015-06-06 23:00:00	0.191795	23.4
2015-06-06 23:30:00	0.191408	23.1
2015-06-07	0.191408	22.8
2015-06-07 00:30:00	0.19102	22.5
2015-06-07 01:00:00	0.19102	22.2
2015-06-07 01:30:00	0.190633	21.9
2015-06-07 02:00:00	0.190245	21.6
2015-06-07 02:30:00	0.190245	21.4
2015-06-07 03:00:00	0.190245	21.1
2015-06-07 03:30:00	0.190245	20.9
2015-06-07 04:00:00	0.189857	20.7
2015-06-07 04:30:00	0.189857	20.5
2015-06-07 05:00:00	0.189468	20.3
2015-06-07 05:30:00	0.189468	20.2
2015-06-07 06:00:00	0.189468	20
2015-06-07 06:30:00	0.189079	19.9
2015-06-07 07:00:00	0.189079	19.8
2015-06-07 07:30:00	0.189079	19.7
2015-06-07 08:00:00	0.18869	19.6
2015-06-07 08:30:00	0.18869	19.5
2015-06-07 09:00:00	0.18869	19.4
2015-06-07 09:30:00	0.18869	19.3
2015-06-07 10:00:00	0.18869	19.2
2015-06-07 10:30:00	0.18869	19.2
2015-06-07 11:00:00	0.1883	19.1
2015-06-07 11:30:00	0.1883	19.1
2015-06-07 12:00:00	0.1883	19.1
2015-06-07 12:30:00	0.1883	19.2
2015-06-07 13:00:00	0.1883	19.5
2015-06-07 13:30:00	0.18869	19.9
2015-06-07 14:00:00	0.18869	20.4
2015-06-07 14:30:00	0.189079	20.9
2015-06-07 15:00:00	0.189857	21.5
2015-06-07 15:30:00	0.189857	21.9
2015-06-07 16:00:00	0.190245	22.4
2015-06-07 16:30:00	0.190245	22.8
2015-06-07 17:00:00	0.190633	23.1
2015-06-07 17:30:00	0.190633	23.4
2015-06-07 18:00:00	0.19102	23.5
2015-06-07 18:30:00	0.19102	23.6
2015-06-07 19:00:00	0.19102	23.6
2015-06-07 19:30:00	0.190633	23.6
2015-06-07 20:00:00	0.190633	23.4
2015-06-07 20:30:00	0.190633	23.3
2015-06-07 21:00:00	0.190633	23
2015-06-07 21:30:00	0.190245	22.7
2015-06-07 22:00:00	0.190245	22.4
2015-06-07 22:30:00	0.189857	22.1
2015-06-07 23:00:00	0.189857	21.8
2015-06-07 23:30:00	0.189468	21.5
2015-06-08	0.189079	21.1
2015-06-08 00:30:00	0.189079	20.8
2015-06-08 01:00:00	0.18869	20.5
2015-06-08 01:30:00	0.18869	20.3
2015-06-08 02:00:00	0.18869	20
2015-06-08 02:30:00	0.1883	19.7
2015-06-08 03:00:00	0.1883	19.4
2015-06-08 03:30:00	0.1883	19.2
2015-06-08 04:00:00	0.18791	19
2015-06-08 04:30:00	0.18791	18.8
2015-06-08 05:00:00	0.18791	18.5
2015-06-08 05:30:00	0.18752	18.3
2015-06-08 06:00:00	0.18752	18.1
2015-06-08 06:30:00	0.187129	18
2015-06-08 07:00:00	0.187129	17.8
2015-06-08 07:30:00	0.187129	17.7
2015-06-08 08:00:00	0.187129	17.6
2015-06-08 08:30:00	0.186738	17.6
2015-06-08 09:00:00	0.186738	17.6
2015-06-08 09:30:00	0.186738	17.7
2015-06-08 10:00:00	0.186738	18
2015-06-08 10:30:00	0.187129	18.3
2015-06-08 11:00:00	0.187129	18.8
2015-06-08 11:30:00	0.18752	19.3
2015-06-08 12:00:00	0.18791	19.9
2015-06-08 12:30:00	0.1883	20.6
2015-06-08 13:00:00	0.18869	21.2
2015-06-08 13:30:00	0.18869	21.9
2015-06-08 14:00:00	0.189079	22.6
2015-06-08 14:30:00	0.189857	23.3
2015-06-08 15:00:00	0.190245	24
2015-06-08 15:30:00	0.190245	24.5
2015-06-08 16:00:00	0.190633	25
2015-06-08 16:30:00	0.19102	25.5
2015-06-08 17:00:00	0.191408	25.8
2015-06-08 17:30:00	0.191408	26.1
2015-06-08 18:00:00	0.191408	26.3
2015-06-08 18:30:00	0.191408	26.3
2015-06-08 19:00:00	0.191408	26.3
2015-06-08 19:30:00	0.191408	26.2
2015-06-08 20:00:00	0.191408	26.1
2015-06-08 20:30:00	0.19102	25.8
2015-06-08 21:00:00	0.190633	25.5
2015-06-08 21:30:00	0.190633	25.2
2015-06-08 22:00:00	0.190245	24.9
2015-06-08 22:30:00	0.190245	24.6
2015-06-08 23:00:00	0.189857	24.2
2015-06-08 23:30:00	0.189857	23.9
2015-06-09	0.189468	23.6
2015-06-09 00:30:00	0.189079	23.4
2015-06-09 01:00:00	0.189079	23.1
2015-06-09 01:30:00	0.189079	22.9
2015-06-09 02:00:00	0.18869	22.7
2015-06-09 02:30:00	0.18869	22.5
2015-06-09 03:00:00	0.18869	22.3
2015-06-09 03:30:00	0.1883	22.1
2015-06-09 04:00:00	0.1883	21.9
2015-06-09 04:30:00	0.1883	21.7
2015-06-09 05:00:00	0.18791	21.6
2015-06-09 05:30:00	0.18791	21.4
2015-06-09 06:00:00	0.18791	21.2
2015-06-09 06:30:00	0.18752	21.1
2015-06-09 07:00:00	0.18752	20.9
2015-06-09 07:30:00	0.18752	20.8
2015-06-09 08:00:00	0.187129	20.7
2015-06-09 08:30:00	0.187129	20.6
2015-06-09 09:00:00	0.187129	20.6
2015-06-09 09:30:00	0.187129	20.6
2015-06-09 10:00:00	0.187129	20.7
2015-06-09 10:30:00	0.187129	20.8
2015-06-09 11:00:00	0.187129	20.9
2015-06-09 11:30:00	0.187129	21
2015-06-09 12:00:00	0.187129	21.3
2015-06-09 12:30:00	0.187129	21.6
2015-06-09 13:00:00	0.187129	21.9
2015-06-09 13:30:00	0.18752	22.4
2015-06-09 14:00:00	0.18752	22.8
2015-06-09 14:30:00	0.18791	23.3
2015-06-09 15:00:00	0.1883	23.8
2015-06-09 15:30:00	0.1883	24.2
2015-06-09 16:00:00	0.18869	24.5
2015-06-09 16:30:00	0.18869	24.8
2015-06-09 17:00:00	0.18869	25
2015-06-09 17:30:00	0.18869	25.1
2015-06-09 18:00:00	0.18869	25.1
2015-06-09 18:30:00	0.18869	25.1
2015-06-09 19:00:00	0.18869	25.1
2015-06-09 19:30:00	0.18869	25.1
2015-06-09 20:00:00	0.18869	25
2015-06-09 20:30:00	0.18869	24.8
2015-06-09 21:00:00	0.18869	24.6
2015-06-09 21:30:00	0.1883	24.4
2015-06-09 22:00:00	0.1883	24.2
2015-06-09 22:30:00	0.18791	23.9
2015-06-09 23:00:00	0.18791	23.7
2015-06-09 23:30:00	0.18752	23.4
2015-06-10	0.187129	23.1
2015-06-10 00:30:00	0.187129	22.8
2015-06-10 01:00:00	0.187129	22.6
2015-06-10 01:30:00	0.186738	22.3
2015-06-10 02:00:00	0.186738	22
2015-06-10 02:30:00	0.186347	21.7
2015-06-10 03:00:00	0.186347	21.5
2015-06-10 03:30:00	0.185955	21.3
2015-06-10 04:00:00	0.185955	21
2015-06-10 04:30:00	0.185955	20.8
2015-06-10 05:00:00	0.185563	20.6
2015-06-10 05:30:00	0.185563	20.4
2015-06-10 06:00:00	0.185563	20.2
2015-06-10 06:30:00	0.185171	20
2015-06-10 07:00:00	0.185171	19.8
2015-06-10 07:30:00	0.185171	19.7
2015-06-10 08:00:00	0.184778	19.5
2015-06-10 08:30:00	0.184778	19.4
2015-06-10 09:00:00	0.184778	19.4
2015-06-10 09:30:00	0.184778	19.4
2015-06-10 10:00:00	0.184778	19.5
2015-06-10 10:30:00	0.184778	19.7
2015-06-10 11:00:00	0.185171	20
2015-06-10 11:30:00	0.185171	20.3
2015-06-10 12:00:00	0.185563	20.7
2015-06-10 12:30:00	0.185563	21.1
2015-06-10 13:00:00	0.185955	21.5
2015-06-10 13:30:00	0.185955	21.9
2015-06-10 14:00:00	0.186347	22.2
2015-06-10 14:30:00	0.186738	22.6
2015-06-10 15:00:00	0.186738	22.9
2015-06-10 15:30:00	0.186738	23.3
2015-06-10 16:00:00	0.187129	23.6
2015-06-10 16:30:00	0.187129	23.8
2015-06-10 17:00:00	0.18752	24
2015-06-10 17:30:00	0.187129	24.1
2015-06-10 18:00:00	0.187129	24.2
2015-06-10 18:30:00	0.18752	24.3
2015-06-10 19:00:00	0.18752	24.3
2015-06-10 19:30:00	0.18752	24.3
2015-06-10 20:00:00	0.18752	24.2
2015-06-10 20:30:00	0.187129	24
2015-06-10 21:00:00	0.187129	23.7
2015-06-10 21:30:00	0.187129	23.4
2015-06-10 22:00:00	0.186738	23.1
2015-06-10 22:30:00	0.186347	22.8
2015-06-10 23:00:00	0.186347	22.5
2015-06-10 23:30:00	0.185955	22.2
2015-06-11	0.185563	21.9
2015-06-11 00:30:00	0.185563	21.6
2015-06-11 01:00:00	0.185563	21.3
2015-06-11 01:30:00	0.185171	21
2015-06-11 02:00:00	0.185171	20.7
2015-06-11 02:30:00	0.185171	20.5
2015-06-11 03:00:00	0.184778	20.2
2015-06-11 03:30:00	0.184778	19.9
2015-06-11 04:00:00	0.184385	19.7
2015-06-11 04:30:00	0.184385	19.5
2015-06-11 05:00:00	0.184385	19.3
2015-06-11 05:30:00	0.183992	19.1
2015-06-11 06:00:00	0.183992	18.9
2015-06-11 06:30:00	0.183992	18.7
2015-06-11 07:00:00	0.183992	18.5
2015-06-11 07:30:00	0.183598	18.3
2015-06-11 08:00:00	0.183598	18.2
2015-06-11 08:30:00	0.183598	18.1
2015-06-11 09:00:00	0.183204	18
2015-06-11 09:30:00	0.183204	18.1
2015-06-11 10:00:00	0.183598	18.3
2015-06-11 10:30:00	0.183598	18.6
2015-06-11 11:00:00	0.183598	19
2015-06-11 11:30:00	0.183992	19.5
2015-06-11 12:00:00	0.183992	20
2015-06-11 12:30:00	0.184385	20.7
2015-06-11 13:00:00	0.184778	21.3
2015-06-11 13:30:00	0.185563	22
2015-06-11 14:00:00	0.185563	22.7
2015-06-11 14:30:00	0.185955	23.3
[truncated: 6,834 more rows]
