# Supplementary material for: Linking diffuse radiation and ecosystem productivity of a desert steppe ecosystem
Source: PeerJ. 2020 May 5;8:e9043. doi: 10.7717/peerj.9043 (PMC7207212; doi:10.7717/peerj.9043)
Supplement: Supplemental Information 8 — VWC soil volumetric water content in units of m3 m −3, port 1, 10 cm; port 2, 30 cm; port 3, 70 cm; port 4, 120 cm; port 5, 10 cm [file peerj-08-9043-s008.xls]

## Sheet: Sheet1
yc_2_em50_3_full	Port 1	Port 1
Measurement Time	SWC	Temp
2015-05-01	0.0958997	16
2015-05-01 00:30:00	0.0958997	15.7
2015-05-01 01:00:00	0.0954321	15.5
2015-05-01 01:30:00	0.0954321	15.3
2015-05-01 02:00:00	0.0954321	15.1
2015-05-01 02:30:00	0.0949642	15
2015-05-01 03:00:00	0.0949642	14.8
2015-05-01 03:30:00	0.0949642	14.6
2015-05-01 04:00:00	0.0944958	14.5
2015-05-01 04:30:00	0.0944958	14.3
2015-05-01 05:00:00	0.0944958	14.1
2015-05-01 05:30:00	0.0944958	14
2015-05-01 06:00:00	0.0940271	13.8
2015-05-01 06:30:00	0.0940271	13.7
2015-05-01 07:00:00	0.0940271	13.5
2015-05-01 07:30:00	0.0940271	13.3
2015-05-01 08:00:00	0.0940271	13.2
2015-05-01 08:30:00	0.0935581	13.2
2015-05-01 09:00:00	0.0940271	13.2
2015-05-01 09:30:00	0.0940271	13.4
2015-05-01 10:00:00	0.0940271	13.6
2015-05-01 10:30:00	0.0940271	13.9
2015-05-01 11:00:00	0.0944958	14.4
2015-05-01 11:30:00	0.0949642	14.9
2015-05-01 12:00:00	0.0954321	15.5
2015-05-01 12:30:00	0.0958997	16.2
2015-05-01 13:00:00	0.0963668	17
2015-05-01 13:30:00	0.0973	17.7
2015-05-01 14:00:00	0.0977661	18.4
2015-05-01 14:30:00	0.0977661	19
2015-05-01 15:00:00	0.0982317	19.6
2015-05-01 15:30:00	0.098697	20.2
2015-05-01 16:00:00	0.0991619	20.7
2015-05-01 16:30:00	0.0996264	21.2
2015-05-01 17:00:00	0.0996264	21.6
2015-05-01 17:30:00	0.100091	21.9
2015-05-01 18:00:00	0.100091	22
2015-05-01 18:30:00	0.100091	21.9
2015-05-01 19:00:00	0.0996264	21.8
2015-05-01 19:30:00	0.0996264	21.4
2015-05-01 20:00:00	0.0991619	21
2015-05-01 20:30:00	0.098697	20.5
2015-05-01 21:00:00	0.098697	20
2015-05-01 21:30:00	0.0977661	19.5
2015-05-01 22:00:00	0.0973	19
2015-05-01 22:30:00	0.0973	18.6
2015-05-01 23:00:00	0.0968336	18.1
2015-05-01 23:30:00	0.0963668	17.7
2015-05-02	0.0963668	17.3
2015-05-02 00:30:00	0.0958997	17
2015-05-02 01:00:00	0.0958997	16.7
2015-05-02 01:30:00	0.0954321	16.4
2015-05-02 02:00:00	0.0954321	16
2015-05-02 02:30:00	0.0954321	15.8
2015-05-02 03:00:00	0.0949642	15.5
2015-05-02 03:30:00	0.0949642	15.2
2015-05-02 04:00:00	0.0944958	15
2015-05-02 04:30:00	0.0940271	14.8
2015-05-02 05:00:00	0.0940271	14.6
2015-05-02 05:30:00	0.0940271	14.4
2015-05-02 06:00:00	0.0940271	14.2
2015-05-02 06:30:00	0.0940271	14
2015-05-02 07:00:00	0.0935581	13.8
2015-05-02 07:30:00	0.0935581	13.7
2015-05-02 08:00:00	0.0935581	13.6
2015-05-02 08:30:00	0.0935581	13.6
2015-05-02 09:00:00	0.0935581	13.7
2015-05-02 09:30:00	0.0935581	13.8
2015-05-02 10:00:00	0.0935581	14.1
2015-05-02 10:30:00	0.0940271	14.4
2015-05-02 11:00:00	0.0940271	14.8
2015-05-02 11:30:00	0.0940271	15.3
2015-05-02 12:00:00	0.0949642	15.8
2015-05-02 12:30:00	0.0949642	16.3
2015-05-02 13:00:00	0.0954321	16.9
2015-05-02 13:30:00	0.0958997	17.4
2015-05-02 14:00:00	0.0958997	17.8
2015-05-02 14:30:00	0.0963668	18.1
2015-05-02 15:00:00	0.0963668	18.3
2015-05-02 15:30:00	0.0968336	18.4
2015-05-02 16:00:00	0.0963668	18.4
2015-05-02 16:30:00	0.0963668	18.4
2015-05-02 17:00:00	0.0963668	18.4
2015-05-02 17:30:00	0.0963668	18.4
2015-05-02 18:00:00	0.0963668	18.3
2015-05-02 18:30:00	0.0963668	18.2
2015-05-02 19:00:00	0.0963668	18.1
2015-05-02 19:30:00	0.0963668	17.9
2015-05-02 20:00:00	0.0958997	17.7
2015-05-02 20:30:00	0.0958997	17.5
2015-05-02 21:00:00	0.0954321	17.3
2015-05-02 21:30:00	0.0954321	17
2015-05-02 22:00:00	0.0954321	16.8
2015-05-02 22:30:00	0.0949642	16.6
2015-05-02 23:00:00	0.0949642	16.4
2015-05-02 23:30:00	0.0949642	16.3
2015-05-03	0.0949642	16.1
2015-05-03 00:30:00	0.0944958	15.9
2015-05-03 01:00:00	0.0944958	15.8
2015-05-03 01:30:00	0.0940271	15.6
2015-05-03 02:00:00	0.0940271	15.5
2015-05-03 02:30:00	0.0940271	15.4
2015-05-03 03:00:00	0.0940271	15.2
2015-05-03 03:30:00	0.0940271	15.1
2015-05-03 04:00:00	0.0940271	15
2015-05-03 04:30:00	0.0940271	14.8
2015-05-03 05:00:00	0.0940271	14.6
2015-05-03 05:30:00	0.0935581	14.5
2015-05-03 06:00:00	0.0935581	14.3
2015-05-03 06:30:00	0.0930886	14.1
2015-05-03 07:00:00	0.0930886	13.9
2015-05-03 07:30:00	0.0930886	13.7
2015-05-03 08:00:00	0.0930886	13.6
2015-05-03 08:30:00	0.0926188	13.6
2015-05-03 09:00:00	0.0926188	13.6
2015-05-03 09:30:00	0.0930886	13.7
2015-05-03 10:00:00	0.0930886	14
2015-05-03 10:30:00	0.0930886	14.3
2015-05-03 11:00:00	0.0935581	14.7
2015-05-03 11:30:00	0.0935581	15.1
2015-05-03 12:00:00	0.0940271	15.6
2015-05-03 12:30:00	0.0944958	16.3
2015-05-03 13:00:00	0.0949642	17
2015-05-03 13:30:00	0.0958997	17.8
2015-05-03 14:00:00	0.0958997	18.6
2015-05-03 14:30:00	0.0968336	19.3
2015-05-03 15:00:00	0.0968336	19.9
2015-05-03 15:30:00	0.0973	20.4
2015-05-03 16:00:00	0.0977661	20.9
2015-05-03 16:30:00	0.0977661	21.2
2015-05-03 17:00:00	0.0982317	21.4
2015-05-03 17:30:00	0.0982317	21.5
2015-05-03 18:00:00	0.0982317	21.5
2015-05-03 18:30:00	0.0977661	21.4
2015-05-03 19:00:00	0.0973	21.2
2015-05-03 19:30:00	0.0973	20.9
2015-05-03 20:00:00	0.0973	20.5
2015-05-03 20:30:00	0.0968336	20.1
2015-05-03 21:00:00	0.0963668	19.6
2015-05-03 21:30:00	0.0958997	19.2
2015-05-03 22:00:00	0.0954321	18.7
2015-05-03 22:30:00	0.0954321	18.3
2015-05-03 23:00:00	0.0949642	17.9
2015-05-03 23:30:00	0.0944958	17.5
2015-05-04	0.0944958	17.1
2015-05-04 00:30:00	0.0940271	16.8
2015-05-04 01:00:00	0.0940271	16.4
2015-05-04 01:30:00	0.0940271	16.1
2015-05-04 02:00:00	0.0935581	15.7
2015-05-04 02:30:00	0.0930886	15.4
2015-05-04 03:00:00	0.0930886	15.1
2015-05-04 03:30:00	0.0930886	14.8
2015-05-04 04:00:00	0.0926188	14.5
2015-05-04 04:30:00	0.0926188	14.3
2015-05-04 05:00:00	0.0926188	14
2015-05-04 05:30:00	0.0921485	13.7
2015-05-04 06:00:00	0.0921485	13.5
2015-05-04 06:30:00	0.0916779	13.2
2015-05-04 07:00:00	0.0916779	13
2015-05-04 07:30:00	0.0912069	12.8
2015-05-04 08:00:00	0.0912069	12.7
2015-05-04 08:30:00	0.0912069	12.7
2015-05-04 09:00:00	0.0912069	12.8
2015-05-04 09:30:00	0.0912069	13.1
2015-05-04 10:00:00	0.0916779	13.5
2015-05-04 10:30:00	0.0916779	13.9
2015-05-04 11:00:00	0.0921485	14.5
2015-05-04 11:30:00	0.0926188	15.2
2015-05-04 12:00:00	0.0930886	16
2015-05-04 12:30:00	0.0940271	16.8
2015-05-04 13:00:00	0.0944958	17.5
2015-05-04 13:30:00	0.0949642	18.4
2015-05-04 14:00:00	0.0954321	19.1
2015-05-04 14:30:00	0.0954321	19.8
2015-05-04 15:00:00	0.0958997	20.3
2015-05-04 15:30:00	0.0958997	20.7
2015-05-04 16:00:00	0.0963668	21
2015-05-04 16:30:00	0.0963668	21.2
2015-05-04 17:00:00	0.0968336	21.5
2015-05-04 17:30:00	0.0968336	21.7
2015-05-04 18:00:00	0.0968336	21.7
2015-05-04 18:30:00	0.0968336	21.7
2015-05-04 19:00:00	0.0968336	21.5
2015-05-04 19:30:00	0.0963668	21.3
2015-05-04 20:00:00	0.0963668	21
2015-05-04 20:30:00	0.0958997	20.6
2015-05-04 21:00:00	0.0954321	20.2
2015-05-04 21:30:00	0.0954321	19.8
2015-05-04 22:00:00	0.0949642	19.4
2015-05-04 22:30:00	0.0944958	19.1
2015-05-04 23:00:00	0.0944958	18.8
2015-05-04 23:30:00	0.0940271	18.5
2015-05-05	0.0940271	18.1
2015-05-05 00:30:00	0.0940271	17.9
2015-05-05 01:00:00	0.0935581	17.6
2015-05-05 01:30:00	0.0935581	17.4
2015-05-05 02:00:00	0.0930886	17.2
2015-05-05 02:30:00	0.0930886	16.9
2015-05-05 03:00:00	0.0930886	16.7
2015-05-05 03:30:00	0.0926188	16.6
2015-05-05 04:00:00	0.0926188	16.4
2015-05-05 04:30:00	0.0926188	16.2
2015-05-05 05:00:00	0.0926188	16
2015-05-05 05:30:00	0.0921485	15.8
2015-05-05 06:00:00	0.0921485	15.6
2015-05-05 06:30:00	0.0921485	15.4
2015-05-05 07:00:00	0.0921485	15.3
2015-05-05 07:30:00	0.0916779	15.1
2015-05-05 08:00:00	0.0916779	15.1
2015-05-05 08:30:00	0.0916779	15.1
2015-05-05 09:00:00	0.0916779	15.2
2015-05-05 09:30:00	0.0916779	15.4
2015-05-05 10:00:00	0.0916779	15.7
2015-05-05 10:30:00	0.0921485	16.1
2015-05-05 11:00:00	0.0921485	16.6
2015-05-05 11:30:00	0.0926188	17.1
2015-05-05 12:00:00	0.0926188	17.6
2015-05-05 12:30:00	0.0930886	18
2015-05-05 13:00:00	0.0935581	18.5
2015-05-05 13:30:00	0.0935581	18.8
2015-05-05 14:00:00	0.0940271	19.2
2015-05-05 14:30:00	0.0940271	19.4
2015-05-05 15:00:00	0.0940271	19.6
2015-05-05 15:30:00	0.0940271	19.7
2015-05-05 16:00:00	0.0940271	19.6
2015-05-05 16:30:00	0.0940271	19.6
2015-05-05 17:00:00	0.0940271	19.7
2015-05-05 17:30:00	0.0935581	19.7
2015-05-05 18:00:00	0.0935581	19.6
2015-05-05 18:30:00	0.0935581	19.5
2015-05-05 19:00:00	0.0935581	19.3
2015-05-05 19:30:00	0.0930886	19.2
2015-05-05 20:00:00	0.0930886	18.9
2015-05-05 20:30:00	0.0926188	18.7
2015-05-05 21:00:00	0.0926188	18.4
2015-05-05 21:30:00	0.0926188	18.1
2015-05-05 22:00:00	0.0921485	17.9
2015-05-05 22:30:00	0.0921485	17.6
2015-05-05 23:00:00	0.0916779	17.3
2015-05-05 23:30:00	0.0916779	17
2015-05-06	0.0912069	16.7
2015-05-06 00:30:00	0.0912069	16.4
2015-05-06 01:00:00	0.0907355	16.1
2015-05-06 01:30:00	0.0907355	15.8
2015-05-06 02:00:00	0.0907355	15.6
2015-05-06 02:30:00	0.0902638	15.3
2015-05-06 03:00:00	0.0902638	15.1
2015-05-06 03:30:00	0.0897916	14.9
2015-05-06 04:00:00	0.0897916	14.7
2015-05-06 04:30:00	0.0897916	14.5
2015-05-06 05:00:00	0.0897916	14.3
2015-05-06 05:30:00	0.0897916	14.1
2015-05-06 06:00:00	0.0893191	13.9
2015-05-06 06:30:00	0.0888462	13.7
2015-05-06 07:00:00	0.0888462	13.5
2015-05-06 07:30:00	0.0888462	13.3
2015-05-06 08:00:00	0.0888462	13.3
2015-05-06 08:30:00	0.0888462	13.3
2015-05-06 09:00:00	0.0888462	13.5
2015-05-06 09:30:00	0.0883729	13.7
2015-05-06 10:00:00	0.0893191	14
2015-05-06 10:30:00	0.0893191	14.3
2015-05-06 11:00:00	0.0893191	14.7
2015-05-06 11:30:00	0.0897916	15.2
2015-05-06 12:00:00	0.0902638	15.9
2015-05-06 12:30:00	0.0902638	16.5
2015-05-06 13:00:00	0.0907355	17.1
2015-05-06 13:30:00	0.0912069	17.6
2015-05-06 14:00:00	0.0912069	18
2015-05-06 14:30:00	0.0916779	18.2
2015-05-06 15:00:00	0.0916779	18.4
2015-05-06 15:30:00	0.0916779	18.6
2015-05-06 16:00:00	0.0916779	18.6
2015-05-06 16:30:00	0.0916779	18.7
2015-05-06 17:00:00	0.0916779	18.6
2015-05-06 17:30:00	0.0912069	18.5
2015-05-06 18:00:00	0.0912069	18.4
2015-05-06 18:30:00	0.0912069	18.4
2015-05-06 19:00:00	0.0912069	18.3
2015-05-06 19:30:00	0.0912069	18.2
2015-05-06 20:00:00	0.0907355	18
2015-05-06 20:30:00	0.0907355	17.8
2015-05-06 21:00:00	0.0907355	17.5
2015-05-06 21:30:00	0.0902638	17.2
2015-05-06 22:00:00	0.0897916	16.8
2015-05-06 22:30:00	0.0897916	16.5
2015-05-06 23:00:00	0.0893191	16.2
2015-05-06 23:30:00	0.0893191	15.9
2015-05-07	0.0893191	15.6
2015-05-07 00:30:00	0.0888462	15.3
2015-05-07 01:00:00	0.0888462	15
2015-05-07 01:30:00	0.0883729	14.8
2015-05-07 02:00:00	0.0883729	14.6
2015-05-07 02:30:00	0.0883729	14.4
2015-05-07 03:00:00	0.0878992	14.2
2015-05-07 03:30:00	0.0878992	14
2015-05-07 04:00:00	0.0878992	13.9
2015-05-07 04:30:00	0.0878992	13.8
2015-05-07 05:00:00	0.0874251	13.6
2015-05-07 05:30:00	0.0874251	13.6
2015-05-07 06:00:00	0.0874251	13.4
2015-05-07 06:30:00	0.0869507	13.4
2015-05-07 07:00:00	0.0874251	13.3
2015-05-07 07:30:00	0.0874251	13.2
2015-05-07 08:00:00	0.0869507	13.2
2015-05-07 08:30:00	0.0869507	13.2
2015-05-07 09:00:00	0.0869507	13.2
2015-05-07 09:30:00	0.0869507	13.3
2015-05-07 10:00:00	0.0869507	13.4
2015-05-07 10:30:00	0.0869507	13.4
2015-05-07 11:00:00	0.0869507	13.5
2015-05-07 11:30:00	0.0869507	13.6
2015-05-07 12:00:00	0.0869507	13.6
2015-05-07 12:30:00	0.0869507	13.7
2015-05-07 13:00:00	0.0869507	13.8
2015-05-07 13:30:00	0.0874251	14
2015-05-07 14:00:00	0.0874251	14.2
2015-05-07 14:30:00	0.0874251	14.4
2015-05-07 15:00:00	0.0874251	14.5
2015-05-07 15:30:00	0.0878992	14.6
2015-05-07 16:00:00	0.0878992	14.8
2015-05-07 16:30:00	0.0878992	14.9
2015-05-07 17:00:00	0.0878992	15.1
2015-05-07 17:30:00	0.0878992	15.2
2015-05-07 18:00:00	0.0878992	15.3
2015-05-07 18:30:00	0.0883729	15.3
2015-05-07 19:00:00	0.0878992	15.4
2015-05-07 19:30:00	0.0878992	15.3
2015-05-07 20:00:00	0.0878992	15.2
2015-05-07 20:30:00	0.0878992	15
2015-05-07 21:00:00	0.0874251	14.8
2015-05-07 21:30:00	0.0874251	14.6
2015-05-07 22:00:00	0.0874251	14.3
2015-05-07 22:30:00	0.0874251	14.1
2015-05-07 23:00:00	0.0869507	13.9
2015-05-07 23:30:00	0.0869507	13.7
2015-05-08	0.0869507	13.5
2015-05-08 00:30:00	0.0864758	13.3
2015-05-08 01:00:00	0.0864758	13.1
2015-05-08 01:30:00	0.0864758	13
2015-05-08 02:00:00	0.0860006	12.9
2015-05-08 02:30:00	0.0860006	12.7
2015-05-08 03:00:00	0.0860006	12.6
2015-05-08 03:30:00	0.0860006	12.5
2015-05-08 04:00:00	0.0860006	12.3
2015-05-08 04:30:00	0.0860006	12.2
2015-05-08 05:00:00	0.0860006	12.1
2015-05-08 05:30:00	0.085525	12
2015-05-08 06:00:00	0.085525	11.9
2015-05-08 06:30:00	0.085525	11.8
2015-05-08 07:00:00	0.085525	11.8
2015-05-08 07:30:00	0.085525	11.7
2015-05-08 08:00:00	0.085525	11.7
2015-05-08 08:30:00	0.085049	11.8
2015-05-08 09:00:00	0.085525	12
2015-05-08 09:30:00	0.085525	12.3
2015-05-08 10:00:00	0.085525	12.7
2015-05-08 10:30:00	0.0860006	13.3
2015-05-08 11:00:00	0.0864758	13.9
2015-05-08 11:30:00	0.0869507	14.6
2015-05-08 12:00:00	0.0874251	15.2
2015-05-08 12:30:00	0.0874251	15.7
2015-05-08 13:00:00	0.0878992	16.1
2015-05-08 13:30:00	0.0883729	16.6
2015-05-08 14:00:00	0.0883729	17
2015-05-08 14:30:00	0.0883729	17.3
2015-05-08 15:00:00	0.0888462	17.6
2015-05-08 15:30:00	0.0888462	17.9
2015-05-08 16:00:00	0.0888462	18
2015-05-08 16:30:00	0.0888462	18.1
2015-05-08 17:00:00	0.0888462	18.3
2015-05-08 17:30:00	0.0893191	18.5
2015-05-08 18:00:00	0.0893191	18.7
2015-05-08 18:30:00	0.0893191	18.8
2015-05-08 19:00:00	0.0888462	18.7
2015-05-08 19:30:00	0.0893191	18.6
2015-05-08 20:00:00	0.0888462	18.4
2015-05-08 20:30:00	0.0888462	18.2
2015-05-08 21:00:00	0.0883729	18
2015-05-08 21:30:00	0.0883729	17.7
2015-05-08 22:00:00	0.0883729	17.5
2015-05-08 22:30:00	0.0878992	17.2
2015-05-08 23:00:00	0.0878992	17
2015-05-08 23:30:00	0.0874251	16.8
2015-05-09	0.0874251	16.6
2015-05-09 00:30:00	0.0874251	16.5
2015-05-09 01:00:00	0.0874251	16.3
2015-05-09 01:30:00	0.0869507	16.2
2015-05-09 02:00:00	0.0869507	16
2015-05-09 02:30:00	0.0869507	15.9
2015-05-09 03:00:00	0.0864758	15.7
2015-05-09 03:30:00	0.0864758	15.5
2015-05-09 04:00:00	0.0864758	15.3
2015-05-09 04:30:00	0.0864758	15.1
2015-05-09 05:00:00	0.0860006	14.9
2015-05-09 05:30:00	0.0860006	14.7
2015-05-09 06:00:00	0.0860006	14.5
2015-05-09 06:30:00	0.085525	14.3
2015-05-09 07:00:00	0.085525	14.1
2015-05-09 07:30:00	0.085525	13.9
2015-05-09 08:00:00	0.085525	13.9
2015-05-09 08:30:00	0.085525	13.9
2015-05-09 09:00:00	0.085525	14
2015-05-09 09:30:00	0.085525	14.2
2015-05-09 10:00:00	0.085525	14.6
2015-05-09 10:30:00	0.0860006	15.1
2015-05-09 11:00:00	0.0860006	15.7
2015-05-09 11:30:00	0.0864758	16.3
2015-05-09 12:00:00	0.0869507	17
2015-05-09 12:30:00	0.0874251	17.7
2015-05-09 13:00:00	0.0878992	18.5
2015-05-09 13:30:00	0.0883729	19.1
2015-05-09 14:00:00	0.0883729	19.8
2015-05-09 14:30:00	0.0888462	20.3
2015-05-09 15:00:00	0.0893191	20.9
2015-05-09 15:30:00	0.0897916	21.3
2015-05-09 16:00:00	0.0897916	21.8
2015-05-09 16:30:00	0.0897916	22
2015-05-09 17:00:00	0.0897916	22.2
2015-05-09 17:30:00	0.0897916	22.3
2015-05-09 18:00:00	0.0897916	22.3
2015-05-09 18:30:00	0.0897916	22.3
2015-05-09 19:00:00	0.0897916	22.2
2015-05-09 19:30:00	0.0897916	22
2015-05-09 20:00:00	0.0897916	21.7
2015-05-09 20:30:00	0.0893191	21.4
2015-05-09 21:00:00	0.0893191	21.1
2015-05-09 21:30:00	0.0888462	20.7
2015-05-09 22:00:00	0.0883729	20.4
2015-05-09 22:30:00	0.0883729	20.1
2015-05-09 23:00:00	0.0883729	19.9
2015-05-09 23:30:00	0.0878992	19.6
2015-05-10	0.0878992	19.4
2015-05-10 00:30:00	0.0878992	19.3
2015-05-10 01:00:00	0.0874251	19.1
2015-05-10 01:30:00	0.0874251	18.9
2015-05-10 02:00:00	0.0874251	18.7
2015-05-10 02:30:00	0.0869507	18.6
2015-05-10 03:00:00	0.0869507	18.4
2015-05-10 03:30:00	0.0869507	18.2
2015-05-10 04:00:00	0.0864758	18
2015-05-10 04:30:00	0.0864758	17.8
2015-05-10 05:00:00	0.0864758	17.6
2015-05-10 05:30:00	0.0864758	17.4
2015-05-10 06:00:00	0.0860006	17.1
2015-05-10 06:30:00	0.085525	16.8
2015-05-10 07:00:00	0.085525	16.3
2015-05-10 07:30:00	0.085049	15.8
2015-05-10 08:00:00	0.085049	15.2
2015-05-10 08:30:00	0.085525	14.7
2015-05-10 09:00:00	0.0874251	14.4
2015-05-10 09:30:00	0.0916779	14.1
2015-05-10 10:00:00	0.0963668	14
2015-05-10 10:30:00	0.100554	13.9
2015-05-10 11:00:00	0.103329	13.7
2015-05-10 11:30:00	0.105631	13.6
2015-05-10 12:00:00	0.107007	13.6
2015-05-10 12:30:00	0.10838	13.6
2015-05-10 13:00:00	0.108837	13.8
2015-05-10 13:30:00	0.10975	14.1
2015-05-10 14:00:00	0.10975	14.2
2015-05-10 14:30:00	0.110206	14.5
2015-05-10 15:00:00	0.110206	14.7
2015-05-10 15:30:00	0.110206	14.7
2015-05-10 16:00:00	0.110206	14.9
2015-05-10 16:30:00	0.10975	14.9
2015-05-10 17:00:00	0.10975	14.9
2015-05-10 17:30:00	0.109294	14.8
2015-05-10 18:00:00	0.109294	14.8
2015-05-10 18:30:00	0.109294	14.7
2015-05-10 19:00:00	0.108837	14.6
2015-05-10 19:30:00	0.10838	14.3
2015-05-10 20:00:00	0.107923	14
2015-05-10 20:30:00	0.107923	13.7
2015-05-10 21:00:00	0.107465	13.3
2015-05-10 21:30:00	0.107007	13
2015-05-10 22:00:00	0.106549	12.6
2015-05-10 22:30:00	0.10609	12.2
2015-05-10 23:00:00	0.105631	11.8
2015-05-10 23:30:00	0.105171	11.5
2015-05-11	0.104711	11.2
2015-05-11 00:30:00	0.104711	10.9
2015-05-11 01:00:00	0.104251	10.6
2015-05-11 01:30:00	0.10379	10.3
2015-05-11 02:00:00	0.10379	10
2015-05-11 02:30:00	0.103329	9.7
2015-05-11 03:00:00	0.102867	9.4
2015-05-11 03:30:00	0.102867	9.2
2015-05-11 04:00:00	0.102405	8.9
2015-05-11 04:30:00	0.102405	8.7
2015-05-11 05:00:00	0.101943	8.4
2015-05-11 05:30:00	0.101481	8.2
2015-05-11 06:00:00	0.101481	8
2015-05-11 06:30:00	0.101481	7.8
2015-05-11 07:00:00	0.101018	7.7
2015-05-11 07:30:00	0.101018	7.5
2015-05-11 08:00:00	0.100554	7.5
2015-05-11 08:30:00	0.100554	7.7
2015-05-11 09:00:00	0.101018	7.9
2015-05-11 09:30:00	0.101018	8.3
2015-05-11 10:00:00	0.101018	8.8
2015-05-11 10:30:00	0.101481	9.4
2015-05-11 11:00:00	0.101943	10.2
2015-05-11 11:30:00	0.102405	10.9
2015-05-11 12:00:00	0.102405	11.6
2015-05-11 12:30:00	0.103329	12.3
2015-05-11 13:00:00	0.10379	13.1
2015-05-11 13:30:00	0.104251	13.7
2015-05-11 14:00:00	0.104251	14.3
2015-05-11 14:30:00	0.104711	14.9
2015-05-11 15:00:00	0.105171	15.6
2015-05-11 15:30:00	0.105631	16.3
2015-05-11 16:00:00	0.10609	16.9
2015-05-11 16:30:00	0.10609	17.4
2015-05-11 17:00:00	0.106549	17.7
2015-05-11 17:30:00	0.10609	18
2015-05-11 18:00:00	0.10609	18
2015-05-11 18:30:00	0.10609	18
2015-05-11 19:00:00	0.10609	17.8
2015-05-11 19:30:00	0.105631	17.5
2015-05-11 20:00:00	0.105171	17.1
2015-05-11 20:30:00	0.104711	16.7
2015-05-11 21:00:00	0.104251	16.2
2015-05-11 21:30:00	0.10379	15.7
2015-05-11 22:00:00	0.103329	15.2
2015-05-11 22:30:00	0.102867	14.8
2015-05-11 23:00:00	0.102405	14.4
2015-05-11 23:30:00	0.101943	13.9
2015-05-12	0.101943	13.5
2015-05-12 00:30:00	0.101481	13.1
2015-05-12 01:00:00	0.101481	12.7
2015-05-12 01:30:00	0.101018	12.3
2015-05-12 02:00:00	0.100554	11.9
2015-05-12 02:30:00	0.100554	11.6
2015-05-12 03:00:00	0.100091	11.3
2015-05-12 03:30:00	0.0996264	11
2015-05-12 04:00:00	0.0996264	10.7
2015-05-12 04:30:00	0.0991619	10.4
2015-05-12 05:00:00	0.098697	10.1
2015-05-12 05:30:00	0.098697	9.9
2015-05-12 06:00:00	0.098697	9.6
2015-05-12 06:30:00	0.0982317	9.3
2015-05-12 07:00:00	0.0982317	9.1
2015-05-12 07:30:00	0.0977661	9
2015-05-12 08:00:00	0.0977661	9
2015-05-12 08:30:00	0.0982317	9.2
2015-05-12 09:00:00	0.0982317	9.6
2015-05-12 09:30:00	0.0982317	10.2
2015-05-12 10:00:00	0.098697	10.9
2015-05-12 10:30:00	0.0991619	11.8
2015-05-12 11:00:00	0.100091	12.7
2015-05-12 11:30:00	0.100554	13.8
2015-05-12 12:00:00	0.101018	14.9
2015-05-12 12:30:00	0.101943	15.9
2015-05-12 13:00:00	0.102405	16.9
2015-05-12 13:30:00	0.103329	17.9
2015-05-12 14:00:00	0.10379	18.9
2015-05-12 14:30:00	0.104251	19.7
2015-05-12 15:00:00	0.104711	20.4
2015-05-12 15:30:00	0.105171	21
2015-05-12 16:00:00	0.105171	21.5
2015-05-12 16:30:00	0.105631	21.8
2015-05-12 17:00:00	0.105631	22
2015-05-12 17:30:00	0.105631	21.9
2015-05-12 18:00:00	0.105171	21.9
2015-05-12 18:30:00	0.105171	21.8
2015-05-12 19:00:00	0.104711	21.6
2015-05-12 19:30:00	0.104711	21.4
2015-05-12 20:00:00	0.104711	21
2015-05-12 20:30:00	0.104251	20.5
2015-05-12 21:00:00	0.103329	19.9
2015-05-12 21:30:00	0.102867	19.3
2015-05-12 22:00:00	0.102405	18.8
2015-05-12 22:30:00	0.101943	18.2
2015-05-12 23:00:00	0.101481	17.8
2015-05-12 23:30:00	0.101481	17.3
2015-05-13	0.101018	16.9
2015-05-13 00:30:00	0.100554	16.6
2015-05-13 01:00:00	0.100554	16.2
2015-05-13 01:30:00	0.100091	16
2015-05-13 02:00:00	0.100091	15.7
2015-05-13 02:30:00	0.0996264	15.4
2015-05-13 03:00:00	0.0991619	15.2
2015-05-13 03:30:00	0.0991619	15
2015-05-13 04:00:00	0.0991619	14.7
2015-05-13 04:30:00	0.098697	14.5
2015-05-13 05:00:00	0.098697	14.3
2015-05-13 05:30:00	0.0982317	14
2015-05-13 06:00:00	0.0982317	13.8
2015-05-13 06:30:00	0.0982317	13.6
2015-05-13 07:00:00	0.0977661	13.5
2015-05-13 07:30:00	0.0977661	13.4
2015-05-13 08:00:00	0.0973	13.4
2015-05-13 08:30:00	0.0977661	13.6
2015-05-13 09:00:00	0.0977661	13.9
2015-05-13 09:30:00	0.0977661	14.3
2015-05-13 10:00:00	0.0982317	14.8
2015-05-13 10:30:00	0.0982317	15.2
2015-05-13 11:00:00	0.098697	15.8
2015-05-13 11:30:00	0.0991619	16.5
2015-05-13 12:00:00	0.0996264	17.3
2015-05-13 12:30:00	0.100091	18.2
2015-05-13 13:00:00	0.100554	19
2015-05-13 13:30:00	0.101018	19.8
2015-05-13 14:00:00	0.101481	20.5
2015-05-13 14:30:00	0.101943	21.3
2015-05-13 15:00:00	0.101943	22
2015-05-13 15:30:00	0.102405	22.5
2015-05-13 16:00:00	0.102405	22.8
2015-05-13 16:30:00	0.102867	23.1
2015-05-13 17:00:00	0.102867	23.1
2015-05-13 17:30:00	0.102405	23.1
2015-05-13 18:00:00	0.102405	23.1
2015-05-13 18:30:00	0.102405	22.9
2015-05-13 19:00:00	0.101943	22.7
2015-05-13 19:30:00	0.101943	22.4
2015-05-13 20:00:00	0.101481	22
2015-05-13 20:30:00	0.101481	21.6
2015-05-13 21:00:00	0.101018	21.2
2015-05-13 21:30:00	0.100554	20.8
2015-05-13 22:00:00	0.100554	20.5
2015-05-13 22:30:00	0.100091	20.2
2015-05-13 23:00:00	0.0996264	19.9
2015-05-13 23:30:00	0.0996264	19.6
2015-05-14	0.0991619	19.4
2015-05-14 00:30:00	0.098697	19.1
2015-05-14 01:00:00	0.098697	18.9
2015-05-14 01:30:00	0.098697	18.6
2015-05-14 02:00:00	0.098697	18.4
2015-05-14 02:30:00	0.0982317	18.2
2015-05-14 03:00:00	0.0977661	18
2015-05-14 03:30:00	0.0977661	17.8
2015-05-14 04:00:00	0.0977661	17.6
2015-05-14 04:30:00	0.0973	17.4
2015-05-14 05:00:00	0.0973	17.2
2015-05-14 05:30:00	0.0973	17
2015-05-14 06:00:00	0.0973	16.9
2015-05-14 06:30:00	0.0968336	16.7
2015-05-14 07:00:00	0.0968336	16.6
2015-05-14 07:30:00	0.0963668	16.5
2015-05-14 08:00:00	0.0963668	16.5
2015-05-14 08:30:00	0.0963668	16.6
2015-05-14 09:00:00	0.0968336	16.7
2015-05-14 09:30:00	0.0963668	17
2015-05-14 10:00:00	0.0968336	17.4
2015-05-14 10:30:00	0.0968336	17.8
2015-05-14 11:00:00	0.0973	18.1
2015-05-14 11:30:00	0.0973	18.4
2015-05-14 12:00:00	0.0973	18.8
2015-05-14 12:30:00	0.0977661	19.2
2015-05-14 13:00:00	0.0982317	19.8
2015-05-14 13:30:00	0.098697	20.5
2015-05-14 14:00:00	0.098697	21.2
2015-05-14 14:30:00	0.0991619	21.8
2015-05-14 15:00:00	0.0991619	22.1
2015-05-14 15:30:00	0.0996264	22.4
2015-05-14 16:00:00	0.0996264	22.8
2015-05-14 16:30:00	0.0996264	23
2015-05-14 17:00:00	0.0996264	23.1
2015-05-14 17:30:00	0.0996264	23.1
2015-05-14 18:00:00	0.0991619	23.1
2015-05-14 18:30:00	0.0991619	23
2015-05-14 19:00:00	0.0991619	22.8
2015-05-14 19:30:00	0.098697	22.7
2015-05-14 20:00:00	0.098697	22.4
2015-05-14 20:30:00	0.098697	22
2015-05-14 21:00:00	0.0982317	21.6
2015-05-14 21:30:00	0.0977661	21.2
2015-05-14 22:00:00	0.0973	20.9
2015-05-14 22:30:00	0.0973	20.5
2015-05-14 23:00:00	0.0968336	20.1
2015-05-14 23:30:00	0.0963668	19.8
2015-05-15	0.0963668	19.4
2015-05-15 00:30:00	0.0958997	19.1
2015-05-15 01:00:00	0.0958997	18.7
2015-05-15 01:30:00	0.0954321	18.4
2015-05-15 02:00:00	0.0954321	18.1
2015-05-15 02:30:00	0.0949642	17.8
2015-05-15 03:00:00	0.0949642	17.5
2015-05-15 03:30:00	0.0944958	17.2
2015-05-15 04:00:00	0.0944958	16.9
2015-05-15 04:30:00	0.0940271	16.7
2015-05-15 05:00:00	0.0940271	16.4
2015-05-15 05:30:00	0.0935581	16.1
2015-05-15 06:00:00	0.0935581	15.8
2015-05-15 06:30:00	0.0930886	15.6
2015-05-15 07:00:00	0.0930886	15.3
2015-05-15 07:30:00	0.0926188	15.1
2015-05-15 08:00:00	0.0926188	15
2015-05-15 08:30:00	0.0926188	15.1
2015-05-15 09:00:00	0.0926188	15.2
2015-05-15 09:30:00	0.0926188	15.5
2015-05-15 10:00:00	0.0930886	16
2015-05-15 10:30:00	0.0935581	16.6
2015-05-15 11:00:00	0.0940271	17.2
2015-05-15 11:30:00	0.0944958	18
2015-05-15 12:00:00	0.0949642	18.8
2015-05-15 12:30:00	0.0954321	19.6
2015-05-15 13:00:00	0.0958997	20.3
2015-05-15 13:30:00	0.0963668	21.1
2015-05-15 14:00:00	0.0968336	21.8
2015-05-15 14:30:00	0.0973	22.5
2015-05-15 15:00:00	0.0977661	23.2
2015-05-15 15:30:00	0.0982317	23.7
2015-05-15 16:00:00	0.0982317	24.1
2015-05-15 16:30:00	0.098697	24.5
2015-05-15 17:00:00	0.098697	24.7
2015-05-15 17:30:00	0.098697	24.8
2015-05-15 18:00:00	0.098697	24.8
2015-05-15 18:30:00	0.0982317	24.7
2015-05-15 19:00:00	0.0982317	24.5
2015-05-15 19:30:00	0.0977661	24.2
2015-05-15 20:00:00	0.0973	23.8
2015-05-15 20:30:00	0.0973	23.3
2015-05-15 21:00:00	0.0968336	22.8
2015-05-15 21:30:00	0.0963668	22.2
2015-05-15 22:00:00	0.0954321	21.7
2015-05-15 22:30:00	0.0954321	21.2
2015-05-15 23:00:00	0.0949642	20.7
2015-05-15 23:30:00	0.0949642	20.2
2015-05-16	0.0940271	19.8
2015-05-16 00:30:00	0.0940271	19.3
2015-05-16 01:00:00	0.0935581	18.9
2015-05-16 01:30:00	0.0935581	18.5
2015-05-16 02:00:00	0.0930886	18.1
2015-05-16 02:30:00	0.0926188	17.8
2015-05-16 03:00:00	0.0926188	17.4
2015-05-16 03:30:00	0.0926188	17.1
2015-05-16 04:00:00	0.0921485	16.8
2015-05-16 04:30:00	0.0916779	16.5
2015-05-16 05:00:00	0.0916779	16.2
2015-05-16 05:30:00	0.0912069	15.9
2015-05-16 06:00:00	0.0912069	15.6
2015-05-16 06:30:00	0.0912069	15.4
2015-05-16 07:00:00	0.0907355	15.2
2015-05-16 07:30:00	0.0907355	15.1
2015-05-16 08:00:00	0.0907355	15
2015-05-16 08:30:00	0.0907355	15.1
2015-05-16 09:00:00	0.0907355	15.3
2015-05-16 09:30:00	0.0907355	15.7
2015-05-16 10:00:00	0.0912069	16.2
2015-05-16 10:30:00	0.0912069	16.8
2015-05-16 11:00:00	0.0916779	17.5
2015-05-16 11:30:00	0.0926188	18.3
2015-05-16 12:00:00	0.0926188	19.2
2015-05-16 12:30:00	0.0935581	20
2015-05-16 13:00:00	0.0940271	20.8
2015-05-16 13:30:00	0.0944958	21.6
2015-05-16 14:00:00	0.0944958	22.3
2015-05-16 14:30:00	0.0949642	23
2015-05-16 15:00:00	0.0954321	23.6
2015-05-16 15:30:00	0.0958997	24.1
2015-05-16 16:00:00	0.0958997	24.4
2015-05-16 16:30:00	0.0958997	24.6
2015-05-16 17:00:00	0.0958997	24.7
2015-05-16 17:30:00	0.0958997	24.7
2015-05-16 18:00:00	0.0954321	24.6
2015-05-16 18:30:00	0.0954321	24.4
2015-05-16 19:00:00	0.0954321	24.2
2015-05-16 19:30:00	0.0949642	23.9
2015-05-16 20:00:00	0.0949642	23.6
2015-05-16 20:30:00	0.0944958	23.2
2015-05-16 21:00:00	0.0940271	22.9
2015-05-16 21:30:00	0.0940271	22.5
2015-05-16 22:00:00	0.0940271	22.1
2015-05-16 22:30:00	0.0935581	21.8
2015-05-16 23:00:00	0.0930886	21.4
2015-05-16 23:30:00	0.0926188	21.1
2015-05-17	0.0926188	20.7
2015-05-17 00:30:00	0.0926188	20.4
2015-05-17 01:00:00	0.0921485	20.2
2015-05-17 01:30:00	0.0916779	19.9
2015-05-17 02:00:00	0.0916779	19.6
2015-05-17 02:30:00	0.0912069	19.4
2015-05-17 03:00:00	0.0912069	19.1
2015-05-17 03:30:00	0.0912069	18.9
2015-05-17 04:00:00	0.0907355	18.7
2015-05-17 04:30:00	0.0907355	18.5
2015-05-17 05:00:00	0.0907355	18.2
2015-05-17 05:30:00	0.0902638	18
2015-05-17 06:00:00	0.0902638	17.8
2015-05-17 06:30:00	0.0902638	17.6
2015-05-17 07:00:00	0.0897916	17.4
2015-05-17 07:30:00	0.0897916	17.3
2015-05-17 08:00:00	0.0897916	17.3
2015-05-17 08:30:00	0.0897916	17.3
2015-05-17 09:00:00	0.0897916	17.5
2015-05-17 09:30:00	0.0897916	17.8
2015-05-17 10:00:00	0.0897916	18.2
2015-05-17 10:30:00	0.0897916	18.7
2015-05-17 11:00:00	0.0902638	19.2
2015-05-17 11:30:00	0.0907355	19.9
2015-05-17 12:00:00	0.0912069	20.6
2015-05-17 12:30:00	0.0916779	21.3
2015-05-17 13:00:00	0.0921485	22.1
2015-05-17 13:30:00	0.0926188	22.9
2015-05-17 14:00:00	0.0926188	23.5
2015-05-17 14:30:00	0.0930886	24.1
2015-05-17 15:00:00	0.0930886	24.6
2015-05-17 15:30:00	0.0935581	24.9
2015-05-17 16:00:00	0.0935581	25.2
2015-05-17 16:30:00	0.0935581	25.4
2015-05-17 17:00:00	0.0935581	25.4
2015-05-17 17:30:00	0.0935581	25.4
2015-05-17 18:00:00	0.0935581	25.3
2015-05-17 18:30:00	0.0930886	25.1
2015-05-17 19:00:00	0.0930886	24.9
2015-05-17 19:30:00	0.0926188	24.6
2015-05-17 20:00:00	0.0926188	24.2
2015-05-17 20:30:00	0.0921485	23.8
2015-05-17 21:00:00	0.0921485	23.4
2015-05-17 21:30:00	0.0916779	23.1
2015-05-17 22:00:00	0.0912069	22.7
2015-05-17 22:30:00	0.0912069	22.4
2015-05-17 23:00:00	0.0912069	22.1
2015-05-17 23:30:00	0.0907355	21.8
2015-05-18	0.0902638	21.4
2015-05-18 00:30:00	0.0897916	21.1
2015-05-18 01:00:00	0.0897916	20.7
2015-05-18 01:30:00	0.0893191	20.3
2015-05-18 02:00:00	0.0893191	20
2015-05-18 02:30:00	0.0888462	19.6
2015-05-18 03:00:00	0.0883729	19.3
2015-05-18 03:30:00	0.0883729	19
2015-05-18 04:00:00	0.0883729	18.7
2015-05-18 04:30:00	0.0878992	18.4
2015-05-18 05:00:00	0.0878992	18.1
2015-05-18 05:30:00	0.0874251	17.9
2015-05-18 06:00:00	0.0869507	17.6
2015-05-18 06:30:00	0.0869507	17.3
2015-05-18 07:00:00	0.0869507	17
2015-05-18 07:30:00	0.0864758	16.8
2015-05-18 08:00:00	0.0864758	16.8
2015-05-18 08:30:00	0.0864758	16.9
2015-05-18 09:00:00	0.0864758	17.1
2015-05-18 09:30:00	0.0864758	17.4
2015-05-18 10:00:00	0.0869507	17.9
2015-05-18 10:30:00	0.0869507	18.5
2015-05-18 11:00:00	0.0874251	19.2
2015-05-18 11:30:00	0.0878992	19.9
2015-05-18 12:00:00	0.0883729	20.7
2015-05-18 12:30:00	0.0888462	21.5
2015-05-18 13:00:00	0.0893191	22.2
2015-05-18 13:30:00	0.0897916	22.9
2015-05-18 14:00:00	0.0897916	23.6
2015-05-18 14:30:00	0.0902638	24.3
2015-05-18 15:00:00	0.0907355	24.8
2015-05-18 15:30:00	0.0912069	25.3
2015-05-18 16:00:00	0.0912069	25.8
2015-05-18 16:30:00	0.0912069	26.2
2015-05-18 17:00:00	0.0916779	26.4
2015-05-18 17:30:00	0.0916779	26.5
2015-05-18 18:00:00	0.0916779	26.6
2015-05-18 18:30:00	0.0916779	26.6
2015-05-18 19:00:00	0.0912069	26.4
2015-05-18 19:30:00	0.0912069	26.2
2015-05-18 20:00:00	0.0912069	25.8
2015-05-18 20:30:00	0.0907355	25.4
2015-05-18 21:00:00	0.0902638	25
2015-05-18 21:30:00	0.0897916	24.5
2015-05-18 22:00:00	0.0897916	24
2015-05-18 22:30:00	0.0893191	23.6
2015-05-18 23:00:00	0.0888462	23.2
2015-05-18 23:30:00	0.0883729	22.8
2015-05-19	0.0883729	22.4
2015-05-19 00:30:00	0.0878992	22
2015-05-19 01:00:00	0.0878992	21.6
2015-05-19 01:30:00	0.0874251	21.3
2015-05-19 02:00:00	0.0874251	21
2015-05-19 02:30:00	0.0869507	20.7
2015-05-19 03:00:00	0.0869507	20.4
2015-05-19 03:30:00	0.0864758	20.1
2015-05-19 04:00:00	0.0864758	19.9
2015-05-19 04:30:00	0.0864758	19.6
2015-05-19 05:00:00	0.0860006	19.4
2015-05-19 05:30:00	0.085525	19.2
2015-05-19 06:00:00	0.085525	19
2015-05-19 06:30:00	0.085525	18.8
2015-05-19 07:00:00	0.085049	18.6
2015-05-19 07:30:00	0.085049	18.4
2015-05-19 08:00:00	0.085049	18.3
2015-05-19 08:30:00	0.085049	18.3
2015-05-19 09:00:00	0.0845726	18.4
2015-05-19 09:30:00	0.0845726	18.5
2015-05-19 10:00:00	0.0845726	18.7
2015-05-19 10:30:00	0.0845726	19
2015-05-19 11:00:00	0.085049	19.4
2015-05-19 11:30:00	0.085049	19.8
2015-05-19 12:00:00	0.085049	20.3
2015-05-19 12:30:00	0.085525	20.9
2015-05-19 13:00:00	0.0860006	21.4
2015-05-19 13:30:00	0.0860006	21.9
2015-05-19 14:00:00	0.0864758	22.4
2015-05-19 14:30:00	0.0864758	22.8
2015-05-19 15:00:00	0.0869507	23.2
2015-05-19 15:30:00	0.0869507	23.5
2015-05-19 16:00:00	0.0869507	23.7
2015-05-19 16:30:00	0.0869507	23.8
2015-05-19 17:00:00	0.0869507	23.8
2015-05-19 17:30:00	0.0869507	23.6
2015-05-19 18:00:00	0.0864758	23.5
2015-05-19 18:30:00	0.0864758	23.3
2015-05-19 19:00:00	0.0864758	23.1
2015-05-19 19:30:00	0.0864758	22.9
2015-05-19 20:00:00	0.0860006	22.6
2015-05-19 20:30:00	0.0860006	22.3
2015-05-19 21:00:00	0.085525	22
2015-05-19 21:30:00	0.085525	21.8
2015-05-19 22:00:00	0.085049	21.5
2015-05-19 22:30:00	0.085049	21.2
2015-05-19 23:00:00	0.0845726	20.9
2015-05-19 23:30:00	0.0845726	20.6
2015-05-20	0.0845726	20.3
2015-05-20 00:30:00	0.0840958	20
2015-05-20 01:00:00	0.0836187	19.7
2015-05-20 01:30:00	0.0836187	19.4
2015-05-20 02:00:00	0.0836187	19.1
2015-05-20 02:30:00	0.0831411	18.8
2015-05-20 03:00:00	0.0826632	18.5
2015-05-20 03:30:00	0.0826632	18.2
2015-05-20 04:00:00	0.0826632	18
2015-05-20 04:30:00	0.0821849	17.7
2015-05-20 05:00:00	0.0821849	17.4
2015-05-20 05:30:00	0.0821849	17.2
2015-05-20 06:00:00	0.0817062	17
2015-05-20 06:30:00	0.0817062	16.8
2015-05-20 07:00:00	0.0812271	16.6
2015-05-20 07:30:00	0.0812271	16.4
2015-05-20 08:00:00	0.0807476	16.3
2015-05-20 08:30:00	0.0807476	16.3
2015-05-20 09:00:00	0.0807476	16.3
2015-05-20 09:30:00	0.0807476	16.4
2015-05-20 10:00:00	0.0807476	16.6
2015-05-20 10:30:00	0.0807476	16.7
2015-05-20 11:00:00	0.0807476	16.9
2015-05-20 11:30:00	0.0807476	17.1
2015-05-20 12:00:00	0.0807476	17.2
2015-05-20 12:30:00	0.0807476	17.4
2015-05-20 13:00:00	0.0807476	17.5
2015-05-20 13:30:00	0.0807476	17.6
2015-05-20 14:00:00	0.0807476	17.6
2015-05-20 14:30:00	0.0807476	17.5
2015-05-20 15:00:00	0.0807476	17.4
2015-05-20 15:30:00	0.0807476	17.3
2015-05-20 16:00:00	0.0807476	17.2
2015-05-20 16:30:00	0.0802678	16.9
2015-05-20 17:00:00	0.0802678	16.6
2015-05-20 17:30:00	0.0802678	16.3
2015-05-20 18:00:00	0.0802678	16
2015-05-20 18:30:00	0.0802678	15.8
2015-05-20 19:00:00	0.0807476	15.6
2015-05-20 19:30:00	0.0812271	15.4
2015-05-20 20:00:00	0.0836187	15.2
2015-05-20 20:30:00	0.0907355	14.9
2015-05-20 21:00:00	0.102405	14.7
2015-05-20 21:30:00	0.116097	14.5
2015-05-20 22:00:00	0.128134	14.2
2015-05-20 22:30:00	0.132086	13.9
2015-05-20 23:00:00	0.134269	13.7
2015-05-20 23:30:00	0.138608	13.4
2015-05-21	0.142053	13.2
2015-05-21 00:30:00	0.143766	12.9
2015-05-21 01:00:00	0.144621	12.7
2015-05-21 01:30:00	0.144194	12.5
2015-05-21 02:00:00	0.143766	12.3
2015-05-21 02:30:00	0.14291	12.2
2015-05-21 03:00:00	0.142482	12
2015-05-21 03:30:00	0.142053	11.9
2015-05-21 04:00:00	0.141623	11.8
2015-05-21 04:30:00	0.141194	11.7
2015-05-21 05:00:00	0.141194	11.6
2015-05-21 05:30:00	0.140764	11.5
2015-05-21 06:00:00	0.140333	11.5
2015-05-21 06:30:00	0.139471	11.4
2015-05-21 07:00:00	0.13904	11.3
2015-05-21 07:30:00	0.138608	11.3
2015-05-21 08:00:00	0.138175	11.2
2015-05-21 08:30:00	0.138175	11.2
2015-05-21 09:00:00	0.137743	11.2
2015-05-21 09:30:00	0.13731	11.2
2015-05-21 10:00:00	0.136877	11.2
2015-05-21 10:30:00	0.136877	11.3
2015-05-21 11:00:00	0.136443	11.5
2015-05-21 11:30:00	0.136443	11.8
2015-05-21 12:00:00	0.136443	12.1
2015-05-21 12:30:00	0.136443	12.4
2015-05-21 13:00:00	0.136443	13
2015-05-21 13:30:00	0.136443	13.4
2015-05-21 14:00:00	0.136443	13.7
2015-05-21 14:30:00	0.136443	14
2015-05-21 15:00:00	0.136443	14.4
2015-05-21 15:30:00	0.136443	14.6
2015-05-21 16:00:00	0.136009	14.6
2015-05-21 16:30:00	0.135574	14.6
2015-05-21 17:00:00	0.13514	14.4
2015-05-21 17:30:00	0.134704	14.3
2015-05-21 18:00:00	0.134704	14.4
2015-05-21 18:30:00	0.134704	14.5
2015-05-21 19:00:00	0.134704	14.6
2015-05-21 19:30:00	0.134269	14.5
2015-05-21 20:00:00	0.133833	14.4
2015-05-21 20:30:00	0.133397	14.2
2015-05-21 21:00:00	0.13296	13.9
2015-05-21 21:30:00	0.132523	13.6
2015-05-21 22:00:00	0.132523	13.3
2015-05-21 22:30:00	0.131648	13
2015-05-21 23:00:00	0.131648	12.8
2015-05-21 23:30:00	0.13121	12.5
2015-05-22	0.13121	12.3
2015-05-22 00:30:00	0.130772	12
2015-05-22 01:00:00	0.130333	11.8
2015-05-22 01:30:00	0.130333	11.6
2015-05-22 02:00:00	0.130333	11.5
2015-05-22 02:30:00	0.129894	11.3
2015-05-22 03:00:00	0.129894	11.1
2015-05-22 03:30:00	0.129454	10.9
2015-05-22 04:00:00	0.129454	10.8
2015-05-22 04:30:00	0.129014	10.6
2015-05-22 05:00:00	0.129014	10.5
2015-05-22 05:30:00	0.128574	10.3
2015-05-22 06:00:00	0.128574	10.1
2015-05-22 06:30:00	0.128574	10
2015-05-22 07:00:00	0.128134	9.9
2015-05-22 07:30:00	0.128134	9.8
2015-05-22 08:00:00	0.128134	10
2015-05-22 08:30:00	0.128574	10.3
2015-05-22 09:00:00	0.128574	10.8
2015-05-22 09:30:00	0.129014	11.4
2015-05-22 10:00:00	0.129454	12.1
2015-05-22 10:30:00	0.129894	12.9
2015-05-22 11:00:00	0.130333	13.7
2015-05-22 11:30:00	0.130772	14.5
2015-05-22 12:00:00	0.13121	15.2
2015-05-22 12:30:00	0.131648	15.9
2015-05-22 13:00:00	0.132086	16.7
2015-05-22 13:30:00	0.132523	17.5
2015-05-22 14:00:00	0.13296	18.3
2015-05-22 14:30:00	0.133397	19.1
2015-05-22 15:00:00	0.133397	19.7
2015-05-22 15:30:00	0.133833	20.2
2015-05-22 16:00:00	0.133833	20.7
2015-05-22 16:30:00	0.134269	21.2
2015-05-22 17:00:00	0.134269	21.6
2015-05-22 17:30:00	0.134269	21.8
2015-05-22 18:00:00	0.134269	21.9
2015-05-22 18:30:00	0.133833	21.9
2015-05-22 19:00:00	0.133397	21.7
2015-05-22 19:30:00	0.13296	21.5
2015-05-22 20:00:00	0.13296	21
2015-05-22 20:30:00	0.132086	20.6
2015-05-22 21:00:00	0.131648	20.1
2015-05-22 21:30:00	0.13121	19.5
2015-05-22 22:00:00	0.130333	19
2015-05-22 22:30:00	0.129894	18.5
2015-05-22 23:00:00	0.129894	18.1
2015-05-22 23:30:00	0.129454	17.6
2015-05-23	0.129014	17.2
2015-05-23 00:30:00	0.128574	16.8
2015-05-23 01:00:00	0.128574	16.5
2015-05-23 01:30:00	0.128134	16.1
2015-05-23 02:00:00	0.127693	15.8
2015-05-23 02:30:00	0.127251	15.5
2015-05-23 03:00:00	0.127251	15.2
2015-05-23 03:30:00	0.126809	15
2015-05-23 04:00:00	0.126809	14.7
2015-05-23 04:30:00	0.126367	14.5
2015-05-23 05:00:00	0.126367	14.3
2015-05-23 05:30:00	0.125925	14
2015-05-23 06:00:00	0.125925	13.8
2015-05-23 06:30:00	0.125482	13.6
2015-05-23 07:00:00	0.125482	13.5
2015-05-23 07:30:00	0.125039	13.4
2015-05-23 08:00:00	0.125482	13.5
2015-05-23 08:30:00	0.125482	13.8
2015-05-23 09:00:00	0.125482	14.1
2015-05-23 09:30:00	0.125925	14.6
2015-05-23 10:00:00	0.126367	15.3
2015-05-23 10:30:00	0.126809	16.1
2015-05-23 11:00:00	0.127693	17
2015-05-23 11:30:00	0.128134	18
2015-05-23 12:00:00	0.128574	19
2015-05-23 12:30:00	0.129014	19.8
2015-05-23 13:00:00	0.129454	20.4
2015-05-23 13:30:00	0.129894	21.2
2015-05-23 14:00:00	0.130333	22
2015-05-23 14:30:00	0.130772	22.8
2015-05-23 15:00:00	0.13121	23.6
2015-05-23 15:30:00	0.131648	24.3
2015-05-23 16:00:00	0.131648	24.9
2015-05-23 16:30:00	0.131648	25.1
2015-05-23 17:00:00	0.131648	25.3
2015-05-23 17:30:00	0.131648	25.4
2015-05-23 18:00:00	0.131648	25.4
2015-05-23 18:30:00	0.13121	25.3
2015-05-23 19:00:00	0.130772	25
2015-05-23 19:30:00	0.130333	24.6
2015-05-23 20:00:00	0.129894	24.1
2015-05-23 20:30:00	0.129454	23.6
2015-05-23 21:00:00	0.129014	23
2015-05-23 21:30:00	0.128134	22.5
2015-05-23 22:00:00	0.128134	21.9
2015-05-23 22:30:00	0.127251	21.4
2015-05-23 23:00:00	0.126809	21
2015-05-23 23:30:00	0.126809	20.6
2015-05-24	0.126367	20.2
2015-05-24 00:30:00	0.125925	19.9
2015-05-24 01:00:00	0.125925	19.5
2015-05-24 01:30:00	0.125482	19.2
2015-05-24 02:00:00	0.125482	18.9
2015-05-24 02:30:00	0.125039	18.6
2015-05-24 03:00:00	0.125039	18.4
2015-05-24 03:30:00	0.124595	18.1
2015-05-24 04:00:00	0.124151	17.8
2015-05-24 04:30:00	0.124151	17.6
2015-05-24 05:00:00	0.123707	17.3
2015-05-24 05:30:00	0.123707	17.1
2015-05-24 06:00:00	0.123707	16.9
2015-05-24 06:30:00	0.123262	16.7
2015-05-24 07:00:00	0.123262	16.5
2015-05-24 07:30:00	0.123262	16.4
2015-05-24 08:00:00	0.122817	16.5
2015-05-24 08:30:00	0.123262	16.7
2015-05-24 09:00:00	0.123262	16.9
2015-05-24 09:30:00	0.123262	17.4
2015-05-24 10:00:00	0.123707	17.9
2015-05-24 10:30:00	0.124151	18.6
2015-05-24 11:00:00	0.124595	19.3
2015-05-24 11:30:00	0.125039	20.2
2015-05-24 12:00:00	0.125482	21
2015-05-24 12:30:00	0.126367	21.9
2015-05-24 13:00:00	0.126367	22.8
2015-05-24 13:30:00	0.126809	23.6
2015-05-24 14:00:00	0.127251	24.3
2015-05-24 14:30:00	0.127693	25
2015-05-24 15:00:00	0.128134	25.6
2015-05-24 15:30:00	0.128134	26.1
2015-05-24 16:00:00	0.128134	26.5
2015-05-24 16:30:00	0.128574	26.8
2015-05-24 17:00:00	0.128574	27
2015-05-24 17:30:00	0.128134	27.1
2015-05-24 18:00:00	0.128134	27.1
2015-05-24 18:30:00	0.128134	26.9
2015-05-24 19:00:00	0.127693	26.6
2015-05-24 19:30:00	0.126809	26.2
2015-05-24 20:00:00	0.126809	25.7
2015-05-24 20:30:00	0.126367	25.2
2015-05-24 21:00:00	0.125925	24.7
2015-05-24 21:30:00	0.125039	24.2
2015-05-24 22:00:00	0.125039	23.7
2015-05-24 22:30:00	0.124151	23.2
2015-05-24 23:00:00	0.123707	22.8
2015-05-24 23:30:00	0.123707	22.4
2015-05-25	0.123262	22
2015-05-25 00:30:00	0.123262	21.7
2015-05-25 01:00:00	0.122817	21.3
2015-05-25 01:30:00	0.122372	21
2015-05-25 02:00:00	0.122372	20.7
2015-05-25 02:30:00	0.121926	20.4
2015-05-25 03:00:00	0.121926	20.1
2015-05-25 03:30:00	0.12148	19.9
2015-05-25 04:00:00	0.12148	19.6
2015-05-25 04:30:00	0.121034	19.3
2015-05-25 05:00:00	0.121034	19.1
2015-05-25 05:30:00	0.120587	18.8
2015-05-25 06:00:00	0.120587	18.6
2015-05-25 06:30:00	0.120587	18.4
2015-05-25 07:00:00	0.120139	18.2
2015-05-25 07:30:00	0.120139	18.1
2015-05-25 08:00:00	0.120139	18.1
2015-05-25 08:30:00	0.120139	18.2
2015-05-25 09:00:00	0.120139	18.3
2015-05-25 09:30:00	0.120139	18.5
2015-05-25 10:00:00	0.120139	18.9
2015-05-25 10:30:00	0.120587	19.4
2015-05-25 11:00:00	0.121034	20
2015-05-25 11:30:00	0.12148	20.5
2015-05-25 12:00:00	0.12148	20.9
2015-05-25 12:30:00	0.121926	21.3
2015-05-25 13:00:00	0.121926	21.7
2015-05-25 13:30:00	0.121926	22
2015-05-25 14:00:00	0.122372	22.4
2015-05-25 14:30:00	0.122372	22.8
2015-05-25 15:00:00	0.122372	23.1
2015-05-25 15:30:00	0.122372	23.2
2015-05-25 16:00:00	0.122372	23.4
2015-05-25 16:30:00	0.122372	23.7
2015-05-25 17:00:00	0.122372	23.8
2015-05-25 17:30:00	0.122372	23.8
2015-05-25 18:00:00	0.121926	23.8
2015-05-25 18:30:00	0.121926	23.7
2015-05-25 19:00:00	0.121926	23.5
2015-05-25 19:30:00	0.12148	23.3
2015-05-25 20:00:00	0.12148	23
2015-05-25 20:30:00	0.121034	22.8
2015-05-25 21:00:00	0.120587	22.4
2015-05-25 21:30:00	0.120139	22
2015-05-25 22:00:00	0.120139	21.6
2015-05-25 22:30:00	0.119692	21.2
2015-05-25 23:00:00	0.119244	20.9
2015-05-25 23:30:00	0.118795	20.5
2015-05-26	0.118795	20.2
2015-05-26 00:30:00	0.118795	19.9
2015-05-26 01:00:00	0.118347	19.6
2015-05-26 01:30:00	0.117898	19.3
2015-05-26 02:00:00	0.117448	19
2015-05-26 02:30:00	0.117448	18.7
2015-05-26 03:00:00	0.117448	18.4
2015-05-26 03:30:00	0.116998	18.1
2015-05-26 04:00:00	0.116998	17.9
2015-05-26 04:30:00	0.116548	17.7
2015-05-26 05:00:00	0.116548	17.5
2015-05-26 05:30:00	0.116548	17.2
2015-05-26 06:00:00	0.116097	17
2015-05-26 06:30:00	0.115646	16.8
2015-05-26 07:00:00	0.115646	16.7
2015-05-26 07:30:00	0.115646	16.6
2015-05-26 08:00:00	0.115646	16.6
2015-05-26 08:30:00	0.115646	16.8
2015-05-26 09:00:00	0.115646	17.1
2015-05-26 09:30:00	0.116097	17.5
2015-05-26 10:00:00	0.116548	18
2015-05-26 10:30:00	0.116998	18.7
2015-05-26 11:00:00	0.117448	19.4
2015-05-26 11:30:00	0.117898	20.2
2015-05-26 12:00:00	0.118347	21
2015-05-26 12:30:00	0.118795	21.8
2015-05-26 13:00:00	0.119244	22.6
2015-05-26 13:30:00	0.119692	23.4
2015-05-26 14:00:00	0.120139	24.1
2015-05-26 14:30:00	0.120587	24.8
2015-05-26 15:00:00	0.120587	25.4
2015-05-26 15:30:00	0.121034	25.8
2015-05-26 16:00:00	0.121034	26.1
2015-05-26 16:30:00	0.121034	26.2
2015-05-26 17:00:00	0.120587	26.2
2015-05-26 17:30:00	0.120587	26.1
2015-05-26 18:00:00	0.120587	26
2015-05-26 18:30:00	0.120139	25.8
2015-05-26 19:00:00	0.120139	25.5
2015-05-26 19:30:00	0.119692	25.2
2015-05-26 20:00:00	0.119244	24.9
2015-05-26 20:30:00	0.118795	24.5
2015-05-26 21:00:00	0.118795	24.1
2015-05-26 21:30:00	0.118347	23.6
2015-05-26 22:00:00	0.117898	23.2
2015-05-26 22:30:00	0.117448	22.8
2015-05-26 23:00:00	0.116998	22.4
2015-05-26 23:30:00	0.116998	22.1
2015-05-27	0.116548	21.7
2015-05-27 00:30:00	0.116548	21.4
2015-05-27 01:00:00	0.116097	21.1
2015-05-27 01:30:00	0.115646	20.8
2015-05-27 02:00:00	0.115646	20.5
2015-05-27 02:30:00	0.115195	20.3
2015-05-27 03:00:00	0.115195	20
2015-05-27 03:30:00	0.115195	19.8
2015-05-27 04:00:00	0.114743	19.6
2015-05-27 04:30:00	0.114291	19.3
2015-05-27 05:00:00	0.114291	19.1
2015-05-27 05:30:00	0.114291	18.9
2015-05-27 06:00:00	0.114291	18.7
2015-05-27 06:30:00	0.113839	18.5
2015-05-27 07:00:00	0.113839	18.3
2015-05-27 07:30:00	0.113839	18.2
2015-05-27 08:00:00	0.113839	18.2
2015-05-27 08:30:00	0.113386	18.4
2015-05-27 09:00:00	0.113839	18.7
2015-05-27 09:30:00	0.113839	19.1
2015-05-27 10:00:00	0.114291	19.6
2015-05-27 10:30:00	0.114743	20.3
2015-05-27 11:00:00	0.115195	21
2015-05-27 11:30:00	0.115646	21.8
2015-05-27 12:00:00	0.116548	22.7
2015-05-27 12:30:00	0.116998	23.6
2015-05-27 13:00:00	0.117448	24.4
2015-05-27 13:30:00	0.117898	25.2
2015-05-27 14:00:00	0.118347	25.7
2015-05-27 14:30:00	0.117898	25.9
2015-05-27 15:00:00	0.117898	26
2015-05-27 15:30:00	0.117898	26.2
2015-05-27 16:00:00	0.118347	26.5
2015-05-27 16:30:00	0.118347	26.8
2015-05-27 17:00:00	0.118347	26.8
2015-05-27 17:30:00	0.117898	26.9
2015-05-27 18:00:00	0.117898	26.8
2015-05-27 18:30:00	0.117898	26.6
2015-05-27 19:00:00	0.117448	26.4
2015-05-27 19:30:00	0.116998	26.1
2015-05-27 20:00:00	0.116998	25.7
2015-05-27 20:30:00	0.116548	25.4
2015-05-27 21:00:00	0.116097	25
2015-05-27 21:30:00	0.115646	24.7
2015-05-27 22:00:00	0.115646	24.4
2015-05-27 22:30:00	0.115195	24.1
2015-05-27 23:00:00	0.114743	23.8
2015-05-27 23:30:00	0.114743	23.5
2015-05-28	0.114291	23.3
2015-05-28 00:30:00	0.114291	23
2015-05-28 01:00:00	0.114291	22.7
2015-05-28 01:30:00	0.113839	22.4
2015-05-28 02:00:00	0.113839	22.2
2015-05-28 02:30:00	0.113386	21.9
2015-05-28 03:00:00	0.113386	21.7
2015-05-28 03:30:00	0.112933	21.5
2015-05-28 04:00:00	0.112933	21.3
2015-05-28 04:30:00	0.112933	21.1
2015-05-28 05:00:00	0.112479	20.9
2015-05-28 05:30:00	0.112479	20.7
2015-05-28 06:00:00	0.112479	20.5
2015-05-28 06:30:00	0.112025	20.3
2015-05-28 07:00:00	0.111571	20.2
2015-05-28 07:30:00	0.111571	20
2015-05-28 08:00:00	0.111571	19.8
2015-05-28 08:30:00	0.111116	19.7
2015-05-28 09:00:00	0.111116	19.5
2015-05-28 09:30:00	0.111116	19.4
2015-05-28 10:00:00	0.111116	19.3
2015-05-28 10:30:00	0.111116	19.2
2015-05-28 11:00:00	0.110661	19.1
2015-05-28 11:30:00	0.110661	19.1
2015-05-28 12:00:00	0.110661	19.2
2015-05-28 12:30:00	0.110661	19.4
2015-05-28 13:00:00	0.110661	19.6
2015-05-28 13:30:00	0.111116	19.9
2015-05-28 14:00:00	0.111116	20.1
2015-05-28 14:30:00	0.111116	20.2
2015-05-28 15:00:00	0.111116	20.5
2015-05-28 15:30:00	0.112025	20.8
2015-05-28 16:00:00	0.112025	21
2015-05-28 16:30:00	0.112025	21.2
2015-05-28 17:00:00	0.112025	21.3
2015-05-28 17:30:00	0.112025	21.3
2015-05-28 18:00:00	0.112025	21.2
2015-05-28 18:30:00	0.111571	21.1
2015-05-28 19:00:00	0.111571	20.9
2015-05-28 19:30:00	0.111116	20.7
2015-05-28 20:00:00	0.111116	20.5
2015-05-28 20:30:00	0.111116	20.3
2015-05-28 21:00:00	0.110661	20.1
2015-05-28 21:30:00	0.110661	19.9
2015-05-28 22:00:00	0.110206	19.7
2015-05-28 22:30:00	0.110206	19.5
2015-05-28 23:00:00	0.10975	19.2
2015-05-28 23:30:00	0.10975	19
2015-05-29	0.109294	18.8
2015-05-29 00:30:00	0.109294	18.5
2015-05-29 01:00:00	0.109294	18.3
2015-05-29 01:30:00	0.109294	18
2015-05-29 02:00:00	0.108837	17.9
2015-05-29 02:30:00	0.108837	17.7
2015-05-29 03:00:00	0.108837	17.6
2015-05-29 03:30:00	0.10838	17.4
2015-05-29 04:00:00	0.10838	17.3
2015-05-29 04:30:00	0.10838	17.2
2015-05-29 05:00:00	0.10838	17.1
2015-05-29 05:30:00	0.107923	17
2015-05-29 06:00:00	0.107923	16.8
2015-05-29 06:30:00	0.107923	16.7
2015-05-29 07:00:00	0.107923	16.6
2015-05-29 07:30:00	0.107465	16.5
2015-05-29 08:00:00	0.107923	16.5
2015-05-29 08:30:00	0.107465	16.6
2015-05-29 09:00:00	0.107923	16.8
2015-05-29 09:30:00	0.107923	17.1
2015-05-29 10:00:00	0.107923	17.5
2015-05-29 10:30:00	0.10838	17.8
2015-05-29 11:00:00	0.10838	18.1
2015-05-29 11:30:00	0.10838	18.4
2015-05-29 12:00:00	0.108837	18.6
2015-05-29 12:30:00	0.108837	18.8
2015-05-29 13:00:00	0.109294	19.1
2015-05-29 13:30:00	0.109294	19.6
2015-05-29 14:00:00	0.10975	20.2
2015-05-29 14:30:00	0.110206	21
2015-05-29 15:00:00	0.110661	21.6
2015-05-29 15:30:00	0.111116	22
2015-05-29 16:00:00	0.111116	22.3
2015-05-29 16:30:00	0.111116	22.6
2015-05-29 17:00:00	0.111116	23.1
2015-05-29 17:30:00	0.111116	23.4
2015-05-29 18:00:00	0.111571	23.6
2015-05-29 18:30:00	0.111116	23.7
2015-05-29 19:00:00	0.111116	23.6
2015-05-29 19:30:00	0.111116	23.4
2015-05-29 20:00:00	0.111116	23.1
2015-05-29 20:30:00	0.110661	22.7
2015-05-29 21:00:00	0.110206	22.3
2015-05-29 21:30:00	0.10975	21.8
2015-05-29 22:00:00	0.109294	21.4
2015-05-29 22:30:00	0.109294	21
2015-05-29 23:00:00	0.108837	20.6
2015-05-29 23:30:00	0.10838	20.2
2015-05-30	0.107923	19.8
2015-05-30 00:30:00	0.107923	19.5
2015-05-30 01:00:00	0.107923	19.1
2015-05-30 01:30:00	0.107465	18.8
2015-05-30 02:00:00	0.107007	18.4
2015-05-30 02:30:00	0.107007	18.1
2015-05-30 03:00:00	0.106549	17.9
2015-05-30 03:30:00	0.106549	17.6
2015-05-30 04:00:00	0.106549	17.4
2015-05-30 04:30:00	0.10609	17.2
2015-05-30 05:00:00	0.10609	17
2015-05-30 05:30:00	0.105631	16.8
2015-05-30 06:00:00	0.105631	16.6
2015-05-30 06:30:00	0.105631	16.4
2015-05-30 07:00:00	0.105171	16.2
2015-05-30 07:30:00	0.105171	16.1
2015-05-30 08:00:00	0.105171	16.1
2015-05-30 08:30:00	0.105171	16.4
2015-05-30 09:00:00	0.105631	16.7
2015-05-30 09:30:00	0.105631	17.1
2015-05-30 10:00:00	0.10609	17.7
2015-05-30 10:30:00	0.106549	18.4
2015-05-30 11:00:00	0.106549	19
2015-05-30 11:30:00	0.107465	19.8
2015-05-30 12:00:00	0.107923	20.5
2015-05-30 12:30:00	0.107923	21.1
2015-05-30 13:00:00	0.10838	21.4
2015-05-30 13:30:00	0.10838	21.8
2015-05-30 14:00:00	0.108837	22.5
2015-05-30 14:30:00	0.109294	23.4
2015-05-30 15:00:00	0.10975	24.1
2015-05-30 15:30:00	0.110661	24.8
2015-05-30 16:00:00	0.110661	25.2
2015-05-30 16:30:00	0.110661	25.6
2015-05-30 17:00:00	0.110661	25.8
2015-05-30 17:30:00	0.110661	25.8
2015-05-30 18:00:00	0.110661	25.8
2015-05-30 18:30:00	0.110661	25.8
2015-05-30 19:00:00	0.110206	25.6
2015-05-30 19:30:00	0.110206	25.3
2015-05-30 20:00:00	0.10975	25.1
2015-05-30 20:30:00	0.109294	24.7
2015-05-30 21:00:00	0.109294	24.2
2015-05-30 21:30:00	0.108837	23.8
2015-05-30 22:00:00	0.107923	23.3
2015-05-30 22:30:00	0.107923	22.9
2015-05-30 23:00:00	0.107465	22.4
2015-05-30 23:30:00	0.107465	22
2015-05-31	0.107007	21.6
2015-05-31 00:30:00	0.106549	21.3
2015-05-31 01:00:00	0.106549	21
2015-05-31 01:30:00	0.10609	20.7
2015-05-31 02:00:00	0.10609	20.4
2015-05-31 02:30:00	0.105631	20.2
2015-05-31 03:00:00	0.105631	19.9
2015-05-31 03:30:00	0.105171	19.6
2015-05-31 04:00:00	0.104711	19.4
2015-05-31 04:30:00	0.104711	19.2
2015-05-31 05:00:00	0.104711	18.9
2015-05-31 05:30:00	0.104711	18.7
2015-05-31 06:00:00	0.104711	18.4
2015-05-31 06:30:00	0.104251	18.2
2015-05-31 07:00:00	0.104251	18.1
2015-05-31 07:30:00	0.104251	18
2015-05-31 08:00:00	0.10379	18
2015-05-31 08:30:00	0.10379	18.1
2015-05-31 09:00:00	0.10379	18.4
2015-05-31 09:30:00	0.104251	18.8
2015-05-31 10:00:00	0.104711	19.3
2015-05-31 10:30:00	0.104711	19.8
2015-05-31 11:00:00	0.105171	20.5
2015-05-31 11:30:00	0.105631	21.1
2015-05-31 12:00:00	0.10609	21.7
2015-05-31 12:30:00	0.106549	22.3
2015-05-31 13:00:00	0.106549	22.9
2015-05-31 13:30:00	0.107007	23.4
2015-05-31 14:00:00	0.107007	23.8
2015-05-31 14:30:00	0.107465	24.1
2015-05-31 15:00:00	0.107465	24.3
2015-05-31 15:30:00	0.107465	24.4
2015-05-31 16:00:00	0.107007	24.4
2015-05-31 16:30:00	0.107007	24.4
2015-05-31 17:00:00	0.107007	24.4
2015-05-31 17:30:00	0.107007	24.4
2015-05-31 18:00:00	0.106549	24.3
2015-05-31 18:30:00	0.106549	24.2
2015-05-31 19:00:00	0.106549	24.1
2015-05-31 19:30:00	0.106549	24
2015-05-31 20:00:00	0.10609	23.7
2015-05-31 20:30:00	0.10609	23.5
2015-05-31 21:00:00	0.105631	23.1
2015-05-31 21:30:00	0.105171	22.7
2015-05-31 22:00:00	0.105171	22.4
2015-05-31 22:30:00	0.104711	22
2015-05-31 23:00:00	0.104711	21.7
2015-05-31 23:30:00	0.104251	21.4
2015-06-01	0.10379	21.1
2015-06-01 00:30:00	0.10379	20.8
2015-06-01 01:00:00	0.10379	20.6
2015-06-01 01:30:00	0.103329	20.4
2015-06-01 02:00:00	0.103329	20.1
2015-06-01 02:30:00	0.102867	19.9
2015-06-01 03:00:00	0.102867	19.7
2015-06-01 03:30:00	0.102867	19.5
2015-06-01 04:00:00	0.102867	19.2
2015-06-01 04:30:00	0.102405	19
2015-06-01 05:00:00	0.102405	18.8
2015-06-01 05:30:00	0.101943	18.6
2015-06-01 06:00:00	0.101943	18.4
2015-06-01 06:30:00	0.101943	18.1
2015-06-01 07:00:00	0.101481	18
2015-06-01 07:30:00	0.101481	17.8
2015-06-01 08:00:00	0.101481	17.8
2015-06-01 08:30:00	0.101481	18
2015-06-01 09:00:00	0.101481	18.2
2015-06-01 09:30:00	0.101481	18.5
2015-06-01 10:00:00	0.101943	18.9
2015-06-01 10:30:00	0.101943	19.4
2015-06-01 11:00:00	0.102405	20.1
2015-06-01 11:30:00	0.102867	20.7
2015-06-01 12:00:00	0.103329	21.5
2015-06-01 12:30:00	0.10379	22.2
2015-06-01 13:00:00	0.104251	23
2015-06-01 13:30:00	0.104711	23.8
2015-06-01 14:00:00	0.105171	24.5
2015-06-01 14:30:00	0.105631	25.2
2015-06-01 15:00:00	0.10609	25.8
2015-06-01 15:30:00	0.106549	26.4
2015-06-01 16:00:00	0.106549	26.8
2015-06-01 16:30:00	0.106549	27.2
2015-06-01 17:00:00	0.107007	27.4
2015-06-01 17:30:00	0.107007	27.5
2015-06-01 18:00:00	0.106549	27.4
2015-06-01 18:30:00	0.106549	27.2
2015-06-01 19:00:00	0.10609	26.9
2015-06-01 19:30:00	0.10609	26.6
2015-06-01 20:00:00	0.105631	26.2
2015-06-01 20:30:00	0.105171	25.7
2015-06-01 21:00:00	0.104711	25.2
2015-06-01 21:30:00	0.104251	24.8
2015-06-01 22:00:00	0.10379	24.3
2015-06-01 22:30:00	0.103329	23.8
2015-06-01 23:00:00	0.103329	23.4
2015-06-01 23:30:00	0.102867	23
2015-06-02	0.102867	22.6
2015-06-02 00:30:00	0.102405	22.3
2015-06-02 01:00:00	0.101943	22
2015-06-02 01:30:00	0.101943	21.7
2015-06-02 02:00:00	0.101943	21.4
2015-06-02 02:30:00	0.101481	21.1
2015-06-02 03:00:00	0.101481	20.8
2015-06-02 03:30:00	0.101018	20.6
2015-06-02 04:00:00	0.101018	20.3
2015-06-02 04:30:00	0.100554	20.1
2015-06-02 05:00:00	0.100554	19.9
2015-06-02 05:30:00	0.100091	19.7
2015-06-02 06:00:00	0.100091	19.4
2015-06-02 06:30:00	0.100091	19.2
2015-06-02 07:00:00	0.100091	19.1
2015-06-02 07:30:00	0.0996264	18.9
2015-06-02 08:00:00	0.0996264	18.8
2015-06-02 08:30:00	0.0996264	18.7
2015-06-02 09:00:00	0.0996264	18.7
2015-06-02 09:30:00	0.0991619	18.8
2015-06-02 10:00:00	0.0991619	18.8
2015-06-02 10:30:00	0.0991619	19
2015-06-02 11:00:00	0.0996264	19.4
2015-06-02 11:30:00	0.100091	19.9
2015-06-02 12:00:00	0.100091	20.4
2015-06-02 12:30:00	0.100554	21.1
2015-06-02 13:00:00	0.101481	21.8
2015-06-02 13:30:00	0.101481	22.6
2015-06-02 14:00:00	0.101943	23.2
2015-06-02 14:30:00	0.102405	23.8
2015-06-02 15:00:00	0.102867	24.4
2015-06-02 15:30:00	0.102867	24.9
2015-06-02 16:00:00	0.103329	25.2
2015-06-02 16:30:00	0.103329	25.4
2015-06-02 17:00:00	0.103329	25.4
2015-06-02 17:30:00	0.102867	25.5
2015-06-02 18:00:00	0.102867	25.5
2015-06-02 18:30:00	0.102867	25.5
2015-06-02 19:00:00	0.102867	25.3
2015-06-02 19:30:00	0.102405	25.1
2015-06-02 20:00:00	0.102405	24.8
2015-06-02 20:30:00	0.101943	24.5
2015-06-02 21:00:00	0.101481	24.1
2015-06-02 21:30:00	0.101481	23.8
2015-06-02 22:00:00	0.101018	23.4
2015-06-02 22:30:00	0.101018	23.1
2015-06-02 23:00:00	0.100554	22.8
2015-06-02 23:30:00	0.100091	22.4
2015-06-03	0.100091	22.2
2015-06-03 00:30:00	0.100091	21.9
2015-06-03 01:00:00	0.100091	21.7
2015-06-03 01:30:00	0.0996264	21.5
2015-06-03 02:00:00	0.0996264	21.3
2015-06-03 02:30:00	0.0991619	21.1
2015-06-03 03:00:00	0.0991619	21
2015-06-03 03:30:00	0.0991619	20.8
2015-06-03 04:00:00	0.098697	20.7
2015-06-03 04:30:00	0.098697	20.6
2015-06-03 05:00:00	0.098697	20.4
2015-06-03 05:30:00	0.098697	20.3
2015-06-03 06:00:00	0.098697	20.2
2015-06-03 06:30:00	0.0982317	20.1
2015-06-03 07:00:00	0.0982317	19.9
2015-06-03 07:30:00	0.0982317	19.9
2015-06-03 08:00:00	0.0982317	19.8
2015-06-03 08:30:00	0.0977661	19.8
2015-06-03 09:00:00	0.0982317	19.7
2015-06-03 09:30:00	0.0982317	19.7
2015-06-03 10:00:00	0.0977661	19.7
2015-06-03 10:30:00	0.0977661	19.6
2015-06-03 11:00:00	0.0977661	19.5
2015-06-03 11:30:00	0.0977661	19.5
2015-06-03 12:00:00	0.0973	19.4
2015-06-03 12:30:00	0.0973	19.3
2015-06-03 13:00:00	0.0973	19.3
2015-06-03 13:30:00	0.0973	19.3
2015-06-03 14:00:00	0.0973	19.3
2015-06-03 14:30:00	0.0973	19.2
2015-06-03 15:00:00	0.0973	19.1
2015-06-03 15:30:00	0.0973	19
2015-06-03 16:00:00	0.0968336	18.9
2015-06-03 16:30:00	0.0968336	18.8
2015-06-03 17:00:00	0.0968336	18.8
2015-06-03 17:30:00	0.0968336	18.7
2015-06-03 18:00:00	0.0968336	18.6
2015-06-03 18:30:00	0.0968336	18.5
2015-06-03 19:00:00	0.0968336	18.5
2015-06-03 19:30:00	0.0968336	18.5
2015-06-03 20:00:00	0.0968336	18.5
2015-06-03 20:30:00	0.0968336	18.4
2015-06-03 21:00:00	0.0963668	18.2
2015-06-03 21:30:00	0.0963668	18.1
2015-06-03 22:00:00	0.0963668	18
2015-06-03 22:30:00	0.0958997	17.8
2015-06-03 23:00:00	0.0958997	17.7
2015-06-03 23:30:00	0.0958997	17.6
2015-06-04	0.0958997	17.4
2015-06-04 00:30:00	0.0958997	17.3
2015-06-04 01:00:00	0.0954321	17.2
2015-06-04 01:30:00	0.0954321	17.1
2015-06-04 02:00:00	0.0954321	17
2015-06-04 02:30:00	0.0954321	16.9
2015-06-04 03:00:00	0.0954321	16.8
2015-06-04 03:30:00	0.0949642	16.7
2015-06-04 04:00:00	0.0949642	16.6
2015-06-04 04:30:00	0.0949642	16.4
2015-06-04 05:00:00	0.0944958	16.2
2015-06-04 05:30:00	0.0944958	16
2015-06-04 06:00:00	0.0944958	15.8
2015-06-04 06:30:00	0.0944958	15.6
2015-06-04 07:00:00	0.0940271	15.4
2015-06-04 07:30:00	0.0940271	15.2
2015-06-04 08:00:00	0.0940271	15.1
2015-06-04 08:30:00	0.0940271	15.1
2015-06-04 09:00:00	0.0940271	15.2
2015-06-04 09:30:00	0.0940271	15.4
2015-06-04 10:00:00	0.0940271	15.6
2015-06-04 10:30:00	0.0944958	16
2015-06-04 11:00:00	0.0944958	16.5
2015-06-04 11:30:00	0.0949642	17.1
2015-06-04 12:00:00	0.0954321	17.8
2015-06-04 12:30:00	0.0958997	18.5
2015-06-04 13:00:00	0.0963668	19.2
2015-06-04 13:30:00	0.0968336	19.8
2015-06-04 14:00:00	0.0973	20.3
2015-06-04 14:30:00	0.0977661	20.8
2015-06-04 15:00:00	0.0982317	21.4
2015-06-04 15:30:00	0.0982317	21.9
2015-06-04 16:00:00	0.0982317	22.2
2015-06-04 16:30:00	0.098697	22.5
2015-06-04 17:00:00	0.098697	22.7
2015-06-04 17:30:00	0.0982317	22.8
2015-06-04 18:00:00	0.098697	22.9
2015-06-04 18:30:00	0.0982317	22.8
2015-06-04 19:00:00	0.0982317	22.7
2015-06-04 19:30:00	0.0982317	22.5
2015-06-04 20:00:00	0.0977661	22.2
2015-06-04 20:30:00	0.0973	21.9
2015-06-04 21:00:00	0.0973	21.5
2015-06-04 21:30:00	0.0968336	21.1
2015-06-04 22:00:00	0.0968336	20.7
2015-06-04 22:30:00	0.0963668	20.3
2015-06-04 23:00:00	0.0958997	20
2015-06-04 23:30:00	0.0954321	19.6
2015-06-05	0.0954321	19.3
2015-06-05 00:30:00	0.0954321	19
2015-06-05 01:00:00	0.0949642	18.7
2015-06-05 01:30:00	0.0949642	18.4
2015-06-05 02:00:00	0.0944958	18.1
2015-06-05 02:30:00	0.0944958	17.8
2015-06-05 03:00:00	0.0940271	17.5
2015-06-05 03:30:00	0.0940271	17.3
2015-06-05 04:00:00	0.0940271	17
2015-06-05 04:30:00	0.0935581	16.8
2015-06-05 05:00:00	0.0935581	16.6
2015-06-05 05:30:00	0.0935581	16.4
2015-06-05 06:00:00	0.0930886	16.2
2015-06-05 06:30:00	0.0930886	16
2015-06-05 07:00:00	0.0930886	15.9
2015-06-05 07:30:00	0.0926188	15.8
2015-06-05 08:00:00	0.0926188	15.8
2015-06-05 08:30:00	0.0930886	16
2015-06-05 09:00:00	0.0926188	16.3
2015-06-05 09:30:00	0.0930886	16.7
2015-06-05 10:00:00	0.0935581	17.2
2015-06-05 10:30:00	0.0940271	17.9
2015-06-05 11:00:00	0.0940271	18.6
2015-06-05 11:30:00	0.0949642	19.4
2015-06-05 12:00:00	0.0954321	20.1
2015-06-05 12:30:00	0.0954321	20.8
2015-06-05 13:00:00	0.0958997	21.5
2015-06-05 13:30:00	0.0963668	21.9
2015-06-05 14:00:00	0.0963668	22.3
2015-06-05 14:30:00	0.0968336	22.7
2015-06-05 15:00:00	0.0968336	23.2
2015-06-05 15:30:00	0.0973	23.6
2015-06-05 16:00:00	0.0973	24.1
2015-06-05 16:30:00	0.0977661	24.5
2015-06-05 17:00:00	0.0973	24.7
2015-06-05 17:30:00	0.0977661	24.8
2015-06-05 18:00:00	0.0973	24.8
2015-06-05 18:30:00	0.0973	24.7
2015-06-05 19:00:00	0.0973	24.6
2015-06-05 19:30:00	0.0973	24.5
2015-06-05 20:00:00	0.0973	24.2
2015-06-05 20:30:00	0.0968336	23.9
2015-06-05 21:00:00	0.0963668	23.5
2015-06-05 21:30:00	0.0963668	23.1
2015-06-05 22:00:00	0.0954321	22.6
2015-06-05 22:30:00	0.0954321	22.2
2015-06-05 23:00:00	0.0954321	21.8
2015-06-05 23:30:00	0.0949642	21.4
2015-06-06	0.0944958	21.1
2015-06-06 00:30:00	0.0944958	20.8
2015-06-06 01:00:00	0.0944958	20.5
2015-06-06 01:30:00	0.0940271	20.3
2015-06-06 02:00:00	0.0940271	20.1
2015-06-06 02:30:00	0.0940271	19.9
2015-06-06 03:00:00	0.0935581	19.7
2015-06-06 03:30:00	0.0935581	19.5
2015-06-06 04:00:00	0.0930886	19.3
2015-06-06 04:30:00	0.0930886	19.1
2015-06-06 05:00:00	0.0930886	18.9
2015-06-06 05:30:00	0.0926188	18.7
2015-06-06 06:00:00	0.0926188	18.5
2015-06-06 06:30:00	0.0926188	18.3
2015-06-06 07:00:00	0.0926188	18.2
2015-06-06 07:30:00	0.0921485	18.1
2015-06-06 08:00:00	0.0921485	18.1
2015-06-06 08:30:00	0.0921485	18.2
2015-06-06 09:00:00	0.0921485	18.4
2015-06-06 09:30:00	0.0921485	18.7
2015-06-06 10:00:00	0.0926188	19.1
2015-06-06 10:30:00	0.0926188	19.5
2015-06-06 11:00:00	0.0930886	20
2015-06-06 11:30:00	0.0935581	20.5
2015-06-06 12:00:00	0.0940271	21.1
2015-06-06 12:30:00	0.0940271	21.6
2015-06-06 13:00:00	0.0940271	22.2
2015-06-06 13:30:00	0.0944958	22.9
2015-06-06 14:00:00	0.0949642	23.5
2015-06-06 14:30:00	0.0954321	24
2015-06-06 15:00:00	0.0954321	24.4
2015-06-06 15:30:00	0.0958997	24.8
2015-06-06 16:00:00	0.0958997	25.1
2015-06-06 16:30:00	0.0958997	25.4
2015-06-06 17:00:00	0.0958997	25.6
2015-06-06 17:30:00	0.0958997	25.7
2015-06-06 18:00:00	0.0958997	25.7
2015-06-06 18:30:00	0.0958997	25.7
2015-06-06 19:00:00	0.0958997	25.6
2015-06-06 19:30:00	0.0954321	25.4
2015-06-06 20:00:00	0.0954321	25.1
2015-06-06 20:30:00	0.0954321	24.8
2015-06-06 21:00:00	0.0949642	24.4
2015-06-06 21:30:00	0.0944958	24
2015-06-06 22:00:00	0.0940271	23.6
2015-06-06 22:30:00	0.0940271	23.1
2015-06-06 23:00:00	0.0935581	22.7
2015-06-06 23:30:00	0.0930886	22.3
2015-06-07	0.0930886	22
2015-06-07 00:30:00	0.0926188	21.6
2015-06-07 01:00:00	0.0926188	21.3
2015-06-07 01:30:00	0.0921485	21
2015-06-07 02:00:00	0.0921485	20.8
2015-06-07 02:30:00	0.0916779	20.5
2015-06-07 03:00:00	0.0916779	20.3
2015-06-07 03:30:00	0.0916779	20.1
2015-06-07 04:00:00	0.0912069	19.9
2015-06-07 04:30:00	0.0912069	19.7
2015-06-07 05:00:00	0.0912069	19.5
2015-06-07 05:30:00	0.0912069	19.4
2015-06-07 06:00:00	0.0907355	19.3
2015-06-07 06:30:00	0.0907355	19.1
2015-06-07 07:00:00	0.0907355	19.1
2015-06-07 07:30:00	0.0907355	19
2015-06-07 08:00:00	0.0902638	18.9
2015-06-07 08:30:00	0.0902638	18.8
2015-06-07 09:00:00	0.0902638	18.6
2015-06-07 09:30:00	0.0897916	18.5
2015-06-07 10:00:00	0.0897916	18.4
2015-06-07 10:30:00	0.0897916	18.3
2015-06-07 11:00:00	0.0897916	18.2
2015-06-07 11:30:00	0.0897916	18.2
2015-06-07 12:00:00	0.0897916	18.5
2015-06-07 12:30:00	0.0897916	18.8
2015-06-07 13:00:00	0.0902638	19.4
2015-06-07 13:30:00	0.0907355	20.1
2015-06-07 14:00:00	0.0912069	20.8
2015-06-07 14:30:00	0.0912069	21.4
2015-06-07 15:00:00	0.0916779	22
2015-06-07 15:30:00	0.0921485	22.4
2015-06-07 16:00:00	0.0926188	22.8
2015-06-07 16:30:00	0.0926188	23.2
2015-06-07 17:00:00	0.0926188	23.5
2015-06-07 17:30:00	0.0926188	23.7
2015-06-07 18:00:00	0.0926188	23.6
2015-06-07 18:30:00	0.0926188	23.6
2015-06-07 19:00:00	0.0926188	23.5
2015-06-07 19:30:00	0.0921485	23.4
2015-06-07 20:00:00	0.0921485	23.1
2015-06-07 20:30:00	0.0921485	22.8
2015-06-07 21:00:00	0.0916779	22.5
2015-06-07 21:30:00	0.0912069	22.1
2015-06-07 22:00:00	0.0907355	21.7
2015-06-07 22:30:00	0.0907355	21.3
2015-06-07 23:00:00	0.0902638	20.9
2015-06-07 23:30:00	0.0897916	20.5
2015-06-08	0.0897916	20.2
2015-06-08 00:30:00	0.0893191	19.8
2015-06-08 01:00:00	0.0893191	19.5
2015-06-08 01:30:00	0.0893191	19.2
2015-06-08 02:00:00	0.0888462	18.9
2015-06-08 02:30:00	0.0883729	18.6
2015-06-08 03:00:00	0.0883729	18.3
2015-06-08 03:30:00	0.0878992	18.1
2015-06-08 04:00:00	0.0878992	17.8
2015-06-08 04:30:00	0.0878992	17.6
2015-06-08 05:00:00	0.0874251	17.3
2015-06-08 05:30:00	0.0874251	17.1
2015-06-08 06:00:00	0.0874251	16.9
2015-06-08 06:30:00	0.0869507	16.7
2015-06-08 07:00:00	0.0869507	16.6
2015-06-08 07:30:00	0.0864758	16.6
2015-06-08 08:00:00	0.0869507	16.6
2015-06-08 08:30:00	0.0869507	16.8
2015-06-08 09:00:00	0.0869507	17
2015-06-08 09:30:00	0.0869507	17.4
2015-06-08 10:00:00	0.0869507	17.9
2015-06-08 10:30:00	0.0874251	18.5
2015-06-08 11:00:00	0.0878992	19.3
2015-06-08 11:30:00	0.0883729	20
2015-06-08 12:00:00	0.0888462	20.8
2015-06-08 12:30:00	0.0893191	21.6
2015-06-08 13:00:00	0.0897916	22.4
2015-06-08 13:30:00	0.0902638	23.2
2015-06-08 14:00:00	0.0907355	23.9
2015-06-08 14:30:00	0.0912069	24.6
2015-06-08 15:00:00	0.0912069	25.3
2015-06-08 15:30:00	0.0916779	25.9
2015-06-08 16:00:00	0.0921485	26.3
2015-06-08 16:30:00	0.0921485	26.7
2015-06-08 17:00:00	0.0926188	27
2015-06-08 17:30:00	0.0926188	27.2
2015-06-08 18:00:00	0.0926188	27.2
2015-06-08 18:30:00	0.0926188	27.1
2015-06-08 19:00:00	0.0921485	27.1
2015-06-08 19:30:00	0.0921485	26.8
2015-06-08 20:00:00	0.0921485	26.6
2015-06-08 20:30:00	0.0916779	26.2
2015-06-08 21:00:00	0.0912069	25.7
2015-06-08 21:30:00	0.0912069	25.3
2015-06-08 22:00:00	0.0907355	24.8
2015-06-08 22:30:00	0.0902638	24.4
2015-06-08 23:00:00	0.0897916	24
2015-06-08 23:30:00	0.0897916	23.7
2015-06-09	0.0897916	23.3
2015-06-09 00:30:00	0.0893191	23
2015-06-09 01:00:00	0.0893191	22.8
2015-06-09 01:30:00	0.0888462	22.5
2015-06-09 02:00:00	0.0888462	22.3
2015-06-09 02:30:00	0.0883729	22
2015-06-09 03:00:00	0.0883729	21.8
2015-06-09 03:30:00	0.0883729	21.6
2015-06-09 04:00:00	0.0878992	21.4
2015-06-09 04:30:00	0.0878992	21.2
2015-06-09 05:00:00	0.0874251	21
2015-06-09 05:30:00	0.0874251	20.8
2015-06-09 06:00:00	0.0874251	20.6
2015-06-09 06:30:00	0.0869507	20.4
2015-06-09 07:00:00	0.0869507	20.3
2015-06-09 07:30:00	0.0869507	20.1
2015-06-09 08:00:00	0.0869507	20.1
2015-06-09 08:30:00	0.0864758	20.2
2015-06-09 09:00:00	0.0864758	20.3
2015-06-09 09:30:00	0.0864758	20.4
2015-06-09 10:00:00	0.0864758	20.6
2015-06-09 10:30:00	0.0864758	20.8
2015-06-09 11:00:00	0.0864758	20.9
2015-06-09 11:30:00	0.0864758	21.1
2015-06-09 12:00:00	0.0864758	21.5
2015-06-09 12:30:00	0.0869507	21.9
2015-06-09 13:00:00	0.0869507	22.4
2015-06-09 13:30:00	0.0874251	22.9
2015-06-09 14:00:00	0.0874251	23.6
2015-06-09 14:30:00	0.0878992	24.1
2015-06-09 15:00:00	0.0878992	24.5
2015-06-09 15:30:00	0.0878992	24.8
2015-06-09 16:00:00	0.0883729	25.1
2015-06-09 16:30:00	0.0883729	25.3
2015-06-09 17:00:00	0.0883729	25.3
2015-06-09 17:30:00	0.0883729	25.3
2015-06-09 18:00:00	0.0883729	25.3
2015-06-09 18:30:00	0.0878992	25.2
2015-06-09 19:00:00	0.0878992	25.2
2015-06-09 19:30:00	0.0878992	25.1
2015-06-09 20:00:00	0.0878992	24.9
2015-06-09 20:30:00	0.0874251	24.6
2015-06-09 21:00:00	0.0874251	24.4
2015-06-09 21:30:00	0.0874251	24.1
2015-06-09 22:00:00	0.0869507	23.8
2015-06-09 22:30:00	0.0869507	23.5
2015-06-09 23:00:00	0.0864758	23.2
2015-06-09 23:30:00	0.0864758	22.9
2015-06-10	0.0864758	22.6
2015-06-10 00:30:00	0.0860006	22.2
2015-06-10 01:00:00	0.0860006	21.9
2015-06-10 01:30:00	0.085525	21.6
2015-06-10 02:00:00	0.085049	21.3
2015-06-10 02:30:00	0.085049	21
2015-06-10 03:00:00	0.085049	20.7
2015-06-10 03:30:00	0.0845726	20.5
2015-06-10 04:00:00	0.0845726	20.2
2015-06-10 04:30:00	0.0840958	20
2015-06-10 05:00:00	0.0840958	19.7
2015-06-10 05:30:00	0.0840958	19.5
2015-06-10 06:00:00	0.0836187	19.3
2015-06-10 06:30:00	0.0836187	19.1
2015-06-10 07:00:00	0.0836187	18.9
2015-06-10 07:30:00	0.0831411	18.8
2015-06-10 08:00:00	0.0831411	18.7
2015-06-10 08:30:00	0.0826632	18.7
2015-06-10 09:00:00	0.0826632	18.8
2015-06-10 09:30:00	0.0826632	19
2015-06-10 10:00:00	0.0826632	19.3
2015-06-10 10:30:00	0.0826632	19.6
2015-06-10 11:00:00	0.0826632	19.9
2015-06-10 11:30:00	0.0831411	20.3
2015-06-10 12:00:00	0.0831411	20.7
2015-06-10 12:30:00	0.0836187	21.1
2015-06-10 13:00:00	0.0836187	21.5
2015-06-10 13:30:00	0.0836187	21.9
2015-06-10 14:00:00	0.0840958	22.2
2015-06-10 14:30:00	0.0840958	22.6
2015-06-10 15:00:00	0.0840958	22.9
2015-06-10 15:30:00	0.0840958	23.2
2015-06-10 16:00:00	0.0845726	23.4
2015-06-10 16:30:00	0.0845726	23.7
2015-06-10 17:00:00	0.0845726	23.8
2015-06-10 17:30:00	0.0845726	23.8
2015-06-10 18:00:00	0.0845726	23.8
2015-06-10 18:30:00	0.0840958	23.7
2015-06-10 19:00:00	0.0840958	23.7
2015-06-10 19:30:00	0.0840958	23.5
2015-06-10 20:00:00	0.0840958	23.3
2015-06-10 20:30:00	0.0840958	23
2015-06-10 21:00:00	0.0836187	22.6
2015-06-10 21:30:00	0.0836187	22.3
2015-06-10 22:00:00	0.0831411	21.9
2015-06-10 22:30:00	0.0831411	21.6
2015-06-10 23:00:00	0.0826632	21.3
2015-06-10 23:30:00	0.0826632	20.9
2015-06-11	0.0821849	20.6
2015-06-11 00:30:00	0.0821849	20.3
2015-06-11 01:00:00	0.0817062	20
2015-06-11 01:30:00	0.0817062	19.7
2015-06-11 02:00:00	0.0812271	19.4
2015-06-11 02:30:00	0.0812271	19.2
2015-06-11 03:00:00	0.0812271	18.9
2015-06-11 03:30:00	0.0807476	18.6
2015-06-11 04:00:00	0.0807476	18.4
2015-06-11 04:30:00	0.0807476	18.1
2015-06-11 05:00:00	0.0802678	17.9
2015-06-11 05:30:00	0.0802678	17.7
2015-06-11 06:00:00	0.0797875	17.4
2015-06-11 06:30:00	0.0797875	17.2
2015-06-11 07:00:00	0.0793069	17
2015-06-11 07:30:00	0.0793069	16.9
2015-06-11 08:00:00	0.0793069	16.8
2015-06-11 08:30:00	0.0793069	16.9
2015-06-11 09:00:00	0.0793069	17.2
2015-06-11 09:30:00	0.0793069	17.5
2015-06-11 10:00:00	0.0793069	17.9
2015-06-11 10:30:00	0.0793069	18.4
2015-06-11 11:00:00	0.0797875	19
2015-06-11 11:30:00	0.0797875	19.6
2015-06-11 12:00:00	0.0802678	20.3
2015-06-11 12:30:00	0.0807476	21
2015-06-11 13:00:00	0.0807476	21.6
2015-06-11 13:30:00	0.0812271	22.3
2015-06-11 14:00:00	0.0817062	23
2015-06-11 14:30:00	0.0821849	23.6
[truncated: 6,834 more rows]
