# Supplementary material for: Linking diffuse radiation and ecosystem productivity of a desert steppe ecosystem
Source: PeerJ. 2020 May 5;8:e9043. doi: 10.7717/peerj.9043 (PMC7207212; doi:10.7717/peerj.9043)
Supplement: Supplemental Information 9 [file peerj-08-9043-s009.xls]

## Sheet: Sheet1
date	time	daytime	co2_flux	u*	S	PAR_tot	air_temperature	RH	VPD
[yyyy-mm-dd]	[HH:MM]	[T/F]	[µmol+1s-1m-2]	[m+1s-1]	"W/m^2"	"umol/m^2/s"	°C	[%]	[KPa]
2014-05-01	1899-12-31	F	0.286761	0.659124	-3.2819	-0.0246293	15.8507	33.7149	1.19004
2014-05-01	1899-12-31 00:30:00	F	0.645007	0.650946	-3.87417	-0.0222158	14.8197	35.0844	1.0908
2014-05-01	1899-12-31 01:00:00	F	5.84401	0.701623	-3.93449	-0.0219761	14.3958	36.5456	1.03746
2014-05-01	1899-12-31 01:30:00	F	0.567675	0.531978	-3.07048	-0.00893587	14.5933	37.9108	1.02816
2014-05-01	1899-12-31 02:00:00	F	0.638114	0.539154	-2.53678	-0.00724552	14.2329	39.8571	0.972984
2014-05-01	1899-12-31 02:30:00	F	1.09644	0.599743	-2.0489	-0.0128007	13.4263	48.0049	0.79819
2014-05-01	1899-12-31 03:00:00	F	0.250749	0.669941	-1.34997	-0.0118348	12.8103	52.794	0.696071
2014-05-01	1899-12-31 03:30:00	F	0.27537	0.868087	-1.31996	-0.0318826	11.8801	52.4729	0.659246
2014-05-01	1899-12-31 04:00:00	F	0.13941	0.968954	-1.12245	-0.0219811	11.4288	56.0362	0.591892
2014-05-01	1899-12-31 04:30:00	F	0.356223	0.807936	-1.17851	-0.00797154	10.8971	60.2759	0.516263
2014-05-01	1899-12-31 05:00:00	F	0.373338	0.759282	-1.23151	-0.00579776	10.3965	62.0111	0.477515
2014-05-01	1899-12-31 05:30:00	T	-0.704117	0.491372	-1.69355	-0.00386539	8.86083	72.8368	0.307961
2014-05-01	1899-12-31 06:00:00	T	-2.25241	0.732019	-3.86048	0.105346	6.67313	94.0966	0.0576509
2014-05-01	1899-12-31 06:30:00	T	3.66473	0.711921	-1.41411	3.36046	4.80053	100	0
2014-05-01	1899-12-31 07:00:00	T	1.3917	0.642947	3.02835	10.8434	4.51271	100	0
2014-05-01	1899-12-31 07:30:00	T	3.77102	0.596243	6.6853	20.245	4.69122	100	0
2014-05-01	1899-12-31 08:00:00	T	0.454706	0.559482	21.3043	50.4154	4.27111	100	0
2014-05-01	1899-12-31 08:30:00	T	-0.209348	0.49241	29.0381	69.3145	4.15327	100	0
2014-05-01	1899-12-31 09:00:00	T	-0.0352728	0.55509	48.3084	111.555	4.11786	100	0
2014-05-01	1899-12-31 09:30:00	T	1.26867	0.607646	74.0352	164.509	4.12499	100	0
2014-05-01	1899-12-31 10:00:00	T	0.611387	0.439005	90.297	201.58	4.1047	100	0
2014-05-01	1899-12-31 10:30:00	T	-1.19085	0.459404	119.533	259.73	4.03767	100	0
2014-05-01	1899-12-31 11:00:00	T	-0.728125	0.424261	365.799	727.44	4.83254	100	0
2014-05-01	1899-12-31 11:30:00	T	0.0192778	0.392391	638.478	1232	6.20311	100	0
2014-05-01	1899-12-31 12:00:00	T	0.0217651	0.421411	549.773	1084.27	7.03005	100	0
2014-05-01	1899-12-31 12:30:00	T	0.439151	0.316314	694.686	1339.96	7.91589	94.8029	0.0552579
2014-05-01	1899-12-31 13:00:00	T	-0.167912	0.58904	676.495	1310.42	9.68564	63.938	0.432225
2014-05-01	1899-12-31 13:30:00	T	0.563679	0.698014	932.602	1762.66	10.7243	57.0765	0.551475
2014-05-01	1899-12-31 14:00:00	T	-0.201144	0.668452	908.062	1717.93	10.9716	48.0823	0.678123
2014-05-01	1899-12-31 14:30:00	T	0.338503	0.698472	798.053	1512.89	11.503	40.2894	0.807906
2014-05-01	1899-12-31 15:00:00	T	0.046373	0.700317	784.567	1487.28	11.7025	35.6995	0.881581
2014-05-01	1899-12-31 15:30:00	T	0.332788	0.690647	665.478	1269.68	11.8607	33.5469	0.920669
2014-05-01	1899-12-31 16:00:00	T	-0.293668	0.688265	578.536	1112.55	11.8088	31.3517	0.947833
2014-05-01	1899-12-31 16:30:00	T	0.418071	0.666203	501.208	971.369	11.8518	29.0092	0.982971
2014-05-01	1899-12-31 17:00:00	T	-0.352353	0.63113	407.965	796.098	11.6617	29.47	0.964408
2014-05-01	1899-12-31 17:30:00	T	-0.0648039	0.630084	355.051	706.614	11.6658	29.1172	0.969493
2014-05-01	1899-12-31 18:00:00	T	-0.0321201	0.687644	261.328	523.712	11.6047	27.2066	0.991619
2014-05-01	1899-12-31 18:30:00	F	-0.22196	0.576033	107.155	218.507	11.0197	28.1059	0.942115
2014-05-01	1899-12-31 19:00:00	F	0.0534288	0.489297	84.2921	164.858	10.8855	27.9278	0.936064
2014-05-01	1899-12-31 19:30:00	F	0.430395	0.456678	28.436	56.371	10.3869	30.7067	0.870557
2014-05-01	1899-12-31 20:00:00	F	0.151301	0.412898	-0.500453	7.98226	9.97014	31.3067	0.839293
2014-05-01	1899-12-31 20:30:00	F	0.497877	0.414467	-4.82043	0.0434889	8.98884	39.885	0.687558
2014-05-01	1899-12-31 21:00:00	F	0.0467036	0.587983	-4.40296	-0.029721	7.51867	56.3995	0.451267
2014-05-01	1899-12-31 21:30:00	F	0.336711	0.551852	-4.1112	-0.0449485	6.47791	65.3517	0.33389
2014-05-01	1899-12-31 22:00:00	F	0.0844913	0.464594	-4.16931	-0.0490615	5.76909	70.7028	0.268827
2014-05-01	1899-12-31 22:30:00	F	0.160759	0.321489	-4.44417	-0.0422982	5.05764	74.9639	0.218644
2014-05-01	1899-12-31 23:00:00	F	0.125393	0.269909	-4.32332	-0.0362584	4.49097	77.8229	0.186158
2014-05-01	1899-12-31 23:30:00	F	0.0453849	0.130933	-4.33427	-0.0379543	4.00143	81.0814	0.153443
2014-05-02	1899-12-31	F	0.130826	0.177616	-3.89414	-0.0522213	3.8558	81.391	0.149394
2014-05-02	1899-12-31 00:30:00	F	0.0882352	0.196122	-4.0805	-0.0275627	3.46189	84.2606	0.122896
2014-05-02	1899-12-31 01:00:00	F	0.104042	0.255063	-3.89041	-0.0145074	3.28139	84.4501	0.119878
2014-05-02	1899-12-31 01:30:00	F	-0.0240812	0.253669	-4.09384	-0.0132988	2.9518	85.4717	0.109419
2014-05-02	1899-12-31 02:00:00	F	0.110109	0.306045	-4.17502	-0.0132991	2.45989	87.9315	0.0877713
2014-05-02	1899-12-31 02:30:00	F	0.186347	0.23104	-4.37834	-0.0169267	1.84613	92.5999	0.0515122
2014-05-02	1899-12-31 03:00:00	F	0.348809	0.275298	-4.30356	-0.0154763	1.55244	95.7481	0.0289813
2014-05-02	1899-12-31 03:30:00	F	0.0402402	0.236299	-4.25428	-0.0164443	1.30454	97.6258	0.015897
2014-05-02	1899-12-31 04:00:00	F	-0.206251	0.139829	-4.3623	-0.0130592	0.642352	100	0
2014-05-02	1899-12-31 04:30:00	F	-0.157826	0.0981697	-3.15598	-0.0166877	0.628702	100	0
2014-05-02	1899-12-31 05:00:00	T	-0.00494881	0.0648447	-2.53434	-0.0133026	0.904187	100	0
2014-05-02	1899-12-31 05:30:00	T	-0.106214	0.0704923	-3.36739	-0.00362798	0.715637	100	0
2014-05-02	1899-12-31 06:00:00	T	0.0510456	0.0678453	-1.24036	3.90394	0.686998	100	0
2014-05-02	1899-12-31 06:30:00	T	0.0610918	0.095415	34.6369	53.4952	0.700144	100	0
2014-05-02	1899-12-31 07:00:00	T	0.421334	0.168911	123.617	195.24	1.5247	97.4327	0.0174641
2014-05-02	1899-12-31 07:30:00	T	-0.460609	0.248546	235.452	387.572	2.83014	88.1972	0.0881274
2014-05-02	1899-12-31 08:00:00	T	-0.107373	0.2505	347.236	587.923	3.6048	80.0873	0.15706
2014-05-02	1899-12-31 08:30:00	T	-0.200044	0.238395	462.322	799.091	4.33961	74.8233	0.20911
2014-05-02	1899-12-31 09:00:00	T	-0.397988	0.267181	571.554	1003.52	5.00523	71.5982	0.247135
2014-05-02	1899-12-31 09:30:00	T	-0.167104	0.262613	670.963	1191.82	5.66183	70.0661	0.272635
2014-05-02	1899-12-31 10:00:00	T	0.216524	0.213874	758.532	1362.04	6.67775	64.1955	0.349812
2014-05-02	1899-12-31 10:30:00	T	-0.0144467	0.227694	831.711	1514.41	7.3568	60.0995	0.408422
2014-05-02	1899-12-31 11:00:00	T	0.421285	0.155959	893.093	1636.75	8.84298	51.2917	0.551614
2014-05-02	1899-12-31 11:30:00	T	0.0562232	0.353748	955.628	1753.94	9.24632	42.0369	0.674557
2014-05-02	1899-12-31 12:00:00	T	0.146078	0.39981	988.212	1826.32	9.91471	39.1843	0.740274
2014-05-02	1899-12-31 12:30:00	T	0.0189074	0.428589	1013.61	1887.67	10.4352	38.7732	0.771681
2014-05-02	1899-12-31 13:00:00	T	0.426777	0.308617	1005.61	1894.77	10.7659	37.3382	0.80737
2014-05-02	1899-12-31 13:30:00	T	-0.098463	0.356192	1000.92	1891.84	11.2039	33.8185	0.877912
2014-05-02	1899-12-31 14:00:00	T	0.30533	0.300429	964.709	1841.68	11.8558	32.6442	0.932875
2014-05-02	1899-12-31 14:30:00	T	0.163663	0.358101	923.191	1771.08	12.0227	30.746	0.969788
2014-05-02	1899-12-31 15:00:00	T	0.234295	0.473658	873.191	1680.2	12.7842	24.8616	1.1062
2014-05-02	1899-12-31 15:30:00	T	0.254096	0.449857	805.64	1556.13	13.243	21.5639	1.18992
2014-05-02	1899-12-31 16:00:00	T	-0.42262	0.379056	732.156	1413.88	13.2343	20.116	1.21121
2014-05-02	1899-12-31 16:30:00	T	-0.166224	0.420408	630.146	1231.08	13.7638	19.3479	1.26577
2014-05-02	1899-12-31 17:00:00	T	-0.498122	0.472989	522.162	1034.57	13.7243	20.1251	1.25035
2014-05-02	1899-12-31 17:30:00	T	-0.259862	0.451572	404.885	823.768	13.5837	21.3326	1.22023
2014-05-02	1899-12-31 18:00:00	T	-0.38762	0.433901	291.656	612.636	13.5379	22.5467	1.19782
2014-05-02	1899-12-31 18:30:00	T	-0.206897	0.259654	185.008	406.359	13.4903	23.2436	1.18337
2014-05-02	1899-12-31 19:00:00	F	-0.0135663	0.29012	97.4691	220.896	13.4406	22.221	1.19526
2014-05-02	1899-12-31 19:30:00	F	0.0293011	0.181107	30.3241	75.476	12.7724	23.4611	1.12594
2014-05-02	1899-12-31 20:00:00	F	-0.0106818	0.0346824	-0.835089	9.88322	12.4091	24.2594	1.08795
2014-05-02	1899-12-31 20:30:00	F	0.063778	0.0871339	-3.67038	0.0741624	11.8052	25.876	1.02321
2014-05-02	1899-12-31 21:00:00	F	-0.169933	0.0603748	-4.28128	-0.0144971	11.1193	27.7798	0.952673
2014-05-02	1899-12-31 21:30:00	F	0.198155	0.037432	-3.78703	-0.00894066	11.3919	25.9207	0.995025
2014-05-02	1899-12-31 22:00:00	F	-0.196925	0.10433	-3.8713	-0.0101492	11.1182	26.4126	0.970641
2014-05-02	1899-12-31 22:30:00	F	0.0631029	0.139497	-4.45218	-0.0173992	9.94783	31.211	0.839207
2014-05-02	1899-12-31 23:00:00	F	0.0582273	0.188855	-4.52382	-0.0302078	9.06795	34.8577	0.749057
2014-05-02	1899-12-31 23:30:00	F	-0.020379	0.164816	-4.14103	-0.00628347	9.16603	33.7209	0.76719
2014-05-03	1899-12-31	F	-0.771082	0.241822	-3.67314	-0.00990876	9.5523	33.343	0.791891
2014-05-03	1899-12-31 00:30:00	F	0.250127	0.340303	-4.27086	-0.00942508	9.78917	43.5836	0.680957
2014-05-03	1899-12-31 01:00:00	F	0.284153	0.398175	-4.05834	-0.0103911	9.42619	50.3633	0.584677
2014-05-03	1899-12-31 01:30:00	F	0.308034	0.458247	-3.97044	-0.00942426	9.30224	53.0998	0.547848
2014-05-03	1899-12-31 02:00:00	F	0.199642	0.398708	-4.11528	-0.0128072	8.71859	56.3588	0.49008
2014-05-03	1899-12-31 02:30:00	F	0.260644	0.365385	-3.93273	-0.0195735	8.20507	59.1515	0.443018
2014-05-03	1899-12-31 03:00:00	F	0.288742	0.357504	-4.06764	-0.0200577	7.89424	60.9675	0.414463
2014-05-03	1899-12-31 03:30:00	-9999	-9999	-9999	-3.78369	-0.00700834		-9999
2014-05-03	1899-12-31 04:00:00	-9999	-9999	-9999	-3.72661	-0.0055584		-9999
2014-05-03	1899-12-31 04:30:00	-9999	-9999	-9999	-3.41424	-0.00507496		-9999
2014-05-03	1899-12-31 05:00:00	-9999	-9999	-9999	-3.82877	-0.0135331		-9999
2014-05-03	1899-12-31 05:30:00	-9999	-9999	-9999	-3.77048	0.00241681		-9999
2014-05-03	1899-12-31 06:00:00	-9999	-9999	-9999	-1.45135	4.46978		-9999
2014-05-03	1899-12-31 06:30:00	-9999	-9999	-9999	34.8047	60.1892		-9999
2014-05-03	1899-12-31 07:00:00	-9999	-9999	-9999	123.027	202.16		-9999
2014-05-03	1899-12-31 07:30:00	-9999	-9999	-9999	180.873	317.004		-9999
2014-05-03	1899-12-31 08:00:00	-9999	-9999	-9999	259.865	466.567		-9999
2014-05-03	1899-12-31 08:30:00	-9999	-9999	-9999	256.551	481.334		-9999
2014-05-03	1899-12-31 09:00:00	-9999	-9999	-9999	337.625	630.606		-9999
2014-05-03	1899-12-31 09:30:00	-9999	-9999	-9999	413.717	770.01		-9999
2014-05-03	1899-12-31 10:00:00	-9999	-9999	-9999	462.429	863.256		-9999
2014-05-03	1899-12-31 10:30:00	-9999	-9999	-9999	695.058	1265.46		-9999
2014-05-03	1899-12-31 11:00:00	-9999	-9999	-9999	854.586	1546.95		-9999
2014-05-03	1899-12-31 11:30:00	-9999	-9999	-9999	956.509	1732.82		-9999
2014-05-03	1899-12-31 12:00:00	-9999	-9999	-9999	691.865	1270.02		-9999
2014-05-03	1899-12-31 12:30:00	-9999	-9999	-9999	729.834	1345.67		-9999
2014-05-03	1899-12-31 13:00:00	-9999	-9999	-9999	810.277	1509.13		-9999
2014-05-03	1899-12-31 13:30:00	-9999	-9999	-9999	772.79	1446.15		-9999
2014-05-03	1899-12-31 14:00:00	-9999	-9999	-9999	771.78	1453.51		-9999
2014-05-03	1899-12-31 14:30:00	-9999	-9999	-9999	796.85	1501.26		-9999
2014-05-03	1899-12-31 15:00:00	-9999	-9999	-9999	779.328	1482.73		-9999
2014-05-03	1899-12-31 15:30:00	-9999	-9999	-9999	705.191	1344.69		-9999
2014-05-03	1899-12-31 16:00:00	-9999	-9999	-9999	684.443	1310.38		-9999
2014-05-03	1899-12-31 16:30:00	-9999	-9999	-9999	579.486	1128.18		-9999
2014-05-03	1899-12-31 17:00:00	-9999	-9999	-9999	528.664	1039.83		-9999
2014-05-03	1899-12-31 17:30:00	-9999	-9999	-9999	420.364	840.883		-9999
2014-05-03	1899-12-31 18:00:00	-9999	-9999	-9999	315.522	651.033		-9999
2014-05-03	1899-12-31 18:30:00	-9999	-9999	-9999	203.246	438.414		-9999
2014-05-03	1899-12-31 19:00:00	-9999	-9999	-9999	106.579	240.412		-9999
2014-05-03	1899-12-31 19:30:00	-9999	-9999	-9999	33.1955	80.2346		-9999
2014-05-03	1899-12-31 20:00:00	-9999	-9999	-9999	-1.11072	11.3124		-9999
2014-05-03	1899-12-31 20:30:00	-9999	-9999	-9999	-6.49861	0.109449		-9999
2014-05-03	1899-12-31 21:00:00	-9999	-9999	-9999	-6.07893	-0.00483321		-9999
2014-05-03	1899-12-31 21:30:00	-9999	-9999	-9999	-6.06154	-0.0111175		-9999
2014-05-03	1899-12-31 22:00:00	-9999	-9999	-9999	-5.97641	-0.0161944		-9999
2014-05-03	1899-12-31 22:30:00	-9999	-9999	-9999	-5.37181	-0.03795		-9999
2014-05-03	1899-12-31 23:00:00	-9999	-9999	-9999	-5.18762	-0.0314256		-9999
2014-05-03	1899-12-31 23:30:00	-9999	-9999	-9999	-5.17542	-0.0575361		-9999
2014-05-04	1899-12-31	-9999	-9999	-9999	-5.01461	-0.0604399		-9999
2014-05-04	1899-12-31 00:30:00	-9999	-9999	-9999	-5.61859	-0.055122		-9999
2014-05-04	1899-12-31 01:00:00	-9999	-9999	-9999	-5.50587	-0.0572991		-9999
2014-05-04	1899-12-31 01:30:00	-9999	-9999	-9999	-5.03129	-0.0251448		-9999
2014-05-04	1899-12-31 02:00:00	-9999	-9999	-9999	-3.58136	-0.0311916		-9999
2014-05-04	1899-12-31 02:30:00	-9999	-9999	-9999	-2.88167	-0.0411069		-9999
2014-05-04	1899-12-31 03:00:00	-9999	-9999	-9999	-3.15648	-0.0350636		-9999
2014-05-04	1899-12-31 03:30:00	-9999	-9999	-9999	-4.61409	-0.0181367		-9999
2014-05-04	1899-12-31 04:00:00	-9999	-9999	-9999	-4.75745	-0.0302282		-9999
2014-05-04	1899-12-31 04:30:00	-9999	-9999	-9999	-4.7468	-0.0178953		-9999
2014-05-04	1899-12-31 05:00:00	-9999	-9999	-9999	-4.72948	-0.0239415		-9999
2014-05-04	1899-12-31 05:30:00	-9999	-9999	-9999	-4.42176	0.00435325		-9999
2014-05-04	1899-12-31 06:00:00	-9999	-9999	-9999	-1.96453	5.10788		-9999
2014-05-04	1899-12-31 06:30:00	-9999	-9999	-9999	45.0214	63.4453		-9999
2014-05-04	1899-12-31 07:00:00	-9999	-9999	-9999	146.212	221.753		-9999
2014-05-04	1899-12-31 07:30:00	-9999	-9999	-9999	260.654	414.936		-9999
2014-05-04	1899-12-31 08:00:00	-9999	-9999	-9999	378.05	620.922		-9999
2014-05-04	1899-12-31 08:30:00	-9999	-9999	-9999	494.518	831.035		-9999
2014-05-04	1899-12-31 09:00:00	-9999	-9999	-9999	599.252	1025.59		-9999
2014-05-04	1899-12-31 09:30:00	-9999	-9999	-9999	695.446	1206.76		-9999
2014-05-04	1899-12-31 10:00:00	-9999	-9999	-9999	786.204	1380.48		-9999
2014-05-04	1899-12-31 10:30:00	-9999	-9999	-9999	863.042	1534.97		-9999
2014-05-04	1899-12-31 11:00:00	-9999	-9999	-9999	931.087	1673.19		-9999
2014-05-04	1899-12-31 11:30:00	-9999	-9999	-9999	978.876	1780.8		-9999
2014-05-04	1899-12-31 12:00:00	-9999	-9999	-9999	1005.62	1853.55		-9999
2014-05-04	1899-12-31 12:30:00	-9999	-9999	-9999	1026.2	1906.04		-9999
2014-05-04	1899-12-31 13:00:00	-9999	-9999	-9999	1025.12	1922.77		-9999
2014-05-04	1899-12-31 13:30:00	-9999	-9999	-9999	1017.16	1919.13		-9999
2014-05-04	1899-12-31 14:00:00	-9999	-9999	-9999	992.044	1881.7		-9999
2014-05-04	1899-12-31 14:30:00	-9999	-9999	-9999	952.532	1816.77		-9999
2014-05-04	1899-12-31 15:00:00	-9999	-9999	-9999	891.513	1712.68		-9999
2014-05-04	1899-12-31 15:30:00	-9999	-9999	-9999	824.545	1590.88		-9999
2014-05-04	1899-12-31 16:00:00	-9999	-9999	-9999	738.379	1437.7		-9999
2014-05-04	1899-12-31 16:30:00	-9999	-9999	-9999	640.263	1263.69		-9999
2014-05-04	1899-12-31 17:00:00	-9999	-9999	-9999	541.684	1080.95		-9999
2014-05-04	1899-12-31 17:30:00	-9999	-9999	-9999	428.542	877.413		-9999
2014-05-04	1899-12-31 18:00:00	-9999	-9999	-9999	317.161	668.816		-9999
2014-05-04	1899-12-31 18:30:00	-9999	-9999	-9999	208.524	462.685		-9999
2014-05-04	1899-12-31 19:00:00	-9999	-9999	-9999	111.77	265.968		-9999
2014-05-04	1899-12-31 19:30:00	-9999	-9999	-9999	31.5347	86.8642		-9999
2014-05-04	1899-12-31 20:00:00	-9999	-9999	-9999	-1.83462	12.131		-9999
2014-05-04	1899-12-31 20:30:00	-9999	-9999	-9999	-6.09423	0.130694		-9999
2014-05-04	1899-12-31 21:00:00	-9999	-9999	-9999	-4.8528	-0.00918174		-9999
2014-05-04	1899-12-31 21:30:00	-9999	-9999	-9999	-5.38949	-0.00700769		-9999
2014-05-04	1899-12-31 22:00:00	-9999	-9999	-9999	-5.0852	-0.0210246		-9999
2014-05-04	1899-12-31 22:30:00	-9999	-9999	-9999	-4.56397	-0.0319012		-9999
2014-05-04	1899-12-31 23:00:00	-9999	-9999	-9999	-4.72907	-0.0401202		-9999
2014-05-04	1899-12-31 23:30:00	-9999	-9999	-9999	-4.25938	-0.0454389		-9999
2014-05-05	1899-12-31	-9999	-9999	-9999	-4.87476	-0.0456816		-9999
2014-05-05	1899-12-31 00:30:00	-9999	-9999	-9999	-3.95874	-0.0113603		-9999
2014-05-05	1899-12-31 01:00:00	-9999	-9999	-9999	-3.86096	-0.0348074		-9999
2014-05-05	1899-12-31 01:30:00	-9999	-9999	-9999	-4.08453	-0.0493111		-9999
2014-05-05	1899-12-31 02:00:00	-9999	-9999	-9999	-3.18742	-0.0338415		-9999
2014-05-05	1899-12-31 02:30:00	-9999	-9999	-9999	-3.89833	-0.0432694		-9999
2014-05-05	1899-12-31 03:00:00	-9999	-9999	-9999	-3.52155	-0.042786		-9999
2014-05-05	1899-12-31 03:30:00	-9999	-9999	-9999	-3.05993	-0.0381934		-9999
2014-05-05	1899-12-31 04:00:00	-9999	-9999	-9999	-4.05784	-0.0316678		-9999
2014-05-05	1899-12-31 04:30:00	-9999	-9999	-9999	-3.98662	-0.030944		-9999
2014-05-05	1899-12-31 05:00:00	-9999	-9999	-9999	-3.78251	-0.0410985		-9999
2014-05-05	1899-12-31 05:30:00	-9999	-9999	-9999	-4.30352	0.0106373		-9999
2014-05-05	1899-12-31 06:00:00	-9999	-9999	-9999	-0.818977	5.9251		-9999
2014-05-05	1899-12-31 06:30:00	-9999	-9999	-9999	51.6034	68.8867		-9999
2014-05-05	1899-12-31 07:00:00	-9999	-9999	-9999	151.973	230.475		-9999
2014-05-05	1899-12-31 07:30:00	-9999	-9999	-9999	264.508	423.887		-9999
2014-05-05	1899-12-31 08:00:00	-9999	-9999	-9999	383.724	634.999		-9999
2014-05-05	1899-12-31 08:30:00	-9999	-9999	-9999	495.901	840.593		-9999
2014-05-05	1899-12-31 09:00:00	-9999	-9999	-9999	601.363	1040.88		-9999
2014-05-05	1899-12-31 09:30:00	-9999	-9999	-9999	700.433	1230.97		-9999
2014-05-05	1899-12-31 10:00:00	T	-0.622251	0.197892	781.782	1395.65	14.0456	18.148	1.30833
2014-05-05	1899-12-31 10:30:00	T	-0.545534	0.159314	848.793	1538.38	14.5382	18.3252	1.34779
2014-05-05	1899-12-31 11:00:00	T	-0.207921	0.370484	916.373	1671.69	14.9713	18.0198	1.39116
2014-05-05	1899-12-31 11:30:00	T	-0.397074	0.369473	968.919	1780.37	14.9685	17.7117	1.39614
2014-05-05	1899-12-31 12:00:00	T	-0.182807	0.209318	1000.59	1858.68	15.437	16.9539	1.45207
2014-05-05	1899-12-31 12:30:00	T	-0.714219	0.424832	1012.7	1903.16	16.0026	16.0785	1.52149
2014-05-05	1899-12-31 13:00:00	T	-0.0648271	0.442386	1019.36	1925.99	16.6864	14.0347	1.62794
2014-05-05	1899-12-31 13:30:00	T	-0.116233	0.259296	1006.54	1916.39	16.9312	13.5289	1.66316
2014-05-05	1899-12-31 14:00:00	T	-0.213497	0.498721	979.841	1873.33	17.0101	13.5369	1.67134
2014-05-05	1899-12-31 14:30:00	T	-0.386633	0.413975	937.061	1805	17.4737	13.9077	1.7137
2014-05-05	1899-12-31 15:00:00	T	-0.594568	0.303719	888.729	1713.11	17.5867	13.9994	1.72413
2014-05-05	1899-12-31 15:30:00	T	-0.893368	0.562946	798.929	1551.99	17.7324	13.876	1.74254
2014-05-05	1899-12-31 16:00:00	T	-3.67018	0.265745	674.023	1313.88	17.5053	13.8572	1.71813
2014-05-05	1899-12-31 16:30:00	T	-0.580509	0.521994	618.085	1211.65	17.9152	13.5274	1.76984
2014-05-05	1899-12-31 17:00:00	T	-0.171927	0.294009	488.031	973.592	17.6492	13.396	1.74308
2014-05-05	1899-12-31 17:30:00	T	-0.0157438	0.526039	336.246	685.199	17.7114	13.3879	1.7501
2014-05-05	1899-12-31 18:00:00	T	-0.304011	0.382461	167.929	346.668	17.1404	13.5887	1.68418
2014-05-05	1899-12-31 18:30:00	T	-0.186048	0.433278	129.427	273.744	16.7865	14.1823	1.6355
2014-05-05	1899-12-31 19:00:00	F	-0.175679	0.291141	126.428	284.113	16.7325	14.5729	1.62249
2014-05-05	1899-12-31 19:30:00	F	-0.0772263	0.132655	35.2739	89.7204	16.1749	15.4919	1.54907
2014-05-05	1899-12-31 20:00:00	F	0.0612767	0.055941	-2.15592	12.4431	14.933	17.531	1.39601
2014-05-05	1899-12-31 20:30:00	F	-0.0197142	0.065934	-5.35356	0.136207	14.6131	17.9301	1.36088
2014-05-05	1899-12-31 21:00:00	F	0.031791	0.0492382	-3.2859	-0.00531448	14.7285	17.5881	1.37677
2014-05-05	1899-12-31 21:30:00	F	-0.0754356	0.034793	-2.87912	-0.0113548	14.4948	17.9881	1.34957
2014-05-05	1899-12-31 22:00:00	F	0.0263996	0.069607	-3.37437	-0.0142548	14.1185	18.464	1.30945
2014-05-05	1899-12-31 22:30:00	F	0.0703172	0.066865	-4.83516	-0.00918109	13.8109	18.9242	1.27632
2014-05-05	1899-12-31 23:00:00	F	-0.436105	0.19452	-4.5314	-0.0137717	13.294	19.6986	1.22229
2014-05-05	1899-12-31 23:30:00	F	-0.110793	0.0834769	-2.68062	-0.00652362	13.5062	18.9559	1.25078
2014-05-06	1899-12-31	F	0.124843	0.102845	-3.92842	-0.0128055	13.0289	19.4989	1.20429
2014-05-06	1899-12-31 00:30:00	F	-0.64802	0.158564	-5.72561	-0.0152218	10.468	25.6971	0.938571
2014-05-06	1899-12-31 01:00:00	F	0.0420438	0.18001	-4.27035	-0.0207804	10.3193	26.9621	0.913475
2014-05-06	1899-12-31 01:30:00	F	-0.0784688	0.177604	-4.1897	-0.0350395	10.4607	25.9321	0.935148
2014-05-06	1899-12-31 02:00:00	F	0.0302706	0.197339	-4.18075	-0.0379403	10.5966	25.0944	0.954334
2014-05-06	1899-12-31 02:30:00	F	0.0304113	0.184125	-4.24554	-0.021266	10.6423	24.5874	0.963727
2014-05-06	1899-12-31 03:00:00	F	0.184839	0.211722	-4.22048	-0.025374	11.1466	22.9028	1.01886
2014-05-06	1899-12-31 03:30:00	F	0.133352	0.162628	-4.7713	-0.0132908	11.0896	22.5919	1.01911
2014-05-06	1899-12-31 04:00:00	F	0.118677	0.124149	-4.30268	-0.0128071	11.2864	21.9389	1.04121
2014-05-06	1899-12-31 04:30:00	F	0.222873	0.180461	-4.83677	-0.00724934	11.116	22.6186	1.02054
2014-05-06	1899-12-31 05:00:00	T	0.254989	0.212492	-4.55186	-0.00410794	10.9677	24.6715	0.983727
2014-05-06	1899-12-31 05:30:00	T	0.308653	0.238861	-4.31098	0.025372	10.9831	27.2518	0.950993
2014-05-06	1899-12-31 06:00:00	T	0.282212	0.33314	-1.26425	6.31167	11.2961	27.5886	0.966464
2014-05-06	1899-12-31 06:30:00	T	0.0366702	0.349218	50.1773	72.3282	10.6929	37.7256	0.798487
2014-05-06	1899-12-31 07:00:00	T	-0.230186	0.387572	149.304	231.054	11.1493	49.2549	0.67067
2014-05-06	1899-12-31 07:30:00	T	-0.259402	0.42119	260.1	420.058	12.7405	44.5066	0.814576
2014-05-06	1899-12-31 08:00:00	T	-0.654691	0.55191	375.142	623.431	14.2245	37.3926	1.01231
2014-05-06	1899-12-31 08:30:00	T	-0.59936	0.596296	487.832	827.962	14.9396	32.3785	1.1451
2014-05-06	1899-12-31 09:00:00	T	-0.611622	0.640535	595.081	1025.94	16.0313	27.9697	1.30823
2014-05-06	1899-12-31 09:30:00	T	-0.377914	0.62581	698.616	1220.23	17.6638	20.6604	1.5983
2014-05-06	1899-12-31 10:00:00	T	-0.220251	0.599734	782.933	1385.91	19.032	16.4425	1.83412
2014-05-06	1899-12-31 10:30:00	T	-0.305762	0.636905	862.607	1542.51	19.8919	13.4264	2.00469
2014-05-06	1899-12-31 11:00:00	T	-0.27879	0.637021	923.485	1669.75	20.7224	13.0588	2.11918
2014-05-06	1899-12-31 11:30:00	T	-0.263005	0.683745	967.864	1768.17	21.4741	13.2673	2.21394
2014-05-06	1899-12-31 12:00:00	T	-0.263405	0.727824	998.317	1840.17	22.1452	12.3054	2.33213
2014-05-06	1899-12-31 12:30:00	T	-0.493345	0.591491	1009.39	1877.25	22.2663	11.2727	2.37706
2014-05-06	1899-12-31 13:00:00	T	-0.204133	0.885537	1006.4	1884.08	22.8485	11.0671	2.46829
2014-05-06	1899-12-31 13:30:00	T	0.300077	0.911047	777.911	1464.51	22.7262	10.8053	2.45729
2014-05-06	1899-12-31 14:00:00	T	-0.205068	0.777986	531.733	1001.31	22.1843	11.0886	2.37014
2014-05-06	1899-12-31 14:30:00	T	-0.301309	0.811941	851.501	1602.85	22.8249	10.5854	2.47812
2014-05-06	1899-12-31 15:00:00	T	-0.587145	0.808019	865.739	1634.64	22.9859	9.67301	2.52794
2014-05-06	1899-12-31 15:30:00	T	-0.535181	0.760268	802.888	1513.22	23.2179	9.66045	2.564
2014-05-06	1899-12-31 16:00:00	T	-0.510723	0.823021	676.142	1271.53	23.1669	9.01001	2.57453
2014-05-06	1899-12-31 16:30:00	T	-0.224196	0.837025	435.985	825.643	22.6587	9.61983	2.47977
2014-05-06	1899-12-31 17:00:00	T	0.257214	0.763728	364.331	692.899	22.1716	10.4988	2.38402
2014-05-06	1899-12-31 17:30:00	T	-0.292949	0.783376	216.939	425.684	21.9433	10.7995	2.34318
2014-05-06	1899-12-31 18:00:00	T	-0.212381	0.720596	288.765	569.822	22.2828	10.0869	2.41127
2014-05-06	1899-12-31 18:30:00	T	-0.228749	0.678644	171.082	342.384	22.043	10.4312	2.36722
2014-05-06	1899-12-31 19:00:00	F	0.010402	0.806624	74.0174	143.334	21.3584	12.2016	2.22533
2014-05-06	1899-12-31 19:30:00	F	0.0321433	0.704631	38.0499	76.0764	20.6979	14.0974	2.0907
2014-05-06	1899-12-31 20:00:00	F	0.462121	0.574216	-1.06636	9.22588	19.6676	16.2676	1.91209
2014-05-06	1899-12-31 20:30:00	F	0.466881	0.489933	-4.82422	0.109351	18.6917	18.816	1.74451
2014-05-06	1899-12-31 21:00:00	F	0.304701	0.498339	-4.68592	-0.0564931	17.9305	20.4361	1.62997
2014-05-06	1899-12-31 21:30:00	F	0.270169	0.472896	-5.06339	-0.0393553	16.9992	22.6429	1.49424
2014-05-06	1899-12-31 22:00:00	F	0.321242	0.254549	-5.15276	-0.0424978	15.8384	25.4953	1.33661
2014-05-06	1899-12-31 22:30:00	F	0.293216	0.313675	-4.75953	-0.0354991	15.0137	27.5486	1.23278
2014-05-06	1899-12-31 23:00:00	F	0.0879883	0.135082	-4.4129	-0.027291	14.2797	28.9263	1.15337
2014-05-06	1899-12-31 23:30:00	F	0.391817	0.241009	-3.139	-0.0313997	14.3916	28.2241	1.17324
2014-05-07	1899-12-31	F	0.210614	0.197585	-3.95957	-0.0301937	13.8515	29.7531	1.10873
2014-05-07	1899-12-31 00:30:00	F	0.101944	0.173062	-3.22873	-0.0355093	13.9666	29.633	1.11896
2014-05-07	1899-12-31 01:00:00	F	0.124342	0.135588	-3.30636	-0.0137696	14.03	29.6193	1.12379
2014-05-07	1899-12-31 01:30:00	F	-0.0579831	0.139639	-3.64335	-0.00531469	13.7104	30.4398	1.08787
2014-05-07	1899-12-31 02:00:00	F	-0.0543568	0.0551182	-3.84036	-0.0111129	12.7729	33.1887	0.982846
2014-05-07	1899-12-31 02:30:00	F	0.14773	0.0942578	-2.99637	-0.0135296	13.0496	32.7011	1.00811
2014-05-07	1899-12-31 03:00:00	F	-0.0262381	0.0398458	-1.6893	-0.00507383	13.426	32.1765	1.04124
2014-05-07	1899-12-31 03:30:00	F	-0.0356913	0.0900647	-2.36964	-0.0045908	12.6057	34.7119	0.949965
2014-05-07	1899-12-31 04:00:00	F	-0.160223	0.0323748	-2.77955	-0.00628223	12.2922	35.9222	0.913347
2014-05-07	1899-12-31 04:30:00	F	0.070663	0.0536561	-2.46328	-0.0130477	12.5623	34.6338	0.948396
2014-05-07	1899-12-31 05:00:00	T	0.315687	0.103295	-3.33594	-0.0120811	11.6549	37.3145	0.856734
2014-05-07	1899-12-31 05:30:00	-9999	-9999	-9999	-2.9626	0.0350357		-9999
2014-05-07	1899-12-31 06:00:00	-9999	-9999	-9999	2.57077	7.10029		-9999
2014-05-07	1899-12-31 06:30:00	-9999	-9999	-9999	37.4434	66.8194		-9999
2014-05-07	1899-12-31 07:00:00	-9999	-9999	-9999	127.999	210.877		-9999
2014-05-07	1899-12-31 07:30:00	-9999	-9999	-9999	192.349	339.298		-9999
2014-05-07	1899-12-31 08:00:00	-9999	-9999	-9999	347.406	599.319		-9999
2014-05-07	1899-12-31 08:30:00	-9999	-9999	-9999	399.788	722.435		-9999
2014-05-07	1899-12-31 09:00:00	-9999	-9999	-9999	513.122	938.859		-9999
2014-05-07	1899-12-31 09:30:00	-9999	-9999	-9999	611.551	1121.59		-9999
2014-05-07	1899-12-31 10:00:00	-9999	-9999	-9999	738.877	1367.08		-9999
2014-05-07	1899-12-31 10:30:00	-9999	-9999	-9999	812.062	1513.83		-9999
2014-05-07	1899-12-31 11:00:00	-9999	-9999	-9999	857.624	1610.59		-9999
2014-05-07	1899-12-31 11:30:00	-9999	-9999	-9999	908.978	1724.62		-9999
2014-05-07	1899-12-31 12:00:00	-9999	-9999	-9999	914.675	1747.87		-9999
2014-05-07	1899-12-31 12:30:00	-9999	-9999	-9999	940.201	1811.01		-9999
2014-05-07	1899-12-31 13:00:00	-9999	-9999	-9999	938.808	1817.74		-9999
2014-05-07	1899-12-31 13:30:00	-9999	-9999	-9999	967.952	1885.77		-9999
2014-05-07	1899-12-31 14:00:00	-9999	-9999	-9999	931.808	1816.7		-9999
2014-05-07	1899-12-31 14:30:00	-9999	-9999	-9999	916.839	1787.77		-9999
2014-05-07	1899-12-31 15:00:00	-9999	-9999	-9999	745.498	1453.14		-9999
2014-05-07	1899-12-31 15:30:00	-9999	-9999	-9999	678.26	1332.1		-9999
2014-05-07	1899-12-31 16:00:00	-9999	-9999	-9999	592.622	1172.12		-9999
2014-05-07	1899-12-31 16:30:00	-9999	-9999	-9999	537.351	1069.92		-9999
2014-05-07	1899-12-31 17:00:00	-9999	-9999	-9999	423.426	848.379		-9999
2014-05-07	1899-12-31 17:30:00	-9999	-9999	-9999	314.608	631.179		-9999
2014-05-07	1899-12-31 18:00:00	-9999	-9999	-9999	194.09	394.782		-9999
2014-05-07	1899-12-31 18:30:00	-9999	-9999	-9999	132.94	267.174		-9999
2014-05-07	1899-12-31 19:00:00	-9999	-9999	-9999	98.697	197.263		-9999
2014-05-07	1899-12-31 19:30:00	F	0.0837047	0.335459	31.832	59.503	20.9909	23.7748	1.8888
2014-05-07	1899-12-31 20:00:00	-9999	-9999	-9999	11.444	17.2179		-9999
2014-05-07	1899-12-31 20:30:00	F	0.173276	0.24085	-4.49067	0.172106	19.5557	26.9089	1.65743
2014-05-07	1899-12-31 21:00:00	F	1.83727	0.38583	-5.86177	-0.0750799	18.2088	29.8832	1.4617
2014-05-07	1899-12-31 21:30:00	F	0.549645	0.349937	-4.41396	-0.0663967	17.8353	31.4478	1.39591
2014-05-07	1899-12-31 22:00:00	F	0.403264	0.436669	-4.65644	-0.0625386	17.7401	30.7099	1.4025
2014-05-07	1899-12-31 22:30:00	F	-0.911203	0.330418	-4.93278	-0.0651962	16.8256	32.9182	1.2815
2014-05-07	1899-12-31 23:00:00	F	0.413169	0.280801	-4.93078	-0.058197	15.8548	35.8006	1.15288
2014-05-07	1899-12-31 23:30:00	F	0.0590197	0.112101	-4.01312	-0.0642401	15.5021	36.8339	1.10899
2014-05-08	1899-12-31	F	0.191862	0.108844	-3.0037	-0.0439579	16.0716	34.971	1.18407
2014-05-08	1899-12-31 00:30:00	F	0.795506	0.20525	-3.78458	-0.0410608	15.6838	36.6714	1.12486
2014-05-08	1899-12-31 01:00:00	F	0.174452	0.0848364	-3.49273	-0.0299508	15.3735	37.7678	1.08362
2014-05-08	1899-12-31 01:30:00	F	0.499228	0.310061	-3.08294	-0.0507243	16.657	35.763	1.21407
2014-05-08	1899-12-31 02:00:00	F	0.439577	0.467552	-4.66723	-0.0393694	16.6894	37.0945	1.19134
2014-05-08	1899-12-31 02:30:00	F	0.25766	0.363664	-4.80704	-0.0311548	15.8131	40.2591	1.06992
2014-05-08	1899-12-31 03:00:00	F	0.706002	0.393884	-4.27298	-0.0417812	15.5299	43.1544	0.99976
2014-05-08	1899-12-31 03:30:00	F	0.513007	0.558203	-3.90521	-0.0253588	16.4484	41.2991	1.09477
2014-05-08	1899-12-31 04:00:00	F	0.554685	0.515197	-4.01393	-0.0234256	16.4492	41.4576	1.09188
2014-05-08	1899-12-31 04:30:00	F	0.578329	0.570461	-4.16655	-0.0318773	16.6464	40.2698	1.12809
2014-05-08	1899-12-31 05:00:00	T	0.325232	0.527577	-4.58559	-0.0342917	16.5071	39.8066	1.12682
2014-05-08	1899-12-31 05:30:00	T	0.39185	0.376459	-5.09144	0.0193209	14.4934	47.6456	0.86133
2014-05-08	1899-12-31 06:00:00	T	0.391831	0.498822	-1.2552	5.85175	14.8571	47.1906	0.889451
2014-05-08	1899-12-31 06:30:00	T	0.536946	0.591636	22.9834	50.2364	15.7246	46.2469	0.957213
2014-05-08	1899-12-31 07:00:00	T	-0.0638493	0.54065	95.3315	168.71	15.7176	48.0993	0.923798
2014-05-08	1899-12-31 07:30:00	T	-0.523036	0.513759	220.598	373.552	16.6504	45.6756	1.02621
2014-05-08	1899-12-31 08:00:00	T	-0.954827	0.567029	313.298	543.909	18.2223	38.2092	1.28913
2014-05-08	1899-12-31 08:30:00	T	-0.732749	0.502834	428.694	753.619	19.48	32.7657	1.51739
2014-05-08	1899-12-31 09:00:00	T	-1.89406	0.529267	488.62	874.31	19.9005	34.2851	1.52229
2014-05-08	1899-12-31 09:30:00	T	-0.526494	0.546045	661.947	1183.41	20.1744	36.016	1.5075
2014-05-08	1899-12-31 10:00:00	T	-0.606426	0.621119	717.896	1300.93	20.694	34.6864	1.58897
2014-05-08	1899-12-31 10:30:00	T	-0.624219	0.657642	770.492	1405.5	21.4036	30.2778	1.77184
2014-05-08	1899-12-31 11:00:00	T	-0.620339	0.717205	880.047	1612.77	22.1674	26.8243	1.94845
2014-05-08	1899-12-31 11:30:00	T	-0.512486	0.700571	944.009	1748.55	23.2164	24.5196	2.14184
2014-05-08	1899-12-31 12:00:00	T	-0.393348	0.68787	963.67	1799.16	24.1863	21.9946	2.34658
2014-05-08	1899-12-31 12:30:00	T	-0.555905	0.718129	998.342	1880.71	24.6842	21.2071	2.44194
2014-05-08	1899-12-31 13:00:00	T	-0.482856	0.765777	986.953	1880.64	24.8116	21.9307	2.43798
2014-05-08	1899-12-31 13:30:00	T	-0.545124	0.67495	930.062	1786.3	24.9735	20.4845	2.50726
2014-05-08	1899-12-31 14:00:00	T	-0.918749	0.774548	886.846	1710.71	25.4153	18.485	2.63881
2014-05-08	1899-12-31 14:30:00	T	-0.385985	0.753898	815.107	1571.4	25.8129	16.0301	2.7832
2014-05-08	1899-12-31 15:00:00	T	-0.417904	0.829714	866.336	1675.01	25.7911	15.0744	2.81127
2014-05-08	1899-12-31 15:30:00	T	-0.436195	0.71373	665.185	1294.85	25.5549	17.7257	2.68557
2014-05-08	1899-12-31 16:00:00	T	-0.589278	0.775833	565.852	1108.38	25.2986	19.5351	2.58679
2014-05-08	1899-12-31 16:30:00	T	-0.751807	0.796486	433.127	856.976	25.0885	21.5965	2.48916
2014-05-08	1899-12-31 17:00:00	T	-0.218903	0.801637	479.083	952.96	24.7512	23.2071	2.38945
2014-05-08	1899-12-31 17:30:00	T	-0.202468	0.82261	385.344	789.538	24.3335	26.7498	2.22291
2014-05-08	1899-12-31 18:00:00	T	-0.354272	0.826771	264.226	551.632	23.7933	29.7408	2.06407
2014-05-08	1899-12-31 18:30:00	T	0.176214	0.837997	160.059	340.01	23.3481	31.6521	1.95476
2014-05-08	1899-12-31 19:00:00	F	0.192083	0.760721	86.2963	183.883	22.9478	33.2486	1.86344
2014-05-08	1899-12-31 19:30:00	F	0.518753	0.733637	26.9303	61.4379	22.1922	39.1807	1.62162
2014-05-08	1899-12-31 20:00:00	F	0.73389	0.731265	0.209603	8.55279	21.5919	40.4783	1.52995
2014-05-08	1899-12-31 20:30:00	F	0.759758	0.693681	-3.28461	0.0692692	21.0569	39.828	1.49681
2014-05-08	1899-12-31 21:00:00	F	0.545925	0.686616	-3.13565	-0.0386206	20.4778	40.9225	1.41813
2014-05-08	1899-12-31 21:30:00	F	0.616811	0.667507	-2.88517	-0.0550368	20.1616	44.2618	1.31205
2014-05-08	1899-12-31 22:00:00	F	0.713833	0.6713	-2.59171	-0.0519002	19.9278	46.71	1.23637
2014-05-08	1899-12-31 22:30:00	F	0.624627	0.387716	-2.41027	-0.0509364	19.7762	48.5828	1.18174
2014-05-08	1899-12-31 23:00:00	F	0.582814	0.269731	-2.5037	-0.0487649	19.5039	50.7966	1.11188
2014-05-08	1899-12-31 23:30:00	F	0.350976	0.349208	-3.34795	-0.0424895	19.0307	53.1257	1.02848
2014-05-09	1899-12-31	F	0.279257	0.439963	-3.58993	-0.0436986	18.4806	56.0353	0.932016
2014-05-09	1899-12-31 00:30:00	F	0.260557	0.38329	-3.61342	-0.0490127	17.8783	58.9916	0.837068
2014-05-09	1899-12-31 01:00:00	F	0.40906	0.465142	-3.09622	-0.0451517	17.5807	60.5039	0.791212
2014-05-09	1899-12-31 01:30:00	F	0.725283	0.470999	-3.33615	-0.0458773	17.1604	62.8396	0.724905
2014-05-09	1899-12-31 02:00:00	F	0.527266	0.462775	-3.29853	-0.0516739	16.7801	65.1627	0.66339
2014-05-09	1899-12-31 02:30:00	F	2.21562	0.524487	-3.07353	-0.0405677	16.2368	65.3121	0.638119
2014-05-09	1899-12-31 03:00:00	F	0.877599	0.949376	-1.87698	-0.0255976	12.2244	47.9116	0.739107
2014-05-09	1899-12-31 03:30:00	F	0.383488	0.837401	-1.56486	-0.0405754	10.8854	47.6326	0.680086
2014-05-09	1899-12-31 04:00:00	F	0.670088	0.937733	-1.83207	-0.0316449	10.1425	47.5494	0.648244
2014-05-09	1899-12-31 04:30:00	F	0.649254	1.00734	-1.99524	-0.0340646	9.38014	47.5598	0.615794
2014-05-09	1899-12-31 05:00:00	T	0.588693	0.93605	-2.03411	-0.0251275	8.80869	48.7817	0.578699
2014-05-09	1899-12-31 05:30:00	T	0.478791	0.880864	-2.34272	0.00990773	8.22431	51.8456	0.522949
2014-05-09	1899-12-31 06:00:00	T	0.547256	0.967395	-0.232477	3.82484	7.41069	57.5748	0.435871
2014-05-09	1899-12-31 06:30:00	T	0.554981	1.04035	17.9094	36.1648	6.78111	61.2099	0.381686
2014-05-09	1899-12-31 07:00:00	T	-0.0769941	0.990778	36.0398	70.2235	6.71993	63.0237	0.36231
2014-05-09	1899-12-31 07:30:00	T	-0.886021	1.03483	47.5926	96.6675	6.49849	85.5553	0.139382
2014-05-09	1899-12-31 08:00:00	T	-0.0531538	0.73513	48.5827	100.274	6.16131	96.1666	0.0361383
2014-05-09	1899-12-31 08:30:00	T	-0.616779	0.635671	200.457	378.602	6.45803	90.383	0.0925383
2014-05-09	1899-12-31 09:00:00	T	-0.396959	0.547516	186.88	372.05	5.99274	94.8192	0.0482754
2014-05-09	1899-12-31 09:30:00	T	-0.609838	0.507977	180.948	376.704	5.89856	95.8077	0.0388102
2014-05-09	1899-12-31 10:00:00	T	-0.585443	0.59972	208.894	440.736	6.24712	92.9229	0.0671147
2014-05-09	1899-12-31 10:30:00	T	-0.415486	0.566546	151.962	332.95	6.01563	95.6521	0.0405778
2014-05-09	1899-12-31 11:00:00	T	-0.756363	0.579533	183.068	404.811	5.91482	99.4538	0.00506228
2014-05-09	1899-12-31 11:30:00	T	-0.718288	0.483468	96.315	231.55	5.68262	100	0
2014-05-09	1899-12-31 12:00:00	T	-0.403865	0.514557	212.212	483.882	5.82391	100	0
2014-05-09	1899-12-31 12:30:00	T	-0.496271	0.540983	209.05	476.208	6.08853	100	0
2014-05-09	1899-12-31 13:00:00	T	-0.563186	0.521028	118.054	283.757	5.79364	100	0
2014-05-09	1899-12-31 13:30:00	T	0.535791	0.438544	122.777	284.092	4.79188	100	0
2014-05-09	1899-12-31 14:00:00	T	-0.588907	0.36247	102.264	237.709	3.9853	100	0
2014-05-09	1899-12-31 14:30:00	T	1.35495	0.310524	56.2418	137.952	3.59487	-9999
2014-05-09	1899-12-31 15:00:00	T	1.08217	0.30241	52.2602	131.964	3.00036	-9999
2014-05-09	1899-12-31 15:30:00	T	-1.22358	0.349046	99.9248	222.866	2.45305	-9999
2014-05-09	1899-12-31 16:00:00	T	0.254663	0.32249	156.519	331.051	2.70463	-9999
2014-05-09	1899-12-31 16:30:00	T	0.672063	0.263823	46.2914	105.094	2.63331	-9999
2014-05-09	1899-12-31 17:00:00	T	0.655359	0.249815	32.813	75.2256	2.761	-9999
2014-05-09	1899-12-31 17:30:00	T	0.120302	0.236086	32.7746	74.0809	2.91145	-9999
2014-05-09	1899-12-31 18:00:00	T	1.02556	0.18561	37.7316	81.9514	3.03773	-9999
2014-05-09	1899-12-31 18:30:00	T	0.479864	0.184871	27.1601	58.7038	3.24916	-9999
2014-05-09	1899-12-31 19:00:00	F	0.194795	0.13319	36.0828	72.3038	3.36919	-9999
2014-05-09	1899-12-31 19:30:00	F	0.0324773	0.183981	20.9326	38.159	3.57472	100	0
2014-05-09	1899-12-31 20:00:00	F	0.570612	0.208814	5.7157	8.71707	3.73458	100	0
2014-05-09	1899-12-31 20:30:00	F	0.456283	0.13472	0.282367	0.0701098	3.90781	100	0
2014-05-09	1899-12-31 21:00:00	F	0.559584	0.031494	0.00767726	-0.0379557	3.96352	100	0
2014-05-09	1899-12-31 21:30:00	F	1.20673	0.0676189	0.101645	-0.0452081	4.17061	100	0
2014-05-09	1899-12-31 22:00:00	F	0.786645	0.18455	-0.120375	-0.0316697	4.2593	100	0
2014-05-09	1899-12-31 22:30:00	F	0.258843	0.171787	-0.504223	-0.0449655	4.24546	100	0
2014-05-09	1899-12-31 23:00:00	F	0.646415	0.166672	-0.426991	-0.0386797	4.2959	100	0
2014-05-09	1899-12-31 23:30:00	-9999	-9999	-9999	-0.632885	-0.0413388		-9999
2014-05-10	1899-12-31	F	0.57361	0.0563433	-0.975424	-0.054393	4.27604	100	0
2014-05-10	1899-12-31 00:30:00	F	-1.38263	0.195448	-0.613393	-0.05246	4.08347	-9999
2014-05-10	1899-12-31 01:00:00	F	-0.0137565	0.154918	-0.886694	-0.0439988	3.60213	-9999
2014-05-10	1899-12-31 01:30:00	F	0.420052	0.139224	-0.616014	-0.0568127	3.73918	-9999
2014-05-10	1899-12-31 02:00:00	F	0.586026	0.115358	-0.376642	-0.0611645	4.11557	-9999
2014-05-10	1899-12-31 02:30:00	F	0.111509	0.112974	-0.548913	-0.0452083	4.34527	100	0
2014-05-10	1899-12-31 03:00:00	F	0.533946	0.134535	-0.511904	-0.0454494	4.35322	100	0
2014-05-10	1899-12-31 03:30:00	F	-0.273954	0.173709	-1.63197	-0.0539103	3.96583	-9999
2014-05-10	1899-12-31 04:00:00	F	0.417361	0.0955726	-1.78997	-0.059713	3.79048	-9999
2014-05-10	1899-12-31 04:30:00	F	0.599336	0.124013	-2.63653	-0.0565716	3.55152	-9999
2014-05-10	1899-12-31 05:00:00	T	0.111994	0.0978382	-2.7707	-0.0616512	3.27062	-9999
2014-05-10	1899-12-31 05:30:00	T	0.114352	0.0430157	-1.64031	-0.0123301	3.37305	-9999
2014-05-10	1899-12-31 06:00:00	T	-0.403877	0.0936863	0.53071	3.77931	3.44081	-9999
2014-05-10	1899-12-31 06:30:00	T	0.141809	0.0851425	18.3351	38.6039	3.44287	100	0
2014-05-10	1899-12-31 07:00:00	T	0.0455174	0.125383	55.6531	108.7	3.40145	100	0
2014-05-10	1899-12-31 07:30:00	T	-0.518455	0.132346	106.511	203.632	3.59938	100	0
2014-05-10	1899-12-31 08:00:00	T	-0.307471	0.247147	223.009	397.89	4.26374	100	0
2014-05-10	1899-12-31 08:30:00	T	-1.07138	0.344142	397.111	695.959	5.19864	100	0
2014-05-10	1899-12-31 09:00:00	T	-1.84697	0.36033	521.817	920.584	5.95796	100	0
2014-05-10	1899-12-31 09:30:00	T	1.15131	0.408973	627.553	1125.92	6.46264	96.5765	0.0329521
2014-05-10	1899-12-31 10:00:00	T	-0.29513	0.361939	716.813	1292.01	6.91035	93.4123	0.0653908
2014-05-10	1899-12-31 10:30:00	T	0.543308	0.421446	786.007	1429.19	7.56899	87.9824	0.124793
2014-05-10	1899-12-31 11:00:00	T	0.019219	0.366244	858.155	1573.48	8.27744	84.214	0.172029
2014-05-10	1899-12-31 11:30:00	T	0.18725	0.431758	892.194	1644.1	9.01091	77.0039	0.263366
2014-05-10	1899-12-31 12:00:00	T	0.251098	0.535766	926.274	1724.88	9.58859	67.4865	0.387155
2014-05-10	1899-12-31 12:30:00	T	-0.764623	0.546277	952.603	1781.05	10.3674	58.2431	0.523868
2014-05-10	1899-12-31 13:00:00	T	-1.88507	0.573751	797.174	1515.53	10.7356	49.9756	0.64321
2014-05-10	1899-12-31 13:30:00	T	0.369773	0.614534	917.089	1737.21	11.4874	48.2946	0.698851
2014-05-10	1899-12-31 14:00:00	T	0.0541505	0.622414	820.399	1575.66	12.0078	48.7779	0.716519
2014-05-10	1899-12-31 14:30:00	T	-0.367606	0.636789	734.818	1424.11	12.1242	45.0857	0.774097
2014-05-10	1899-12-31 15:00:00	T	-1.26931	0.727578	385.585	764.464	11.6694	56.4357	0.595919
2014-05-10	1899-12-31 15:30:00	T	-0.507476	0.82413	210.831	432.668	10.1731	67.8309	0.398356
2014-05-10	1899-12-31 16:00:00	T	-0.179696	0.81048	237.465	496.849	9.56143	68.2448	0.377435
2014-05-10	1899-12-31 16:30:00	T	-2.22096	0.819298	332.933	671.285	9.44451	63.8901	0.425843
2014-05-10	1899-12-31 17:00:00	T	0.89967	0.666839	206.422	423.169	9.1423	66.9502	0.381898
2014-05-10	1899-12-31 17:30:00	T	-0.283466	0.54764	136.311	288.591	8.52969	72.965	0.299716
2014-05-10	1899-12-31 18:00:00	T	0.0801003	0.507519	99.3603	208.59	8.21847	73.2193	0.290694
2014-05-10	1899-12-31 18:30:00	T	-0.0812783	0.471833	66.2141	140.133	7.86608	81.3073	0.198089
2014-05-10	1899-12-31 19:00:00	F	0.139698	0.496518	49.5699	103.012	7.58371	79.961	0.208307
2014-05-10	1899-12-31 19:30:00	F	0.307269	0.485991	27.1523	53.4363	7.10771	79.6679	0.204584
2014-05-10	1899-12-31 20:00:00	F	1.08205	0.416127	3.09728	10.6363	6.55246	87.7611	0.118536
2014-05-10	1899-12-31 20:30:00	F	-0.263001	0.328986	-3.14823	0.336177	5.97526	100	0
2014-05-10	1899-12-31 21:00:00	F	0.259472	0.34374	-2.94535	-0.00966806	5.80365	100	0
2014-05-10	1899-12-31 21:30:00	F	-0.256116	0.296365	-2.74348	-0.00555941	5.77141	100	0
2014-05-10	1899-12-31 22:00:00	F	-0.227525	0.278192	-1.72756	-0.00918539	5.87356	100	0
2014-05-10	1899-12-31 22:30:00	F	0.315312	0.310363	-1.94633	-0.0074933	5.84492	100	0
2014-05-10	1899-12-31 23:00:00	F	-1.08527	0.399154	-4.27847	-0.00797679	5.04344	100	0
2014-05-10	1899-12-31 23:30:00	F	0.0479725	0.317471	-4.50441	-0.0157127	4.15138	100	0
2014-05-11	1899-12-31	F	0.30339	0.234346	-4.42127	-0.0326368	3.48409	100	0
2014-05-11	1899-12-31 00:30:00	F	-0.358629	0.268789	-3.7807	-0.0178912	3.40671	100	0
2014-05-11	1899-12-31 01:00:00	F	0.184773	0.369668	-3.83452	-0.00290143	3.42774	100	0
2014-05-11	1899-12-31 01:30:00	F	0.223627	0.471014	-3.67777	-0.00797902	3.54627	100	0
2014-05-11	1899-12-31 02:00:00	F	0.142339	0.451894	-3.85726	-0.0176504	3.59117	100	0
2014-05-11	1899-12-31 02:30:00	F	0.394039	0.453392	-4.07376	-0.019343	3.40386	100	0
2014-05-11	1899-12-31 03:00:00	F	0.162311	0.487539	-4.13893	-0.0311909	2.95242	100	0
2014-05-11	1899-12-31 03:30:00	F	0.267952	0.547243	-3.89543	-0.0386873	2.82118	100	0
2014-05-11	1899-12-31 04:00:00	F	0.375239	0.4767	-4.02421	-0.0374789	2.73966	100	0
2014-05-11	1899-12-31 04:30:00	F	0.225306	0.506094	-3.94582	-0.0227293	2.51032	100	0
2014-05-11	1899-12-31 05:00:00	T	0.0863778	0.434702	-3.93868	-0.0193447	2.13074	100	0
2014-05-11	1899-12-31 05:30:00	T	0.218612	0.413689	-3.68996	0.0930993	2.2086	100	0
2014-05-11	1899-12-31 06:00:00	T	-0.0757678	0.44471	1.31149	10.102	2.13971	100	0
2014-05-11	1899-12-31 06:30:00	T	0.0392764	0.502219	42.3605	75.4033	2.68197	100	0
2014-05-11	1899-12-31 07:00:00	T	-0.0601896	0.487129	130.457	217.846	3.61871	100	0
2014-05-11	1899-12-31 07:30:00	T	-0.754045	0.547336	242.946	407.619	4.8713	94.4658	0.0477034
2014-05-11	1899-12-31 08:00:00	T	-0.695015	0.623074	355.36	606.384	6.37051	83.8075	0.154877
2014-05-11	1899-12-31 08:30:00	T	-0.805077	0.622239	466.25	807.647	7.56577	77.1233	0.237517
2014-05-11	1899-12-31 09:00:00	T	-0.902229	0.622823	578.064	1013.97	8.48547	72.6935	0.301821
2014-05-11	1899-12-31 09:30:00	T	-1.1334	0.528033	680.859	1209.35	9.81001	66.9366	0.399598
2014-05-11	1899-12-31 10:00:00	T	-0.131759	0.526261	776.017	1390.63	10.9206	59.9427	0.521406
2014-05-11	1899-12-31 10:30:00	T	-0.784288	0.560383	854.823	1545.52	12.012	53.3392	0.65288
2014-05-11	1899-12-31 11:00:00	T	-0.13588	0.463156	916.463	1672.47	12.8743	43.4183	0.837868
2014-05-11	1899-12-31 11:30:00	T	-0.519309	0.626593	967.182	1778.28	13.6958	38.9698	0.953522
2014-05-11	1899-12-31 12:00:00	T	-0.959256	0.617076	997.934	1848.58	14.3248	36.6384	1.03119
2014-05-11	1899-12-31 12:30:00	T	-0.770958	0.522273	1020.21	1902.86	14.36	34.7478	1.06439
2014-05-11	1899-12-31 13:00:00	T	-0.22973	0.635619	1024.44	1924.82	14.8439	32.6055	1.13424
2014-05-11	1899-12-31 13:30:00	T	-0.00959089	0.48097	1014.65	1918.89	14.9945	30.9697	1.1731
2014-05-11	1899-12-31 14:00:00	T	-0.0849622	0.608699	982.212	1873.08	15.7912	29.1124	1.26787
2014-05-11	1899-12-31 14:30:00	T	0.0983584	0.709614	943.818	1810.66	16.0384	27.4925	1.31751
2014-05-11	1899-12-31 15:00:00	T	-0.408096	0.510103	884.677	1710.63	16.0825	27.1383	1.32768
2014-05-11	1899-12-31 15:30:00	T	-0.230823	0.58745	819.138	1595.17	16.4762	26.6397	1.37073
2014-05-11	1899-12-31 16:00:00	T	-0.278841	0.54061	732.714	1441.76	16.5122	26.7283	1.3722
2014-05-11	1899-12-31 16:30:00	T	-0.579314	0.527534	630.258	1256.94	16.6172	27.4122	1.3685
2014-05-11	1899-12-31 17:00:00	T	-0.941935	0.616435	526.164	1063.76	16.5831	29.218	1.33156
2014-05-11	1899-12-31 17:30:00	T	-0.862809	0.463374	409.033	846.694	16.545	29.6249	1.32069
2014-05-11	1899-12-31 18:00:00	T	-0.873957	0.445204	311.848	662.59	16.6262	28.4812	1.34911
2014-05-11	1899-12-31 18:30:00	T	-1.16267	0.38497	216.468	480.88	16.4824	26.4901	1.37406
2014-05-11	1899-12-31 19:00:00	F	-0.342312	0.407207	123.81	288.516	16.4416	25.2307	1.39399
2014-05-11	1899-12-31 19:30:00	F	-0.0978101	0.294885	42.7367	88.0841	15.7368	25.6375	1.32542
2014-05-11	1899-12-31 20:00:00	F	0.445785	0.179718	1.26	19.1231	14.4129	30.0253	1.14536
2014-05-11	1899-12-31 20:30:00	F	0.297146	0.178942	-5.83115	0.566113	13.8282	31.598	1.07797
2014-05-11	1899-12-31 21:00:00	F	0.158963	0.116112	-6.17039	-0.030195	13.4644	32.6081	1.0372
2014-05-11	1899-12-31 21:30:00	F	0.0820506	0.171474	-5.13544	-0.0425189	13.5886	31.7477	1.05898
2014-05-11	1899-12-31 22:00:00	F	-0.381696	0.0908986	-2.9495	-0.0432479	13.8316	31.037	1.08706
2014-05-11	1899-12-31 22:30:00	F	0.0596759	0.0528148	-3.14722	-0.031411	14.1634	29.6412	1.1332
2014-05-11	1899-12-31 23:00:00	F	0.0221138	0.0407748	-3.13576	-0.0277872	13.8535	30.276	1.10062
2014-05-11	1899-12-31 23:30:00	F	-0.0059981	0.0225559	-1.67026	-0.0367283	14.1903	29.1142	1.14368
2014-05-12	1899-12-31	F	-0.0646644	0.0324061	-2.1468	-0.00942382	13.9232	29.7402	1.11411
2014-05-12	1899-12-31 00:30:00	F	0.00135982	0.0263056	-1.96771	-0.0125651	13.7919	30.0606	1.09961
2014-05-12	1899-12-31 01:00:00	F	0.0191625	0.0541455	-1.94519	-0.0181229	13.5969	30.4345	1.07994
2014-05-12	1899-12-31 01:30:00	F	0.372939	0.144472	-1.57828	-0.0137736	13.9092	29.857	1.11125
2014-05-12	1899-12-31 02:00:00	F	0.120289	0.0341012	-3.21676	-0.00942418	12.7699	32.8991	0.98691
2014-05-12	1899-12-31 02:30:00	F	0.0708516	0.0497491	-3.63441	-0.00652457	12.1815	34.5384	0.926307
2014-05-12	1899-12-31 03:00:00	F	0.102434	0.0575408	-3.52612	-0.00821624	11.9504	34.7863	0.908854
2014-05-12	1899-12-31 03:30:00	F	0.105245	0.0411975	-3.19544	-0.0103913	12.1648	34.2263	0.929699
2014-05-12	1899-12-31 04:00:00	F	-0.0071302	0.046513	-3.18826	-0.00773312	12.2177	34.2364	0.9328
2014-05-12	1899-12-31 04:30:00	F	0.132946	0.112678	-3.43384	-0.00700817	11.669	35.4616	0.882884
2014-05-12	1899-12-31 05:00:00	T	0.0208247	0.100937	-3.46043	-0.0065249	11.8044	33.0046	0.924739
2014-05-12	1899-12-31 05:30:00	T	-0.0094271	0.105531	-3.27643	0.140893	11.5002	33.4646	0.900106
2014-05-12	1899-12-31 06:00:00	T	0.0986974	0.158011	4.87693	12.4744	10.1368	38.1652	0.763956
2014-05-12	1899-12-31 06:30:00	T	-0.0244827	0.212191	51.3103	85.7917	10.2218	40.5138	0.739123
2014-05-12	1899-12-31 07:00:00	T	-0.362624	0.265618	148.627	243.52	11.3486	44.6026	0.741913
2014-05-12	1899-12-31 07:30:00	T	-0.404841	0.302342	259.284	433.542	12.5033	46.3935	0.774726
2014-05-12	1899-12-31 08:00:00	T	-0.805605	0.38274	373.25	637.523	13.1667	45.5461	0.821911
2014-05-12	1899-12-31 08:30:00	T	-0.672263	0.446449	484.517	843.26	13.8836	44.6305	0.875675
2014-05-12	1899-12-31 09:00:00	T	-0.708097	0.465141	590.084	1043.12	14.905	44.4235	0.938964
2014-05-12	1899-12-31 09:30:00	T	-0.539307	0.481411	689.065	1231.78	15.8536	38.8731	1.0976
2014-05-12	1899-12-31 10:00:00	T	-0.496292	0.430465	775.036	1400.63	16.2463	39.8884	1.10676
2014-05-12	1899-12-31 10:30:00	T	-0.569513	0.409193	849.065	1550.7	17.1744	36.7263	1.23573
2014-05-12	1899-12-31 11:00:00	T	-0.653459	0.389895	913.375	1682.51	18.1408	34.1553	1.36675
2014-05-12	1899-12-31 11:30:00	T	-0.561414	0.263517	955.534	1779.21	18.9227	30.2154	1.52125
2014-05-12	1899-12-31 12:00:00	T	-0.5509	0.306249	992.72	1861.73	19.3743	25.8428	1.66277
2014-05-12	1899-12-31 12:30:00	T	-0.40146	0.193247	1004.76	1905.41	20.0039	24.5742	1.75861
2014-05-12	1899-12-31 13:00:00	T	-0.382774	0.242157	1011.3	1928.77	21.0336	20.552	1.97387
2014-05-12	1899-12-31 13:30:00	T	-0.397978	0.29371	1003.66	1924	21.5752	17.6537	2.11498
2014-05-12	1899-12-31 14:00:00	T	-0.616802	0.382944	973.198	1883.29	21.9953	18.2971	2.15297
2014-05-12	1899-12-31 14:30:00	T	-0.576739	0.464114	927.06	1810.96	22.3878	18.2331	2.20675
2014-05-12	1899-12-31 15:00:00	T	-0.320263	0.357546	867.051	1708.13	22.5253	19.7859	2.18298
2014-05-12	1899-12-31 15:30:00	T	-0.586109	0.27331	794.087	1581.61	22.5308	22.9941	2.09631
2014-05-12	1899-12-31 16:00:00	T	-0.698783	0.386497	708.285	1431.95	22.8524	25.6049	2.06506
2014-05-12	1899-12-31 16:30:00	T	-0.531683	0.348315	595.861	1221.6	22.8204	27.1493	2.01825
2014-05-12	1899-12-31 17:00:00	T	-0.591601	0.411491	444.395	921.1	22.481	31.3008	1.86437
2014-05-12	1899-12-31 17:30:00	T	0.322926	0.426424	330.856	694.298	22.164	35.6635	1.71256
2014-05-12	1899-12-31 18:00:00	T	-0.15294	0.386506	246.051	512.382	21.655	38.764	1.58014
2014-05-12	1899-12-31 18:30:00	T	0.0368658	0.374869	134.343	279.846	21.1602	40.8168	1.48156
2014-05-12	1899-12-31 19:00:00	F	-0.0223844	0.381749	99.3257	205.618	20.7958	42.6529	1.40378
2014-05-12	1899-12-31 19:30:00	F	0.184439	0.337431	43.852	92.0753	20.203	44.5426	1.30878
2014-05-12	1899-12-31 20:00:00	F	0.140629	0.401263	5.58015	20.3085	19.0624	48.8301	1.12502
2014-05-12	1899-12-31 20:30:00	F	0.641128	0.532125	-3.99897	0.534486	17.717	54.8109	0.913136
2014-05-12	1899-12-31 21:00:00	F	0.568706	0.387022	-4.30411	-0.0552914	16.7404	58.3382	0.791417
2014-05-12	1899-12-31 21:30:00	F	0.344336	0.451847	-3.84544	-0.0523989	16.2641	60.7946	0.72252
2014-05-12	1899-12-31 22:00:00	F	0.475288	0.486655	-3.79389	-0.0446753	15.8369	63.0499	0.662626
2014-05-12	1899-12-31 22:30:00	F	0.515695	0.429012	-3.56343	-0.0415379	15.3477	65.6642	0.596739
2014-05-12	1899-12-31 23:00:00	F	0.457425	0.432821	-3.42846	-0.0400906	15.0807	67.1787	0.56071
2014-05-12	1899-12-31 23:30:00	F	0.42047	0.313758	-3.27567	-0.0229443	14.7201	69.6673	0.50629
2014-05-13	1899-12-31	F	0.431759	0.234535	-2.84918	-0.0190806	14.3042	72.1865	0.451925
2014-05-13	1899-12-31 00:30:00	F	0.397575	0.210373	-2.33512	-0.0299501	14.2616	73.3774	0.431379
2014-05-13	1899-12-31 01:00:00	F	0.373877	0.164405	-2.13269	-0.0248783	14.4394	74.0019	0.426128
2014-05-13	1899-12-31 01:30:00	F	-0.0243824	0.0866858	-2.13085	-0.00724608	14.2878	75.1345	0.403585
2014-05-13	1899-12-31 02:00:00	F	0.147483	0.0892833	-1.62052	-0.00652167	13.7735	77.998	0.345388
2014-05-13	1899-12-31 02:30:00	F	0.51237	0.157669	-1.64834	-0.0185995	13.587	79.3353	0.320482
2014-05-13	1899-12-31 03:00:00	F	0.325895	0.207293	-1.85639	-0.00748811	13.6816	78.4055	0.336973
2014-05-13	1899-12-31 03:30:00	F	0.394928	0.198575	-1.95655	-0.00410637	13.4416	79.4894	0.315095
2014-05-13	1899-12-31 04:00:00	F	0.447354	0.173009	-1.60004	-0.0101452	13.4436	79.6469	0.312716
2014-05-13	1899-12-31 04:30:00	F	0.521368	0.105538	-2.09266	-0.00410645	13.3658	80.3695	0.300085
2014-05-13	1899-12-31 05:00:00	T	0.750137	0.165033	-1.80549	-0.00676363	13.9264	77.3605	0.358944
2014-05-13	1899-12-31 05:30:00	T	0.265436	0.196123	-3.13809	0.103874	12.8598	83.5337	0.243529
2014-05-13	1899-12-31 06:00:00	T	0.438744	0.350455	0.487426	7.06452	13.1267	79.6388	0.306443
2014-05-13	1899-12-31 06:30:00	T	0.14942	0.497973	23.2999	49.1671	12.9552	45.35	0.813549
2014-05-13	1899-12-31 07:00:00	T	-0.103325	0.492595	64.2996	128.404	12.6753	36.7937	0.923871
2014-05-13	1899-12-31 07:30:00	T	-0.778631	0.5405	120.24	233.762	13.1259	34.7354	0.982517
2014-05-13	1899-12-31 08:00:00	T	-0.760168	0.559434	171.561	338.727	13.6939	33.1164	1.04487
2014-05-13	1899-12-31 08:30:00	T	-1.18353	0.563843	277.303	535.502	14.1356	33.2711	1.07278
2014-05-13	1899-12-31 09:00:00	T	-1.57534	0.511382	306.302	596.805	14.3921	33.2419	1.09122
2014-05-13	1899-12-31 09:30:00	T	-1.73954	0.486778	403.819	773.665	14.8934	33.0438	1.13046
2014-05-13	1899-12-31 10:00:00	T	-0.912147	0.520211	448.199	851.061	14.8415	34.5766	1.10088
2014-05-13	1899-12-31 10:30:00	T	-1.29732	0.614018	568.293	1086.78	15.4862	36.3941	1.11558
2014-05-13	1899-12-31 11:00:00	T	-1.37257	0.65971	671.967	1280.78	15.6209	37.5481	1.10483
2014-05-13	1899-12-31 11:30:00	T	-1.38324	0.616338	949.301	1774.04	15.8204	37.4594	1.12062
2014-05-13	1899-12-31 12:00:00	T	-0.983796	0.629923	943.209	1773.58	16.0474	34.9699	1.18226
2014-05-13	1899-12-31 12:30:00	T	-0.377315	0.640143	976.584	1850.22	16.9162	32.9535	1.28821
2014-05-13	1899-12-31 13:00:00	T	-0.936389	0.638643	972.108	1857.42	17.3039	31.7216	1.34449
2014-05-13	1899-12-31 13:30:00	T	-0.645068	0.616913	984.475	1891.89	17.9804	29.3024	1.45281
2014-05-13	1899-12-31 14:00:00	T	-1.02769	0.685835	951.764	1843.92	18.3226	27.9687	1.51239
2014-05-13	1899-12-31 14:30:00	T	-0.917311	0.71704	818.89	1611.46	18.5751	27.3033	1.55071
2014-05-13	1899-12-31 15:00:00	T	-0.874106	0.632736	878.611	1727.7	18.5448	27.3585	1.54659
2014-05-13	1899-12-31 15:30:00	T	-1.17031	0.630843	809.969	1599.31	18.7559	26.4014	1.58781
2014-05-13	1899-12-31 16:00:00	T	-1.08864	0.644833	700.415	1394.33	18.777	26.0743	1.59698
2014-05-13	1899-12-31 16:30:00	T	-0.756915	0.570307	540.736	1096.85	18.7089	25.9516	1.59284
2014-05-13	1899-12-31 17:00:00	T	-0.932224	0.601962	374.8	782.506	18.3441	26.26	1.55037
2014-05-13	1899-12-31 17:30:00	T	-0.958566	0.637668	386.732	796.742	18.1561	26.5231	1.52672
2014-05-13	1899-12-31 18:00:00	T	-0.370607	0.519736	235.431	494.806	17.7003	27.2642	1.46859
2014-05-13	1899-12-31 18:30:00	T	-0.431202	0.606825	212.131	443.049	17.2802	27.9002	1.41765
2014-05-13	1899-12-31 19:00:00	F	-0.356385	0.59262	113.894	244.522	16.7063	28.7389	1.35111
2014-05-13	1899-12-31 19:30:00	F	0.0922038	0.618566	44.6993	95.2616	15.8803	30.0537	1.25817
2014-05-13	1899-12-31 20:00:00	F	0.4147	0.523553	4.83346	21.2644	15.0335	31.807	1.16178
2014-05-13	1899-12-31 20:30:00	F	0.470761	0.470418	-4.98756	0.624521	14.0806	33.8449	1.05977
2014-05-13	1899-12-31 21:00:00	F	0.569795	0.593903	-4.9499	-0.0132844	13.2862	34.7983	0.991893
2014-05-13	1899-12-31 21:30:00	F	0.354211	0.602454	-4.72666	-0.0103869	12.4883	36.2873	0.919921
2014-05-13	1899-12-31 22:00:00	F	0.675023	0.585704	-4.57683	-0.00700557	11.6751	38.7971	0.837582
2014-05-13	1899-12-31 22:30:00	F	0.505862	0.57485	-3.49534	-0.00748925	10.9713	40.1988	0.781105
2014-05-13	1899-12-31 23:00:00	F	0.494811	0.591928	-2.92828	-0.00483205	10.5347	36.946	0.800002
2014-05-13	1899-12-31 23:30:00	F	0.470055	0.567086	-3.05331	-0.00338257	9.99421	36.6165	0.775656
2014-05-14	1899-12-31	F	0.447311	0.587903	-2.83079	-0.0041076	9.74073	36.8577	0.759683
2014-05-14	1899-12-31 00:30:00	F	0.398197	0.595077	-3.57103	-0.00604083	9.21302	38.409	0.715178
2014-05-14	1899-12-31 01:00:00	-9999	-9999	-9999	-3.50433	-0.00555779		-9999
2014-05-14	1899-12-31 01:30:00	F	0.348768	0.586238	-2.86295	-0.0183657	8.07303	42.2765	0.620474
2014-05-14	1899-12-31 02:00:00	F	0.458944	0.531769	-2.43917	-0.0299664	7.84382	42.4972	0.60853
2014-05-14	1899-12-31 02:30:00	F	0.278027	0.393712	-3.03814	-0.0282758	7.44547	43.7045	0.579773
2014-05-14	1899-12-31 03:00:00	F	0.269105	0.288046	-3.38809	-0.0348026	6.92508	45.337	0.543243
2014-05-14	1899-12-31 03:30:00	F	0.26746	0.277534	-2.28429	-0.0362543	6.7859	45.5627	0.535853
2014-05-14	1899-12-31 04:00:00	F	0.396154	0.323089	-1.4809	-0.0229618	6.86353	44.9436	0.544846
2014-05-14	1899-12-31 04:30:00	F	0.475864	0.361402	-1.29561	-0.0256204	7.12213	44.68	0.557255
2014-05-14	1899-12-31 05:00:00	T	0.449448	0.535484	-1.12765	-0.0210277	7.63304	60.5011	0.412014
2014-05-14	1899-12-31 05:30:00	T	0.558478	0.715801	-1.27343	0.0389105	8.09498	65.8586	0.367507
2014-05-14	1899-12-31 06:00:00	T	0.375383	0.738594	0.444029	3.8523	7.95551	67.8666	0.342623
2014-05-14	1899-12-31 06:30:00	T	-0.0675401	0.515076	15.0945	33.1546	8.04191	66.5938	0.358296
2014-05-14	1899-12-31 07:00:00	T	-0.29028	0.534033	38.546	81.8553	8.16187	63.7586	0.391893
2014-05-14	1899-12-31 07:30:00	-9999	-9999	-9999	77.5008	161.665		-9999
2014-05-14	1899-12-31 08:00:00	T	-0.286303	0.562919	117.885	243.983	7.9924	62.9537	0.396008
2014-05-14	1899-12-31 08:30:00	T	-0.551158	0.363418	180.612	366.933	8.20831	61.6344	0.416178
2014-05-14	1899-12-31 09:00:00	T	-0.754155	0.495563	216.231	432.322	8.51835	61.4384	0.427197
2014-05-14	1899-12-31 09:30:00	T	-1.19777	0.468243	329.491	651.614	9.14709	62.8972	0.428878
2014-05-14	1899-12-31 10:00:00	T	14.6488	0.503887	333.891	665.865	9.43918	55.211	0.528026
2014-05-14	1899-12-31 10:30:00	T	-1.80583	0.43393	235.377	489.957	9.68378	36.0869	0.766024
2014-05-14	1899-12-31 11:00:00	T	-0.818421	0.501372	286.202	585.839	9.41495	41.2878	0.691077
2014-05-14	1899-12-31 11:30:00	T	0.326348	0.398797	362.603	735.965	9.52272	42.8727	0.677311
2014-05-14	1899-12-31 12:00:00	T	-1.22893	0.443912	453.64	919.917	9.81089	43.4544	0.683512
2014-05-14	1899-12-31 12:30:00	T	-1.14527	0.467656	534.876	1072.12	10.557	41.1099	0.748274
2014-05-14	1899-12-31 13:00:00	T	-1.71805	0.55338	532.771	1058.21	10.9312	39.6421	0.786278
2014-05-14	1899-12-31 13:30:00	T	-2.47539	0.484582	591.817	1166.92	11.5879	36.0488	0.870175
2014-05-14	1899-12-31 14:00:00	T	-0.493074	0.503506	568.772	1122.1	12.0061	34.0515	0.92248
2014-05-14	1899-12-31 14:30:00	T	-1.08357	0.543894	712.878	1400.04	12.6038	31.4578	0.997203
2014-05-14	1899-12-31 15:00:00	T	-1.24859	0.53499	671.316	1324.53	13.0891	29.9726	1.05171
2014-05-14	1899-12-31 15:30:00	T	-1.50266	0.630439	484.836	959.212	13.2728	30.0588	1.06309
2014-05-14	1899-12-31 16:00:00	T	-0.876099	0.55674	440.841	882.627	13.1506	28.4706	1.0786
2014-05-14	1899-12-31 16:30:00	T	-1.06692	0.607639	492.096	982.164	13.4181	26.9585	1.12079
2014-05-14	1899-12-31 17:00:00	T	-0.962971	0.569292	375.142	757.136	13.4211	26.4622	1.12863
2014-05-14	1899-12-31 17:30:00	T	-1.03091	0.563925	290.071	590.978	13.4408	25.6065	1.14324
2014-05-14	1899-12-31 18:00:00	T	-1.10562	0.55751	341.211	709.458	13.582	25.1066	1.16155
2014-05-14	1899-12-31 18:30:00	T	-0.606667	0.476327	224.875	487.989	13.4555	23.3131	1.17962
2014-05-14	1899-12-31 19:00:00	F	-0.476068	0.390042	130.142	284.166	13.1767	23.0117	1.16291
2014-05-14	1899-12-31 19:30:00	F	-0.135393	0.362616	51.4258	92.7759	12.8167	22.7835	1.13922
2014-05-14	1899-12-31 20:00:00	F	-0.00274846	0.202503	4.66887	23.4696	11.8895	23.6687	1.05957
2014-05-14	1899-12-31 20:30:00	F	-0.117649	0.1413	-5.56681	0.81145	10.6398	26.9178	0.933788
2014-05-14	1899-12-31 21:00:00	F	0.0411989	0.0886833	-4.67989	-0.00555741	10.1417	28.2538	0.886728
2014-05-14	1899-12-31 21:30:00	F	-0.147136	0.0857078	-3.81401	-0.00966606	10.4766	27.9202	0.911008
2014-05-14	1899-12-31 22:00:00	F	0.0451101	0.0559685	-3.92122	-0.00845838	10.5193	27.4479	0.919593
2014-05-14	1899-12-31 22:30:00	F	-0.225129	0.0491883	-3.79474	-0.00797537	9.35599	29.9002	0.821873
2014-05-14	1899-12-31 23:00:00	F	0.180471	0.19126	-3.4404	-0.010151	9.47188	28.7026	0.842461
2014-05-14	1899-12-31 23:30:00	F	0.243842	0.228319	-4.10403	-0.0079759	9.00904	28.0841	0.823676
2014-05-15	1899-12-31	F	0.197977	0.256861	-4.12211	-0.0183686	8.72196	28.3356	0.805022
2014-05-15	1899-12-31 00:30:00	F	0.202661	0.405943	-3.78929	-0.00797579	9.08063	26.3919	0.847143
2014-05-15	1899-12-31 01:00:00	F	0.17251	0.308881	-4.38138	-0.00531707	8.24141	27.217	0.791381
2014-05-15	1899-12-31 01:30:00	F	0.314395	0.342893	-4.08088	-0.00749228	8.10483	27.1892	0.784368
2014-05-15	1899-12-31 02:00:00	F	0.145914	0.344681	-4.06333	-0.0135348	7.79661	27.8036	0.761597
2014-05-15	1899-12-31 02:30:00	F	0.235743	0.354081	-4.12546	-0.0164355	7.71425	27.8407	0.756942
2014-05-15	1899-12-31 03:00:00	F	0.207426	0.342093	-4.20475	-0.0219949	7.23245	28.9016	0.721652
2014-05-15	1899-12-31 03:30:00	F	0.187659	0.329576	-4.00531	-0.0188534	6.99765	29.4636	0.704516
2014-05-15	1899-12-31 04:00:00	F	0.263447	0.342898	-4.16252	-0.0282811	6.74422	29.9995	0.687098
2014-05-15	1899-12-31 04:30:00	F	0.287002	0.355846	-3.91115	-0.0309407	6.88282	29.325	0.700358
2014-05-15	1899-12-31 05:00:00	T	0.0750227	0.319337	-4.22192	-0.0164374	6.5647	29.91	0.679532
2014-05-15	1899-12-31 05:30:00	T	0.185004	0.309209	-4.24733	0.243669	5.36043	33.3229	0.59476
2014-05-15	1899-12-31 06:00:00	T	0.274366	0.30184	4.4154	14.5413	5.11409	33.9569	0.57909
2014-05-15	1899-12-31 06:30:00	T	-0.263043	0.406872	58.535	98.0801	6.04075	31.7986	0.637742
2014-05-15	1899-12-31 07:00:00	T	-0.318653	0.343662	150.885	250.736	7.12922	30.0048	0.705447
2014-05-15	1899-12-31 07:30:00	T	-0.638273	0.446935	253.875	422.909	8.66735	27.0136	0.81685
2014-05-15	1899-12-31 08:00:00	T	-0.785753	0.51983	394.179	662.605	10.0888	24.7254	0.927054
2014-05-15	1899-12-31 08:30:00	T	-0.977937	0.599078	514.396	878.353	11.8057	21.5009	1.08365
2014-05-15	1899-12-31 09:00:00	T	-1.02339	0.664051	615.912	1067.92	12.826	20.6832	1.17092
2014-05-15	1899-12-31 09:30:00	T	-1.06502	0.679934	691.783	1217.95	13.9668	19.3415	1.28267
2014-05-15	1899-12-31 10:00:00	T	-1.45299	0.70382	790.467	1407.73	14.9797	17.239	1.40518
2014-05-15	1899-12-31 10:30:00	T	-1.11591	0.712071	804.989	1452.63	15.6415	15.3006	1.50053
2014-05-15	1899-12-31 11:00:00	T	-1.2336	0.587085	847.751	1548.74	16.3562	13.2799	1.6081
2014-05-15	1899-12-31 11:30:00	T	-1.09498	0.540833	877.124	1621.65	16.9337	12.488	1.68345
2014-05-15	1899-12-31 12:00:00	T	-1.27201	0.523299	930.072	1737.34	17.7072	11.4361	1.78907
2014-05-15	1899-12-31 12:30:00	T	-1.03588	0.548517	989.816	1866.28	18.1579	10.9062	1.85154
2014-05-15	1899-12-31 13:00:00	T	-1.68842	0.539719	872.832	1663.9	18.5558	10.4426	1.90821
2014-05-15	1899-12-31 13:30:00	T	-1.63041	0.650649	855.745	1636.6	19.081	10.451	1.97169
2014-05-15	1899-12-31 14:00:00	T	-1.76576	0.547987	796.913	1533.8	19.4362	9.97155	2.02658
2014-05-15	1899-12-31 14:30:00	T	-1.00424	0.47349	912.399	1762.89	19.4077	9.87174	2.02522
2014-05-15	1899-12-31 15:00:00	T	-1.19431	0.511266	830.842	1617.53	19.7442	9.27574	2.08168
2014-05-15	1899-12-31 15:30:00	T	-1.30085	0.557597	770.122	1512.22	19.9539	9.84554	2.09568
2014-05-15	1899-12-31 16:00:00	T	-1.33588	0.67176	732.078	1446.11	20.3023	9.89415	2.14017
2014-05-15	1899-12-31 16:30:00	T	-0.88646	0.478217	605.957	1213.45	20.4334	9.85164	2.15858
2014-05-15	1899-12-31 17:00:00	T	-0.997164	0.471946	549.174	1111.4	20.2239	9.55742	2.13779
2014-05-15	1899-12-31 17:30:00	T	-0.810807	0.288357	428.902	888.296	19.9372	9.25903	2.10713
2014-05-15	1899-12-31 18:00:00	T	-0.511828	0.341153	332.249	707.485	19.9083	8.73416	2.11553
2014-05-15	1899-12-31 18:30:00	T	-0.856059	0.375506	230.552	503.026	19.6826	8.43408	2.09299
2014-05-15	1899-12-31 19:00:00	F	-0.716137	0.31493	117.527	258.86	19.302	8.83626	2.03508
2014-05-15	1899-12-31 19:30:00	F	-0.0568038	0.225536	42.1955	92.6412	18.5092	9.56014	1.9214
2014-05-15	1899-12-31 20:00:00	F	0.0500501	0.137055	4.34804	23.7949	17.2385	10.8257	1.74887
2014-05-15	1899-12-31 20:30:00	F	0.118149	0.102015	-5.04035	0.848762	16.5651	11.2872	1.66708
2014-05-15	1899-12-31 21:00:00	F	0.19873	0.0551394	-4.11989	-0.0149739	16.6487	10.9065	1.68315
2014-05-15	1899-12-31 21:30:00	F	0.100983	0.0615313	-3.7244	-0.0333325	16.7988	10.6698	1.70379
2014-05-15	1899-12-31 22:00:00	F	0.00139559	0.0476379	-2.10601	-0.0340592	17.0031	10.3099	1.73296
2014-05-15	1899-12-31 22:30:00	-9999	-9999	-9999	-1.45637	-0.0275382		-9999
2014-05-15	1899-12-31 23:00:00	-9999	-9999	-9999	-1.05091	-0.0256059		-9999
2014-05-15	1899-12-31 23:30:00	F	0.0140826	0.0379991	-1.15402	-0.0280219	16.1861	11.0085	1.63243
2014-05-16	1899-12-31	F	-0.0627066	0.0373452	-0.283369	-0.0176347	16.6843	10.7157	1.69057
2014-05-16	1899-12-31 00:30:00	F	-0.00736469	0.0677679	-2.75729	-0.0154606	15.0866	12.7326	1.49193
2014-05-16	1899-12-31 01:00:00	F	0.470577	0.00842653	-2.45553	-0.0195675	15.4488	12.0747	1.53856
2014-05-16	1899-12-31 01:30:00	F	-0.0130575	0.0620342	-2.32803	-0.0241573	15.8768	11.4596	1.59239
2014-05-16	1899-12-31 02:00:00	F	0.0118654	0.0338047	-2.50855	-0.0243983	15.6274	11.8847	1.55965
2014-05-16	1899-12-31 02:30:00	F	-0.672999	0.124129	-3.14736	-0.0263306	14.7535	13.2224	1.45207
2014-05-16	1899-12-31 03:00:00	F	-0.243418	0.0894441	-2.53283	-0.0256067	14.2817	14.2352	1.39202
2014-05-16	1899-12-31 03:30:00	F	0.18192	0.0416745	-2.27305	-0.0144949	14.5417	13.8014	1.42279
2014-05-16	1899-12-31 04:00:00	F	0.0804604	0.0402554	-2.4934	-0.0132872	14.7471	13.5273	1.44636
2014-05-16	1899-12-31 04:30:00	F	0.00201205	0.0294739	-2.58944	-0.0183604	15.0804	13.9391	1.47072
2014-05-16	1899-12-31 05:00:00	T	0.0521874	0.0733734	-2.66843	-0.00579793	14.7564	14.7915	1.42606
2014-05-16	1899-12-31 05:30:00	T	-0.0300963	0.0589097	-2.83105	0.20293	14.3678	15.5049	1.37907
2014-05-16	1899-12-31 06:00:00	T	0.217014	0.108064	2.57628	11.5496	13.8966	17.6914	1.30296
2014-05-16	1899-12-31 06:30:00	T	-0.0520183	0.0662445	34.2198	67.4572	14.2244	17.7293	1.33035
2014-05-16	1899-12-31 07:00:00	T	-0.2823	0.147422	120.293	222.25	14.3348	18.7975	1.32249
2014-05-16	1899-12-31 07:30:00	T	-1.06383	0.172959	218.069	393.191	15.4717	19.0099	1.41927
2014-05-16	1899-12-31 08:00:00	T	-1.42357	0.168329	345.87	613.297	16.9637	17.939	1.58157
2014-05-16	1899-12-31 08:30:00	T	-1.60437	0.154887	496.362	893.487	18.2938	13.5444	1.8121
2014-05-16	1899-12-31 09:00:00	T	-1.12636	0.193657	501.868	921.597	19.1746	10.042	1.99228
2014-05-16	1899-12-31 09:30:00	T	-1.53566	0.246579	632.303	1159.64	19.6406	9.37563	2.06606
2014-05-16	1899-12-31 10:00:00	T	-1.21807	0.282385	667.578	1242.93	20.1862	8.75414	2.15176
2014-05-16	1899-12-31 10:30:00	T	-0.628382	0.311754	686.628	1274.66	20.3527	9.0461	2.16705
2014-05-16	1899-12-31 11:00:00	T	-1.15339	0.322877	900.622	1671.99	20.6032	8.72914	2.20847
2014-05-16	1899-12-31 11:30:00	T	-1.1703	0.348616	949.79	1781.26	20.8947	8.81552	2.24633
2014-05-16	1899-12-31 12:00:00	T	-0.703215	0.457974	970.837	1836.97	21.2014	9.29851	2.27692
2014-05-16	1899-12-31 12:30:00	T	-1.10959	0.443838	978.298	1862.52	21.3045	9.02653	2.29824
2014-05-16	1899-12-31 13:00:00	T	-0.750225	0.339914	942.658	1816.26	21.8314	9.29158	2.3666
2014-05-16	1899-12-31 13:30:00	T	-1.02707	0.452158	960.078	1855.87	21.9194	9.14275	2.38325
2014-05-16	1899-12-31 14:00:00	T	-0.752791	0.465958	936.423	1825.69	22.1792	8.85074	2.42907
2014-05-16	1899-12-31 14:30:00	T	-0.896218	0.250889	768.61	1515.53	22.0282	8.97835	2.40345
2014-05-16	1899-12-31 15:00:00	T	-1.28237	0.672436	741.661	1462.81	22.3592	8.81819	2.4567
2014-05-16	1899-12-31 15:30:00	T	-0.511044	0.371367	329.56	679.481	22.2127	8.89384	2.43288
2014-05-16	1899-12-31 16:00:00	T	-0.474624	0.367756	282.974	594.497	22.0122	9.2509	2.39391
2014-05-16	1899-12-31 16:30:00	T	-0.549917	0.313208	281.736	589.719	21.8973	9.2857	2.37628
2014-05-16	1899-12-31 17:00:00	T	-1.29964	0.355517	318.759	651.478	21.9007	9.33074	2.37559
2014-05-16	1899-12-31 17:30:00	T	-0.783406	0.25524	276.174	569.212	21.9015	9.41246	2.37357
2014-05-16	1899-12-31 18:00:00	T	-0.358954	0.211466	196.031	411.393	21.7706	9.39437	2.35515
2014-05-16	1899-12-31 18:30:00	T	-0.331659	0.225849	163.992	339.635	21.6422	9.42965	2.33584
2014-05-16	1899-12-31 19:00:00	F	-0.490337	0.149711	125.37	263.116	21.6049	9.62422	2.3255
2014-05-16	1899-12-31 19:30:00	F	0.213477	0.187199	48.4654	101.821	21.1466	10.2257	2.24608
2014-05-16	1899-12-31 20:00:00	F	0.0512093	0.0699619	7.77433	25.8628	20.0969	11.0913	2.08508
2014-05-16	1899-12-31 20:30:00	F	0.141318	0.0948546	-4.11709	1.03062	19.4188	11.9746	1.97934
2014-05-16	1899-12-31 21:00:00	F	0.189778	0.144309	-4.23459	-0.0601232	18.7904	13.0046	1.88101
2014-05-16	1899-12-31 21:30:00	F	0.877512	0.319973	-4.21869	-0.0514343	18.212	15.1315	1.76971
2014-05-16	1899-12-31 22:00:00	F	0.0250978	0.390284	-4.79874	-0.0572327	17.0644	21.3288	1.52592
2014-05-16	1899-12-31 22:30:00	F	0.427833	0.338951	-4.97828	-0.0470923	16.1195	23.6497	1.39455
2014-05-16	1899-12-31 23:00:00	F	0.424319	0.36057	-4.16922	-0.0425062	15.8609	23.9514	1.36628
2014-05-16	1899-12-31 23:30:00	F	0.367013	0.372538	-4.136	-0.0297075	15.613	24.4515	1.33593
2014-05-17	1899-12-31	F	0.258011	0.489342	-4.17598	-0.0251192	15.6306	24.8171	1.33096
2014-05-17	1899-12-31 00:30:00	F	0.684672	0.429225	-4.60048	-0.0147334	15.1929	24.8151	1.29414
2014-05-17	1899-12-31 01:00:00	F	0.436696	0.415376	-4.39229	-0.0318832	14.8198	27.0808	1.22535
2014-05-17	1899-12-31 01:30:00	F	0.398107	0.390875	-4.3142	-0.0410629	14.482	27.7019	1.1887
2014-05-17	1899-12-31 02:00:00	F	0.470599	0.396747	-4.05738	-0.0371996	14.4347	28.6967	1.16876
2014-05-17	1899-12-31 02:30:00	F	0.5794	0.375957	-4.1199	-0.0253638	14.6579	26.8537	1.21639
2014-05-17	1899-12-31 03:00:00	F	0.337331	0.351435	-4.25966	-0.0304365	14.5205	25.5971	1.22636
2014-05-17	1899-12-31 03:30:00	F	0.304983	0.22174	-4.45513	-0.0301954	13.7895	28.2172	1.12843
2014-05-17	1899-12-31 04:00:00	F	0.191473	0.267468	-4.06075	-0.0258481	13.7469	28.025	1.12832
2014-05-17	1899-12-31 04:30:00	F	0.290173	0.289819	-4.26245	-0.0224666	13.4526	27.9814	1.10758
2014-05-17	1899-12-31 05:00:00	T	0.366938	0.213412	-4.56145	-0.0239168	12.4243	30.7461	0.995751
2014-05-17	1899-12-31 05:30:00	T	0.354329	0.220831	-4.11875	0.329307	11.7623	33.7002	0.912595
2014-05-17	1899-12-31 06:00:00	T	0.175872	0.226187	5.66958	16.7505	11.9452	33.6471	0.924419
2014-05-17	1899-12-31 06:30:00	T	-0.181751	0.260579	72.2267	120.67	12.6709	30.6071	1.01403
2014-05-17	1899-12-31 07:00:00	T	-0.497292	0.245313	115.41	209.156	13.677	28.8718	1.10998
2014-05-17	1899-12-31 07:30:00	T	-0.826026	0.259444	212.878	380.46	14.706	28.5532	1.19182
2014-05-17	1899-12-31 08:00:00	T	-0.857097	0.312198	292.916	534.237	16.0174	26.1818	1.33953
2014-05-17	1899-12-31 08:30:00	T	-1.06613	0.365275	396.053	727.712	17.2817	24.328	1.48805
2014-05-17	1899-12-31 09:00:00	T	-1.25059	0.370365	354.905	672.499	17.6716	24.5048	1.52157
2014-05-17	1899-12-31 09:30:00	T	-1.2952	0.378534	649.647	1186.45	18.7828	21.9205	1.68736
2014-05-17	1899-12-31 10:00:00	T	-1.75986	0.340422	650.141	1215.12	19.8458	17.5526	1.90367
2014-05-17	1899-12-31 10:30:00	T	-1.10618	0.492981	678.521	1286.78	20.2896	15.5863	2.00336
2014-05-17	1899-12-31 11:00:00	T	-1.18494	0.418642	599.549	1157.47	20.7006	15.5501	2.05568
2014-05-17	1899-12-31 11:30:00	T	-0.640686	0.508122	621.461	1193.82	20.8229	14.7083	2.09186
2014-05-17	1899-12-31 12:00:00	T	-0.669628	0.514305	708.553	1353.85	20.9063	14.1699	2.1159
2014-05-17	1899-12-31 12:30:00	T	-0.810827	0.540032	1024.37	1951.92	21.5467	13.0861	2.22844
2014-05-17	1899-12-31 13:00:00	T	-1.33938	0.461893	589.666	1156.79	20.9328	13.1797	2.14381
2014-05-17	1899-12-31 13:30:00	T	-0.933123	0.310195	770.352	1516.84	21.3348	11.8873	2.23008
2014-05-17	1899-12-31 14:00:00	T	-1.00598	0.315057	664.197	1324.72	21.6502	11.3431	2.28759
2014-05-17	1899-12-31 14:30:00	T	-1.8153	0.293774	599.384	1204.65	22.1374	11.6997	2.34713
2014-05-17	1899-12-31 15:00:00	T	-1.31876	0.220234	557.21	1126.29	22.0415	11.5828	2.33655
2014-05-17	1899-12-31 15:30:00	T	-0.9384	0.334155	588.202	1179.61	22.4475	11.3876	2.40028
2014-05-17	1899-12-31 16:00:00	T	-1.5613	0.23099	542.616	1097.32	22.5051	11.9689	2.3929
2014-05-17	1899-12-31 16:30:00	T	-1.43354	0.348168	448.364	916.254	22.5349	12.5617	2.38107
2014-05-17	1899-12-31 17:00:00	T	-0.477429	0.453174	376.786	765.819	22.1657	13.7499	2.29657
2014-05-17	1899-12-31 17:30:00	T	-0.602882	0.501353	233.813	479.582	21.5734	16.0343	2.15635
2014-05-17	1899-12-31 18:00:00	T	-0.303358	0.49131	151.419	315.276	20.9004	17.8397	2.02465
2014-05-17	1899-12-31 18:30:00	T	-0.0782513	0.419697	104.877	219.355	20.4108	18.9315	1.93839
2014-05-17	1899-12-31 19:00:00	F	0.0370604	0.370863	54.7266	116.859	20.0816	20.13	1.87126
2014-05-17	1899-12-31 19:30:00	F	0.328284	0.357811	17.1118	41.2433	19.6024	21.5145	1.785
2014-05-17	1899-12-31 20:00:00	F	0.557673	0.312498	1.50069	10.1848	19.0398	22.2976	1.70637
2014-05-17	1899-12-31 20:30:00	F	0.302638	0.227598	-3.4528	0.599253	18.2437	24.1722	1.58427
2014-05-17	1899-12-31 21:00:00	F	0.478681	0.263783	-3.87045	-0.057951	17.8369	25.7781	1.51156
2014-05-17	1899-12-31 21:30:00	F	0.334608	0.228364	-3.40114	-0.0509519	17.3011	26.3682	1.4497
2014-05-17	1899-12-31 22:00:00	F	0.356196	0.195316	-3.32128	-0.0545771	16.9364	26.8599	1.40715
2014-05-17	1899-12-31 22:30:00	F	0.466108	0.219717	-4.04444	-0.0584429	16.5511	28.2635	1.34677
2014-05-17	1899-12-31 23:00:00	F	0.475261	0.280323	-4.35297	-0.0540988	16.043	29.988	1.27251
2014-05-17	1899-12-31 23:30:00	F	0.402898	0.291383	-4.04333	-0.0509618	15.7013	32.4584	1.20107
2014-05-18	1899-12-31	F	0.416523	0.230586	-4.17269	-0.0512051	15.4652	34.9294	1.13974
2014-05-18	1899-12-31 00:30:00	F	0.321413	0.202942	-4.21947	-0.0560376	14.6966	37.8777	1.0356
2014-05-18	1899-12-31 01:00:00	F	0.527421	0.309925	-3.48239	-0.0516925	15.3038	37.514	1.08318
2014-05-18	1899-12-31 01:30:00	F	0.442815	0.309304	-4.42182	-0.0451703	15.0546	38.4956	1.04921
2014-05-18	1899-12-31 02:00:00	F	0.395576	0.26713	-4.41769	-0.0524167	14.42	40.7938	0.969492
2014-05-18	1899-12-31 02:30:00	F	0.241069	0.278801	-4.09154	-0.04952	14.1045	42.107	0.928815
2014-05-18	1899-12-31 03:00:00	F	0.438794	0.358248	-4.15935	-0.0463813	14.0214	42.5785	0.916297
2014-05-18	1899-12-31 03:30:00	F	0.319952	0.334318	-4.28032	-0.0427583	13.7347	43.8863	0.878902
2014-05-18	1899-12-31 04:00:00	F	0.455301	0.32213	-4.07681	-0.0456582	13.4967	45.0373	0.847642
2014-05-18	1899-12-31 04:30:00	F	0.257877	0.314861	-4.01909	-0.0386534	12.5974	47.4706	0.763856
2014-05-18	1899-12-31 05:00:00	T	0.283553	0.329401	-3.75428	-0.0379305	12.2614	49.3405	0.720579
2014-05-18	1899-12-31 05:30:00	T	0.259034	0.345616	-3.64321	0.363381	11.9441	51.6704	0.673214
2014-05-18	1899-12-31 06:00:00	T	0.0693064	0.250278	3.9692	15.3614	11.5443	53.7292	0.627736
2014-05-18	1899-12-31 06:30:00	T	-0.102537	0.326796	55.5439	96.4745	12.0544	53.0587	0.658642
2014-05-18	1899-12-31 07:00:00	T	-0.34799	0.432206	147.363	249.436	14.0861	49.4993	0.809208
2014-05-18	1899-12-31 07:30:00	T	-0.817781	0.431029	255.72	438.092	14.9432	47.1431	0.8952
2014-05-18	1899-12-31 08:00:00	T	-1.0837	0.504172	365.812	637.88	16.143	44.3506	1.01784
2014-05-18	1899-12-31 08:30:00	T	-1.4204	0.595318	470.36	833.646	17.0358	43.2576	1.09844
2014-05-18	1899-12-31 09:00:00	T	-1.27376	0.580619	571.281	1026.49	18.1213	38.2117	1.28094
2014-05-18	1899-12-31 09:30:00	T	-1.43873	0.640886	669.8	1216.24	18.965	36.1646	1.39517
2014-05-18	1899-12-31 10:00:00	T	-1.1548	0.617655	754.807	1383.43	19.6564	35.0112	1.48284
2014-05-18	1899-12-31 10:30:00	T	-1.34183	0.621935	826.308	1532.02	20.6483	31.0562	1.67264
2014-05-18	1899-12-31 11:00:00	T	-1.15532	0.532789	886.124	1662.78	21.3933	28.3221	1.82044
2014-05-18	1899-12-31 11:30:00	T	-1.17277	0.554513	932.215	1768.94	22.055	27.2618	1.92358
2014-05-18	1899-12-31 12:00:00	T	-1.32849	0.571972	915.828	1755.41	22.6035	27.2456	1.98926
2014-05-18	1899-12-31 12:30:00	T	-0.907337	0.470428	921.158	1782.36	22.8507	26.3283	2.04477
2014-05-18	1899-12-31 13:00:00	T	-0.662893	0.68719	848.75	1651.02	23.4136	24.3581	2.17212
2014-05-18	1899-12-31 13:30:00	T	-1.84218	0.759026	771.287	1512.69	23.3324	22.2242	2.22255
2014-05-18	1899-12-31 14:00:00	T	-1.70969	0.74409	665.954	1316.17	23.1166	22.3908	2.18906
2014-05-18	1899-12-31 14:30:00	T	-1.45046	0.714983	672.775	1323.89	23.3234	19.7277	2.29269
2014-05-18	1899-12-31 15:00:00	T	-1.10395	0.59013	595.766	1184.54	23.3219	19.6651	2.29427
2014-05-18	1899-12-31 15:30:00	T	-0.679842	0.493933	528.323	1055.91	23.2681	19.267	2.29818
2014-05-18	1899-12-31 16:00:00	T	-1.23581	0.775232	328.923	666.586	22.8318	21.251	2.18329
2014-05-18	1899-12-31 16:30:00	T	-0.778721	0.867413	185.702	386.74	21.86	19.2864	2.10941
2014-05-18	1899-12-31 17:00:00	T	-0.091461	0.756569	99.4064	218.639	21.0427	19.644	1.99756
2014-05-18	1899-12-31 17:30:00	T	-0.124165	0.818862	66.4451	150.009	20.5053	20.1815	1.91964
2014-05-18	1899-12-31 18:00:00	T	0.00114743	0.715594	47.1005	107.388	20.2421	20.0444	1.89196
2014-05-18	1899-12-31 18:30:00	T	0.0393168	0.817085	39.9781	88.7865	19.6269	19.2993	1.83819
2014-05-18	1899-12-31 19:00:00	F	0.194131	0.799722	33.3547	71.9115	19.2534	18.412	1.81574
2014-05-18	1899-12-31 19:30:00	F	0.201027	0.644342	39.5853	77.0916	18.9562	18.0434	1.79047
2014-05-18	1899-12-31 20:00:00	F	0.324258	0.620557	8.41189	20.9967	18.3885	17.6978	1.73529
2014-05-18	1899-12-31 20:30:00	F	0.31143	0.569534	-2.88022	0.742462	17.6404	17.8339	1.65282
2014-05-18	1899-12-31 21:00:00	F	0.430745	0.59045	-2.93806	-0.0514332	16.9936	18.0387	1.58264
2014-05-18	1899-12-31 21:30:00	F	0.264662	0.425178	-2.91632	-0.0543341	16.5246	18.7406	1.52305
2014-05-18	1899-12-31 22:00:00	F	0.329075	0.426074	-2.54502	-0.0482993	16.2928	19.2853	1.49068
2014-05-18	1899-12-31 22:30:00	F	0.371173	0.392194	-2.41077	-0.0509577	16.0556	19.981	1.45563
2014-05-18	1899-12-31 23:00:00	F	0.295207	0.210073	-2.46361	-0.0478193	15.6579	21.0947	1.39933
2014-05-18	1899-12-31 23:30:00	F	-0.253571	0.312042	-2.00367	-0.0444395	15.9691	24.3687	1.36821
2014-05-19	1899-12-31	F	0.366809	0.399673	-2.38638	-0.0432323	15.4903	24.5011	1.3246
2014-05-19	1899-12-31 00:30:00	F	0.517155	0.472964	-2.32399	-0.0454067	14.946	30.7459	1.17324
2014-05-19	1899-12-31 01:00:00	F	0.279704	0.429748	-2.373	-0.0396112	14.6327	32.0325	1.12841
2014-05-19	1899-12-31 01:30:00	F	0.917367	0.535927	-2.25236	-0.0374383	14.2325	34.0624	1.06673
2014-05-19	1899-12-31 02:00:00	F	0.363497	0.598999	-2.5781	-0.0432367	13.7586	37.9174	0.973935
2014-05-19	1899-12-31 02:30:00	F	0.36164	0.575355	-3.05716	-0.0468617	13.0742	43.769	0.843632
2014-05-19	1899-12-31 03:00:00	F	0.272893	0.633324	-3.31401	-0.0243983	12.4097	47.0824	0.76008
2014-05-19	1899-12-31 03:30:00	-9999	-9999	-9999	-3.68108	-0.0193266		-9999
2014-05-19	1899-12-31 04:00:00	-9999	-9999	-9999	-4.20916	-0.00918082		-9999
2014-05-19	1899-12-31 04:30:00	F	-0.0693204	0.564609	-4.22405	-0.00652363	10.6631	50.9496	0.627648
2014-05-19	1899-12-31 05:00:00	T	0.535449	0.557928	-4.17243	-0.0149812	10.2931	51.2391	0.60873
2014-05-19	1899-12-31 05:30:00	T	0.316791	0.524884	-3.93588	0.409589	9.54341	53.7977	0.548522
2014-05-19	1899-12-31 06:00:00	T	0.29633	0.555638	5.18997	16.8807	9.38672	53.9464	0.541024
2014-05-19	1899-12-31 06:30:00	T	0.271012	0.551366	46.5578	86.8146	9.71109	52.8739	0.565828
2014-05-19	1899-12-31 07:00:00	T	-0.659456	0.557386	132.811	229.123	10.5784	50.0028	0.636166
2014-05-19	1899-12-31 07:30:00	T	-1.13487	0.577458	241.785	413.429	11.8399	45.335	0.756273
2014-05-19	1899-12-31 08:00:00	T	-1.12029	0.605153	354.718	612.966	12.8686	41.349	0.868195
2014-05-19	1899-12-31 08:30:00	T	-1.59744	0.651967	460.939	806.751	13.8038	38.3217	0.970442
2014-05-19	1899-12-31 09:00:00	T	-1.45909	0.635111	571.355	1011.2	14.816	35.1954	1.08868
2014-05-19	1899-12-31 09:30:00	T	-1.43256	0.643228	672.188	1202.48	16.1441	30.2368	1.2762
2014-05-19	1899-12-31 10:00:00	T	-1.65859	0.656289	763.4	1380.99	17.1451	27.3529	1.41625
2014-05-19	1899-12-31 10:30:00	T	-1.40817	0.687646	838.276	1534.81	18.5803	22.9243	1.6447
2014-05-19	1899-12-31 11:00:00	T	-1.24003	0.604609	902.63	1671.56	19.5039	20.4765	1.79758
2014-05-19	1899-12-31 11:30:00	T	-1.73176	0.613571	935.132	1752.14	20.2633	17.6158	1.952
2014-05-19	1899-12-31 12:00:00	T	-1.33209	0.568339	973.068	1840.82	20.36	15.7222	2.00885
2014-05-19	1899-12-31 12:30:00	T	-1.31043	0.488456	991.896	1889.77	20.7851	14.6914	2.08741
2014-05-19	1899-12-31 13:00:00	T	-0.771561	0.570975	994.162	1907.36	21.2021	14.2004	2.15392
2014-05-19	1899-12-31 13:30:00	T	-1.30372	0.488448	987.255	1903.93	21.7226	13.3093	2.24677
2014-05-19	1899-12-31 14:00:00	T	-1.38678	0.566788	960.271	1863.77	21.8014	13.5387	2.25162
2014-05-19	1899-12-31 14:30:00	T	-1.16054	0.558454	910.208	1773.56	22.1502	13.8662	2.29131
2014-05-19	1899-12-31 15:00:00	T	-1.54102	0.56343	864.239	1688.55	22.2067	13.8909	2.29854
2014-05-19	1899-12-31 15:30:00	T	-1.25155	0.540024	797.252	1565.06	22.5916	13.7951	2.35557
2014-05-19	1899-12-31 16:00:00	T	-1.28264	0.546369	712.964	1408.88	22.7263	13.6048	2.38013
2014-05-19	1899-12-31 16:30:00	T	-0.884908	0.522923	623.013	1246.64	22.7648	13.1667	2.3978
2014-05-19	1899-12-31 17:00:00	T	-1.02681	0.519063	528.867	1069.57	22.9226	12.7831	2.43154
2014-05-19	1899-12-31 17:30:00	T	-1.3257	0.528237	422.205	871.259	22.8867	12.7483	2.42722
2014-05-19	1899-12-31 18:00:00	T	-1.05152	0.457086	317.456	669.11	22.7098	12.7419	2.40152
2014-05-19	1899-12-31 18:30:00	T	-0.964498	0.450266	213.881	461.995	22.5368	12.8013	2.37483
2014-05-19	1899-12-31 19:00:00	F	-0.48455	0.389927	122.773	258.144	22.2106	12.8427	2.32709
2014-05-19	1899-12-31 19:30:00	F	-0.0838219	0.328452	53.8376	106.445	21.6126	12.9914	2.23989
2014-05-19	1899-12-31 20:00:00	F	-0.0736026	0.110781	7.93594	29.8104	20.4749	14.233	2.0589
2014-05-19	1899-12-31 20:30:00	F	0.042093	0.0669785	-4.4854	1.67829	19.8112	15.2629	1.95236
2014-05-19	1899-12-31 21:00:00	F	0.122108	0.0664727	-3.23663	-0.0482919	20.0439	14.3637	2.00173
2014-05-19	1899-12-31 21:30:00	F	0.0448073	0.0715791	-2.41941	-0.0468475	20.0894	13.6059	2.02515
2014-05-19	1899-12-31 22:00:00	F	0.0200448	0.0571433	-2.00623	-0.0439525	20.0006	13.3356	2.02036
2014-05-19	1899-12-31 22:30:00	F	0.0277182	0.028733	-1.88485	-0.050716	19.891	13.1949	2.00994
2014-05-19	1899-12-31 23:00:00	F	0.287724	0.0951428	-2.23909	-0.0553066	19.2302	13.8593	1.91433
2014-05-19	1899-12-31 23:30:00	F	0.0506656	0.0308934	-2.35927	-0.0567583	19.4531	13.813	1.94212
2014-05-20	1899-12-31	F	0.0444443	0.0509502	-2.65323	-0.0512042	19.3513	14.0474	1.92461
2014-05-20	1899-12-31 00:30:00	F	0.046854	0.0297274	-2.91817	-0.0483062	19.1158	14.0404	1.89674
2014-05-20	1899-12-31 01:00:00	F	-0.129015	0.157282	-4.14474	-0.0543451	16.9865	16.7202	1.60739
2014-05-20	1899-12-31 01:30:00	F	0.122291	0.261612	-4.31944	-0.0543463	15.9574	18.7057	1.46959
2014-05-20	1899-12-31 02:00:00	F	0.226161	0.253327	-4.5386	-0.0512075	15.1887	22.3648	1.33596
2014-05-20	1899-12-31 02:30:00	F	0.11366	0.234431	-4.33383	-0.0586978	14.6769	26.7279	1.21998
2014-05-20	1899-12-31 03:00:00	F	0.334647	0.229314	-4.17649	-0.0538691	14.926	30.5644	1.17479
2014-05-20	1899-12-31 03:30:00	F	-0.0756961	0.19508	-4.82569	-0.0514541	13.5117	33.6056	1.025
2014-05-20	1899-12-31 04:00:00	F	0.072148	0.232902	-3.97598	-0.0463843	12.8316	36.2263	0.941761
2014-05-20	1899-12-31 04:30:00	F	0.136153	0.244297	-3.15765	-0.0398643	14.1315	34.3266	1.05553
2014-05-20	1899-12-31 05:00:00	T	0.341478	0.301715	-4.22737	-0.0372059	14.676	33.693	1.10391
2014-05-20	1899-12-31 05:30:00	T	0.401331	0.306612	-4.0763	0.60781	14.4956	36.0274	1.0527
2014-05-20	1899-12-31 06:00:00	T	0.4103	0.389753	7.70909	21.4222	14.5954	38.1012	1.02515
2014-05-20	1899-12-31 06:30:00	T	-0.257724	0.398329	69.9058	116.224	15.2184	37.0143	1.08587
2014-05-20	1899-12-31 07:00:00	T	-0.444936	0.378761	169.431	279.973	16.21	34.4961	1.2033
2014-05-20	1899-12-31 07:30:00	T	-0.848713	0.363973	279.538	470.546	17.5759	31.3045	1.37615
2014-05-20	1899-12-31 08:00:00	T	-1.19103	0.454582	394.136	676.672	18.2318	30.4478	1.45201
2014-05-20	1899-12-31 08:30:00	T	-1.32005	0.464615	505.69	883.707	19.9555	25.7574	1.72583
2014-05-20	1899-12-31 09:00:00	T	-1.27714	0.518802	609.661	1080.37	21.2313	22.0741	1.95966
2014-05-20	1899-12-31 09:30:00	T	-0.972931	0.499216	706.423	1266.73	21.9861	20.0205	2.10634
2014-05-20	1899-12-31 10:00:00	T	-1.1584	0.489548	786.012	1429.49	22.5917	18.26	2.23352
2014-05-20	1899-12-31 10:30:00	T	-1.26538	0.457673	855.399	1577.65	23.3672	17.2093	2.37093
2014-05-20	1899-12-31 11:00:00	T	-1.29227	0.443295	912.215	1703.1	23.9067	14.3793	2.53297
2014-05-20	1899-12-31 11:30:00	T	-1.34354	0.344655	946.561	1792.26	24.5713	11.7084	2.71815
2014-05-20	1899-12-31 12:00:00	T	-1.01748	0.401205	974.704	1863.66	24.5108	11.5648	2.71275
2014-05-20	1899-12-31 12:30:00	T	-0.705197	0.34273	998.899	1919.59	25.1136	10.9908	2.83036
2014-05-20	1899-12-31 13:00:00	T	-0.882704	0.374243	1005.03	1942.37	25.1311	10.5752	2.84654
2014-05-20	1899-12-31 13:30:00	T	-0.871506	0.396628	990.098	1926.41	25.65	10.1955	2.94812
2014-05-20	1899-12-31 14:00:00	T	-0.841379	0.391683	955.522	1875.84	25.8977	10.1817	2.99216
2014-05-20	1899-12-31 14:30:00	T	-0.762906	0.453014	913.637	1796.59	26.0374	10.5836	3.00348
2014-05-20	1899-12-31 15:00:00	T	-0.523932	0.473114	865.909	1707.05	26.0168	10.4661	3.00377
2014-05-20	1899-12-31 15:30:00	T	-1.0108	0.463595	798.615	1582.28	26.1933	10.5971	3.0308
2014-05-20	1899-12-31 16:00:00	T	-0.668372	0.439112	721.183	1442.6	26.0818	11.2085	2.99031
2014-05-20	1899-12-31 16:30:00	T	-0.872145	0.513699	628.017	1268.56	26.1979	11.9356	2.98623
2014-05-20	1899-12-31 17:00:00	T	-0.929241	0.448824	538.106	1101.32	26.3449	12.2258	3.0023
2014-05-20	1899-12-31 17:30:00	T	-0.840144	0.464956	423.471	883.204	26.0066	12.9468	2.91874
2014-05-20	1899-12-31 18:00:00	T	-0.616387	0.418598	252.234	543.182	25.6217	13.3862	2.83856
2014-05-20	1899-12-31 18:30:00	T	-0.569105	0.416598	196.493	431.794	25.3821	13.8035	2.78499
2014-05-20	1899-12-31 19:00:00	F	-0.267581	0.387104	110.961	235.55	25.0325	14.0296	2.72051
2014-05-20	1899-12-31 19:30:00	F	-0.00702438	0.35341	54.2489	105.117	24.396	15.0448	2.58809
2014-05-20	1899-12-31 20:00:00	F	0.369958	0.305449	9.14974	30.7902	23.3273	15.894	2.40282
2014-05-20	1899-12-31 20:30:00	F	0.454145	0.311904	-5.06103	1.71677	22.1936	16.3442	2.23125
2014-05-20	1899-12-31 21:00:00	F	0.325405	0.317915	-5.12909	-0.0490029	21.3711	17.4355	2.09425
2014-05-20	1899-12-31 21:30:00	F	0.446939	0.428961	-4.9281	-0.0649403	20.8636	19.3767	1.98227
2014-05-20	1899-12-31 22:00:00	F	0.521602	0.458499	-4.68891	-0.0550452	20.5241	20.3863	1.91693
2014-05-20	1899-12-31 22:30:00	F	0.449879	0.493556	-4.75304	-0.0603589	20.0579	21.519	1.836
2014-05-20	1899-12-31 23:00:00	F	0.461867	0.477546	-4.58333	-0.0564982	19.8226	21.7702	1.80365
2014-05-20	1899-12-31 23:30:00	F	0.445058	0.451747	-4.70244	-0.0637436	19.6211	21.6394	1.78422
2014-05-21	1899-12-31	F	0.426967	0.445294	-4.55339	-0.0560183	19.4642	21.5955	1.7679
2014-05-21	1899-12-31 00:30:00	F	0.38415	0.375425	-5.04175	-0.0581928	19.1272	22.9574	1.70112
2014-05-21	1899-12-31 01:00:00	F	0.545386	0.524244	-4.54717	-0.0639894	19.0869	23.3931	1.68725
2014-05-21	1899-12-31 01:30:00	F	0.106405	0.549707	-4.49846	-0.0586777	18.8541	24.1856	1.6457
2014-05-21	1899-12-31 02:00:00	F	0.309827	0.413078	-5.12712	-0.0531243	17.7233	26.8176	1.47975
2014-05-21	1899-12-31 02:30:00	F	0.663425	0.406297	-4.6483	-0.0596475	17.395	29.5002	1.39627
2014-05-21	1899-12-31 03:00:00	F	0.498923	0.420446	-4.62326	-0.0557865	17.197	31.3444	1.34281
2014-05-21	1899-12-31 03:30:00	F	0.653482	0.516426	-4.29672	-0.0526488	17.1491	34.4219	1.27871
2014-05-21	1899-12-31 04:00:00	F	0.554216	0.504572	-4.48302	-0.0507173	16.4747	38.2406	1.15377
2014-05-21	1899-12-31 04:30:00	F	0.526525	0.41063	-4.65278	-0.0444395	15.937	42.6555	1.03516
2014-05-21	1899-12-31 05:00:00	T	0.00455381	0.288178	-5.01686	-0.0425092	15.1212	48.0504	0.889961
2014-05-21	1899-12-31 05:30:00	T	0.0226644	0.125561	-3.99118	0.620805	14.6498	52.1252	0.795602
2014-05-21	1899-12-31 06:00:00	T	0.0736202	0.100774	7.48121	20.6556	14.1509	54.4752	0.732521
2014-05-21	1899-12-31 06:30:00	T	-0.266614	0.0763809	68.9412	115.674	14.2045	55.4611	0.719145
2014-05-21	1899-12-31 07:00:00	T	-0.817694	0.281534	166.093	276.079	15.6074	52.7969	0.834242
2014-05-21	1899-12-31 07:30:00	T	-1.14701	0.463305	274.71	465.278	18.3327	47.2469	1.10813
2014-05-21	1899-12-31 08:00:00	T	-1.12305	0.415682	384.202	665.779	19.429	44.1853	1.25553
2014-05-21	1899-12-31 08:30:00	T	-1.13861	0.575391	494.136	869.348	20.2105	42.3494	1.36122
2014-05-21	1899-12-31 09:00:00	T	-1.45339	0.602092	596.958	1064.69	21.0105	39.1829	1.50857
2014-05-21	1899-12-31 09:30:00	T	-1.266	0.666772	693.641	1248.52	21.7533	35.5599	1.6729
2014-05-21	1899-12-31 10:00:00	T	-1.2854	0.708371	779.624	1417.29	22.7257	30.79	1.90634
2014-05-21	1899-12-31 10:30:00	T	-1.01177	0.7228	852.962	1566.36	23.557	26.0911	2.14074
2014-05-21	1899-12-31 11:00:00	T	-0.867875	0.697567	911.395	1692.65	24.1947	25.0749	2.25497
2014-05-21	1899-12-31 11:30:00	T	-1.26796	0.743064	959.991	1799.06	25.0764	21.8206	2.48026
2014-05-21	1899-12-31 12:00:00	T	-1.11243	0.751143	985.683	1866.47	25.5819	17.8103	2.68711
2014-05-21	1899-12-31 12:30:00	T	-1.17208	0.713212	999.903	1909.48	26.1391	15.3681	2.8598
2014-05-21	1899-12-31 13:00:00	T	-0.789644	0.67905	1000.73	1920.96	26.2463	12.7267	2.96784
2014-05-21	1899-12-31 13:30:00	T	-0.490297	0.604723	988.649	1909.58	26.4043	11.9882	3.02099
2014-05-21	1899-12-31 14:00:00	T	-0.620953	0.667421	954.16	1858.74	26.5358	13.0855	3.00652
2014-05-21	1899-12-31 14:30:00	T	-0.388557	0.568929	912.247	1790.76	26.4247	14.4863	2.93872
2014-05-21	1899-12-31 15:00:00	T	-0.773522	0.558235	861.511	1700.36	26.7115	14.5583	2.98624
2014-05-21	1899-12-31 15:30:00	T	-1.11178	0.50408	788.994	1568.62	26.534	14.5374	2.95595
2014-05-21	1899-12-31 16:00:00	T	-0.794754	0.57341	710.983	1423.18	26.8912	14.4276	3.02257
2014-05-21	1899-12-31 16:30:00	T	-0.846897	0.553021	624.934	1264.7	26.6819	15.2673	2.9563
2014-05-21	1899-12-31 17:00:00	T	-0.805022	0.482105	531.925	1092.82	26.6692	15.3176	2.95233
2014-05-21	1899-12-31 17:30:00	T	-0.763046	0.464061	419.752	878.194	26.5936	15.3638	2.93763
2014-05-21	1899-12-31 18:00:00	T	-0.731205	0.476474	319.41	684.237	26.4505	16.4953	2.874
2014-05-21	1899-12-31 18:30:00				194.221	429.112			0
2014-05-21	1899-12-31 19:00:00				99.1237	215.371			0
2014-05-21	1899-12-31 19:30:00				57.1213	115.999			0
2014-05-21	1899-12-31 20:00:00				8.74466	28.7581			0
2014-05-21	1899-12-31 20:30:00	F	0.592424	0.329661	-4.39261	1.86197	23.072	23.6131	2.14876
2014-05-21	1899-12-31 21:00:00	F	0.607928	0.332711	-4.84035	-0.0412759	22.3385	25.8708	1.9945
2014-05-21	1899-12-31 21:30:00	F	0.55178	0.273314	-4.54412	-0.0654178	21.5348	28.392	1.83447
2014-05-21	1899-12-31 22:00:00	F	0.498293	0.256349	-4.35113	-0.0632501	20.8433	30.6063	1.70389
2014-05-21	1899-12-31 22:30:00	F	0.548036	0.262314	-4.16901	-0.056977	20.7189	32.4792	1.64523
2014-05-21	1899-12-31 23:00:00	F	-0.0805724	0.302036	-4.15111	-0.0593938	19.7406	34.7062	1.49761
2014-05-21	1899-12-31 23:30:00	F	0.126679	0.324863	-3.78747	-0.0601215	19.0481	36.9962	1.38414
2014-05-22	1899-12-31	F	0.296193	0.39286	-3.98673	-0.0625396	18.3114	37.8773	1.30333
2014-05-22	1899-12-31 00:30:00	F	0.159022	0.414789	-3.91399	-0.0584382	17.8195	37.327	1.27486
2014-05-22	1899-12-31 01:00:00	F	0.0616846	0.458303	-3.83322	-0.0579579	17.8968	38.8825	1.24927
2014-05-22	1899-12-31 01:30:00	F	0.480538	0.519442	-3.98443	-0.0533709	17.8193	40.4787	1.21071
2014-05-22	1899-12-31 02:00:00	F	0.391712	0.46352	-3.97264	-0.0550619	17.4328	39.3865	1.20325
2014-05-22	1899-12-31 02:30:00	F	0.327921	0.501059	-3.7293	-0.0555458	17.3014	37.7893	1.22476
2014-05-22	1899-12-31 03:00:00	F	0.516009	0.547627	-3.62861	-0.0475768	17.3686	37.2868	1.23991
2014-05-22	1899-12-31 03:30:00	F	0.561399	0.575147	-3.66004	-0.0524069	17.1686	38.1032	1.20839
2014-05-22	1899-12-31 04:00:00	F	0.456743	0.545561	-3.75133	-0.0533733	16.7172	39.4358	1.149
2014-05-22	1899-12-31 04:30:00	F	0.421342	0.572779	-3.73595	-0.0533743	16.5178	39.7127	1.12935
2014-05-22	1899-12-31 05:00:00	T	0.522883	0.558057	-3.64307	-0.0478208	16.4555	40.7691	1.10517
2014-05-22	1899-12-31 05:30:00	T	0.630597	0.617231	-3.20472	0.715633	16.188	41.7362	1.06874
2014-05-22	1899-12-31 06:00:00	T	0.303789	0.608432	9.35481	23.1355	15.935	42.4015	1.03961
2014-05-22	1899-12-31 06:30:00	T	-0.176608	0.63087	65.2916	112.893	16.3342	40.7269	1.09744
2014-05-22	1899-12-31 07:00:00	T	-0.467082	0.590839	155.036	264.734	16.6123	40.7249	1.11707
2014-05-22	1899-12-31 07:30:00	T	-0.837094	0.68191	264.624	455.438	17.0702	40.593	1.15256
2014-05-22	1899-12-31 08:00:00	T	-1.04827	0.700625	379.854	664.172	17.5326	40.2826	1.19294
2014-05-22	1899-12-31 08:30:00	T	-1.1637	0.685459	487.298	867.828	18.5899	39.6141	1.28917
2014-05-22	1899-12-31 09:00:00	T	-1.40782	0.627613	583.5	1055.26	19.7509	38.6739	1.40745
2014-05-22	1899-12-31 09:30:00	T	-1.31012	0.582673	676.91	1238.81	20.6973	39.2518	1.47813
2014-05-22	1899-12-31 10:00:00	T	-0.761143	0.635248	768.938	1421.2	21.4112	39.2313	1.54486
2014-05-22	1899-12-31 10:30:00	T	-1.28007	0.703404	804.093	1503.75	22.0414	38.4751	1.62547
2014-05-22	1899-12-31 11:00:00	T	-0.742887	0.697695	854.493	1615.69	22.698	37.9084	1.70723
2014-05-22	1899-12-31 11:30:00	T	-0.733652	0.667868	878.791	1681.2	23.4755	37.1373	1.8116
2014-05-22	1899-12-31 12:00:00	T	-0.665077	0.780106	891.495	1721.07	24.0001	36.958	1.87499
2014-05-22	1899-12-31 12:30:00	T	-1.13666	0.747215	892.399	1735.51	24.2072	37.1781	1.89179
2014-05-22	1899-12-31 13:00:00	T	-1.09641	0.610743	770.734	1517.09	24.2122	36.6156	1.90931
2014-05-22	1899-12-31 13:30:00	T	-1.09358	0.566932	663.298	1319.33	24.5477	35.3629	1.98657
2014-05-22	1899-12-31 14:00:00	T	-1.47115	0.584609	756.066	1500.41	24.9958	34.1002	2.08029
2014-05-22	1899-12-31 14:30:00	T	-1.53851	0.6355	701.671	1398.01	25.2908	32.4612	2.16984
2014-05-22	1899-12-31 15:00:00	T	-0.722773	0.613771	730.18	1456.05	25.5212	30.2621	2.27144
2014-05-22	1899-12-31 15:30:00	T	-0.767255	0.615158	579.324	1163.49	25.5828	28.7926	2.32785
2014-05-22	1899-12-31 16:00:00	T	-0.891482	0.68313	479.225	973.314	25.2294	27.357	2.32551
2014-05-22	1899-12-31 16:30:00	T	-0.891923	0.675117	649.445	1314.7	25.453	26.6136	2.38076
2014-05-22	1899-12-31 17:00:00	T	0.391642	0.699537	497.097	1020.95	25.6036	23.1502	2.51561
2014-05-22	1899-12-31 17:30:00	T	-0.320559	0.716421	250.032	516.17	25.301	19.9794	2.57287
2014-05-22	1899-12-31 18:00:00	T	-0.662452	0.687557	214.463	442.187	24.998	19.2969	2.54845
2014-05-22	1899-12-31 18:30:00	T	0.122689	0.706801	179.126	366.863	24.3707	21.3941	2.39091
2014-05-22	1899-12-31 19:00:00	F	-0.370222	0.648896	178.382	343.6	24.0335	24.1191	2.26178
2014-05-22	1899-12-31 19:30:00	F	0.247191	0.561448	53.1634	93.4933	23.6254	24.8852	2.18468
2014-05-22	1899-12-31 20:00:00	F	0.445455	0.620305	5.1828	14.8749	23.1832	24.0136	2.15189
2014-05-22	1899-12-31 20:30:00	F	0.674819	0.624913	-2.35022	0.869378	22.8111	24.9715	2.07746
2014-05-22	1899-12-31 21:00:00	F	0.493336	0.604747	-2.80791	-0.0506896	22.3203	27.1502	1.95789
2014-05-22	1899-12-31 21:30:00	F	0.695452	0.580684	-2.86476	-0.0572089	21.7932	29.4718	1.83555
2014-05-22	1899-12-31 22:00:00	F	0.49262	0.426299	-3.2678	-0.0615565	21.0422	32.8947	1.66792
2014-05-22	1899-12-31 22:30:00	F	0.372091	0.341837	-2.82844	-0.0642157	20.5232	33.5209	1.60041
2014-05-22	1899-12-31 23:00:00	F	0.771934	0.467915	-2.59834	-0.0647019	19.9815	41.2337	1.36806
2014-05-22	1899-12-31 23:30:00	F	0.253438	0.534593	-2.56582	-0.0478046	19.3921	49.042	1.14359
2014-05-23	1899-12-31	F	0.544897	0.456308	-2.50796	-0.0388731	19.0068	51.6217	1.05992
2014-05-23	1899-12-31 00:30:00	F	-0.00718463	0.44347	-2.18527	-0.0424965	18.9129	50.3216	1.08207
2014-05-23	1899-12-31 01:00:00	F	0.603186	0.504265	-4.35766	-0.0422561	18.4984	52.4592	1.009
2014-05-23	1899-12-31 01:30:00	F	0.977513	0.459857	-8.02411	-0.0229406	16.761	67.7199	0.613933
2014-05-23	1899-12-31 02:00:00	F	1.1359	0.323213	-3.57141	-0.0388833	16.3977	74.516	0.473576
2014-05-23	1899-12-31 02:30:00	F	0.460212	0.428607	-4.94462	-0.0422667	16.6095	74.2881	0.484289
2014-05-23	1899-12-31 03:00:00	F	0.550121	0.493504	-2.27383	-0.0316404	15.7918	81.9232	0.323163
2014-05-23	1899-12-31 03:30:00	F	1.00836	0.537519	-1.08066	-0.0572432	16.3037	77.3095	0.419132
2014-05-23	1899-12-31 04:00:00	F	1.60609	0.567738	-4.98794	-0.0123181	15.5186	83.2014	0.295102
2014-05-23	1899-12-31 04:30:00	F	0.578272	0.510583	-2.9127	0.0400952	14.5041	91.483	0.140155
2014-05-23	1899-12-31 05:00:00	T	0.563367	0.496133	-1.37469	0.0217395	14.4242	92.9559	0.115317
2014-05-23	1899-12-31 05:30:00	T	0.828908	0.519676	-1.36202	0.103389	14.4104	93.5876	0.104883
2014-05-23	1899-12-31 06:00:00	T	0.633596	0.530868	1.28485	3.82617	14.7919	89.8955	0.169397
2014-05-23	1899-12-31 06:30:00	T	0.91434	0.569438	12.3572	24.863	14.9935	86.9403	0.221807
2014-05-23	1899-12-31 07:00:00	T	1.00091	0.521431	24.6513	56.4905	15.2084	84.3747	0.269082
2014-05-23	1899-12-31 07:30:00	T	0.743055	0.493038	21.5699	52.0103	15.2552	83.4834	0.28529
2014-05-23	1899-12-31 08:00:00	T	0.89982	0.502247	15.2592	42.9962	15.1734	83.7886	0.278548
2014-05-23	1899-12-31 08:30:00	T	0.404152	0.473797	37.247	99.4096	14.6915	88.3379	0.194253
2014-05-23	1899-12-31 09:00:00	T	0.390414	0.482862	70.1231	162.304	14.4675	92.3725	0.125219
2014-05-23	1899-12-31 09:30:00	T	0.894623	0.443319	46.3374	109.842	14.4809	92.1653	0.128732
2014-05-23	1899-12-31 10:00:00	T	0.751719	0.326584	35.2236	87.2935	14.5115	92.3925	0.125247
2014-05-23	1899-12-31 10:30:00	T	0.365209	0.245909	57.2565	139.465	15.0813	90.874	0.155866
2014-05-23	1899-12-31 11:00:00	T	0.627789	0.356662	70.0757	161.717	14.9942	91.06	0.151836
2014-05-23	1899-12-31 11:30:00	T	0.464662	0.327238	108.44	251.126	14.8388	93.1803	0.114669
2014-05-23	1899-12-31 12:00:00	T	0.411738	0.37904	90.7882	223.31	15.1161	91.6015	0.143759
2014-05-23	1899-12-31 12:30:00	T	0.400213	0.447137	86.5218	222.877	15.1879	90.226	0.168081
2014-05-23	1899-12-31 13:00:00	T	-0.031239	0.374477	138.103	324.674	14.8241	96.9125	0.0518634
2014-05-23	1899-12-31 13:30:00	T	-0.0604217	0.37744	118.025	282.896	15.0181	96.4869	0.0597527
2014-05-23	1899-12-31 14:00:00	T	0.115829	0.35679	112.936	268.447	15.3042	94.5683	0.0941015
2014-05-23	1899-12-31 14:30:00	T	0.056506	0.368692	159.382	356.061	15.495	93.8172	0.108433
2014-05-23	1899-12-31 15:00:00	T	-0.106249	0.323921	163.708	361.436	15.5283	94.9017	0.089602
2014-05-23	1899-12-31 15:30:00	T	0.185694	0.420273	95.5725	226.707	15.6955	92.9696	0.124892
2014-05-23	1899-12-31 16:00:00	T	-0.191515	0.437221	135.764	305.373	15.936	91.9124	0.145899
2014-05-23	1899-12-31 16:30:00	T	-1.23937	0.437137	474.793	983.779	16.968	86.7653	0.254958
2014-05-23	1899-12-31 17:00:00	T	-1.15033	0.438837	550.458	1141.9	18.1448	77.0765	0.475681
2014-05-23	1899-12-31 17:30:00	T	-0.632261	0.400054	290.739	617.759	18.4612	72.9941	0.571656
2014-05-23	1899-12-31 18:00:00	T	-0.475914	0.317541	199.611	412.812	18.608	69.3095	0.655688
2014-05-23	1899-12-31 18:30:00	T	0.0765776	0.249004	105.52	224.432	18.5722	67.3803	0.695367
2014-05-23	1899-12-31 19:00:00	F	-0.215257	0.277311	111.488	230.402	18.6877	66.6937	0.715159
2014-05-23	1899-12-31 19:30:00	F	0.439911	0.265829	39.4593	86.1823	18.2418	67.1271	0.686419
2014-05-23	1899-12-31 20:00:00	F	0.46155	0.238064	12.3575	27.9567	17.3601	71.765	0.55772
2014-05-23	1899-12-31 20:30:00	F	0.635112	0.237305	-1.59222	2.08785	16.9764	70.9321	0.560417
2014-05-23	1899-12-31 21:00:00	F	0.732587	0.226287	-2.37727	-0.0268072	16.591	73.6905	0.494968
2014-05-23	1899-12-31 21:30:00	F	0.616025	0.242698	-2.33106	-0.0408158	16.1138	75.3587	0.449708
2014-05-23	1899-12-31 22:00:00	F	0.632222	0.19082	-3.31653	-0.0437159	15.5873	78.0475	0.387372
2014-05-23	1899-12-31 22:30:00	F	0.568003	0.118837	-2.94168	-0.0352641	15.1678	78.1635	0.375095
2014-05-23	1899-12-31 23:00:00	F	0.323428	0.107	-1.87694	-0.0224645	15.751	73.1495	0.478819
2014-05-23	1899-12-31 23:30:00	F	0.200902	0.0881688	-2.38262	-0.0103871	15.8924	71.4432	0.513882
2014-05-24	1899-12-31	F	0.624316	0.215626	-2.46132	-0.0176338	16.0856	68.2609	0.578255
2014-05-24	1899-12-31 00:30:00	F	0.457419	0.278413	-3.53719	-0.040582	14.8941	70.8295	0.492375
2014-05-24	1899-12-31 01:00:00	F	0.406877	0.304001	-3.28489	-0.0277797	14.186	75.2758	0.398657
2014-05-24	1899-12-31 01:30:00	F	0.582749	0.273943	-2.90792	-0.0463818	13.9689	76.4015	0.375186
2014-05-24	1899-12-31 02:00:00	F	0.421679	0.129269	-3.10289	-0.0297145	14.239	76.2397	0.384426
2014-05-24	1899-12-31 02:30:00	F	0.0428258	0.0964655	-2.16216	-0.0475932	14.5463	72.5746	0.452645
2014-05-24	1899-12-31 03:00:00	F	0.129571	0.0436796	-2.72886	-0.0459038	14.2097	73.8348	0.422545
2014-05-24	1899-12-31 03:30:00	F	0.0721906	0.0421504	-1.87705	-0.0292341	14.1551	74.0325	0.417873
2014-05-24	1899-12-31 04:00:00	F	0.133172	0.0811266	-2.2595	-0.0258524	13.9686	72.0612	0.444202
2014-05-24	1899-12-31 04:30:00	F	0.17078	0.0408515	-1.83723	-0.0331011	13.9986	68.6665	0.49916
2014-05-24	1899-12-31 05:00:00	T	0.18859	0.0285214	-1.38305	-0.029719	14.0067	65.2171	0.554422
2014-05-24	1899-12-31 05:30:00	T	0.126444	0.0628049	-0.932995	0.869601	13.6997	64.5296	0.554225
2014-05-24	1899-12-31 06:00:00	T	0.0893717	0.0904402	12.6365	25.5844	13.6198	63.5609	0.566416
2014-05-24	1899-12-31 06:30:00	T	-0.192115	0.0351009	69.5288	122.194	13.1112	66.0598	0.510359
2014-05-24	1899-12-31 07:00:00	T	-0.745954	0.153868	157.637	278.338	13.5334	66.3051	0.52081
2014-05-24	1899-12-31 07:30:00	T	-1.19517	0.187669	270.131	481.246	12.9805	75.9236	0.358929
2014-05-24	1899-12-31 08:00:00	T	-1.28223	0.39849	353.32	643.526	14.2269	71.9448	0.453582
2014-05-24	1899-12-31 08:30:00	T	-1.41173	0.532648	319.393	601.715	14.7388	70.005	0.501256
2014-05-24	1899-12-31 09:00:00	T	-2.17102	0.671605	510.518	941.076	15.6521	66.8738	0.587052
2014-05-24	1899-12-31 09:30:00	T	-1.37075	0.620655	448.95	860.039	15.7555	65.2212	0.62044
2014-05-24	1899-12-31 10:00:00	T	0.185054	0.795829	325.975	643.962	15.6199	50.3661	0.877925
2014-05-24	1899-12-31 10:30:00	T	-1.21854	0.726202	351.399	689.355	16.0633	43.5559	1.02715
2014-05-24	1899-12-31 11:00:00	T	-1.776	0.663309	346.316	685.419	16.8914	42.7472	1.09823
2014-05-24	1899-12-31 11:30:00	T	-0.766734	0.550672	411.882	808.462	17.4948	43.2585	1.13077
2014-05-24	1899-12-31 12:00:00	T	-1.32435	0.656034	582	1121.09	17.0589	40.5746	1.15209
2014-05-24	1899-12-31 12:30:00	T	-1.30822	0.780981	682.447	1320.71	17.5183	38.3505	1.23045
2014-05-24	1899-12-31 13:00:00	T	-0.99544	0.865654	529.88	1041.73	16.4993	36.0581	1.19644
2014-05-24	1899-12-31 13:30:00	T	-0.724351	0.731736	181.007	404.332	15.2683	38.705	1.0601
2014-05-24	1899-12-31 14:00:00	T	-1.42485	0.727707	316.327	665.435	15.1445	41.3154	1.0069
2014-05-24	1899-12-31 14:30:00	T	-1.68535	0.739276	603.288	1201.84	14.9064	45.861	0.914753
2014-05-24	1899-12-31 15:00:00	T	-1.15438	0.63075	423.767	856.645	14.805	45.973	0.906917
2014-05-24	1899-12-31 15:30:00	T	-0.947458	0.505854	257.572	540.768	14.5495	47.5146	0.866626
2014-05-24	1899-12-31 16:00:00	T	-1.08308	0.518662	272.106	562.41	14.2331	48.7655	0.828829
2014-05-24	1899-12-31 16:30:00	T	-0.850233	0.567898	239.428	500.174	13.7233	49.9057	0.784014
2014-05-24	1899-12-31 17:00:00	T	-0.418869	0.481089	121.075	263.55	13.4999	50.7009	0.76043
2014-05-24	1899-12-31 17:30:00	T	-0.293381	0.469845	72.2214	163.574	13.4523	50.8966	0.755065
2014-05-24	1899-12-31 18:00:00	T	-0.133807	0.438424	64.7928	144.403	13.4475	50.647	0.758666
2014-05-24	1899-12-31 18:30:00	T	0.0548605	0.336791	36.8312	84.3195	13.496	49.6071	0.777111
2014-05-24	1899-12-31 19:00:00	F	0.362189	0.304532	18.1206	43.5367	13.5574	48.3255	0.800073
2014-05-24	1899-12-31 19:30:00	F	0.221833	0.184953	9.44099	24.2393	13.5362	48.6961	0.793239
2014-05-24	1899-12-31 20:00:00	F	0.228602	0.124313	1.22691	7.39504	13.3652	50.8232	0.751915
2014-05-24	1899-12-31 20:30:00	F	0.160283	0.0610311	-1.57522	0.61288	13.0977	53.0049	0.70611
2014-05-24	1899-12-31 21:00:00	F	0.238218	0.0659872	-1.59981	-0.00362382	12.7913	55.5802	0.654163
2014-05-24	1899-12-31 21:30:00	F	0.639782	0.0767702	-1.49047	-0.0057983	12.5224	58.6091	0.598894
2014-05-24	1899-12-31 22:00:00	F	-0.224427	0.236974	-1.64226	-0.00893927	12.2677	59.4239	0.577359
2014-05-24	1899-12-31 22:30:00	F	-0.0206215	0.266153	-1.66485	-0.00434889	12.4854	52.9135	0.679677
2014-05-24	1899-12-31 23:00:00	F	0.401219	0.29747	-1.77686	-0.00338247	12.3789	50.7406	0.706092
2014-05-24	1899-12-31 23:30:00	F	0.47508	0.378607	-1.71594	-0.0125635	12.1438	51.2057	0.688693
2014-05-25	1899-12-31	F	0.360022	0.390172	-1.77411	-0.011114	12.1596	48.9086	0.721875
2014-05-25	1899-12-31 00:30:00	F	0.373686	0.461891	-2.42042	-0.0128052	12.0485	48.0263	0.728993
2014-05-25	1899-12-31 01:00:00	F	0.328678	0.449994	-2.55012	-0.00990606	11.6751	48.752	0.701316
2014-05-25	1899-12-31 01:30:00	F	0.898972	0.488649	-1.95172	-0.00773167	11.7708	46.7432	0.733434
2014-05-25	1899-12-31 02:00:00	F	0.249511	0.514922	-1.46913	-0.0118392	11.8993	44.8417	0.766097
2014-05-25	1899-12-31 02:30:00	F	0.694358	0.58452	-1.39055	-0.00652355	12.2026	40.4165	0.844281
2014-05-25	1899-12-31 03:00:00	F	0.54616	0.627772	-1.96271	-0.0108724	12.0838	39.6743	0.848139
2014-05-25	1899-12-31 03:30:00	F	0.185951	0.569517	-3.02856	-0.0224697	11.5776	41.2924	0.798266
2014-05-25	1899-12-31 04:00:00	F	0.34103	0.638704	-2.8778	-0.0212623	11.1392	44.3461	0.735069
2014-05-25	1899-12-31 04:30:00	F	0.491106	0.60267	-2.66935	-0.0200547	10.8855	47.105	0.686947
2014-05-25	1899-12-31 05:00:00	T	0.302912	0.536878	-2.57752	-0.0125649	10.638	49.4196	0.646148
2014-05-25	1899-12-31 05:30:00	T	0.228779	0.517409	-2.52941	0.549492	10.3247	51.5604	0.605997
2014-05-25	1899-12-31 06:00:00	T	0.195668	0.35386	4.98124	16.2257	9.87266	53.9362	0.559099
2014-05-25	1899-12-31 06:30:00	T	-0.420373	0.421689	42.9218	84.9115	9.53182	55.7493	0.52494
2014-05-25	1899-12-31 07:00:00	T	-0.557548	0.551315	135.011	236.396	9.90008	53.9638	0.559791
2014-05-25	1899-12-31 07:30:00	T	-1.13565	0.491676	230.618	400.939	10.7746	47.9646	0.670817
2014-05-25	1899-12-31 08:00:00	T	-0.991423	0.483472	327.157	564.322	12.1984	36.9028	0.893834
2014-05-25	1899-12-31 08:30:00	T	-1.28704	0.597661	492.465	846.912	13.7862	26.8585	1.14955
2014-05-25	1899-12-31 09:00:00	T	-1.38822	0.645715	582.355	1019.56	14.5952	23.4959	1.2671
2014-05-25	1899-12-31 09:30:00	T	-1.55218	0.66439	645.881	1143.98	15.1223	20.3135	1.36544
2014-05-25	1899-12-31 10:00:00	T	-1.33101	0.613952	747.265	1332.58	15.3804	18.1941	1.42519
2014-05-25	1899-12-31 10:30:00	T	-1.85649	0.698899	818.003	1467.89	15.8419	17.5836	1.47893
2014-05-25	1899-12-31 11:00:00	T	-1.17569	0.624429	879.185	1593.08	16.4292	17.1428	1.5436
2014-05-25	1899-12-31 11:30:00	T	-1.48178	0.599149	869.769	1592.25	16.7254	16.5323	1.58454
2014-05-25	1899-12-31 12:00:00	T	-1.12874	0.534848	912.572	1689.45	17.3205	16.8192	1.63978
2014-05-25	1899-12-31 12:30:00	T	-0.496017	0.578299	858.762	1602.83	17.4202	17.3948	1.63872
2014-05-25	1899-12-31 13:00:00	T	-1.44963	0.538637	862.465	1623.31	17.8837	16.8343	1.69877
2014-05-25	1899-12-31 13:30:00	T	-1.27041	0.444575	934.119	1762.4	18.2551	15.1348	1.77444
2014-05-25	1899-12-31 14:00:00	T	-1.48857	0.473642	837.907	1597.47	18.7973	13.8323	1.8639
2014-05-25	1899-12-31 14:30:00	T	-1.15422	0.345364	618.736	1203.53	18.8062	13.4106	1.87408
2014-05-25	1899-12-31 15:00:00	T	-1.01113	0.443203	808.024	1546.71	19.0474	13.0346	1.91078
2014-05-25	1899-12-31 15:30:00	T	-0.65971	0.382409	781.103	1515.98	19.5587	12.4037	1.98688
2014-05-25	1899-12-31 16:00:00	T	-1.11878	0.414111	557.912	1090.17	19.6955	12.2493	2.00736
2014-05-25	1899-12-31 16:30:00	T	-1.90395	0.46059	432.757	856.749	19.4831	12.8177	1.96822
2014-05-25	1899-12-31 17:00:00	T	-1.29483	0.280632	439.45	873.416	19.3241	12.9203	1.94656
2014-05-25	1899-12-31 17:30:00	T	-1.33454	0.329236	285.602	577.794	19.2442	13.1238	1.93238
2014-05-25	1899-12-31 18:00:00	T	-0.345759	0.352657	248.366	505.198	19.279	13.2742	1.93321
2014-05-25	1899-12-31 18:30:00	T	-1.18075	0.335941	168.495	346.851	19.2964	12.9901	1.94165
2014-05-25	1899-12-31 19:00:00	F	-0.745395	0.274269	110.667	220.881	19.0401	12.9368	1.91205
2014-05-25	1899-12-31 19:30:00	F	0.247935	0.28658	51.4721	112.316	18.4394	13.5038	1.82958
2014-05-25	1899-12-31 20:00:00	F	0.122562	0.187231	13.3661	38.9923	16.9697	15.7027	1.6253
2014-05-25	1899-12-31 20:30:00	F	-0.0614654	0.167854	-4.3769	2.97346	15.696	17.7914	1.46148
2014-05-25	1899-12-31 21:00:00	F	-0.0879698	0.141927	-5.92777	-0.0198065	14.3193	19.7995	1.30485
2014-05-25	1899-12-31 21:30:00	F	0.129461	0.134357	-4.51219	-0.0275385	13.8729	19.9849	1.2647
2014-05-25	1899-12-31 22:00:00	F	0.159773	0.121684	-4.30851	-0.0350317	13.8275	19.2777	1.27212
2014-05-25	1899-12-31 22:30:00	F	0.104081	0.090445	-3.8844	-0.0103894	14.0934	18.4719	1.3072
2014-05-25	1899-12-31 23:00:00	F	0.21047	0.131385	-3.60329	-0.0137725	14.0735	18.7049	1.30178
2014-05-25	1899-12-31 23:30:00	F	0.584567	0.138539	-4.55808	-0.0229541	13.5112	20.0993	1.23353
2014-05-26	1899-12-31	F	0.198178	0.159377	-5.30131	-0.0302029	12.0687	22.4849	1.08879
2014-05-26	1899-12-31 00:30:00	F	0.0609381	0.168856	-4.94803	-0.0231972	11.4246	22.8417	1.03864
2014-05-26	1899-12-31 01:00:00	F	0.266964	0.246733	-4.2823	-0.00773293	11.7727	20.7833	1.09118
2014-05-26	1899-12-31 01:30:00	F	0.221406	0.26392	-4.62617	-0.0205409	11.9871	19.9064	1.11898
2014-05-26	1899-12-31 02:00:00	F	0.203052	0.141108	-5.25798	-0.0157075	11.1586	21.751	1.03491
2014-05-26	1899-12-31 02:30:00	F	0.17241	0.178734	-3.93023	-0.00942488	11.32	21.7075	1.04663
2014-05-26	1899-12-31 03:00:00	F	0.333143	0.210595	-4.30338	-0.00580019	11.2634	21.9738	1.03916
2014-05-26	1899-12-31 03:30:00	F	0.323771	0.154204	-4.93025	-0.0132922	10.7162	23.1094	0.987465
2014-05-26	1899-12-31 04:00:00	F	0.0294426	0.145843	-4.56798	-0.00821717	10.5821	23.2477	0.976925
2014-05-26	1899-12-31 04:30:00	F	0.142333	0.141832	-4.69122	-0.00507545	10.0182	24.2169	0.928915
2014-05-26	1899-12-31 05:00:00	T	0.263439	0.279891	-4.64486	-0.00169187	10.0168	24.2604	0.928298
2014-05-26	1899-12-31 05:30:00	T	0.171812	0.265988	-4.65348	1.20075	8.38079	27.8633	0.79181
2014-05-26	1899-12-31 06:00:00	T	0.060081	0.270257	16.2059	30.2063	8.54382	27.3097	0.806758
2014-05-26	1899-12-31 06:30:00	T	-0.261419	0.313333	101.086	151.852	9.28248	26.3524	0.859212
2014-05-26	1899-12-31 07:00:00	T	-0.72186	0.457178	204.905	326.143	11.8005	21.3584	1.08525
2014-05-26	1899-12-31 07:30:00	T	-1.06311	0.479614	318.354	519.981	13.7475	18.5968	1.27621
2014-05-26	1899-12-31 08:00:00	T	-1.07044	0.519743	433.636	722.728	15.4167	16.5911	1.45652
2014-05-26	1899-12-31 08:30:00	T	-0.998422	0.623838	542.38	923.083	16.8167	14.7411	1.62797
2014-05-26	1899-12-31 09:00:00	T	-1.54492	0.645926	639.693	1111.69	17.4509	14.2172	1.70508
2014-05-26	1899-12-31 09:30:00	T	-1.54918	0.605374	711.942	1260.54	19.1484	12.3842	1.93722
2014-05-26	1899-12-31 10:00:00	T	0.809171	0.645386	803.101	1439.57	20.2098	12.1548	2.07457
2014-05-26	1899-12-31 10:30:00	T	-2.03872	0.692174	753.226	1374.06	20.4228	11.9936	2.10591
2014-05-26	1899-12-31 11:00:00	T	-2.75257	0.680512	843.291	1549.78	21.7623	11.1949	2.30716
2014-05-26	1899-12-31 11:30:00	T	-1.43835	0.709723	1000.84	1847.7	22.49	8.93084	2.47323
2014-05-26	1899-12-31 12:00:00	T	-1.25392	0.726218	1036.82	1931.94	23.2031	7.55225	2.62152
2014-05-26	1899-12-31 12:30:00	T	-0.876087	0.696244	1056.34	1981.11	23.679	7.16501	2.70914
2014-05-26	1899-12-31 13:00:00	T	0.0210573	0.722676	1010.65	1905.42	23.9994	6.66075	2.77682
2014-05-26	1899-12-31 13:30:00	T	-0.535418	0.652123	946.434	1796.07	24.4141	6.73875	2.84435
2014-05-26	1899-12-31 14:00:00	T	-1.0272	0.754959	882.078	1682.93	24.4508	6.57465	2.85561
2014-05-26	1899-12-31 14:30:00	T	-0.972093	0.685189	922.686	1770.05	24.7584	6.87392	2.89928
2014-05-26	1899-12-31 15:00:00	T	-0.746526	0.74651	876.436	1691.41	24.4699	8.06628	2.81322
2014-05-26	1899-12-31 15:30:00	T	-0.460486	0.58574	797.29	1541.21	24.721	8.26346	2.84963
2014-05-26	1899-12-31 16:00:00	T	-0.936357	0.672349	621.716	1213.1	24.5422	8.18571	2.82175
2014-05-26	1899-12-31 16:30:00	T	-1.48053	0.693983	535.682	1057.72	24.3254	9.20547	2.75442
2014-05-26	1899-12-31 17:00:00	T	-1.1034	0.712833	535.737	1066.48	24.1174	9.85256	2.70089
2014-05-26	1899-12-31 17:30:00	T	-0.781911	0.678765	425.915	855.797	24.0624	9.69219	2.69679
2014-05-26	1899-12-31 18:00:00	T	-0.931326	0.670934	300.5	608.985	23.6754	9.76246	2.63274
2014-05-26	1899-12-31 18:30:00	T	-0.683038	0.66918	209.513	421.233	23.5355	9.55167	2.61675
2014-05-26	1899-12-31 19:00:00	F	-0.464763	0.595	125.962	248.623	23.2052	9.69961	2.56092
2014-05-26	1899-12-31 19:30:00	F	0.0545339	0.507944	59.1173	117.729	22.6561	9.64576	2.47868
2014-05-26	1899-12-31 20:00:00	F	0.275535	0.438266	14.1083	38.1074	21.9208	9.9386	2.36256
2014-05-26	1899-12-31 20:30:00	F	0.302509	0.283428	-5.15518	3.3211	20.8215	10.6993	2.19003
2014-05-26	1899-12-31 21:00:00	F	0.247069	0.276781	-6.55478	-0.0164184	19.6935	11.0291	2.03503
2014-05-26	1899-12-31 21:30:00	F	0.244816	0.263095	-6.37984	-0.0625366	18.7981	11.7137	1.90985
2014-05-26	1899-12-31 22:00:00	F	0.232396	0.309797	-6.33334	-0.044915	17.742	13.0094	1.76114
2014-05-26	1899-12-31 22:30:00	F	0.240245	0.313928	-5.95023	-0.023667	17.4253	12.98	1.72688
2014-05-26	1899-12-31 23:00:00	F	0.297108	0.349369	-5.86553	-0.0239102	17.0791	12.8333	1.69233
2014-05-26	1899-12-31 23:30:00	F	0.0791007	0.321496	-5.93449	-0.034297	16.4198	13.552	1.60955
2014-05-27	1899-12-31	F	0.313521	0.261394	-6.28244	-0.0352647	13.5537	17.7243	1.27372
2014-05-27	1899-12-31 00:30:00	F	0.363707	0.304408	-4.00794	-0.0258476	14.8926	15.5523	1.4258
2014-05-27	1899-12-31 01:00:00	F	0.43563	0.280923	-5.39944	-0.0118375	13.4872	16.9323	1.28043
2014-05-27	1899-12-31 01:30:00	F	0.403589	0.341663	-3.84233	-0.0241595	14.5938	14.5247	1.41559
2014-05-27	1899-12-31 02:00:00	F	0.441159	0.344765	-5.10696	-0.0120797	13.5754	15.2774	1.31347
2014-05-27	1899-12-31 02:30:00	F	0.503379	0.410273	-4.08836	-0.0132879	13.6159	14.8687	1.32329
2014-05-27	1899-12-31 03:00:00	F	0.580891	0.460619	-4.59783	-0.0157041	13.7495	14.3544	1.3429
2014-05-27	1899-12-31 03:30:00	F	0.487917	0.493222	-4.37161	-0.00893921	13.3703	15.1053	1.29866
2014-05-27	1899-12-31 04:00:00	F	0.36518	0.438246	-4.45668	-0.00773127	12.8942	16.0918	1.24426
2014-05-27	1899-12-31 04:30:00	F	0.28459	0.423238	-4.01459	-0.0101475	12.8885	16.2176	1.24193
2014-05-27	1899-12-31 05:00:00	T	0.358313	0.402052	-4.22504	-0.0038658	13.283	15.6764	1.2826
2014-05-27	1899-12-31 05:30:00	T	0.30929	0.412249	-3.30234	1.33804	13.3053	15.7536	1.28329
2014-05-27	1899-12-31 06:00:00	T	0.249846	0.370603	10.5354	27.2393	12.9339	16.4524	1.24214
2014-05-27	1899-12-31 06:30:00	T	-0.124818	0.390155	58.4042	107.372	13.321	16.5344	1.2727
2014-05-27	1899-12-31 07:00:00	T	-0.699045	0.422327	141.056	243.827	14.2779	15.6416	1.36885
2014-05-27	1899-12-31 07:30:00	T	-1.21655	0.502547	244.804	419.487	15.7872	13.7129	1.54299
2014-05-27	1899-12-31 08:00:00	T	-1.4371	0.533857	350.422	605.131	16.916	13.1894	1.66808
2014-05-27	1899-12-31 08:30:00	T	-1.42499	0.56171	466.526	812.695	17.9725	12.656	1.79414
2014-05-27	1899-12-31 09:00:00	T	-1.78564	0.568635	574.097	1016.41	19.3702	13.538	1.9383
2014-05-27	1899-12-31 09:30:00	T	-1.39411	0.501086	675.795	1212.94	20.8487	13.4724	2.12555
2014-05-27	1899-12-31 10:00:00	T	-1.84926	0.521096	770.795	1400.09	22.1022	13.7739	2.28708
2014-05-27	1899-12-31 10:30:00	T	-1.86552	0.438385	840.554	1541.73	22.9008	14.1371	2.3906
2014-05-27	1899-12-31 11:00:00	T	-0.743311	0.311632	912.054	1688.46	23.4069	14.6764	2.44936
2014-05-27	1899-12-31 11:30:00	T	-1.28191	0.439262	951.665	1776.09	23.9811	14.4089	2.54343
2014-05-27	1899-12-31 12:00:00	T	-0.841594	0.416299	957.414	1805.68	24.5737	13.84	2.65287
2014-05-27	1899-12-31 12:30:00	T	-1.09744	0.282189	987.514	1878.88	24.8109	13.3177	2.70705
2014-05-27	1899-12-31 13:00:00	T	-0.816336	0.338458	998.418	1908.25	25.1462	12.784	2.77869
2014-05-27	1899-12-31 13:30:00	T	-1.09938	0.411538	981.689	1886.91	25.3977	12.4576	2.83112
2014-05-27	1899-12-31 14:00:00	T	-0.555246	0.355531	965.671	1871.91	25.6992	12.0746	2.89484
2014-05-27	1899-12-31 14:30:00	T	-1.21859	0.489522	931.38	1807.16	26.1181	11.3563	2.99174
2014-05-27	1899-12-31 15:00:00	T	-1.00679	0.286945	834.461	1635.14	25.9054	11.7145	2.94241
2014-05-27	1899-12-31 15:30:00	T	-0.810509	0.441895	816.095	1603.01	26.0408	11.2055	2.98317
2014-05-27	1899-12-31 16:00:00	T	-0.456273	0.481218	711.914	1408.01	26.1669	11.4096	2.99858
2014-05-27	1899-12-31 16:30:00	T	-2.10069	0.381753	592.2	1191.31	26.0392	12.2262	2.94859
2014-05-27	1899-12-31 17:00:00	T	-0.913895	0.229086	454.57	928.236	25.8777	12.5605	2.90942
2014-05-27	1899-12-31 17:30:00	T	-1.26711	0.313606	408.499	841.79	26.061	12.5541	2.94135
2014-05-27	1899-12-31 18:00:00	T	-1.45273	0.501033	293.933	615.078	25.6416	12.7081	2.86417
2014-05-27	1899-12-31 18:30:00	T	-0.969015	0.361876	176.999	369.489	25.8014	13.2594	2.87315
2014-05-27	1899-12-31 19:00:00	F	-0.478527	0.282061	121.484	251.624	25.5304	13.3197	2.82539
2014-05-27	1899-12-31 19:30:00	F	-0.000318937	0.208786	59.6397	122.77	24.8914	14.008	2.6984
2014-05-27	1899-12-31 20:00:00	F	-0.224745	0.0952419	15.304	41.2804	23.8224	15.5061	2.48698
2014-05-27	1899-12-31 20:30:00	F	0.118557	0.0744246	-4.01278	2.92144	22.6741	16.9543	2.28058
2014-05-27	1899-12-31 21:00:00	F	0.281617	0.0959979	-4.04374	-0.0239006	22.1416	16.7347	2.21381
2014-05-27	1899-12-31 21:30:00	F	0.181718	0.224115	-3.38168	-0.0683244	21.9036	16.4949	2.18821
2014-05-27	1899-12-31 22:00:00	F	-0.00739787	0.0488696	-2.0182	-0.0712269	23.0284	15.182	2.37981
2014-05-27	1899-12-31 22:30:00	F	0.0077269	0.0352101	-2.31049	-0.0555338	23.2898	14.6186	2.43376
2014-05-27	1899-12-31 23:00:00	F	0.013853	0.0848805	-2.35143	-0.0589142	22.2692	15.1	2.27489
2014-05-27	1899-12-31 23:30:00	F	0.105509	0.155867	-3.32819	-0.0507042	21.7053	15.8872	2.17762
2014-05-28	1899-12-31	F	0.371029	0.19429	-3.26514	-0.0601205	21.467	16.2831	2.136
2014-05-28	1899-12-31 00:30:00	F	0.125653	0.194081	-3.91926	-0.0548086	20.8871	17.0175	2.04326
2014-05-28	1899-12-31 01:00:00	F	0.220621	0.182798	-3.69453	-0.0654335	20.2437	17.993	1.94071
2014-05-28	1899-12-31 01:30:00	F	0.124904	0.170525	-3.80884	-0.0673683	19.9491	18.3674	1.89695
2014-05-28	1899-12-31 02:00:00	F	0.0590624	0.124097	-3.51733	-0.0632667	19.6809	18.5181	1.86223
2014-05-28	1899-12-31 02:30:00	F	0.331184	0.16516	-2.92466	-0.0647194	19.4636	18.4464	1.83887
2014-05-28	1899-12-31 03:00:00	F	0.344215	0.0909546	-2.23428	-0.0538537	19.9558	17.8348	1.91012
2014-05-28	1899-12-31 03:30:00	F	0.260258	0.111393	-3.60916	-0.0538531	19.7177	17.7698	1.88363
2014-05-28	1899-12-31 04:00:00	F	0.458434	0.169992	-4.32594	-0.0415365	18.097	20.3923	1.64803
2014-05-28	1899-12-31 04:30:00	F	0.379989	0.183944	-3.22264	-0.0437115	18.4453	19.3152	1.70725
2014-05-28	1899-12-31 05:00:00	T	0.459058	0.153839	-3.71984	-0.0316374	18.5579	18.9882	1.7263
2014-05-28	1899-12-31 05:30:00	T	0.544479	0.158469	-3.07434	1.22036	18.2151	19.397	1.68106
2014-05-28	1899-12-31 06:00:00	T	0.244238	0.236808	13.2442	28.8528	18.2611	20.4396	1.66411
2014-05-28	1899-12-31 06:30:00	T	-0.314825	0.275997	76.4324	131.983	18.3257	21.5921	1.64666
2014-05-28	1899-12-31 07:00:00	T	-0.650361	0.232834	141.646	248.075	18.367	22.7237	1.62709
2014-05-28	1899-12-31 07:30:00				298.796	508.863			0
2014-05-28	1899-12-31 08:00:00				395.439	697.636			0
2014-05-28	1899-12-31 08:30:00	T	-1.0269	0.418807	395.971	721.935	22.6614	13.3461	2.37789
2014-05-28	1899-12-31 09:00:00	T	-1.43799	0.431098	482.886	880.622	23.4954	12.3343	2.5301
2014-05-28	1899-12-31 09:30:00	T	-1.12761	0.478499	683.274	1233.37	24.643	10.8312	2.75695
2014-05-28	1899-12-31 10:00:00	T	-0.962346	0.433005	783.699	1425.29	25.4813	10.3983	2.91217
2014-05-28	1899-12-31 10:30:00	T	-1.52106	0.471959	824.347	1516.1	26.2487	9.23297	3.08716
2014-05-28	1899-12-31 11:00:00	T	-1.02277	0.434274	884.159	1643.89	26.773	8.82953	3.19816
2014-05-28	1899-12-31 11:30:00	T	-0.926564	0.345454	870.785	1640	27.0397	8.40817	3.26365
2014-05-28	1899-12-31 12:00:00	T	-1.41678	0.464004	860.537	1640.94	27.4532	7.26034	3.3856
2014-05-28	1899-12-31 12:30:00	T	-0.845441	0.543399	809.918	1552.55	27.6294	7.15632	3.42448
2014-05-28	1899-12-31 13:00:00	T	-1.4832	0.574977	851.784	1638.79	27.9027	6.58462	3.50097
2014-05-28	1899-12-31 13:30:00	T	-1.38686	0.276451	793.05	1544.76	27.9165	6.26268	3.51585
2014-05-28	1899-12-31 14:00:00	T	-1.13962	0.384925	806.458	1576.91	28.0963	6.42189	3.54685
2014-05-28	1899-12-31 14:30:00	T	-1.14967	0.271928	667.192	1314.33	27.9281	6.55936	3.50711
2014-05-28	1899-12-31 15:00:00	T	-1.24696	0.229443	706.993	1395.63	28.1796	6.29274	3.56899
2014-05-28	1899-12-31 15:30:00	T	-0.737268	0.362282	631.581	1252.61	28.3774	6.19277	3.6141
2014-05-28	1899-12-31 16:00:00	T	-0.786464	0.274643	487.283	980.04	28.2989	6.34851	3.5917
2014-05-28	1899-12-31 16:30:00	T	-0.952853	0.319441	504.057	1018.45	28.3256	6.50672	3.59119
2014-05-28	1899-12-31 17:00:00	T	-1.32052	0.219013	555.834	1133.95	28.5987	6.5734	3.64596
2014-05-28	1899-12-31 17:30:00	T	-0.621343	0.459738	395.156	807.036	28.7137	6.6175	3.6686
2014-05-28	1899-12-31 18:00:00	T	-0.535285	0.254091	206.54	431.845	28.4466	6.69084	3.6094
2014-05-28	1899-12-31 18:30:00	T	-0.185501	0.294864	142.384	299.021	28.2232	7.34374	3.5379
2014-05-28	1899-12-31 19:00:00	F	-0.200378	0.390623	107.303	221.713	27.7862	8.02336	3.42369
2014-05-28	1899-12-31 19:30:00	F	-0.0749003	0.349219	67.8258	140.666	27.2057	8.03815	3.30891
2014-05-28	1899-12-31 20:00:00	F	-0.132306	0.274593	13.8712	41.7918	26.1032	7.99852	3.10239
2014-05-28	1899-12-31 20:30:00	F	0.103037	0.144545	-4.98534	3.94531	25.0704	8.55297	2.90045
2014-05-28	1899-12-31 21:00:00	F	0.15122	0.286767	-4.83706	-0.0108639	24.7593	8.72603	2.84174
2014-05-28	1899-12-31 21:30:00	F	0.238495	0.107516	-2.32009	-0.0755573	24.3954	8.93034	2.77438
2014-05-28	1899-12-31 22:00:00	F	-1.07473	0.0959666	-4.0257	-0.0659084	23.3285	10.3009	2.56288
2014-05-28	1899-12-31 22:30:00	F	0.299192	0.331748	-4.84725	-0.0369391	22.4988	15.0377	2.30856
2014-05-28	1899-12-31 23:00:00	F	0.476612	0.316999	-5.04559	-0.0478029	21.7336	17.9953	2.12668
2014-05-28	1899-12-31 23:30:00	F	0.502236	0.38252	-5.03523	-0.0405606	21.2416	19.3601	2.02924
2014-05-29	1899-12-31	F	0.707234	0.425988	-4.86547	-0.042976	20.7571	20.2684	1.94753
2014-05-29	1899-12-31 00:30:00	F	0.593312	0.4374	-4.64789	-0.041046	20.6397	20.4294	1.92959
2014-05-29	1899-12-31 01:00:00	F	0.639218	0.500628	-4.36966	-0.0398393	20.6255	20.1968	1.93355
2014-05-29	1899-12-31 01:30:00	F	0.676113	0.514669	-4.44389	-0.039598	20.8034	19.8062	1.96442
2014-05-29	1899-12-31 02:00:00	F	0.587237	0.548509	-4.38421	-0.0362175	21.2096	20.7017	1.99155
2014-05-29	1899-12-31 02:30:00	F	0.508687	0.483565	-4.74153	-0.0301807	21.125	21.627	1.95811
2014-05-29	1899-12-31 03:00:00	F	0.610634	0.443023	-4.61989	-0.046357	20.3109	22.8792	1.83262
2014-05-29	1899-12-31 03:30:00	F	0.386175	0.35503	-4.30864	-0.0437026	19.8718	23.5092	1.76892
2014-05-29	1899-12-31 04:00:00	F	0.536591	0.286612	-4.23478	-0.0468434	19.3383	24.3624	1.69218
2014-05-29	1899-12-31 04:30:00	F	0.499742	0.337369	-3.93841	-0.0560215	18.901	25.1737	1.62901
2014-05-29	1899-12-31 05:00:00	T	0.455324	0.31428	-3.90515	-0.0287363	19.098	24.8572	1.65614
2014-05-29	1899-12-31 05:30:00	T	0.496851	0.313115	-2.37543	1.83265	19.2259	24.7595	1.67156
2014-05-29	1899-12-31 06:00:00	T	0.177651	0.271506	26.4269	45.6543	18.7693	25.8649	1.60073
2014-05-29	1899-12-31 06:30:00	T	-0.407699	0.228454	94.9936	158.52	18.4717	27.2517	1.54179
2014-05-29	1899-12-31 07:00:00	T	-0.92716	0.300005	155.51	271.875	19.5179	26.4164	1.6647
2014-05-29	1899-12-31 07:30:00	T	-1.17908	0.406029	276.067	480.812	20.9615	24.2546	1.87352
2014-05-29	1899-12-31 08:00:00	T	-1.35525	0.436807	369.025	655.699	22.2702	22.5265	2.07591
2014-05-29	1899-12-31 08:30:00	T	-1.33294	0.439289	446.379	803.987	23.1204	21.4774	2.21536
2014-05-29	1899-12-31 09:00:00	T	-1.39247	0.481242	601.608	1079.95	24.2004	19.2505	2.43124
2014-05-29	1899-12-31 09:30:00	T	-0.304438	0.354927	668.409	1221.51	25.0095	18.2382	2.58369
2014-05-29	1899-12-31 10:00:00	T	-0.295288	0.247094	782.75	1440.33	26.4563	15.5458	2.90769
2014-05-29	1899-12-31 10:30:00	T	-0.837724	0.244631	850.481	1576.44	27.0475	12.95	3.10315
2014-05-29	1899-12-31 11:00:00	T	-0.752746	0.215653	919.459	1722.91	27.9592	10.6192	3.36073
2014-05-29	1899-12-31 11:30:00	T	-1.0944	0.245402	911.173	1729.04	28.5487	9.41935	3.5246
2014-05-29	1899-12-31 12:00:00	T	-0.867507	0.429815	978.08	1869.12	29.0444	8.38329	3.66873
2014-05-29	1899-12-31 12:30:00	T	-0.246067	0.559783	955.952	1840.57	29.4874	7.94462	3.78173
2014-05-29	1899-12-31 13:00:00	T	-0.634357	0.479308	894.842	1732.96	29.6234	6.84248	3.85713
2014-05-29	1899-12-31 13:30:00	T	-1.19016	0.403825	883.146	1712	29.5329	6.80375	3.83867
2014-05-29	1899-12-31 14:00:00	T	-1.12155	0.304092	886.414	1736	29.6535	6.85542	3.86328
2014-05-29	1899-12-31 14:30:00	T	-1.12043	0.38986	673.182	1331.56	29.7423	6.60652	3.89344
2014-05-29	1899-12-31 15:00:00	T	-1.30283	0.313141	722.716	1426.57	29.6847	6.33652	3.89179
2014-05-29	1899-12-31 15:30:00	T	-1.22158	0.304284	750.341	1489.7	30.0513	6.25847	3.97791
2014-05-29	1899-12-31 16:00:00	T	-1.1698	0.267763	687.171	1378.21	29.6104	6.33404	3.87528
2014-05-29	1899-12-31 16:30:00	T	-0.754784	0.316686	665.657	1347.3	29.8607	6.20168	3.93702
2014-05-29	1899-12-31 17:00:00	T	-1.02555	0.358261	522.271	1070.72	29.9835	6.16856	3.96626
2014-05-29	1899-12-31 17:30:00	T	-1.05315	0.216808	384.109	796.557	29.8913	6.23037	3.94273
2014-05-29	1899-12-31 18:00:00	T	-1.06252	0.163803	324.784	680.095	29.8298	6.19913	3.93013
2014-05-29	1899-12-31 18:30:00	T	-0.334412	0.165448	129.856	277.357	29.6691	6.312	3.8893
2014-05-29	1899-12-31 19:00:00	F	-0.0716863	0.10296	105.142	221.641	29.5046	6.14295	3.85961
2014-05-29	1899-12-31 19:30:00	F	-0.0775762	0.090737	43.2013	99.5601	29.1162	6.73318	3.75038
2014-05-29	1899-12-31 20:00:00	F	0.0198979	0.0508738	10.0834	28.6583	28.3936	7.43058	3.56975
2014-05-29	1899-12-31 20:30:00	F	0.934819	0.302423	-3.0899	2.52617	27.1373	10.0822	3.22236
2014-05-29	1899-12-31 21:00:00	F	0.491776	0.397519	-4.76894	-0.019789	26.3361	13.7274	2.94937
2014-05-29	1899-12-31 21:30:00	F	0.568395	0.282011	-4.33445	-0.0576793	25.7208	14.3748	2.82266
2014-05-29	1899-12-31 22:00:00	F	0.345197	0.290548	-3.92742	-0.0610604	24.9448	17.0961	2.60973
2014-05-29	1899-12-31 22:30:00	F	0.455215	0.283663	-3.45813	-0.057443	24.5299	19.6015	2.46889
2014-05-29	1899-12-31 23:00:00	F	0.744089	0.351548	-3.57554	-0.0489972	24.244	20.3201	2.4053
2014-05-29	1899-12-31 23:30:00	F	0.523552	0.366938	-4.15613	-0.0538263	23.6643	21.0967	2.30034
2014-05-30	1899-12-31	F	0.44339	0.302934	-3.98999	-0.0492421	23.0022	22.5785	2.16871
2014-05-30	1899-12-31 00:30:00	F	0.657224	0.356188	-3.25882	-0.0538305	23.1276	22.0162	2.20111
2014-05-30	1899-12-31 01:00:00	F	0.551935	0.281767	-3.93985	-0.0499695	22.7429	20.9681	2.17937
2014-05-30	1899-12-31 01:30:00	F	0.318951	0.279304	-3.76811	-0.0591439	21.9386	22.246	2.04177
2014-05-30	1899-12-31 02:00:00	F	0.503648	0.293494	-3.44035	-0.0567326	21.6276	21.9674	2.01056
2014-05-30	1899-12-31 02:30:00	F	0.481833	0.301344	-3.44647	-0.0429737	21.668	21.1062	2.03778
2014-05-30	1899-12-31 03:00:00	F	0.347278	0.293843	-3.88322	-0.0490099	21.2807	21.1406	1.98917
2014-05-30	1899-12-31 03:30:00	F	0.653042	0.306396	-3.72816	-0.0598756	20.476	23.0768	1.84663
2014-05-30	1899-12-31 04:00:00	F	0.60463	0.287234	-3.04693	-0.0509449	20.4959	23.8161	1.83112
2014-05-30	1899-12-31 04:30:00	F	0.50067	0.295587	-2.89395	-0.0453929	21.0499	23.7006	1.8975
2014-05-30	1899-12-31 05:00:00	T	0.468616	0.322152	-3.1388	-0.0383903	21.4879	21.6919	2.00049
2014-05-30	1899-12-31 05:30:00	T	0.548957	0.387781	-2.91653	0.86266	21.8982	19.9866	2.09597
2014-05-30	1899-12-31 06:00:00	T	0.425028	0.388478	6.68935	18.9781	22.1515	18.7184	2.16233
2014-05-30	1899-12-31 06:30:00	T	0.153386	0.340172	37.9585	77.116	21.8103	19.8302	2.08883
2014-05-30	1899-12-31 07:00:00	T	-0.229962	0.28497	95.8764	188.886	21.9141	20.4229	2.08656
2014-05-30	1899-12-31 07:30:00	T	-0.407748	0.240965	148.177	292.987	22.4823	19.9809	2.17199
2014-05-30	1899-12-31 08:00:00	T	-1.0884	0.221483	234.798	458.022	23.4093	19.5922	2.3085
2014-05-30	1899-12-31 08:30:00	T	-1.55904	0.242663	348.641	668.44	24.5304	17.122	2.54517
2014-05-30	1899-12-31 09:00:00	T	-1.5378	0.300794	378.646	725.461	25.1826	15.7022	2.69148
2014-05-30	1899-12-31 09:30:00	T	-0.301954	0.325021	442.724	843.986	25.2304	17.6178	2.63776
2014-05-30	1899-12-31 10:00:00	T	-1.29962	0.40562	637.565	1201.5	26.0798	15.107	2.8586
2014-05-30	1899-12-31 10:30:00	T	-2.11195	0.455019	639.518	1217.45	26.1521	16.3088	2.83017
2014-05-30	1899-12-31 11:00:00	T	-1.63316	0.492983	775.172	1479.68	26.728	15.8605	2.94356
2014-05-30	1899-12-31 11:30:00	T	-2.0305	0.523646	581.776	1135.12	26.8213	13.5245	3.04199
2014-05-30	1899-12-31 12:00:00	T	-1.39784	0.630161	742.158	1443.32	27.4009	11.5985	3.21729
2014-05-30	1899-12-31 12:30:00	T	-1.29475	0.664023	834.128	1621.61	27.5947	12.5838	3.21765
2014-05-30	1899-12-31 13:00:00	T	-1.50729	0.618028	625.658	1242.43	27.7272	13.2024	3.21967
2014-05-30	1899-12-31 13:30:00	T	-1.06823	0.678264	470.065	946.476	27.5274	11.8736	3.23107
2014-05-30	1899-12-31 14:00:00	T	-0.603178	0.678665	449.523	911.609	27.2813	12.3642	3.16714
2014-05-30	1899-12-31 14:30:00	T	-1.0752	0.701939	411.127	838.529	27.4119	12.9765	3.16913
2014-05-30	1899-12-31 15:00:00	T	-0.794875	0.676231	442.508	899.417	27.0384	13.1272	3.09516
2014-05-30	1899-12-31 15:30:00	T	-1.08024	0.724091	635.249	1266.39	27.3275	11.619	3.20275
2014-05-30	1899-12-31 16:00:00	T	-1.33833	0.757196	575.236	1158.11	27.2536	10.863	3.21621
2014-05-30	1899-12-31 16:30:00	T	-0.80527	0.718533	476.752	960.498	26.9995	11.6355	3.14117
2014-05-30	1899-12-31 17:00:00	T	0.987748	0.69396	387.143	793.152	26.7086	12.5238	3.05689
2014-05-30	1899-12-31 17:30:00	T	-0.456495	0.658165	263.19	543.297	26.5408	12.915	3.01329
2014-05-30	1899-12-31 18:00:00	T	-0.0163437	0.606433	231.901	477.144	25.9677	16.0086	2.80954
2014-05-30	1899-12-31 18:30:00	T	0.094169	0.611993	129.178	268.467	25.5504	18.1937	2.66958
2014-05-30	1899-12-31 19:00:00	F	0.278992	0.567514	64.468	137.215	25.0759	19.5045	2.55371
2014-05-30	1899-12-31 19:30:00	F	0.636788	0.485737	26.1324	59.887	24.6001	22.2024	2.399
2014-05-30	1899-12-31 20:00:00	F	0.86073	0.480534	7.45353	20.4086	24.1464	24.6998	2.25971
2014-05-30	1899-12-31 20:30:00	F	0.645115	0.506751	-1.90999	2.4172	23.6529	28.2862	2.08914
2014-05-30	1899-12-31 21:00:00	F	0.849462	0.52307	-2.99749	-0.00820725	23.3199	28.0046	2.05568
2014-05-30	1899-12-31 21:30:00	F	0.368358	0.505484	-4.03601	-0.0572079	22.6309	24.1244	2.07811
2014-05-30	1899-12-31 22:00:00	F	0.44433	0.446144	-3.91687	-0.060108	21.7908	24.9309	1.95353
2014-05-30	1899-12-31 22:30:00	F	0.511008	0.384263	-4.3159	-0.0678378	20.9241	28.32	1.76883
2014-05-30	1899-12-31 23:00:00	F	0.480037	0.351287	-4.29528	-0.0632555	20.398	31.921	1.62635
2014-05-30	1899-12-31 23:30:00	F	0.413861	0.289386	-4.58619	-0.0637429	19.7888	33.1168	1.53868
2014-05-31	1899-12-31	F	0.315329	0.186388	-4.79013	-0.0581931	18.7945	35.0306	1.40493
2014-05-31	1899-12-31 00:30:00	F	0.169418	0.0998741	-3.94736	-0.0661668	18.4825	34.6617	1.38561
2014-05-31	1899-12-31 01:00:00	F	0.116289	0.105871	-3.51519	-0.0664133	17.8882	35.5219	1.31728
2014-05-31	1899-12-31 01:30:00	F	0.125162	0.157565	-3.4438	-0.0637609	16.9907	37.2653	1.21104
2014-05-31	1899-12-31 02:00:00	F	0.0858684	0.229183	-3.27699	-0.0618325	16.503	37.7342	1.16533
2014-05-31	1899-12-31 02:30:00	F	0.269007	0.300792	-2.66074	-0.0565206	16.3231	39.6832	1.11599
2014-05-31	1899-12-31 03:00:00	F	0.246175	0.309097	-3.08449	-0.0528981	15.9289	43.0456	1.02758
2014-05-31	1899-12-31 03:30:00	F	0.316762	0.380344	-2.98727	-0.0483097	15.7999	42.928	1.02125
2014-05-31	1899-12-31 04:00:00	F	0.579732	0.433549	-2.77852	-0.0442042	15.7995	43.2474	1.0155
2014-05-31	1899-12-31 04:30:00	F	0.34206	0.462785	-2.90816	-0.0485519	16.0765	43.5404	1.0283
2014-05-31	1899-12-31 05:00:00	T	0.280268	0.47241	-3.14926	-0.0359911	15.7203	44.8296	0.982192
2014-05-31	1899-12-31 05:30:00	T	0.274102	0.48135	-2.19478	1.29666	15.6055	45.3471	0.965845
2014-05-31	1899-12-31 06:00:00	T	0.222369	0.489585	9.89889	24.7765	15.4761	46.0985	0.944699
2014-05-31	1899-12-31 06:30:00	T	-0.157277	0.506438	55.2992	107.18	15.2911	46.7342	0.922537
2014-05-31	1899-12-31 07:00:00	T	-0.555302	0.51936	141.536	257.72	15.8822	45.1671	0.986338
2014-05-31	1899-12-31 07:30:00	T	-0.89402	0.609005	249.359	455.899	16.6464	43.2647	1.0715
2014-05-31	1899-12-31 08:00:00	T	-1.24089	0.694116	325.924	603.343	17.279	42.4143	1.13206
2014-05-31	1899-12-31 08:30:00	T	-0.80145	0.732997	466.225	861.669	18.5225	38.7284	1.30258
2014-05-31	1899-12-31 09:00:00	T	-1.69066	0.717758	560.56	1046.22	19.6843	35.0462	1.48461
2014-05-31	1899-12-31 09:30:00	T	-2.14214	0.720052	574.667	1087.82	20.312	33.8694	1.57141
2014-05-31	1899-12-31 10:00:00	T	-1.07307	0.65587	544.842	1047.6	21.0399	33.1728	1.66077
2014-05-31	1899-12-31 10:30:00	T	-1.89027	0.650222	679.145	1294.93	21.8489	33.8355	1.72776
2014-05-31	1899-12-31 11:00:00	T	-2.03922	0.647405	754.395	1443.32	22.4444	34.2881	1.77927
2014-05-31	1899-12-31 11:30:00	T	-1.28987	0.552466	703.921	1371.07	23.2926	30.7481	1.97403
2014-05-31	1899-12-31 12:00:00	T	-1.58809	0.47545	750.091	1455.08	24.1268	28.4802	2.14365
2014-05-31	1899-12-31 12:30:00	T	-1.27771	0.463147	998.942	1942.44	24.6214	26.9032	2.25678
2014-05-31	1899-12-31 13:00:00	T	-1.09625	0.426224	808.6	1598.23	24.9386	26.3342	2.31782
2014-05-31	1899-12-31 13:30:00	T	-0.969141	0.418273	985.427	1948.24	25.2457	25.6204	2.38348
2014-05-31	1899-12-31 14:00:00	T	-1.3355	0.370634	776.782	1550.99	25.1186	24.8454	2.39019
2014-05-31	1899-12-31 14:30:00	T	-1.31146	0.451755	653.028	1314.31	25.4064	25.3834	2.41402
2014-05-31	1899-12-31 15:00:00	T	-1.25287	0.42275	557.065	1129.7	25.564	24.4435	2.46744
2014-05-31	1899-12-31 15:30:00	T	-1.5259	0.25856	534.001	1086.26	25.6221	24.8198	2.46361
2014-05-31	1899-12-31 16:00:00	T	-1.12076	0.381557	732.308	1477.93	26.1831	24.3861	2.56144
2014-05-31	1899-12-31 16:30:00	T	-0.641807	0.298342	628.127	1288.94	26.0565	24.1922	2.54889
2014-05-31	1899-12-31 17:00:00	T	-1.02655	0.407679	528.189	1092.82	26.6275	23.8365	2.64854
2014-05-31	1899-12-31 17:30:00	T	-1.00748	0.375571	426.542	892.598	26.3204	25.6773	2.53814
2014-05-31	1899-12-31 18:00:00	T	-1.03853	0.405773	317.834	678.785	26.1212	27.0909	2.4607
2014-05-31	1899-12-31 18:30:00	T	-0.70178	0.284081	220.343	479.014	25.9426	27.5537	2.4194
2014-05-31	1899-12-31 19:00:00	F	-0.673344	0.318975	135.546	281.808	25.7638	28.5079	2.36236
2014-05-31	1899-12-31 19:30:00	F	0.0953747	0.345251	64.655	136.298	25.2798	30.338	2.23667
2014-05-31	1899-12-31 20:00:00	F	0.0877176	0.391867	17.4462	45.0197	24.3933	33.438	2.027
2014-05-31	1899-12-31 20:30:00	F	0.237448	0.476763	-2.1986	4.95346	23.5318	36.8592	1.82581
2014-05-31	1899-12-31 21:00:00	F	0.540008	0.490305	-4.16207	0.00989541	22.7902	40.0637	1.65714
2014-05-31	1899-12-31 21:30:00	F	0.424645	0.518525	-4.08101	-0.029933	22.0704	43.0564	1.50698
2014-05-31	1899-12-31 22:00:00	F	0.433364	0.445422	-3.94591	-0.0328321	21.4797	46.1859	1.37367
2014-05-31	1899-12-31 22:30:00	F	0.451194	0.496151	-3.97008	-0.0321095	21.1496	48.0142	1.3004
2014-05-31	1899-12-31 23:00:00	F	0.50048	0.417213	-3.96735	-0.0408025	20.8673	49.5789	1.23956
2014-05-31	1899-12-31 23:30:00	F	0.505333	0.443636	-3.82077	-0.0350092	20.4202	51.4397	1.16137
2014-06-01	1899-12-31	F	0.433219	0.43657	-3.84434	-0.0321133	19.9398	52.9982	1.09119
2014-06-01	1899-12-31 00:30:00	F	0.465381	0.380045	-3.85325	-0.0268023	19.296	55.8101	0.985696
2014-06-01	1899-12-31 01:00:00	F	0.5078	0.282592	-4.25617	-0.036704	18.6161	61.3976	0.825243
2014-06-01	1899-12-31 01:30:00	F	0.362713	0.224302	-3.69317	-0.048781	18.0013	66.9921	0.678912
2014-06-01	1899-12-31 02:00:00	F	0.414409	0.182133	-3.66688	-0.0548219	17.5806	69.726	0.606388
2014-06-01	1899-12-31 02:30:00	F	0.463199	0.192806	-3.52326	-0.0678671	17.2203	71.9367	0.549452
2014-06-01	1899-12-31 03:00:00	F	0.493826	0.164256	-3.71268	-0.0789801	16.7844	74.036	0.494498
2014-06-01	1899-12-31 03:30:00	F	0.205913	0.134442	-3.86531	-0.0789825	16.3935	75.6256	0.452829
2014-06-01	1899-12-31 04:00:00	F	0.164576	0.0468309	-2.55548	-0.103143	15.889	78.3797	0.388937
2014-06-01	1899-12-31 04:30:00	F	0.334774	0.159386	-2.64586	-0.106532	15.3825	81.7298	0.318173
2014-06-01	1899-12-31 05:00:00	T	0.1991	0.0660426	-2.59931	-0.110641	14.7467	84.6095	0.257282
2014-06-01	1899-12-31 05:30:00	T	0.156063	0.0461267	-2.45333	1.52416	14.4863	85.7027	0.235022
2014-06-01	1899-12-31 06:00:00	T	0.0460878	0.10305	13.5448	28.2187	14.7341	84.8347	0.253311
2014-06-01	1899-12-31 06:30:00	T	-0.200815	0.114367	66.7017	114.921	14.2647	86.7771	0.214268
2014-06-01	1899-12-31 07:00:00	T	-0.437111	0.10465	155.053	264.628	15.7022	80.8907	0.339675
2014-06-01	1899-12-31 07:30:00	T	-1.19755	0.159282	257.173	447.63	17.6418	71.9171	0.564656
2014-06-01	1899-12-31 08:00:00	T	-1.49907	0.232074	360.569	640.443	19.0977	65.2764	0.764925
2014-06-01	1899-12-31 08:30:00	T	-1.49423	0.35559	466.621	838.732	20.1946	60.9162	0.921657
2014-06-01	1899-12-31 09:00:00	T	-0.982019	0.392327	567.437	1031.29	21.5407	55.3056	1.14496
2014-06-01	1899-12-31 09:30:00	T	-0.703282	0.374426	657.349	1206.8	22.712	50.2404	1.36902
2014-06-01	1899-12-31 10:00:00	T	-1.01639	0.335327	738.482	1370.44	23.5594	47.4267	1.52246
2014-06-01	1899-12-31 10:30:00	T	-0.854223	0.355167	806.019	1509.78	24.1128	46.1408	1.61246
2014-06-01	1899-12-31 11:00:00	T	-1.46543	0.319085	870.84	1649.09	24.9536	43.2057	1.78803
2014-06-01	1899-12-31 11:30:00	T	-0.642888	0.364758	919.485	1755.7	25.7087	39.1378	2.00416
2014-06-01	1899-12-31 12:00:00	T	-1.74045	0.377196	944.399	1819.5	26.6306	35.1895	2.2537
2014-06-01	1899-12-31 12:30:00	T	-1.16958	0.364381	984.533	1914.74	27.5543	28.8724	2.61131
2014-06-01	1899-12-31 13:00:00	T	-0.949803	0.236789	970.512	1908.4	27.7497	25.7101	2.75886
2014-06-01	1899-12-31 13:30:00	T	-0.489637	0.206423	879.744	1742.75	28.3249	21.4464	3.01674
2014-06-01	1899-12-31 14:00:00	T	-1.04888	0.255861	698.014	1407.88	28.5766	19.0199	3.15581
2014-06-01	1899-12-31 14:30:00	T	-0.727974	0.455947	939.319	1866.85	29.2814	16.6898	3.38178
2014-06-01	1899-12-31 15:00:00	T	-0.902546	0.444135	856.906	1711.38	29.2785	17.0703	3.36574
2014-06-01	1899-12-31 15:30:00	T	-0.592572	0.258362	702.521	1418.63	29.6979	17.8359	3.41616
2014-06-01	1899-12-31 16:00:00	T	-0.737509	0.440255	548.787	1109.56	29.4783	19.5511	3.30274
2014-06-01	1899-12-31 16:30:00	T	-1.05372	0.317491	525.463	1062.69	29.1371	19.6766	3.23336
2014-06-01	1899-12-31 17:00:00	T	-0.77983	0.311647	469.927	965.321	29.3075	18.9994	3.29286
2014-06-01	1899-12-31 17:30:00	T	-0.552727	0.270931	332.188	689.829	29.1071	18.5001	3.2751
2014-06-01	1899-12-31 18:00:00	T	-0.846344	0.303051	350.326	730.422	29.2868	17.6333	3.34446
2014-06-01	1899-12-31 18:30:00	T	-0.487754	0.421401	227.24	487.605	29.1777	17.6031	3.32471
2014-06-01	1899-12-31 19:00:00	F	-0.42418	0.39434	131.033	273.599	28.5715	18.6944	3.16758
2014-06-01	1899-12-31 19:30:00	F	-0.00795556	0.365602	52.5624	117.667	27.9669	19.3858	3.03216
2014-06-01	1899-12-31 20:00:00	F	0.285751	0.363528	21.4097	51.1038	27.0764	21.0468	2.81904
2014-06-01	1899-12-31 20:30:00	F	0.362045	0.326956	-3.03116	4.73221	26.01	23.0101	2.58157
2014-06-01	1899-12-31 21:00:00	F	0.419419	0.367854	-5.02226	0.0164099	25.1781	24.7219	2.40262
2014-06-01	1899-12-31 21:30:00	F	-0.33193	0.375358	-4.53544	-0.0166536	24.4868	25.8267	2.27171
2014-06-01	1899-12-31 22:00:00	F	0.178564	0.382093	-3.59923	-0.00965488	24.5864	26.2672	2.27168
2014-06-01	1899-12-31 22:30:00	F	0.0704266	0.285274	-3.66586	-0.0168966	23.7804	33.9671	1.9383
2014-06-01	1899-12-31 23:00:00	F	0.711835	0.373058	-3.4097	-0.0260698	23.1587	39.5791	1.70821
2014-06-01	1899-12-31 23:30:00	F	0.606096	0.354399	-3.85551	-0.0185875	22.5271	43.8057	1.52901
2014-06-02	1899-12-31	F	0.666121	0.448313	-3.31574	-0.0166571	22.2286	44.8072	1.47475
2014-06-02	1899-12-31 00:30:00	F	0.573208	0.51008	-2.43062	-0.0231759	21.9999	45.6341	1.43255
2014-06-02	1899-12-31 01:00:00	F	0.83791	0.437929	-2.72012	-0.0354886	21.7009	46.8948	1.37401
2014-06-02	1899-12-31 01:30:00	F	0.683568	0.437606	-3.34235	-0.0212452	21.2312	53.2741	1.17459
2014-06-02	1899-12-31 02:00:00	F	0.610687	0.442809	-3.07263	-0.00531154	20.6607	58.0997	1.01693
2014-06-02	1899-12-31 02:30:00	F	0.330416	0.286175	-3.19268	-0.0176254	20.2832	60.681	0.932295
2014-06-02	1899-12-31 03:00:00	F	0.506497	0.167939	-2.97675	-0.0306643	19.9566	60.4373	0.919336
2014-06-02	1899-12-31 03:30:00	F	0.512558	0.267697	-2.67159	-0.0123145	20.199	60.4397	0.933156
2014-06-02	1899-12-31 04:00:00	F	0.398674	0.247062	-3.18195	-0.0132806	19.8052	62.8341	0.855544
2014-06-02	1899-12-31 04:30:00	F	0.2664	0.110883	-3.14626	-0.0219736	19.1389	64.7437	0.778662
2014-06-02	1899-12-31 05:00:00	T	0.242645	0.0754745	-3.18802	-0.0524017	18.4037	69.1129	0.651512
2014-06-02	1899-12-31 05:30:00	T	0.557258	0.125206	-2.63886	0.857819	17.5471	73.0699	0.538248
2014-06-02	1899-12-31 06:00:00	T	0.348164	0.172832	5.75507	14.249	17.5986	71.9234	0.562995
2014-06-02	1899-12-31 06:30:00	T	0.114209	0.219199	35.3013	71.0438	18.2654	62.8684	0.776543
2014-06-02	1899-12-31 07:00:00	T	-0.16945	0.273399	78.2245	152.539	19.7602	56.5749	0.996954
2014-06-02	1899-12-31 07:30:00	T	-0.671056	0.310955	110.319	221.106	20.7716	49.9363	1.22355
2014-06-02	1899-12-31 08:00:00	T	-0.227328	0.286285	89.1145	188.599	21.3342	44.8678	1.39487
2014-06-02	1899-12-31 08:30:00	T	-0.358443	0.276458	118.408	252.607	21.8716	42.8347	1.49465
2014-06-02	1899-12-31 09:00:00	T	-1.03352	0.419464	176.528	371.142	21.8335	46.6551	1.39144
2014-06-02	1899-12-31 09:30:00	T	-1.46839	0.381861	298.618	613.577	22.4644	44.2617	1.51083
2014-06-02	1899-12-31 10:00:00	T	-0.969382	0.337565	191.221	417.653	22.4517	43.1481	1.53985
2014-06-02	1899-12-31 10:30:00	T	-0.736687	0.389263	177.821	395.543	22.9286	40.6432	1.65492
2014-06-02	1899-12-31 11:00:00	T	-1.06906	0.300929	196.827	440.72	22.905	38.1082	1.7232
2014-06-02	1899-12-31 11:30:00	T	-1.12604	0.346154	230.073	511.62	23.4234	36.7682	1.81654
2014-06-02	1899-12-31 12:00:00	T	-0.340349	0.256083	189.288	425.302	23.815	34.9532	1.9133
2014-06-02	1899-12-31 12:30:00	T	-1.78137	0.19102	682.551	1373.86	24.3911	39.127	1.85334
2014-06-02	1899-12-31 13:00:00	T	-1.97668	0.230177	432.406	912.569	24.527	40.7553	1.81841
2014-06-02	1899-12-31 13:30:00	T	-1.13807	0.192593	443.44	920.388	25.1208	34.8522	2.07189
2014-06-02	1899-12-31 14:00:00	T	-2.13907	0.319468	465.229	966.206	25.5328	31.8808	2.22019
2014-06-02	1899-12-31 14:30:00	T	-1.38984	0.41004	576.99	1181.1	26.1357	31.9963	2.29693
2014-06-02	1899-12-31 15:00:00	T	-0.838822	0.375201	450.31	934.332	26.3668	31.3943	2.34908
2014-06-02	1899-12-31 15:30:00	T	-1.49697	0.410988	457.622	942.018	26.9173	28.8274	2.5173
2014-06-02	1899-12-31 16:00:00	T	-0.850377	0.487714	600.453	1218.16	27.7076	21.685	2.90139
2014-06-02	1899-12-31 16:30:00	T	-0.190334	0.523807	624.361	1266.52	27.9722	19.9557	3.01164
2014-06-02	1899-12-31 17:00:00	T	-0.841305	0.477071	504.864	1027.43	28.0919	17.9661	3.10817
2014-06-02	1899-12-31 17:30:00	T	-0.736116	0.485306	444.641	918.04	27.3865	21.4885	2.85461
2014-06-02	1899-12-31 18:00:00	T	-0.650577	0.498502	318.016	666.096	27.1948	21.7433	2.81359
2014-06-02	1899-12-31 18:30:00	T	-0.679117	0.475441	251.263	535.193	27.099	20.3576	2.84743
2014-06-02	1899-12-31 19:00:00	F	-0.514661	0.448898	167.738	338.311	26.8709	21.4151	2.77223
2014-06-02	1899-12-31 19:30:00	F	-0.142	0.401034	71.7147	150.617	26.302	22.3093	2.6504
2014-06-02	1899-12-31 20:00:00	F	0.0994931	0.341515	19.9425	52.5915	25.371	24.909	2.42429
2014-06-02	1899-12-31 20:30:00	F	0.277281	0.315563	-2.50774	5.89795	24.3279	28.0055	2.18405
2014-06-02	1899-12-31 21:00:00	F	0.177897	0.320849	-4.73619	0.0263077	23.3644	32.0515	1.94524
2014-06-02	1899-12-31 21:30:00	F	0.186998	0.328449	-4.40113	-0.0299326	22.822	34.4677	1.81552
2014-06-02	1899-12-31 22:00:00	F	0.18106	0.284052	-4.71099	-0.0253478	21.9074	38.1105	1.62182
2014-06-02	1899-12-31 22:30:00	F	0.16587	0.263365	-4.32131	-0.0456291	21.2665	42.0019	1.46136
2014-06-02	1899-12-31 23:00:00	F	-0.0924971	0.231754	-4.56269	-0.0415282	20.6172	44.6924	1.33903
2014-06-02	1899-12-31 23:30:00	F	0.199101	0.194944	-4.3951	-0.0352531	19.447	46.8415	1.19709
2014-06-03	1899-12-31	F	0.296115	0.170965	-3.59959	-0.0403273	19.2428	46.9085	1.18049
2014-06-03	1899-12-31 00:30:00	F	0.256105	0.268109	-2.80921	-0.0540947	19.8637	42.8553	1.32062
2014-06-03	1899-12-31 01:00:00	F	0.363057	0.269316	-3.15211	-0.0422612	19.5531	43.5012	1.28077
2014-06-03	1899-12-31 01:30:00	F	0.451635	0.309697	-2.76084	-0.046849	19.5102	44.688	1.25052
2014-06-03	1899-12-31 02:00:00	F	0.483769	0.329331	-3.21903	-0.0330835	19.3132	47.4247	1.17413
2014-06-03	1899-12-31 02:30:00	F	0.407646	0.232668	-3.40645	-0.0255975	18.8047	51.049	1.05904
2014-06-03	1899-12-31 03:00:00	F	0.390839	0.181783	-3.39473	-0.0326013	18.3973	54.1455	0.967045
2014-06-03	1899-12-31 03:30:00	F	0.259099	0.175508	-3.33033	-0.0241503	17.5567	60.6753	0.786587
2014-06-03	1899-12-31 04:00:00	F	0.336663	0.305548	-2.9822	-0.0333292	17.8216	63.3319	0.745763
2014-06-03	1899-12-31 04:30:00	F	0.365856	0.195229	-3.24932	-0.0417832	17.2493	64.829	0.689945
2014-06-03	1899-12-31 05:00:00	T	0.483536	0.167323	-2.88771	-0.0381613	16.9627	66.9955	0.635795
2014-06-03	1899-12-31 05:30:00	T	0.427171	0.329372	-1.5726	1.27603	17.4938	67.3556	0.650322
2014-06-03	1899-12-31 06:00:00	T	-0.137911	0.449135	10.8514	24.9935	17.6209	67.9996	0.642615
2014-06-03	1899-12-31 06:30:00	T	-0.328067	0.548529	71.3965	129.431	18.2388	66.4177	0.701108
2014-06-03	1899-12-31 07:00:00	T	-0.83097	0.520043	147.184	269.041	18.6605	65.1641	0.746751
2014-06-03	1899-12-31 07:30:00	T	-1.65445	0.581692	291.745	524.117	19.5184	62.0763	0.857614
2014-06-03	1899-12-31 08:00:00	T	-1.22874	0.515682	201.969	390.985	19.7452	61.4402	0.88436
2014-06-03	1899-12-31 08:30:00				446.602	812.901			0
2014-06-03	1899-12-31 09:00:00				501.879	936.543			0
2014-06-03	1899-12-31 09:30:00	T	-1.22687	0.484396	545.629	1029.04	22.4775	56.919	1.16838
2014-06-03	1899-12-31 10:00:00	T	-1.31079	0.487926	689.461	1304.69	23.3279	55.1091	1.28177
2014-06-03	1899-12-31 10:30:00	T	-2.03448	0.490645	825.674	1556.31	24.2754	52.509	1.4355
2014-06-03	1899-12-31 11:00:00	T	-2.02697	0.578458	870.258	1670.13	25.0393	50.7198	1.55911
2014-06-03	1899-12-31 11:30:00	T	-1.49643	0.518036	508.965	1026.96	24.4412	52.4591	1.45133
2014-06-03	1899-12-31 12:00:00	T	-1.39927	0.534789	469.743	956.346	24.5421	52.2333	1.46704
2014-06-03	1899-12-31 12:30:00	T	-1.68039	0.582247	597.03	1201.63	25.6611	48.6363	1.68622
2014-06-03	1899-12-31 13:00:00	T	-1.30606	0.528691	333.304	713.665	25.0307	50.5378	1.56408
2014-06-03	1899-12-31 13:30:00	T	1.59491	0.530906	370.106	786.027	23.8154	52.8779	1.38559
2014-06-03	1899-12-31 14:00:00	T	-0.442731	0.970384	135.333	323.388	16.4336	70.9631	0.540861
2014-06-03	1899-12-31 14:30:00	T	1.30201	0.931234	61.0692	161.68	12.8786	93.6447	0.0940973
2014-06-03	1899-12-31 15:00:00	T	0.93777	0.763995	32.0368	88.298	12.3429	94.4721	0.0790217
2014-06-03	1899-12-31 15:30:00	T	-0.305901	0.739656	23.2374	64.5806	12.9947	91.1415	0.132163
2014-06-03	1899-12-31 16:00:00	T	0.329146	0.538632	16.017	45.372	13.5612	89.772	0.158339
2014-06-03	1899-12-31 16:30:00	T	0.813771	0.420382	19.5539	55.6022	14.1982	87.8925	0.195349
2014-06-03	1899-12-31 17:00:00	T	0.492826	0.396574	24.0868	67.4237	14.0211	88.802	0.178612
2014-06-03	1899-12-31 17:30:00	T	-2.29652	0.88497	68.6198	156.898	13.5574	90.8247	0.142005
2014-06-03	1899-12-31 18:00:00	T	-3.51314	0.700387	41.667	94.8714	12.5545	96.3082	0.0535113
2014-06-03	1899-12-31 18:30:00	T	0.960076	0.519548	55.3327	118.101	12.2674	98.4592	0.021916
2014-06-03	1899-12-31 19:00:00	F	0.435795	0.608009	57.6238	117.273	12.9342	95.4621	0.0674318
2014-06-03	1899-12-31 19:30:00	F	0.624886	0.612127	32.1273	60.849	13.4477	93.2477	0.103758
2014-06-03	1899-12-31 20:00:00	F	1.12406	0.664766	9.93072	16.8057	13.6121	91.3619	0.134166
2014-06-03	1899-12-31 20:30:00	F	1.15998	0.548321	2.83545	3.59952	13.8133	90.5748	0.14832
2014-06-03	1899-12-31 21:00:00	F	2.24538	0.658944	1.11792	0.0106306	14.0312	90.5266	0.1512
2014-06-03	1899-12-31 21:30:00	F	1.30301	0.659812	-1.61916	-0.0645052	13.8568	90.6214	0.148002
2014-06-03	1899-12-31 22:00:00	F	1.51878	0.692868	-1.99693	-0.0613653	13.676	91.3971	0.134176
2014-06-03	1899-12-31 22:30:00	-9999	-9999	-9999	-2.15054	-0.0649898		-9999
2014-06-03	1899-12-31 23:00:00	F	1.29224	0.735463	-2.75001	-0.0654729	13.5765	91.1848	0.1366
2014-06-03	1899-12-31 23:30:00	F	1.22106	0.736221	-3.11537	-0.0591916	13.4099	90.2049	0.15015
2014-06-04	1899-12-31	F	1.13296	0.551801	-3.48765	-0.0632994	13.1798	90.3638	0.145515
2014-06-04	1899-12-31 00:30:00	F	1.08406	0.622052	-3.22195	-0.0509788	13.0539	90.6939	0.13938
2014-06-04	1899-12-31 01:00:00	F	1.08426	0.491043	-1.95962	-0.0570196	13.0758	90.3917	0.144113
2014-06-04	1899-12-31 01:30:00	F	1.07336	0.418586	-1.60501	-0.0681335	12.9176	91.5239	0.125823
2014-06-04	1899-12-31 02:00:00	F	0.996078	0.334546	-2.34661	-0.0681335	12.6779	92.1191	0.115166
2014-06-04	1899-12-31 02:30:00	F	1.2308	0.296173	-3.60877	-0.0804574	12.2061	92.2478	0.109829
2014-06-04	1899-12-31 03:00:00	F	0.957082	0.217849	-3.07613	-0.0889173	12.0939	91.6377	0.117602
2014-06-04	1899-12-31 03:30:00	F	1.02656	0.183477	-3.37764	-0.0722484	12.0726	91.3565	0.121388
2014-06-04	1899-12-31 04:00:00	F	0.642634	0.0466873	-3.48166	-0.0778085	11.8031	90.5917	0.129803
2014-06-04	1899-12-31 04:30:00	F	0.66899	0.249604	-2.98532	-0.0686284	11.7513	90.3717	0.132386
2014-06-04	1899-12-31 05:00:00	T	0.157358	0.412538	-4.15759	-0.0437395	12.0219	90.0154	0.139757
2014-06-04	1899-12-31 05:30:00	T	0.991191	0.46589	-3.41689	2.27585	12.0394	89.6299	0.14532
2014-06-04	1899-12-31 06:00:00	T	0.354104	0.391561	16.8425	37.3646	12.0187	89.5613	0.146083
2014-06-04	1899-12-31 06:30:00	T	0.0346541	0.320035	83.7563	148.137	12.428	89.0356	0.157625
2014-06-04	1899-12-31 07:00:00	T	-0.269386	0.332155	183.541	325.09	13.3535	85.2824	0.224793
2014-06-04	1899-12-31 07:30:00	T	-0.925288	0.244058	291.371	523.967	14.3697	79.8896	0.328122
2014-06-04	1899-12-31 08:00:00	T	-2.18635	0.363598	405.01	736.245	15.0427	77.037	0.391292
2014-06-04	1899-12-31 08:30:00	T	-1.37945	0.365925	509.386	930.499	15.3777	76.3388	0.411961
2014-06-04	1899-12-31 09:00:00	T	-1.59817	0.183916	610.029	1123.24	16.2235	70.9803	0.533361
2014-06-04	1899-12-31 09:30:00	T	-1.34691	0.158455	702.744	1306.88	17.0443	68.8748	0.602683
2014-06-04	1899-12-31 10:00:00	T	-1.09227	0.258281	778.268	1458.26	17.7765	63.8943	0.732242
2014-06-04	1899-12-31 10:30:00	T	-1.34077	0.445094	867.503	1629.82	18.5165	60.5204	0.838767
2014-06-04	1899-12-31 11:00:00	T	-1.25311	0.376656	919.947	1743.47	18.9114	61.9542	0.828482
2014-06-04	1899-12-31 11:30:00	T	-0.60582	0.241823	967.777	1851.26	19.4405	60.1396	0.897093
2014-06-04	1899-12-31 12:00:00	T	-0.640313	0.293231	907.673	1756.33	20.1341	56.587	1.02001
2014-06-04	1899-12-31 12:30:00	T	-0.784728	0.666014	943.154	1824.93	21.2241	47.6783	1.31481
2014-06-04	1899-12-31 13:00:00	T	-1.14699	0.560156	966.563	1892.29	21.4543	48.2684	1.31842
2014-06-04	1899-12-31 13:30:00	T	-0.602371	0.554896	869.212	1716.87	21.8265	47.6723	1.3643
2014-06-04	1899-12-31 14:00:00	T	-0.57028	0.595976	933.199	1850.31	22.2	43.865	1.49734
2014-06-04	1899-12-31 14:30:00	T	-0.178899	0.5715	913.886	1823.35	22.5848	42.2535	1.5768
2014-06-04	1899-12-31 15:00:00	T	-0.262928	0.518913	845.687	1702.22	22.804	41.8355	1.60946
2014-06-04	1899-12-31 15:30:00	T	-0.0952837	0.461756	809.693	1640.23	23.1484	39.2211	1.71727
2014-06-04	1899-12-31 16:00:00	T	-0.416222	0.52218	730.788	1495.63	23.3349	37.6218	1.78246
2014-06-04	1899-12-31 16:30:00	T	-0.135894	0.522498	587.953	1225.26	23.3069	38.1593	1.7641
2014-06-04	1899-12-31 17:00:00	T	-0.577451	0.526926	559.758	1180.91	23.4722	37.5169	1.80029
2014-06-04	1899-12-31 17:30:00	T	-0.587669	0.521378	442.102	956.431	23.4763	34.9664	1.87432
2014-06-04	1899-12-31 18:00:00	T	-0.623797	0.469269	368.683	818.342	23.4235	33.8961	1.89914
2014-06-04	1899-12-31 18:30:00	T	-0.0582854	0.422019	233.568	535.295	23.3643	35.2942	1.85231
2014-06-04	1899-12-31 19:00:00	F	0.0801996	0.449565	138.223	300.457	22.9937	36.4752	1.77823
2014-06-04	1899-12-31 19:30:00	F	0.0666718	0.276929	80.5411	176.371	22.5214	39.8146	1.63714
2014-06-04	1899-12-31 20:00:00	F	0.226678	0.127426	19.4684	55.5688	21.9518	41.4951	1.53721
2014-06-04	1899-12-31 20:30:00	F	0.356169	0.0946983	-0.430847	6.65261	22.0982	39.333	1.60834
2014-06-04	1899-12-31 21:00:00	F	0.245195	0.056371	-2.37199	0.0994706	21.2967	43.3884	1.42905
2014-06-04	1899-12-31 21:30:00	F	-0.00535597	0.0278666	-1.27688	0.00338054	21.4029	41.4917	1.4866
2014-06-04	1899-12-31 22:00:00	F	0.0751806	0.0616858	-0.488274	0.00144882	21.6319	38.7325	1.57872
2014-06-04	1899-12-31 22:30:00	F	11.4366	0.310898	-0.473566	-0.0198016	21.5185	38.9898	1.56123
2014-06-04	1899-12-31 23:00:00	F	0.251435	0.0874343	-3.08576	0.00144894	19.754	48.2029	1.18885
2014-06-04	1899-12-31 23:30:00	F	0.732188	0.11137	-2.74583	-0.00362236	19.3443	48.772	1.14624
2014-06-05	1899-12-31	F	0.340716	0.122111	-2.44544	0.00120751	18.9474	48.5309	1.12351
2014-06-05	1899-12-31 00:30:00	F	0.169832	0.0416745	-2.12542	-0.00144903	18.9058	48.3838	1.12381
2014-06-05	1899-12-31 01:00:00	F	0.224496	0.0726034	-2.08482	-0.00724517	18.521	50.113	1.06032
2014-06-05	1899-12-31 01:30:00	F	0.110639	0.0194299	-2.03239	-0.00603771	18.6088	48.9783	1.09043
2014-06-05	1899-12-31 02:00:00	F	0.324024	0.100636	-1.53195	-0.00821143	18.4332	49.456	1.06841
2014-06-05	1899-12-31 02:30:00	F	0.815097	0.159363	-2.6412	-0.0113512	17.7697	51.9912	0.97337
2014-06-05	1899-12-31 03:00:00	F	0.761699	0.169351	-2.94985	-0.0198046	16.847	56.2125	0.837465
2014-06-05	1899-12-31 03:30:00	F	0.594166	0.0882545	-2.44561	-0.0263265	16.4966	58.8335	0.769989
2014-06-05	1899-12-31 04:00:00	F	0.535747	0.101995	-2.00489	-0.0297091	16.6008	58.0554	0.789762
2014-06-05	1899-12-31 04:30:00	F	0.188968	0.115585	-3.00502	-0.0376814	16.2641	60.048	0.736287
2014-06-05	1899-12-31 05:00:00	T	-0.757498	0.138517	-2.35264	-0.0137684	15.7951	63.0269	0.661272
2014-06-05	1899-12-31 05:30:00	T	0.015759	0.0915891	0.396578	1.39169	15.9715	62.8686	0.671634
2014-06-05	1899-12-31 06:00:00	T	-0.0780788	0.0534379	8.78069	20.7666	15.5856	66.0903	0.598386
2014-06-05	1899-12-31 06:30:00	T	0.0663528	0.0745116	28.5294	59.4037	15.3807	68.1913	0.553975
2014-06-05	1899-12-31 07:00:00	T	0.337452	0.138674	48.4504	102.904	15.2258	70.2109	0.513657
2014-06-05	1899-12-31 07:30:00	T	-0.168059	0.0800043	83.9324	178.386	15.2912	71.3514	0.496065
2014-06-05	1899-12-31 08:00:00	T	-0.242385	0.0333572	109.82	235.28	15.6595	72.4987	0.487568
2014-06-05	1899-12-31 08:30:00	T	-1.14156	0.0874309	145.456	306.89	16.4321	72.6674	0.509058
2014-06-05	1899-12-31 09:00:00	T	-0.757272	0.171278	282.374	564.961	18.1999	63.4481	0.761282
2014-06-05	1899-12-31 09:30:00	T	-1.12471	0.25117	599.159	1143.9	19.7503	56.1432	1.00626
2014-06-05	1899-12-31 10:00:00	T	-0.756723	0.217496	367.277	737.353	20.6029	51.4693	1.17381
2014-06-05	1899-12-31 10:30:00	T	-1.41665	0.245848	543.441	1055.26	20.9181	52.1006	1.18121
2014-06-05	1899-12-31 11:00:00	T	-1.05795	0.309005	940.636	1789.3	21.975	45.958	1.42185
2014-06-05	1899-12-31 11:30:00	T	-0.381777	0.237137	957.06	1840.35	22.3554	43.6081	1.51848
2014-06-05	1899-12-31 12:00:00	T	-0.826279	0.199666	988.671	1918.4	23.0034	37.8201	1.74156
2014-06-05	1899-12-31 12:30:00	T	-1.2611	0.202817	1004.28	1965.59	23.9877	33.1678	1.98637
2014-06-05	1899-12-31 13:00:00	T	-0.747966	0.309604	1016.8	1997.28	24.5666	25.6611	2.28767
2014-06-05	1899-12-31 13:30:00	T	-0.120944	0.232341	999.224	1982.97	24.9999	23.5407	2.41461
2014-06-05	1899-12-31 14:00:00	T	0.0881361	0.423325	973.307	1943.33	25.2816	24.4838	2.42512
2014-06-05	1899-12-31 14:30:00	T	0.258287	0.409574	931.35	1875.65	25.3258	23.9773	2.44782
2014-06-05	1899-12-31 15:00:00	T	-0.346846	0.527095	881.225	1789.42	25.6962	21.9356	2.56948
2014-06-05	1899-12-31 15:30:00	T	-0.524302	0.299912	818.855	1677.17	25.5769	22.0175	2.54869
2014-06-05	1899-12-31 16:00:00	T	-0.484284	0.28525	674.551	1402.7	25.9216	22.1519	2.59678
2014-06-05	1899-12-31 16:30:00	T	-0.345516	0.167867	530.754	1126.73	25.8816	22.2416	2.58765
2014-06-05	1899-12-31 17:00:00	T	-1.21781	0.251691	443.352	961.039	25.891	21.5979	2.61054
2014-06-05	1899-12-31 17:30:00	T	-0.62661	0.197405	385.326	848.006	26.0317	20.9425	2.65438
2014-06-05	1899-12-31 18:00:00	T	-0.238371	0.253436	215.266	484.059	25.962	21.5026	2.62472
2014-06-05	1899-12-31 18:30:00	T	-0.468262	0.115855	217.175	480.164	25.9951	21.6839	2.62378
2014-06-05	1899-12-31 19:00:00	F	-0.284442	0.109619	153.661	318.127	25.9096	21.739	2.60871
2014-06-05	1899-12-31 19:30:00	F	0.0611948	0.12515	65.4479	154.019	25.2073	24.9217	2.40041
2014-06-05	1899-12-31 20:00:00	F	-0.292969	0.13057	22.9756	62.0293	23.8757	31.122	2.03351
2014-06-05	1899-12-31 20:30:00	F	-0.183343	0.130468	-1.20744	7.15883	23.4648	28.9534	2.04638
2014-06-05	1899-12-31 21:00:00	F	3.05278	0.425802	-4.6109	0.0912445	21.4045	43.355	1.43936
2014-06-05	1899-12-31 21:30:00	F	-0.0992417	0.206701	-4.78155	0.00506968	20.4639	47.5148	1.2587
2014-06-05	1899-12-31 22:00:00	F	0.551464	0.0673216	-2.77023	-0.00410469	20.6582	45.661	1.31889
2014-06-05	1899-12-31 22:30:00	F	0.138017	0.0213149	-0.364185	-0.00265607	21.2363	42.3175	1.45072
2014-06-05	1899-12-31 23:00:00	F	8.95589	0.267552	-0.922659	-0.00845117	21.1237	43.2397	1.41769
2014-06-05	1899-12-31 23:30:00	F	1.49393	0.684166	-2.15243	0.00362185	19.4061	54.8341	1.0144
2014-06-06	1899-12-31	F	0.680261	0.773339	-1.77002	-0.00627796	18.7087	57.1717	0.920961
2014-06-06	1899-12-31 00:30:00	F	1.40685	0.859174	-1.86165	-0.00700264	18.1184	60.5785	0.816893
2014-06-06	1899-12-31 01:00:00	F	0.51631	0.917005	-2.22349	-0.0111081	17.2426	67.4494	0.638252
2014-06-06	1899-12-31 01:30:00	F	0.993737	0.988035	-1.91107	-0.00917667	16.3717	67.1875	0.608819
2014-06-06	1899-12-31 02:00:00	F	0.604867	0.91027	-1.9135	-0.00700377	15.1344	72.5994	0.469696
2014-06-06	1899-12-31 02:30:00	F	1.28768	1.02037	-1.1357	-0.00845352	14.2488	75.3467	0.399131
2014-06-06	1899-12-31 03:00:00	F	0.706747	0.99335	-1.22416	-0.00676337	13.174	79.6621	0.307039
2014-06-06	1899-12-31 03:30:00	F	1.02106	0.786172	-2.7396	-0.0202923	12.0403	89.1159	0.152533
2014-06-06	1899-12-31 04:00:00	F	1.05306	0.79841	-1.44087	-0.0446953	11.2122	92.6235	0.0978707
2014-06-06	1899-12-31 04:30:00	F	1.3527	0.634856	-0.652931	-0.0635455	10.9077	92.3198	0.0998604
2014-06-06	1899-12-31 05:00:00	T	0.905538	0.530809	-0.778506	-0.0678999	10.3447	91.2933	0.109043
2014-06-06	1899-12-31 05:30:00	T	1.26576	0.635626	-0.189996	0.232471	10.4319	92.1332	0.0990976
2014-06-06	1899-12-31 06:00:00	T	0.883475	0.293185	0.79163	3.2249	10.5291	92.0713	0.100527
2014-06-06	1899-12-31 06:30:00	T	0.409732	0.148943	3.75266	10.3835	10.5157	91.9298	0.102231
2014-06-06	1899-12-31 07:00:00	T	1.01526	0.440234	21.6494	47.5547	10.5893	90.863	0.116315
2014-06-06	1899-12-31 07:30:00	T	0.333204	0.379106	49.4515	104.44	10.7071	91.9155	0.103726
2014-06-06	1899-12-31 08:00:00	T	0.42734	0.310388	68.44	144.124	10.9794	92.2879	0.100754
2014-06-06	1899-12-31 08:30:00	T	-0.187674	0.142794	180.594	354.612	11.3785	90.9785	0.121023
2014-06-06	1899-12-31 09:00:00	T	-0.60572	0.194495	455.082	838.143	12.0621	87.8892	0.169971
2014-06-06	1899-12-31 09:30:00	T	-1.35631	0.418496	693.275	1277.58	13.0905	82.9889	0.255411
2014-06-06	1899-12-31 10:00:00	T	-1.63525	0.422028	766.116	1424.96	14.1764	74.7819	0.406372
2014-06-06	1899-12-31 10:30:00	T	-0.714818	0.428379	860.439	1607.82	14.8422	70.9128	0.489334
2014-06-06	1899-12-31 11:00:00	T	-0.898164	0.49093	922.985	1735.88	15.7037	68.2955	0.563705
2014-06-06	1899-12-31 11:30:00	T	-2.22819	0.4327	959.033	1814.29	16.4288	61.4014	0.718832
2014-06-06	1899-12-31 12:00:00	T	-1.24484	0.398361	994.1	1894.37	17.017	59.467	0.783593
2014-06-06	1899-12-31 12:30:00	T	-0.559389	0.396833	1025.2	1969.75	17.7514	51.542	0.981356
2014-06-06	1899-12-31 13:00:00	T	-0.580222	0.332415	980.779	1895.79	18.4315	48.2173	1.09449
2014-06-06	1899-12-31 13:30:00	T	-0.890177	0.345672	877.177	1717.04	18.9042	39.1352	1.32518
2014-06-06	1899-12-31 14:00:00	T	-0.751348	0.482682	988.771	1937.86	19.8658	34.3554	1.5174
2014-06-06	1899-12-31 14:30:00	T	-0.307371	0.540893	959.314	1887.42	20.2765	30.0994	1.65743
2014-06-06	1899-12-31 15:00:00	T	-0.355636	0.520374	857.641	1701.31	20.469	29.401	1.694
2014-06-06	1899-12-31 15:30:00	T	-0.601606	0.588005	775.368	1553.28	20.6403	29.9631	1.69834
2014-06-06	1899-12-31 16:00:00	T	-0.668924	0.442508	760.209	1528.07	20.623	28.2579	1.73786
2014-06-06	1899-12-31 16:30:00	T	-0.0919863	0.568418	677.217	1387.74	21.0694	25.3188	1.85946
2014-06-06	1899-12-31 17:00:00	T	-0.683632	0.508	575.5	1194.08	21.2555	22.6603	1.94781
2014-06-06	1899-12-31 17:30:00	T	-0.767705	0.328874	475.221	1012.35	21.2814	21.9682	1.96837
2014-06-06	1899-12-31 18:00:00	T	-0.584812	0.348382	371.656	813.978	21.0798	21.3294	1.9601
2014-06-06	1899-12-31 18:30:00	T	-0.714545	0.257268	265.806	605.244	21.1464	21.1352	1.97299
2014-06-06	1899-12-31 19:00:00	F	-0.535675	0.355838	167.205	345.263	21.0478	21.9582	1.94062
2014-06-06	1899-12-31 19:30:00	F	-0.277993	0.246018	82.7741	177.367	20.6443	23.6262	1.85256
2014-06-06	1899-12-31 20:00:00	F	0.210563	0.103757	22.7193	69.7972	19.9007	27.1249	1.68828
2014-06-06	1899-12-31 20:30:00	F	0.371371	0.085446	-1.91921	9.03213	19.1392	29.9655	1.54746
2014-06-06	1899-12-31 21:00:00	F	0.363807	0.042347	-4.47643	0.0994839	19.0862	28.9475	1.56479
2014-06-06	1899-12-31 21:30:00	F	0.267515	0.0729121	-4.07391	-0.00748664	18.4306	31.8419	1.44075
2014-06-06	1899-12-31 22:00:00	F	0.142519	0.0899585	-3.23306	-0.00338135	18.369	31.293	1.44676
2014-06-06	1899-12-31 22:30:00	F	0.817815	0.0808076	-3.55395	-0.00603834	18.1972	30.6989	1.44364
2014-06-06	1899-12-31 23:00:00	F	0.241838	0.0782734	-3.45468	-0.00241542	18.1576	28.8056	1.47941
2014-06-06	1899-12-31 23:30:00	F	-0.0366845	0.0466103	-2.50444	-0.00362319	18.2778	26.9948	1.52855
2014-06-07	1899-12-31	F	0.182307	0.039774	-3.53371	-0.00531413	17.9394	28.199	1.4717
2014-06-07	1899-12-31 00:30:00	F	0.267875	0.0612057	-2.32491	-0.00386491	18.1941	26.6559	1.52759
2014-06-07	1899-12-31 01:00:00	F	-0.0224595	0.0682954	-3.5004	-0.00531435	17.6912	27.9703	1.4535
2014-06-07	1899-12-31 01:30:00	F	0.463698	0.11393	-3.33718	-0.00338186	17.3075	29.2112	1.39426
2014-06-07	1899-12-31 02:00:00	F	-0.192226	0.117983	-3.85345	-0.0036235	16.8597	31.409	1.31319
2014-06-07	1899-12-31 02:30:00	F	0.556424	0.150343	-4.82774	-0.00144943	13.9836	52.172	0.761292
2014-06-07	1899-12-31 03:00:00	F	-0.742338	0.0881204	-2.4515	-0.00893879	14.9646	45.2956	0.927781
2014-06-07	1899-12-31 03:30:00	F	-0.449314	0.0902555	-3.13274	-0.00821451	14.5892	46.0629	0.892887
2014-06-07	1899-12-31 04:00:00	F	-0.801307	0.134046	-3.23265	-0.0130471	13.8405	47.696	0.824867
2014-06-07	1899-12-31 04:30:00	F	1.68952	0.116693	-3.48505	-0.0077319	12.9137	50.1635	0.739861
2014-06-07	1899-12-31 05:00:00	T	0.3771	0.1253	-2.72686	-0.00193303	13.8296	43.8153	0.885458
2014-06-07	1899-12-31 05:30:00	T	0.177779	0.168502	-2.02434	2.4193	13.4598	45.9131	0.832126
2014-06-07	1899-12-31 06:00:00	T	0.244136	0.175267	19.4413	37.0481	13.7891	44.9635	0.865078
2014-06-07	1899-12-31 06:30:00	T	-0.0285069	0.191978	75.4876	134.411	14.5011	43.7791	0.92543
2014-06-07	1899-12-31 07:00:00	T	-0.457496	0.247876	183.891	321.426	15.0344	45.0212	0.936636
2014-06-07	1899-12-31 07:30:00	T	-0.822388	0.405124	271.998	485.023	15.4684	43.1575	0.995771
2014-06-07	1899-12-31 08:00:00	T	-0.282998	0.348091	326.012	598.194	16.2937	39.1896	1.12302
2014-06-07	1899-12-31 08:30:00	T	-1.51881	0.445076	502.374	911.854	17.4841	37.4713	1.24532
2014-06-07	1899-12-31 09:00:00	T	-1.68909	0.422305	608.546	1114.88	18.6015	35.0191	1.38833
2014-06-07	1899-12-31 09:30:00	T	-1.50213	0.385002	529.188	998.949	18.8187	34.6699	1.41488
2014-06-07	1899-12-31 10:00:00	T	-1.83467	0.3794	771.402	1436.22	19.6874	33.9861	1.50916
2014-06-07	1899-12-31 10:30:00	T	-1.53268	0.409798	792.708	1493.49	20.5286	29.4836	1.69825
2014-06-07	1899-12-31 11:00:00	T	-1.69042	0.357571	888.068	1693.61	21.1287	26.5573	1.83527
2014-06-07	1899-12-31 11:30:00	T	-1.52213	0.345593	601.673	1191.99	21.3537	26.6405	1.85865
2014-06-07	1899-12-31 12:00:00	T	-2.36644	0.438209	890.355	1726.38	22.1093	26.1107	1.96052
2014-06-07	1899-12-31 12:30:00	T	-2.10509	0.262004	832.861	1627.92	22.3487	25.8005	1.99764
2014-06-07	1899-12-31 13:00:00	T	-1.68181	0.349719	777.507	1535.83	22.7905	26.6162	2.02936
2014-06-07	1899-12-31 13:30:00	T	-1.45194	0.330532	866.645	1710.6	23.3659	25.229	2.14093
2014-06-07	1899-12-31 14:00:00	T	-1.6232	0.266104	731.467	1464.33	23.6057	24.7316	2.18656
2014-06-07	1899-12-31 14:30:00	T	-1.43158	0.313908	735.91	1483.94	23.9392	25.7928	2.19938
2014-06-07	1899-12-31 15:00:00	T	-1.24428	0.245328	596.086	1221.28	24.0965	25.5787	2.22665
2014-06-07	1899-12-31 15:30:00	T	-1.44928	0.276278	519.784	1070.24	24.4015	24.5757	2.29829
2014-06-07	1899-12-31 16:00:00	T	-1.43511	0.415745	539.979	1110.52	24.2117	27.441	2.18592
2014-06-07	1899-12-31 16:30:00	T	-1.04655	0.390576	515.794	1070.37	23.9535	29.3893	2.09448
2014-06-07	1899-12-31 17:00:00	T	-1.19697	0.42775	433.375	921.466	23.9787	30.7274	2.05786
2014-06-07	1899-12-31 17:30:00	T	-1.46296	0.363223	401.035	862.077	24.043	32.0892	2.02517
2014-06-07	1899-12-31 18:00:00	T	-1.14222	0.418201	337.813	735.444	23.7763	32.8003	1.9721
2014-06-07	1899-12-31 18:30:00	T	-0.884862	0.492952	231.32	504.547	23.4105	33.8985	1.89758
2014-06-07	1899-12-31 19:00:00	F	0.79804	0.448492	63.7301	141.847	22.6025	35.0592	1.77533
2014-06-07	1899-12-31 19:30:00	F	0.384106	0.389539	69.0726	145.507	19.7683	45.3021	1.25659
2014-06-07	1899-12-31 20:00:00	F	0.381713	0.288214	15.5241	39.6237	19.6235	47.1941	1.20224
2014-06-07	1899-12-31 20:30:00	F	1.41688	0.278351	-3.10179	3.18134	19.4593	50.0476	1.1257
2014-06-07	1899-12-31 21:00:00	F	0.0953653	0.0790308	-1.12573	0.069056	18.958	55.1653	0.979255
2014-06-07	1899-12-31 21:30:00	F	1.03761	0.197392	-1.36967	-0.020768	19.2282	51.3053	1.08168
2014-06-07	1899-12-31 22:00:00	F	0.99569	0.205299	-1.5017	-0.0103839	19.1408	50.8716	1.08539
2014-06-07	1899-12-31 22:30:00	F	0.738207	0.354398	-2.36813	-0.00796885	18.8273	54.412	0.987629
2014-06-07	1899-12-31 23:00:00	F	0.582487	0.444707	-3.39104	-0.0217335	17.3938	58.6609	0.818452
2014-06-07	1899-12-31 23:30:00	F	0.196479	0.0656824	-1.94268	-0.0120748	16.8304	60.9633	0.745776
2014-06-08	1899-12-31	F	0.978463	0.143549	-2.83668	-0.0120753	16.8162	62.3291	0.719025
2014-06-08	1899-12-31 00:30:00	F	-0.682273	0.274097	-1.29668	-0.0190798	17.2806	57.8714	0.828149
2014-06-08	1899-12-31 01:00:00	F	-0.649301	0.523638	-1.48934	-0.00579649	16.3023	64.783	0.65057
2014-06-08	1899-12-31 01:30:00	F	0.454159	0.493231	-1.58002	-0.00386439	15.237	72.0957	0.481495
2014-06-08	1899-12-31 02:00:00	F	0.820562	0.438987	-1.66815	-0.00313992	15.5845	66.7002	0.587577
2014-06-08	1899-12-31 02:30:00	F	0.734416	0.3849	-2.61863	-0.00338154	15.9194	62.6707	0.67297
2014-06-08	1899-12-31 03:00:00	F	0.635391	0.252286	-3.54439	-0.0043477	16.2474	58.458	0.764788
2014-06-08	1899-12-31 03:30:00	F	0.520523	0.156493	-3.9289	-0.00289853	16.4602	54.3006	0.852838
2014-06-08	1899-12-31 04:00:00	F	0.0678315	0.162075	-3.91165	-0.00144929	16.2024	52.7218	0.867948
2014-06-08	1899-12-31 04:30:00	F	0.407873	0.15169	-4.22578	-0.00241558	14.8644	61.138	0.654772
2014-06-08	1899-12-31 05:00:00	T	0.636456	0.226745	-3.71044	-0.000724599	14.5295	63.9238	0.594828
2014-06-08	1899-12-31 05:30:00	T	0.53443	0.119001	-2.13921	2.32552	14.3121	69.6605	0.493234
2014-06-08	1899-12-31 06:00:00	T	0.504562	0.190786	15.9951	34.6379	15.2407	64.9797	0.604473
2014-06-08	1899-12-31 06:30:00	T	-1.04355	0.114271	79.2667	137.291	15.741	61.9761	0.677725
2014-06-08	1899-12-31 07:00:00	T	-0.569673	0.167569	183.66	311.642	16.7358	57.5955	0.805302
2014-06-08	1899-12-31 07:30:00	T	-1.43919	0.158017	297.615	505.993	17.6014	56.5653	0.8713
2014-06-08	1899-12-31 08:00:00	T	-1.30527	0.212444	408.595	706.35	19.2861	45.5779	1.21336
2014-06-08	1899-12-31 08:30:00	T	-1.25686	0.16716	507.895	893.033	19.9736	38.1856	1.43837
2014-06-08	1899-12-31 09:00:00	T	-1.3629	0.246446	611.512	1083.72	21.0062	27.9844	1.7861
2014-06-08	1899-12-31 09:30:00	T	-1.82842	0.355924	720.527	1289.82	21.7162	23.4347	1.98344
2014-06-08	1899-12-31 10:00:00	T	-1.2187	0.428679	814.532	1467.77	22.2874	8.23883	2.46154
2014-06-08	1899-12-31 10:30:00	T	-1.17474	0.472285	879.796	1609.82	22.5305	10.9563	2.42417
2014-06-08	1899-12-31 11:00:00	T	-1.07349	0.497626	935.324	1732.14	22.9278	12.3027	2.4457
2014-06-08	1899-12-31 11:30:00	T	-1.10769	0.556134	983.575	1833.48	23.4971	9.64041	2.60813
2014-06-08	1899-12-31 12:00:00	T	-0.901976	0.457034	1016.17	1912.24	23.482	9.44384	2.61144
2014-06-08	1899-12-31 12:30:00	T	-1.3055	0.425491	1034.71	1957.58	23.7217	8.39684	2.68005
2014-06-08	1899-12-31 13:00:00	T	-0.491359	0.330978	1034.21	1972.1	23.8053	8.28176	2.69695
2014-06-08	1899-12-31 13:30:00	T	-0.998421	0.246232	1024.18	1966.85	24.2609	9.86081	2.72398
2014-06-08	1899-12-31 14:00:00	T	-0.569156	0.441204	1001.2	1934.36	24.7373	10.8759	2.77114
2014-06-08	1899-12-31 14:30:00	T	-0.979582	0.479729	953.197	1860.02	24.7342	11.4111	2.75397
2014-06-08	1899-12-31 15:00:00	T	-1.22124	0.386952	891.81	1766.1	24.7123	11.8844	2.73568
2014-06-08	1899-12-31 15:30:00	T	-1.08051	0.456273	833.031	1658.5	24.9671	10.4871	2.82164
2014-06-08	1899-12-31 16:00:00	T	-0.884684	0.340654	755.621	1522.7	24.8886	10.5155	2.80758
2014-06-08	1899-12-31 16:30:00	T	-0.749792	0.425025	673.229	1368.86	25.2406	10.2958	2.8741
2014-06-08	1899-12-31 17:00:00	T	-0.893713	0.377129	575.185	1187.31	24.9562	9.72042	2.84397
2014-06-08	1899-12-31 17:30:00	T	-0.845745	0.282085	478.869	1005.02	24.744	8.91164	2.83337
2014-06-08	1899-12-31 18:00:00	T	-0.911393	0.248172	373.693	808.316	24.631	8.29932	2.83325
2014-06-08	1899-12-31 18:30:00	T	-0.68402	0.412378	271.049	608.99	24.6609	7.85089	2.8522
2014-06-08	1899-12-31 19:00:00	F	-0.647002	0.341493	174.188	352.394	24.412	8.39159	2.79356
2014-06-08	1899-12-31 19:30:00	F	-0.249712	0.306836	88.0366	183.824	23.8071	9.04551	2.67478
2014-06-08	1899-12-31 20:00:00	F	0.258583	0.236995	22.5716	71.692	22.7393	12.4713	2.41328
2014-06-08	1899-12-31 20:30:00	F	0.697222	0.351809	-2.63245	8.98893	22.2243	11.9497	2.3529
2014-06-08	1899-12-31 21:00:00	F	0.776986	0.253845	-7.35982	0.113942	20.5579	15.2948	2.04384
2014-06-08	1899-12-31 21:30:00	F	0.56049	0.22689	-6.74552	-0.0410455	19.6719	16.7416	1.90178
2014-06-08	1899-12-31 22:00:00	F	0.667602	0.177346	-6.15009	-0.0475702	19.0673	17.585	1.81301
2014-06-08	1899-12-31 22:30:00	F	-0.317041	0.169235	-5.19953	-0.0410541	18.5196	18.287	1.73708
2014-06-08	1899-12-31 23:00:00	F	0.322253	0.194699	-5.86068	-0.0359849	17.8988	18.8856	1.65843
2014-06-08	1899-12-31 23:30:00	F	0.284873	0.22997	-5.26814	-0.0410587	17.5276	19.0703	1.61639
2014-06-09	1899-12-31	F	0.616407	0.246139	-5.25712	-0.0311573	16.7951	21.3121	1.50041
2014-06-09	1899-12-31 00:30:00	F	0.17037	0.217585	-5.22437	-0.0330905	16.3314	21.2363	1.45822
2014-06-09	1899-12-31 01:00:00	F	0.365016	0.197025	-4.73477	-0.0256041	16.0302	21.7401	1.42131
2014-06-09	1899-12-31 01:30:00	F	0.195511	0.205385	-4.9051	-0.0270544	15.2461	23.9615	1.31332
2014-06-09	1899-12-31 02:00:00	F	0.197013	0.184718	-4.5683	-0.0318872	14.9321	24.7753	1.27328
2014-06-09	1899-12-31 02:30:00	F	1.18986	0.218286	-4.37641	-0.0251239	14.6897	25.0176	1.24949
2014-06-09	1899-12-31 03:00:00	F	0.559982	0.250678	-4.2751	-0.0043485	14.6353	24.1622	1.25932
2014-06-09	1899-12-31 03:30:00	F	0.34056	0.22455	-4.36353	-0.0108714	14.1839	24.7569	1.2135
2014-06-09	1899-12-31 04:00:00	F	0.408713	0.231839	-4.00719	-0.0169114	13.789	25.4517	1.17187
2014-06-09	1899-12-31 04:30:00	F	0.291991	0.210003	-3.73696	-0.0147376	13.9823	24.5694	1.20072
2014-06-09	1899-12-31 05:00:00	T	0.273903	0.165966	-3.89781	-0.00241602	13.604	25.6447	1.15486
2014-06-09	1899-12-31 05:30:00	T	0.272133	0.154145	-0.691088	2.82296	13.4664	26.5134	1.13118
2014-06-09	1899-12-31 06:00:00	T	0.201145	0.146346	32.7625	50.1427	13.2238	27.8606	1.09301
2014-06-09	1899-12-31 06:30:00	T	-0.410725	0.177821	97.3529	163.249	13.792	28.1675	1.12939
2014-06-09	1899-12-31 07:00:00	T	-0.65989	0.22974	189.336	323.575	14.9513	26.3403	1.24832
2014-06-09	1899-12-31 07:30:00	T	-0.947368	0.245584	296.493	514.778	15.8378	24.916	1.34696
2014-06-09	1899-12-31 08:00:00	T	-1.16041	0.326068	408.468	717.882	16.9666	22.0042	1.50348
2014-06-09	1899-12-31 08:30:00	T	-1.05125	0.334132	514.017	912.128	17.8076	19.6992	1.6324
2014-06-09	1899-12-31 09:00:00	T	-1.53071	0.377585	617.355	1106.13	18.4854	18.8031	1.72241
2014-06-09	1899-12-31 09:30:00	T	-1.60292	0.377641	716.296	1295.27	19.1994	17.5434	1.82892
2014-06-09	1899-12-31 10:00:00	T	-1.45418	0.349971	795.008	1451.67	19.8448	16.9545	1.91737
2014-06-09	1899-12-31 10:30:00	T	-0.936127	0.363529	870.727	1603.82	20.1877	16.3076	1.97377
2014-06-09	1899-12-31 11:00:00	T	-1.08319	0.363871	926.185	1727.74	20.6781	16.1845	2.0374
2014-06-09	1899-12-31 11:30:00	T	-1.22416	0.350273	974.051	1829.18	21.5255	14.1434	2.19847
2014-06-09	1899-12-31 12:00:00	T	-1.05938	0.331092	1010.18	1906.14	21.777	14.9712	2.211
2014-06-09	1899-12-31 12:30:00	T	-1.00291	0.573921	1030.63	1963.41	22.696	14.4561	2.35235
2014-06-09	1899-12-31 13:00:00	T	-1.01727	0.462012	1033.31	1981.88	22.5691	14.0016	2.34672
2014-06-09	1899-12-31 13:30:00	T	-0.328918	0.379915	1022.59	1979.97	22.9637	13.499	2.41757
2014-06-09	1899-12-31 14:00:00	T	-1.10416	0.28893	992.805	1937.46	23.353	12.3171	2.50895
2014-06-09	1899-12-31 14:30:00	T	-1.21005	0.275508	916.026	1801.85	23.4381	11.1674	2.55495
2014-06-09	1899-12-31 15:00:00	T	-0.688214	0.118608	912.114	1807.28	23.7121	10.7025	2.61107
2014-06-09	1899-12-31 15:30:00	T	-0.845172	0.360016	841.021	1683.27	24.0124	10.8089	2.65544
2014-06-09	1899-12-31 16:00:00	T	-1.29113	0.338856	786.411	1590.15	24.4781	10.4015	2.74308
2014-06-09	1899-12-31 16:30:00	T	-0.86294	0.253175	676.443	1375.33	24.4081	10.0433	2.74254
2014-06-09	1899-12-31 17:00:00	T	-0.434755	0.260458	589.451	1215.99	24.7608	10.0105	2.80198
2014-06-09	1899-12-31 17:30:00	T	-0.861507	0.305632	505.421	1062	24.7382	8.97781	2.83034
2014-06-09	1899-12-31 18:00:00	T	-0.714706	0.31609	394.869	856.319	24.7235	8.86091	2.83149
2014-06-09	1899-12-31 18:30:00	T	-0.71421	0.383304	264.75	593.955	24.5711	8.82539	2.80692
2014-06-09	1899-12-31 19:00:00	F	-0.199343	0.308639	138.088	312.523	24.1196	8.99241	2.72704
2014-06-09	1899-12-31 19:30:00	F	-0.302258	0.369837	109.816	211.278	23.724	9.91317	2.63604
2014-06-09	1899-12-31 20:00:00	F	0.287098	0.313741	29.3154	78.3609	22.9113	11.0274	2.4788
2014-06-09	1899-12-31 20:30:00	F	0.353474	0.297566	-3.4151	8.25097	22.081	11.2794	2.35022
2014-06-09	1899-12-31 21:00:00	F	0.690712	0.271133	-6.57711	0.114665	21.3814	11.9078	2.23593
2014-06-09	1899-12-31 21:30:00	F	0.61766	0.127808	-6.60377	-0.011589	20.2104	14.2283	2.02567
2014-06-09	1899-12-31 22:00:00	F	0.825584	0.184989	-4.86138	-0.018593	19.9475	13.5531	2.00868
2014-06-09	1899-12-31 22:30:00	F	0.585901	0.210909	-5.65063	-0.0178696	18.8861	15.3669	1.84089
2014-06-09	1899-12-31 23:00:00	F	0.360111	0.149482	-5.72626	-0.0161804	18.3105	16.1849	1.75858
2014-06-09	1899-12-31 23:30:00	F	0.271116	0.141258	-4.99893	-0.0072453	18.2207	15.7941	1.75685
2014-06-10	1899-12-31	F	0.200201	0.152864	-5.41176	-0.00531354	17.8786	16.1491	1.71222
2014-06-10	1899-12-31 00:30:00	F	0.229498	0.133437	-5.45661	-0.00869514	17.2293	17.1247	1.62436
2014-06-10	1899-12-31 01:00:00	F	0.184119	0.156601	-4.89655	-0.0243958	16.3172	19.0242	1.49782
2014-06-10	1899-12-31 01:30:00	F	0.11571	0.227152	-4.76961	-0.0135271	16.1212	20.1136	1.45932
2014-06-10	1899-12-31 02:00:00	F	0.410812	0.210172	-4.68409	-0.0166675	15.6333	21.9088	1.3827
2014-06-10	1899-12-31 02:30:00	F	0.409531	0.279115	-4.46452	-0.0106288	15.4552	23.3674	1.34147
2014-06-10	1899-12-31 03:00:00	F	0.494927	0.200428	-4.74026	-0.0118369	14.7873	25.1617	1.25497
2014-06-10	1899-12-31 03:30:00	F	0.0482707	0.164916	-4.27312	-0.0115956	14.4504	27.0039	1.19773
2014-06-10	1899-12-31 04:00:00	F	0.2171	0.1545	-4.06879	-0.0113545	14.1529	28.3868	1.15262
2014-06-10	1899-12-31 04:30:00	F	0.176521	0.143876	-3.84063	-0.0171532	13.7678	29.2766	1.1102
2014-06-10	1899-12-31 05:00:00	T	0.187923	0.18394	-3.44428	-0.00604006	13.9269	29.0574	1.12521
2014-06-10	1899-12-31 05:30:00	T	-0.707838	0.179512	-2.03925	2.57698	13.3569	31.0047	1.05448
2014-06-10	1899-12-31 06:00:00	T	0.30629	0.169554	33.0448	51.6274	13.1955	32.1928	1.02545
2014-06-10	1899-12-31 06:30:00	T	-0.433002	0.224905	150.948	238.139	14.6421	30.4888	1.15474
2014-06-10	1899-12-31 07:00:00	T	-1.15947	0.255425	260.099	435.534	16.561	28.3619	1.34578
2014-06-10	1899-12-31 07:30:00	T	-0.526138	0.284285	219.084	399.55	17.1215	27.959	1.40234
2014-06-10	1899-12-31 08:00:00	T	-1.0166	0.304368	298.864	545.229	17.5599	27.3208	1.45451
2014-06-10	1899-12-31 08:30:00	T	-1.23176	0.334978	376.145	689.482	18.1788	26.8392	1.52232
2014-06-10	1899-12-31 09:00:00	T	-1.16663	0.338193	602.348	1088.39	19.1901	24.9309	1.66403
2014-06-10	1899-12-31 09:30:00	T	-1.42096	0.400403	629.706	1155.03	19.9685	22.4285	1.80471
2014-06-10	1899-12-31 10:00:00	T	-1.14224	0.42722	688.541	1270.82	20.2942	19.4052	1.91323
2014-06-10	1899-12-31 10:30:00	T	-1.29846	0.540087	789.944	1470.18	21.1905	18.0875	2.05483
2014-06-10	1899-12-31 11:00:00	T	-1.82324	0.52652	685.51	1299.77	21.4082	18.4944	2.07208
2014-06-10	1899-12-31 11:30:00	T	-0.837542	0.473431	1054.4	1978.12	22.2554	16.6458	2.23157
2014-06-10	1899-12-31 12:00:00	T	-1.08801	0.487668	997.35	1889.09	22.7187	15.2299	2.33427
2014-06-10	1899-12-31 12:30:00	T	-0.926561	0.466966	1017.49	1939.56	23.1259	14.2801	2.41935
2014-06-10	1899-12-31 13:00:00	T	-1.11285	0.426516	1026.31	1975.89	23.5771	14.145	2.49004
2014-06-10	1899-12-31 13:30:00	T	-0.970185	0.381395	830.453	1614.41	23.8771	12.6837	2.57856
2014-06-10	1899-12-31 14:00:00	T	-1.0025	0.441039	779.396	1529.99	24.1755	12.835	2.62062
2014-06-10	1899-12-31 14:30:00	T	-1.1357	0.420808	705.571	1394.52	24.2227	11.6806	2.66286
2014-06-10	1899-12-31 15:00:00	T	-0.889284	0.417002	768.966	1522.37	24.7118	11.7103	2.74101
2014-06-10	1899-12-31 15:30:00	T	-1.21882	0.485027	732.206	1463.85	24.675	11.8374	2.73106
2014-06-10	1899-12-31 16:00:00	T	-1.85333	0.413025	447.563	911.733	24.378	11.8765	2.68179
2014-06-10	1899-12-31 16:30:00	T	-0.951243	0.337843	461.904	940.483	24.599	11.871	2.71765
2014-06-10	1899-12-31 17:00:00	T	-0.635087	0.359824	671.401	1377.32	24.8294	11.7619	2.7587
2014-06-10	1899-12-31 17:30:00	T	-0.920896	0.332197	489.483	1032.7	24.6998	11.6606	2.74058
2014-06-10	1899-12-31 18:00:00	T	-0.792799	0.402128	381.689	829.891	24.6795	11.9502	2.72828
2014-06-10	1899-12-31 18:30:00	T	-0.66991	0.309599	279.974	633.54	24.4235	11.7235	2.69378
2014-06-10	1899-12-31 19:00:00	F	-0.500922	0.275565	177.143	359.539	24.2479	12.0711	2.65509
2014-06-10	1899-12-31 19:30:00	F	-0.211357	0.258093	89.5815	187.771	23.8185	13.3161	2.55087
2014-06-10	1899-12-31 20:00:00	F	-0.0982538	0.130626	25.9577	80.2598	22.758	15.3432	2.33672
2014-06-10	1899-12-31 20:30:00	F	0.264768	0.131174	-1.10017	10.6144	21.6665	16.802	2.14882
2014-06-10	1899-12-31 21:00:00	F	0.159871	0.171387	-5.01029	0.141946	21.2253	17.2417	2.08049
2014-06-10	1899-12-31 21:30:00	F	0.385121	0.182351	-4.50473	-0.0111064	21.2017	16.8206	2.08806
2014-06-10	1899-12-31 22:00:00	F	-0.545856	0.176829	-5.48484	-0.00748523	19.9518	19.5191	1.87049
2014-06-10	1899-12-31 22:30:00	F	-0.329433	0.222428	-4.64591	-0.00748558	19.7679	20.4532	1.82782
2014-06-10	1899-12-31 23:00:00	F	0.171957	0.179581	-4.88676	-0.00676155	18.8779	21.718	1.70182
2014-06-10	1899-12-31 23:30:00	F	0.209871	0.162089	-4.56606	-0.0120748	18.572	22.1572	1.66021
2014-06-11	1899-12-31	F	0.0479248	0.16296	-4.17109	-0.0263245	18.4455	21.9453	1.6516
2014-06-11	1899-12-31 00:30:00	F	0.16697	0.161301	-4.38509	-0.0137665	17.9237	22.8809	1.5792
2014-06-11	1899-12-31 01:00:00	F	0.25149	0.161919	-3.74839	-0.0149748	18.0481	22.5439	1.59856
2014-06-11	1899-12-31 01:30:00	F	0.301234	0.150821	-3.8686	-0.0067629	18.1545	22.1689	1.61707
2014-06-11	1899-12-31 02:00:00	F	0.0194549	0.125582	-3.76308	-0.00700445	18.2239	22.2187	1.62309
2014-06-11	1899-12-31 02:30:00	F	0.197254	0.0918086	-3.5094	-0.0137676	18.5644	21.7827	1.6674
2014-06-11	1899-12-31 03:00:00	F	-0.139079	0.102058	-3.27178	-0.0072461	18.6882	21.7159	1.68181
2014-06-11	1899-12-31 03:30:00	F	0.0261299	0.0908269	-3.34497	-0.00821228	18.6867	22.0141	1.67525
2014-06-11	1899-12-31 04:00:00	F	2.00045	0.390838	-4.02659	-0.0200478	17.8203	23.8657	1.54891
2014-06-11	1899-12-31 04:30:00	F	-0.475509	0.167606	-5.26168	-0.0178744	15.5704	29.2827	1.24707
2014-06-11	1899-12-31 05:00:00	T	0.159909	0.114438	-4.31839	-0.000966137	15.8385	28.8217	1.27693
2014-06-11	1899-12-31 05:30:00	T	0.302383	0.110826	-2.55964	2.49281	15.8115	28.8708	1.27384
2014-06-11	1899-12-31 06:00:00	T	0.334413	0.116633	25.9243	44.0881	15.8799	28.7952	1.28079
2014-06-11	1899-12-31 06:30:00	T	-0.277643	0.120386	102.25	169.763	15.9707	29.6064	1.27356
2014-06-11	1899-12-31 07:00:00	T	-0.778774	0.149972	200.547	343.363	16.031	30.7433	1.25782
2014-06-11	1899-12-31 07:30:00	T	-1.77113	0.18612	308.139	538.162	16.8105	29.6998	1.34172
2014-06-11	1899-12-31 08:00:00	T	-1.25817	0.226207	416.183	738.456	17.9276	27.902	1.4767
2014-06-11	1899-12-31 08:30:00	T	-1.25955	0.276878	525.507	938.647	19.1938	24.6599	1.67043
2014-06-11	1899-12-31 09:00:00	T	-1.18612	0.336176	634.137	1140.18	19.9689	24.0115	1.7679
2014-06-11	1899-12-31 09:30:00	T	-1.06365	0.364665	715.59	1299.69	20.9358	22.8661	1.90487
2014-06-11	1899-12-31 10:00:00	T	-1.10251	0.356231	803.938	1474.79	21.7848	21.7538	2.03552
2014-06-11	1899-12-31 10:30:00	T	-0.962218	0.257264	874.293	1623.79	22.4046	19.8039	2.16655
2014-06-11	1899-12-31 11:00:00	T	-0.953848	0.359437	932.656	1751.5	23.1569	18.3243	2.30946
2014-06-11	1899-12-31 11:30:00	T	-0.819254	0.300374	973.813	1850.22	23.6076	17.3389	2.40176
2014-06-11	1899-12-31 12:00:00	T	-1.23188	0.263039	970.992	1861.35	24.1189	16.7105	2.49554
2014-06-11	1899-12-31 12:30:00	T	-1.11045	0.327669	997.728	1923.1	24.3655	14.6742	2.59465
2014-06-11	1899-12-31 13:00:00	T	-0.93343	0.308526	1019.13	1976.51	24.638	14.6321	2.63858
2014-06-11	1899-12-31 13:30:00	T	-0.937174	0.336151	997.048	1954.43	24.8673	14.6229	2.67524
2014-06-11	1899-12-31 14:00:00	T	-1.35627	0.458694	972.511	1918.87	25.3887	14.7242	2.75629
2014-06-11	1899-12-31 14:30:00	T	-1.32847	0.352792	906.671	1799.04	25.7295	14.7722	2.811
[truncated: 6,834 more rows]
